# Supplementary material for: GC-biased gene conversion drives accelerated evolution of ultraconserved elements in mammalian and avian genomes
Source: HighWire-hosted journal article supplement (doi:10.1101/gr.277784.123), 2023-10-01
Supplement: Supplemental_Data.zip [file Supplemental_Data_README.docx]

**Supplemental Data Information**

**Supplemental Data S1: 19-way *ZNF536* coding sequence alignment.** The canonical conserved transcript of human *ZNF536* (ENST00000355537.4) were used as the reference to obtain alignment.

**Supplemental Data S2: Human and chicken orthologous sequences of mUCE.1304.**

**Supplemental Data S3: *d*N/*d*S value of *ZNF536* in 69 mammals.** Phylogenetic tree of 69 selected mammals in Newick format with number representing *d*N/*d*S value of *ZNF536.*

**Supplemental Data S4: 19-way *ZNF536* coding sequence alignment used for *d*N/*d*S analysis in PAML.**
