# Supplementary material for: GC-biased gene conversion drives accelerated evolution of ultraconserved elements in mammalian and avian genomes
Source: HighWire-hosted journal article supplement (doi:10.1101/gr.277784.123), 2023-10-01
Supplement: Supplemental_Tables.xlsx [file Supplemental_Tables.xlsx]

## Sheet: S1
Supplemental Table S1: Eutherian species and the correspomding data analyzed in this study.
Please note: The number of fast-evolving UCEs in a single species may not always be greater than the number of gBGC-induced fast-evolving UCEs in the same species due to their different backgrounds. Both lineage-specific and species-specific fast-evolving UCEs were taken into consideration when calculating gBGC-induced fast-evolving UCEs for each species.
Common name	Scientific name	Classification (order/clade/superorder)	Assembly ID	Contig N50	Scaffold N50	Assembly size (bp) (AS)	log10(AS)	Bodym ass (g) (BM)	log10(BM)	Sources (BM)	Generation length (day) (GL)	log10(GL)	Sources (GL)	Genome-wide neutral substitution rate	Fast-evolving UCEs	gBGC-induced fast-evolving UCEs
Nine-banded armadillo	Dasypus novemcinctus	Cingulata	GCA_000208655.1	26277	1687935	4813823562	9.68249	3949.01	3.59649	Pantheria	1825	3.26126	Pacifici et al. 2013	/	/	/
Aardvark	Orycteropus afer	Afrotheria	GCF_000298275.1	17683	7875832	4444080527	9.64778	56175.2	4.74954	Pantheria	3624.82	3.55929	Pacifici et al. 2013	0.141631	22	9
Florida manatee	Trichechus manatus latirostris	Afrotheria	GCA_000243295.1	37750	14442683	3103808406	9.49189	467325	5.66962	Pantheria	7300	3.86332	Pacifici et al. 2013	0.0780552	50	6
Cape elephant shrew	Elephantulus edwardii	Afrotheria	GCA_000299155.1	24219	15011382	3843982861	9.58478	49.69	1.69627	Pantheria	750.226	2.87519	Pacifici et al. 2013	0.261469	28	7
Cape golden mole	Chrysochloris asiatica	Afrotheria	GCF_000296735.1	19631	13470186	4210110458	9.62429	37.16	1.57008	Pantheria	1036.56	3.01559	Pacifici et al. 2013	0.181222	18	3
Cape rock hyrax	Procavia capensis	Afrotheria	GCA_000152225.2	35792	905827	3602182911	9.55657	2952.48	3.47019	Pantheria	3079.14	3.48843	Pacifici et al. 2013	0.18406	85	23
Small Madagascar hedgehog	Echinops telfairi	Afrotheria	GCF_000313985.1	20428	45764842	2947024286	9.46938	152.25	2.18256	Pantheria	1967.09	3.29382	Pacifici et al. 2013	0.286089	49	15
African savanna elephant	Loxodonta africana	Afrotheria	GCF_000001905.1	69023	46401353	3196738102	9.50471	3824540	6.58258	Pantheria	9125	3.96023	Pacifici et al. 2013	0.0950818	41	12
Rabbit	Oryctolagus cuniculus	Glires	GCF_000003625.3	64648	35972871	2737473256	9.43735	1590.57	3.20155	Pantheria	1515.35	3.18051	Pacifici et al. 2013	0.139977	24	5
American pika	Ochotona princeps	Glires	GCF_000292845.1	42347	26863993	2229824103	9.34827	157.63	2.19764	Pantheria	1045.75	3.01943	Pacifici et al. 2013	0.245607	21	8
Long-tailed chinchilla	Chinchilla lanigera	Glires	GCF_000276665.1	61105	21893125	2390868971	9.37856	480.28	2.68149	Pantheria	1825	3.26126	Pacifici et al. 2013	0.0929486	16	14
Degu	Octodon degus	Glires	GCF_000260255.1	19847	12091372	2995889303	9.47653	203.27	2.30807	Pantheria	1310.05	3.11729	Pacifici et al. 2013	0.135849	41	25
Domestic guinea pig	Cavia porcellus	Glires	GCF_000151735.1	80583	27942054	2723219641	9.43508	728	2.86213	AnAge	134	2.1271	AnAge	0.134963	33	17
Naked mole-rat	Heterocephalus glaber	Glires	GCF_000247695.1	47778	20532749	2618204639	9.418	39.36	1.59506	Pantheria	2023.31	3.30606	Pacifici et al. 2013	0.104162	22	12
Norway rat	Rattus norvegicus	Glires	GCF_000001895.5	100461	14986627	2870184193	9.45791	282.89	2.45162	Pantheria	594.038	2.77381	Pacifici et al. 2013	0.0965967	72	29
Mouse	Mus musculus	Glires	GCF_000001635.26	32273079	52589046	2730855475	9.4363	19.3	1.28556	Pantheria	628.295	2.79816	Pacifici et al. 2013	0.0909992	31	14
Golden hamster	Mesocricetus auratus	Glires	GCF_000349665.1	237700	12753307	2504908775	9.39879	98.6	1.99388	Pantheria	787.913	2.89648	Pacifici et al. 2013	0.109242	41	21
North American deer mouse	Peromyscus maniculatus	Glires	GCF_000500345.1	36367	3760915	2630541020	9.42005	19.98	1.3006	Pantheria	940.126	2.97319	Pacifici et al. 2013	0.103226	30	29
Prairie vole	Microtus ochrogaster	Glires	GCF_000317375.1	21250	17270019	2287340943	9.35933	42.5	1.62839	Pantheria	615.402	2.78916	Pacifici et al. 2013	0.117454	55	31
Lesser Egyptian jerboa	Jaculus jaculus	Glires	GCF_000280705.1	15675	22080993	2835233679	9.45259	59.8	1.7767	Pantheria	919.856	2.96372	Pacifici et al. 2013	0.231649	63	11
Thirteen-lined ground squirrel	Ictidomys tridecemlineatus	Glires	GCF_000236235.1	44137	8192786	2478393770	9.39417	172.7	2.23729	AnAge	382	2.58206	AnAge	0.18267	7	2
Chinese tree shrew	Tupaia chinensis	Scandentia	GCF_000334495.1	25938	3670124	2846580235	9.45432	200	2.30103	Pantheria	1458.08	3.16378	Pacifici et al. 2013 (Mean_congenerics_same_body_mass)	0.224044	23	2
Sunda flying lemur	Galeopterus variegatus	Dermoptera	GCF_000696425.1	20752	245189	3187660572	9.50347	1112.2	3.04618	Pantheria	2840.44	3.45339	Pacifici et al. 2013 (Mean_all_orders_same_body_mass)	0.130172	5	0
Small-eared galago	Otolemur garnettii	Primates	GCF_000181295.1	27100	13852661	2519724550	9.40135	811.17	2.90911	Pantheria	2277.71	3.3575	Pacifici et al. 2013	0.154442	24	4
Gray mouse lemur	Microcebus murinus	Primates	GCF_000165445.2	210702	108171978	2487409138	9.39575	69	1.83885	Pantheria	2053.51	3.3125	Pacifici et al. 2013	0.066003	30	0
Coquerel's sifaka	Propithecus coquereli	Primates	GCF_000956105.1	28129	5604909	2798152141	9.44687	4189.27	3.62214	Pantheria	3650	3.56229	Pacifici et al. 2013	0.0455846	16	1
Aye-aye	Daubentonia madagascariensis	Primates	GCA_000241425.1	3358	193839	2855365987	9.45566	2731.37	3.43638	Pantheria	2920	3.46538	Pacifici et al. 2013	0.0589589	6	0
Philippine tarsier	Carlito syrichta	Primates	GCF_000164805.1	38165	401181	3453864774	9.53831	119.2	2.07628	AnAge	179	2.25285	AnAge	0.16755	46	9
Ma's night monkey	Aotus nancymaae	Primates	GCF_000952055.2	126456	8268663	2861684817	9.45662	791.03	2.89819	Pantheria	3047.84	3.48399	Pacifici et al. 2013	0.0259422	4	0
Bolivian squirrel monkey	Saimiri boliviensis boliviensis	Primates	GCF_000235385.1	38823	18744880	2608572064	9.4164	799.45	2.90279	Pantheria	3354.66	3.52565	Pacifici et al. 2013	0.036266	4	1
White-tufted-ear marmoset	Callithrix jacchus	Primates	GCF_000004665.1	29273	5167444	2914958544	9.46463	290.21	2.46271	Pantheria	2156.52	3.33375	Pacifici et al. 2013	0.0386875	14	0
Chimpanzee	Pan troglodytes	Primates	GCF_002880755.1	12268567	53103722	3024031013	9.48059	45000	4.65321	Pantheria	7300	3.86332	Pacifici et al. 2013	0.0070251	16	0
Human	Homo sapiens	Primates	GCF_000001405.38	57879411	67794873	3099706404	9.49132	58540.6	4.76746	Pantheria	10220	4.00945	Pantheria	0.00719293	16	0
Northern white-cheeked gibbon	Nomascus leucogenys	Primates	GCF_000146795.2	35148	52956880	2962077449	9.4716	7320	3.86451	Pantheria	5475	3.73838	Pacifici et al. 2013	0.0246474	11	0
Sumatran orangutan	Pongo abelii	Primates	GCF_002880775.1	11074009	98475126	3065035716	9.48644	39696.1	4.59875	Pantheria	9125	3.96023	Pacifici et al. 2013	0.0201549	10	0
Western gorilla	Gorilla gorilla	Primates	GCF_000151905.2	52934	81227029	3063362754	9.4862	112589	5.0515	Pantheria	8030	3.90472	Pacifici et al. 2013	0.00978886	13	0
Olive baboon	Papio anubis	Primates	GCF_000264685.3	149817	585721	2959356508	9.4712	17728.6	4.24867	Pantheria	3833.59	3.58361	Pacifici et al. 2013	0.0125546	9	0
Ugandan red Colobus	Piliocolobus tephrosceles	Primates	GCF_002776525.1	70213	10172280	2922819259	9.4658	8923.14	3.95052	Pacifici et al. 2013 (Mean_of_same_genus)	3650	3.56229	Pacifici et al. 2013	0.0202906	1	0
Green monkey	Chlorocebus sabaeus	Primates	GCF_000409795.2	90449	81825804	2789639778	9.44555	5900	3.77085	Pacifici et al. 2013	4533.48	3.65643	Pacifici et al. 2013	0.0137517	10	0
Dog	Canis lupus familiaris	Carnivora	GCF_000002285.3	267478	45876610	2410976875	9.38219	31756.5	4.50183	Pantheria	2883.26	3.45988	Pacifici et al. 2013	0.107842	12	1
Lesser panda	Ailurus fulgens	Carnivora	GCA_002007465.1	99577	2983736	2342939051	9.36976	5170.08	3.7135	Pantheria	3650	3.56229	Pacifici et al. 2013	0.0627084	7	2
Sea otter	Enhydra lutris	Carnivora	GCF_002288905.1	244529	38751465	2455276666	9.3901	27410.9	4.43792	Pantheria	5475	3.73838	Pacifici et al. 2013	0.0261255	8	3
Domestic ferret	Mustela putorius furo	Carnivora	GCF_000215625.1	44823	9335154	2410863155	9.38217	975.55	2.98925	Pantheria	1652.46	3.21813	Pacifici et al. 2013	0.0348243	3	3
Hawaiian monk seal	Neomonachus schauinslandi	Carnivora	GCF_002201575.1	112698	29518589	2400934290	9.38038	61309.7	4.78753	Pantheria	2161.06	3.33467	Morgan Ernest 2003	0.0557929	10	1
Polar bear	Ursus maritimus	Carnivora	GCF_000687225.1	46506	15940661	2301362327	9.36198	371704	5.5702	Pantheria	5475	3.73838	Pacifici et al. 2013	0.0696787	12	4
Cat	Felis catus	Carnivora	GCF_000181335.3	41915695	83967707	2521846836	9.40172	2884.8	3.46012	Pantheria	354	2.549	AnAge	0.0119412	3	1
Tiger	Panthera tigris	Carnivora	GCF_000464555.1	30032	8860407	2391065193	9.37859	119700	5.07809	AnAge	1373	3.13767	AnAge	0.00573759	9	2
Beluga whale	Delphinapterus leucas	Cetartiodactyla	GCF_002288925.1	159142	19885328	2358522448	9.37264	1.38164e+06	6.1404	Pantheria	5659.88	3.75281	Pacifici et al. 2013	0.0080974	45	3
Yangtze River dolphin	Lipotes vexillifer	Cetartiodactyla	GCF_000442215.1	31902	2419148	2429212129	9.38547	112138	5.04975	Pantheria	4840.09	3.68485	Pacifici et al. 2013	0.00015149	6	2
Minke whale	Balaenoptera acutorostrata	Cetartiodactyla	GCF_000493695.1	22690	12843668	2431687698	9.38591	5.58709e+06	6.74719	Pantheria	8030	3.90472	Pacifici et al. 2013	0.00030011	14	4
Killer whale	Orcinus orca	Cetartiodactyla	GCF_000331955.2	70300	12735091	2372919875	9.37528	5.62876e+06	6.75041	Pantheria	9380.5	3.97223	Pacifici et al. 2013	0.00614696	11	1
Grey whale	Eschrichtius robustus	Cetartiodactyla	GCA_002189225.1	10066	187455	2849453582	9.45476	2.7324e+07	7.43654	Pantheria	10444.3	4.01888	Pacifici et al. 2013	0.00848874	14	4
Yangtze finless porpoise	Neophocaena asiaeorientalis	Cetartiodactyla	GCF_003031525.1	86003	6341296	2284628084	9.35882	32500	4.51188	Pacifici et al. 2013	6095.5	3.78501	Pacifici et al. 2013	0.0107832	34	6
Sperm whale	Physeter catodon	Cetartiodactyla	GCF_002837175.1	119918	37183148	2517760647	9.40101	28500000	7.45484	AnAge	3424	3.53453	AnAge	0.0244083	10	2
Bottlenose dolphin	Tursiops truncatus	Cetartiodactyla	GCF_001922835.1	44299	26555543	2132499883	9.32889	281041	5.44877	Pantheria	6427.88	3.80807	Pacifici et al. 2013	0.00037895	17	4
Antarctic minke whale	Balaenoptera bonaerensis	Cetartiodactyla	GCA_000978805.1	8410	20082	2234641557	9.34921	4.99041e+07	7.69814	Pacifici et al. 2013	8030	3.90472	Pacifici et al. 2013	0.00015491	10	4
Hippopotamus	Hippopotamus amphibius	Cetartiodactyla	GCA_002995585.1	34064	110752	2425746322	9.38485	1536310	6.18648	Pantheria	3650	3.56229	Pacifici et al. 2013	0.0818233	11	4
Cattle	Bos taurus	Cetartiodactyla	GCF_000003055.6	96955	6380747	2670123310	9.42653	750000	5.87506	AnAge	825	2.91645	AnAge	0.037243	7	6
Goat	Capra hircus	Cetartiodactyla	GCF_001704415.1	26244591	87277232	2922813246	9.4658	61000	4.78533	AnAge	561	2.74896	AnAge	0.0136682	4	9
Chiru	Pantholops hodgsonii	Cetartiodactyla	GCA_000400835.1	18674	2772860	2696869832	9.43086	32733.1	4.51499	Pantheria	2190	3.34044	Pacifici et al. 2013	0.0214021	16	9
Sheep	Ovis aries	Cetartiodactyla	GCF_000298735.2	150472	100009711	2615499683	9.41755	80000	4.90309	AnAge	694	2.84136	AnAge	0.0180694	15	5
Pere David's deer	Elaphurus davidianus	Cetartiodactyla	GCA_002443075.1	276603	2844142	2584693296	9.41241	165989	5.22008	Pantheria	3530.65	3.54785	Pacifici et al. 2013	0.00978174	14	8
Red deer	240867	Cetartiodactyla	GCA_002197005.1	7944	107358006	3438623608	9.53638	240867	5.38178	Pantheria	5209.45	3.71679	Pacifici et al. 2013	0.00546454	13	7
white-tailed deer	Odocoileus virginianus	Cetartiodactyla	GCF_002102435.1	122019	850721	2380505687	9.37667	75901.2	4.88025	Pantheria	2713.88	3.43359	Pacifici et al. 2013	0.00347393	3	7
Giraffa	Giraffa tippelskirchi	Cetartiodactyla	GCA_001651235.1	47894	212164	2705072464	9.43218	964655	5.98437	Pantheria	5251.01	3.72024	Pacifici et al. 2013 (Mean_congenerics_same_body_mass)	0.0206561	6	7
Okapi	Okapia johnstoni	Cetartiodactyla	GCA_001660835.1	39571	111538	2878133036	9.45911	230001	5.36173	Pantheria	4764.24	3.67799	Pacifici et al. 2013	0.0218845	7	7
Pig	Sus scrofa	Cetartiodactyla	GCA_000325925.2	31939	5853977	2508912457	9.39949	84471.5	4.92671	Pantheria	2656.07	3.42424	Pacifici et al. 2013	0.150855	11	3
Arabian camel	Camelus dromedarius	Cetartiodactyla	GCF_000767585.1	69131	4188677	2004047047	9.30191	434000	5.63749	AnAge	1500	3.17609	AnAge	0.017215	19	8
Alpaca	Vicugna pacos	Cetartiodactyla	GCF_000164845.2	24617	7263804	2172207521	9.3369	62000	4.79239	AnAge	777	2.89042	AnAge	0.0188372	17	7
Egyptian rousette	Rousettus aegyptiacus	Chiroptera	GCF_001466805.2	1488988	2007187	1910233862	9.28109	134	2.1271	Pantheria	1825	3.26126	Pacifici et al. 2013	0.0530447	27	34
Black flying fox	Pteropus alecto	Chiroptera	GCF_000325575.1	31841	15954802	1985975446	9.29797	610.13	2.78542	Pantheria	2945.92	3.46922	Pacifici et al. 2013	0.00822116	13	21
Large flying fox	Pteropus vampyrus	Chiroptera	GCF_000151845.1	21866	5954017	2198284804	9.34208	1027.54	3.0118	Pantheria	2945.92	3.46922	Pacifici et al. 2013	0.00851912	9	22
Straw-colored fruit bat	Eidolon helvum	Chiroptera	GCA_000465285.1	12668	27684	1837754460	9.26429	254.61	2.40588	Pantheria	1825	3.26126	Pacifici et al. 2013	0.0425634	15	15
Great roundleaf bat	Hipposideros armiger	Chiroptera	GCF_001890085.1	39863	2328177	2236581172	9.34958	49.99	1.69888	Pantheria	1834.23	3.26345	Pacifici et al. 2013	0.0754337	15	10
Common vampire bat	Desmodus rotundus	Chiroptera	GCA_002940915.2	80250	26869735	2063791738	9.31467	33.16	1.52061	Pantheria	2779.8	3.44401	Pacifici et al. 2013	0.100519	55	50
Chinese rufous horseshoe bat	Rhinolophus sinicus	Chiroptera	GCF_001888835.1	37803	3754400	2073344508	9.31667	11.1495	1.04726	Pacifici et al. 2013	2726.54	3.43561	Pacifici et al. 2013	0.0298603	5	10
Greater horseshoe bat	Rhinolophus ferrumequinum	Chiroptera	GCA_000465495.1	11659	26674	1926439238	9.28476	22.59	1.35392	Pantheria	3285	3.51654	Pacifici et al. 2013	0.0291157	3	11
Parnell's mustached bat	Pteronotus parnellii	Chiroptera	GCA_000465405.1	58483	22675	1960317893	9.29233	19.59	1.29203	Pantheria	1888.07	3.27602	Pacifici et al. 2013	0.0877948	26	28
Indian false vampire	Megaderma lyra	Chiroptera	GCA_000465345.1	7043	16881	1735931796	9.23953	39.27	1.59406	Pantheria	1985.8	3.29794	Pacifici et al. 2013	0.13552	75	29
David's myotis	Myotis davidii	Chiroptera	GCF_000327345.1	15182	3454484	2059799708	9.31382	9.59717	0.982143	Pacifici et al. 2013	2106.63	3.32359	Pacifici et al. 2013	0.0317042	34	76
Brandt's bat	Myotis brandtii	Chiroptera	GCF_000412655.1	23289	3225832	2107242811	9.32371	5.3	0.724276	Pantheria	2106.63	3.32359	Pacifici et al. 2013	0.0117181	12	78
Little brown bat	Myotis lucifugus	Chiroptera	GCF_000147115.1	64330	4293315	2034575300	9.30847	7.8	0.892095	Pantheria	4117.2	3.6146	Pacifici et al. 2013	0.0149631	25	69
Big brown bat	Eptesicus fuscus	Chiroptera	GCF_000308155.1	21392	13454942	2026629342	9.30677	17.49	1.24279	Pantheria	2400.94	3.38038	Pacifici et al. 2013	0.0458505	61	85
Natal long-fingered bat	Miniopterus natalensis	Chiroptera	GCF_001595765.1	29777	4315193	1803099001	9.25602	10.43	1.01828	Pantheria	1995.7	3.30009	Pacifici et al. 2013	0.107417	140	72
Western European hedgehog	Erinaceus europaeus	Eulipotyphla	GCF_000296755.1	21359	3264618	2715720925	9.43389	777.95	2.89095	Pantheria	1608.52	3.20643	Pacifici et al. 2013	0.292051	94	18
Hispaniolan solenodon	Solenodon paradoxus	Eulipotyphla	GCA_002901085.1	89121	110915	2049415269	9.31163	899.99	2.95424	Pantheria	1901.92	3.27919	Pacifici et al. 2013	0.220825	19	6
European shrew	Sorex araneus	Eulipotyphla	GCF_000181275.1	22623	22794405	2423158183	9.38438	8.4	0.924279	Pantheria	524.782	2.53403	Pacifici et al. 2014	0.351681	58	28
Star-nosed mole	Condylura cristata	Eulipotyphla	GCF_000260355.1	46163	55520359	1769662895	9.24789	48.15	1.6826	Pantheria	558.641	2.74713	Pacifici et al. 2013	0.228774	11	6
Horse	Equus caballus	Perissodactyla	GCA_000002305.1	1502753	87230776	2474912402	9.39356	300000	5.47712	AnAge	1251	3.09726	AnAge	0.00265293	0	5
Przewalski's horse	Equus przewalskii	Perissodactyla	GCF_000696695.1	57610	513800	2395954271	9.37948	NA	NA	NA	NA	NA	NA	0.00189022	1	5
Ass	Equus asinus	Perissodactyla	GCF_001305755.1	66737	3776412	2391034547	9.37859	164998	5.21748	AnAge	1067	3.02816	AnAge	0.00761359	5	5
Sumatran rhinoceros	Dicerorhinus sumatrensis	Perissodactyla	GCA_002844835.1	89455	614498	2949863658	9.4698	1046156	6.0196	Pantheria	7300	3.86332	Pacifici et al. 2013	0.0202221	9	5
Southern white rhinoceros	Ceratotherium simum simum	Perissodactyla	GCF_000283155.1	92960	26277727	2464367180	9.39171	2285939	6.35906	Pantheria	6865.35	3.83666	Pacifici et al. 2013	0.0193983	13	6
Malayan pangolin	Manis javanica	Pholidota	GCF_001685135.1	38922	204728	2547379330	9.40609	4861.71	3.68679	Pantheria	1825	3.26126	Pacifici et al. 2013	0.0235769	10	4
Chinese pangolin	Manis pentadactyla	Pholidota	GCA_000738955.1	28718	117920	2204732179	9.34336	4675	3.66978	Pantheria	1825	3.26126	Pacifici et al. 2013	0.0212586	14	5

## Sheet: S2
Supplemental Table S2: Avian species and the correspomding data analyzed in this study.
Please note: The number of fast-evolving UCEs in a single species may not always be greater than the number of gBGC-induced fast-evolving UCEs in the same species due to their different backgrounds. Both lineage-specific and species-specific fast-evolving UCEs were taken into consideration when calculating gBGC-induced fast-evolving UCEs for each species.
Common name	Scientific name	Classification (order)	Assembly ID	Contig N50	Scaffold N50	Assembly size (AS)	log10(AS)	Body mass (g)	log10(BM)	Sources (BM)	Generation length (day)	log10(GL)	Sources (GL)	Genome-wide neutral substitution rate	Fast-evolving UCEs (our tree)	Fast-evolving UCEs (reference tree)	gBGC-induced fast-evolving UCEs (our tree)	gBGC-induced fast-evolving UCEs (reference tree)
Adelie penguin	Pygoscelis adeliae	Sphenisciformes	GCF_000699105.1	22195	5118896	1216617519	9.08515	4847.67	3.68553	AVONET	4683.69	3.67059	Bird et al. 2020	0.0167252	3	3	0	0
African ostrich	Struthio camelus	Struthioniformes	GCF_000698965.1	34997	3593425	1225041896	9.08815	111000	5.04532	AVONET	5323.32	3.72618	Bird et al. 2020	/	/	/	/	/
American crow	Corvus brachyrhynchos	Passeriformes	GCF_000691975.1	29093	6953989	1091312783	9.03795	448.8	2.65205	AVONET	2917.65	3.46503	Bird et al. 2020	0.00157098	30	30	39	40
American flamingo	Phoenicopterus ruber	Phoenicopteriformes	GCA_000687265.1	20262	38071	1132184511	9.05392	3031.59	3.48167	AVONET	4733.74	3.6752	Bird et al. 2020	0.0390261	7	8	2	2
Anna's hummingbird	Calypte anna	Apodiformes	GCF_000699085.1	26738	4052191	1105676412	9.04363	4.24	0.627366	AVONET	759.083	2.88029	Bird et al. 2020	0.145861	25	22	8	8
Band-tailed pigeon	Patagioenas fasciata	Columbiformes	GCA_002029285.1	17937	19987418	1089149042	9.03709	366.3	2.56384	AVONET	1603.86	3.20517	Bird et al. 2020	0.0305652	16	17	25	28
Barn owl	Tyto alba	Strigiformes	GCF_000687205.1	17226	52818	1120143088	9.04927	403.32	2.60565	AVONET	2122.79	3.32691	Bird et al. 2020	0.0714161	4	4	0	0
Bar-tailed godwit	Limosa lapponica	Charadriiformes	GCA_002844005.1	21257	283007	1034771378	9.01484	291.65	2.46486	AVONET	3078.57	3.48835	Bird et al. 2020	0.0289022	18	19	6	6
Bar-tailed trogon	Apaloderma vittatum	Trogoniformes	GCF_000703405.1	28882	56673	1070836417	9.02972	55	1.74036	AVONET	1332.03	3.12451	Bird et al. 2020	0.139718	9	8	2	2
Black grouse	Lyrurus tetrix	Galliformes	GCA_000586395.1	1029	NA	657025294	8.81758	1068.66	3.02884	AVONET	1231.84	3.09055	Bird et al. 2020	0.0145068	13	13	16	16
Blue-crowned manakin	Lepidothrix coronata	Passeriformes	GCA_001604755.1	141849	4972619	1079577334	9.03325	8.34	0.921166	AVONET	802.98	2.9047	Bird et al. 2020	0.0124983	17	13	38	41
Blue-fronted amazon	Amazona aestiva	Psittaciformes	GCA_001420675.1	26171	1281105	1129535839	9.0529	451	2.65418	AVONET	5419.2	3.73394	Bird et al. 2020	0.00463661	7	11	23	22
Brown roatelo	Mesitornis unicolor	Mesitornithiformes	GCF_000695765.1	47102	22740	1087290853	9.03635	148	2.17026	AVONET	1902.48	3.27932	Bird et al. 2020	0.124859	63	58	20	22
Budgerigar	Melopsittacus undulatus	Psittaciformes	GCF_000238935.1	55633	10614383	1117355426	9.04819	28.99	1.46225	AVONET	1406.04	3.148	Bird et al. 2020	0.0415767	17	17	19	18
Carmine bee-eater	Merops nubicus	Coraciiformes	GCF_000691845.1	24675	48089	1062961556	9.02652	42.4	1.62737	AVONET	1233.56	3.09116	Bird et al. 2020	0.152584	35	34	16	16
Chicken	Gallus gallus	Galliformes	GCF_000002315.5	17655422	20785086	1065348650	9.02749	751.72	2.87606	AVONET	1928.15	3.28514	Bird et al. 2020	0.023056	6	11	46	46
Chimney swift	Chaetura pelagica	Apodiformes	GCA_000747805.1	30757	3841852	1119188094	9.0489	23.6	1.37291	AVONET	1098.43	3.04077	Bird et al. 2020	0.11236	36	41	9	9
Chinese bamboo-partridge	Bambusicola thoracicus	Galliformes	GCA_002909625.1	10597	13160	1032295167	9.0138	264.79	2.4229	AVONET	1198.53	3.07865	Bird et al. 2020	0.0311437	59	64	71	72
Chuck-will's-widow	Antrostomus carolinensis	Caprimulgiformes	GCF_000700745.1	22156	46345	1119683066	9.0491	109	2.03743	AVONET	1480.32	3.17036	Bird et al. 2020	0.0910107	25	28	3	3
Collared flycatcher	Ficedula albicollis	Passeriformes	GCF_000247815.1	410964	6542656	1118343587	9.04858	12.69	1.10346	AVONET	839.567	2.92406	Bird et al. 2020	0.0220954	21	34	39	39
Common canary	Serinus canaria	Passeriformes	GCF_000534875.1	53884	17815079	1152083301	9.06148	24.3	1.38561	AVONET	1594.18	3.20254	Bird et al. 2020	0.0411906	40	37	55	55
Common cuckoo	Cuculus canorus	Cuculiformes	GCF_000709325.1	38137	2989832	1153894225	9.06217	111.36	2.04673	AVONET	1006.11	3.00265	Bird et al. 2020	0.142623	29	38	7	8
Common starling	Sturnus vulgaris	Passeriformes	GCA_001447265.1	151865	3416708	1036755994	9.01568	77.14	1.88728	AVONET	2062.61	3.31442	Bird et al. 2020	0.0110301	20	22	38	40
Crested ibis	Nipponia nippon	Pelecaniformes	GCF_000708225.1	29116	5211696	1223863029	9.08773	1900	3.27875	AVONET	2696.91	3.43087	Bird et al. 2020	0.052851	8	6	1	2
Cuckoo roller	Leptosomus discolor	Leptosomiformes	GCF_000691785.1	24735	62640	1136244952	9.05547	255	2.40654	AVONET	1512.34	3.17965	Bird et al. 2020	0.0876418	6	6	2	1
Dalmatian pelican	Pelecanus crispus	Pelecaniformes	GCF_000687375.1	21679	43364	1160924693	9.0648	9512.09	3.97828	AVONET	4831.15	3.68405	Bird et al. 2020	0.0539816	5	5	0	1
Double-crested cormorant	Nannopterum auritus	Pelecaniformes	GCA_002173455.1	97559	1990987	1246050644	9.09554	1806.49	3.25684	AVONET	2635.12	3.4208	Bird et al. 2020	0.0025689	0	3	1	2
Downy woodpecker	Picoides pubescens	Piciformes	GCF_000699005.1	24809	2093929	1167323935	9.06719	25.55	1.40739	AVONET	377	2.57634	Bird et al. 2020	0.199895	208	204	74	73
Duck	Anas zonorhyncha	Anseriformes	GCA_002224875.1	33496	2077029	1310797575	9.11754	1156	3.06296	AVONET	1455.09	3.16289	Bird et al. 2020	0.00452164	11	6	3	3
Emperor penguin	Aptenodytes forsteri	Sphenisciformes	GCF_000699145.1	31730	5071598	1254347440	9.09842	33569.3	4.52594	AVONET	5986.54	3.77718	Bird et al. 2020	0.0132224	15	15	0	0
Galapagos flightless cormorant	Nannopterum harrisi	Pelecaniformes	GCA_002173475.1	100243	4648443	1202994831	9.08026	3016.62	3.47952	AVONET	2694.65	3.4305	Bird et al. 2020	0.0049916	1	1	1	2
Golden eagle	Aquila chrysaetos	Accipitriformes	GCF_000766835.1	172329	9230743	1192725744	9.07654	4247.97	3.62818	AVONET	5933.17	3.77329	Bird et al. 2020	0.0152715	2	2	0	0
Golden-collared manakin	Manacus vitellinus	Passeriformes	GCF_001715985.1	185610	16644750	1213420527	9.08401	18.16	1.25912	AVONET	899.371	2.95394	Bird et al. 2020	0.0150568	8	8	33	36
Great cormorant	Phalacrocorax carbo	Pelecaniformes	GCF_000708925.1	17343	48427	1138967842	9.05651	2528.97	3.40294	AVONET	3179.37	3.50234	Bird et al. 2020	0.00739474	7	12	0	0
Great crested grebe	Podiceps cristatus	Podicipediformes	GCA_000699545.1	17412	30087	1134922578	9.05497	730.96	2.86389	AVONET	1988.73	3.29858	Bird et al. 2020	0.0709311	4	2	0	0
Great tit	Parus major	Passeriformes	GCA_001522545.2	148693	71365269	1020310768	9.00873	16.25	1.21085	AVONET	1113.14	3.04655	Bird et al. 2020	0.0150116	8	8	37	37
Greater prairie chicken	Tympanuchus cupido	Galliformes	GCA_001870855.1	47484	12138678	983776544	8.9929	870.08	2.93956	AVONET	961.368	2.98289	Bird et al. 2020	0.0181413	17	24	38	38
Greenish warbler	Phylloscopus trochiloides	Passeriformes	GCA_001655095.1	11055	20629	1003330590	9.00144	8.05	0.905796	AVONET	624.412	2.79547	Bird et al. 2020	0.00390228	12	4	62	62
Grey crowned-crane	Balearica regulorum	Gruiformes	GCF_000709895.1	23331	52178	1127622302	9.05216	3771.99	3.57657	AVONET	3377.04	3.52854	Bird et al. 2020	0.0217232	3	4	0	0
Helmeted guineafowl	Numida meleagris	Galliformes	GCA_002078875.2	234926	7868035	1043264150	9.01839	1299	3.11361	AVONET	979.031	2.9908	Bird et al. 2020	0.055619	13	12	35	35
Hoatzin	Opisthocomus hoazin	Opisthocomiformes	GCF_000692075.1	28179	2937227	1203712246	9.08052	696	2.84261	AVONET	2274.74	3.35693	Bird et al. 2020	0.0964417	40	49	19	23
Hooded crow	Corvus cornix	Passeriformes	GCF_000738735.2	97330	21080102	1042281180	9.01798	570	2.75587	AVONET	2088.81	3.3199	Bird et al. 2020	0.00184357	7	9	37	38
House sparrow	Passer domesticus	Passeriformes	GCA_001700915.1	51426	6373860	1042720703	9.01817	26.51	1.42341	AVONET	1360.12	3.13358	Bird et al. 2020	0.0458943	27	25	44	45
Japanese quail	Coturnix japonica	Galliformes	GCF_001577835.1	511217	2975000	927656957	8.96739	94.78	1.97672	AVONET	790.897	2.89812	Bird et al. 2020	0.0802466	68	67	39	39
Javan myna	Acridotheres javanicus	Passeriformes	GCA_002849675.1	144184	5538430	1051582182	9.02184	93.5	1.97081	AVONET	1015.37	3.00663	Bird et al. 2020	0.0110567	12	11	43	45
Kea	Nestor notabilis	Psittaciformes	GCF_000696875.1	26546	61475	1053559886	9.02266	862.97	2.936	AVONET	2874.83	3.45861	Bird et al. 2020	0.0518407	10	10	14	14
Killdeer	Charadrius vociferus	Charadriiformes	GCF_000708025.1	39278	3657050	1219859583	9.08631	96.44	1.98426	AVONET	1432.27	3.15603	Bird et al. 2020	0.0637655	5	5	1	1
Little egret	Egretta garzetta	Pelecaniformes	GCF_000687185.1	29019	3067157	1206501934	9.08153	312	2.49415	AVONET	1548.78	3.18999	Bird et al. 2020	0.0689662	21	21	9	9
Macqueen's bustard	Chlamydotis macqueenii	Otidiformes	GCF_000695195.1	21641	45221	1086566339	9.03606	1501.33	3.17648	AVONET	1969.48	3.29435	Bird et al. 2020	0.093669	46	47	23	24
Mallard	Anas platyrhynchos	Anseriformes	GCF_000355885.1	26114	1233631	1105035747	9.04338	843.42	2.92604	AVONET	1745.07	3.24181	Bird et al. 2020	0.00466107	10	10	2	2
Medium ground-finch	Geospiza fortis	Passeriformes	GCF_000277835.1	30521	5255844	1065292181	9.02747	24	1.38021	AVONET	1122.02	3.05	Bird et al. 2020	0.0209213	14	18	49	49
Neotropic cormorant	Nannopterum brasilianus	Pelecaniformes	GCA_002174335.1	35201	86910	1346185690	9.1291	1239.29	3.09317	AVONET	1994.6	3.29986	Bird et al. 2020	0.00242782	1	2	1	2
Northern bobwhite	Colinus virginianus	Galliformes	GCA_000599465.2	56067	2042136	1254146751	9.09835	171.89	2.23525	AVONET	824.438	2.91616	Bird et al. 2020	0.0147669	15	15	47	47
Northern fulmar	Fulmarus glacialis	Procellariiformes	GCF_000690835.1	25926	47208	1141395646	9.05744	611.94	2.78671	AVONET	9249.62	3.96612	Bird et al. 2020	0.0440265	8	9	0	0
Okinawa rail	Gallirallus okinawae	Gruiformes	GCA_002003005.1	6245	NA	1114530436	9.04709	433	2.63649	AVONET	1918.04	3.28286	Bird et al. 2020	0.130527	21	19	8	7
Oriental stork	Ciconia boyciana	Pelecaniformes	GCA_002002965.1	11009	13257	1364945554	9.13512	4847.74	3.68554	AVONET	4417.84	3.64521	Bird et al. 2020	0.0504045	281	272	1	3
Peach-faced lovebird	Agapornis roseicollis	Psittaciformes	GCA_002631895.1	28585	118346	1121789902	9.04991	53.83	1.73102	AVONET	1113.13	3.04655	Bird et al. 2020	0.044901	18	23	23	24
Pelagic cormorant	Urile pelagicus	Pelecaniformes	GCA_002173435.1	67731	1719903	1210663266	9.08302	1843.95	3.26575	AVONET	2608.86	3.41645	Bird et al. 2020	0.00718648	5	4	1	2
Peregrine falcon	Falco peregrinus	Falconiformes	GCF_000337955.1	28645	3935757	1171955363	9.06891	759.95	2.88079	AVONET	2085.01	3.31911	Bird et al. 2020	0.00235509	11	13	1	1
Pink-footed goose	Anser brachyrhynchus	Anseriformes	GCA_002592135.1	97462	4974386	1116992394	9.04805	2642.04	3.42194	AVONET	4260.31	3.62944	Bird et al. 2020	0.00393091	18	12	4	4
Puerto rican parrot	Amazona vittata	Psittaciformes	GCA_000332375.1	6904	19239	1175404042	9.07019	279.28	2.44604	AVONET	4853.65	3.68607	Bird et al. 2020	0.00765247	11	16	22	24
Red-crested turaco	Tauraco erythrolophus	Musophagiformes	GCF_000709365.1	56334	22885	1155540733	9.06279	261.24	2.41704	AVONET	1747.33	3.24238	Bird et al. 2020	0.0923033	16	17	6	6
Red-crowned crane	Grus japonensis	Gruiformes	GCA_002002985.1	8228	8606	1265634512	9.10231	8785.99	3.94379	AVONET	4580.78	3.66094	Bird et al. 2020	0.0208458	65	67	1	1
Red-legged seriema	Cariama cristata	Cariamiformes	GCF_000690535.1	24645	55197	1132245425	9.05394	1400	3.14613	AVONET	2765.09	3.44171	Bird et al. 2020	0.072829	8	7	3	3
Red-throated loon	Gavia stellata	Gaviiformes	GCF_000690875.1	24321	45523	1129694867	9.05296	1486	3.17202	AVONET	2987.73	3.47534	Bird et al. 2020	0.0569464	6	6	0	0
Rhinoceros hornbill	Buceros rhinoceros	Bucerotiformes	GCF_000710305.1	14587	53203	1065782791	9.02767	2371.58	3.37504	AVONET	4309.01	3.63438	Bird et al. 2020	0.129674	51	47	22	21
Rifleman	Acanthisitta chloris	Passeriformes	GCF_000695815.1	20602	64469	1035876403	9.01531	6.91	0.839478	AVONET	690.083	2.8389	Bird et al. 2020	0.120237	102	104	39	40
Rock pigeon	Columba livia	Columbiformes	GCF_000337935.1	26579	3148738	1107989085	9.04454	354.2	2.54925	AVONET	1457.48	3.1636	Bird et al. 2020	0.0295566	7	8	21	25
Rose-ringed parakeet	Psittacula krameri	Psittaciformes	GCA_002870145.1	23132	1191622	1417809960	9.15162	116.11	2.06487	AVONET	3765.06	3.57577	Bird et al. 2020	0.034528	24	28	22	21
Ruff	Calidris pugnax	Charadriiformes	GCF_001431845.1	109237	10060041	1229094286	9.08959	131.68	2.11952	AVONET	1896.21	3.27789	Bird et al. 2020	0.0523273	11	11	7	6
Saker falcon	Falco cherrug	Falconiformes	GCF_000337975.1	31327	4154532	1174811715	9.06997	961.21	2.98282	AVONET	1896.43	3.27794	Bird et al. 2020	0.00230946	6	5	1	1
Scaled quail	Callipepla squamata	Galliformes	GCA_002218305.1	154132	1035259	1045281893	9.01923	183.86	2.26449	AVONET	785.796	2.89531	Bird et al. 2020	0.0144823	21	21	45	45
Scarlet macaw	Ara macao	Psittaciformes	GCA_000400695.1	4399	15974	1204700227	9.08088	1015	3.00647	AVONET	4148.3	3.61787	Bird et al. 2020	0.0293984	54	60	18	19
Siberian stonechat	Saxicola maurus	Passeriformes	GCA_900205225.1	96283	10035936	1020367763	9.00876	12.6	1.10037	AVONET	798.639	2.90235	Bird et al. 2020 (average GL from relatives)	0.0285895	38	50	37	39
Silver-eye	Zosterops lateralis	Passeriformes	GCA_001281735.1	34514	3581248	1036003386	9.01536	12.68	1.10312	AVONET	1287.25	3.10966	Bird et al. 2020	0.0664842	28	23	40	40
Speckled mousebird	Colius striatus	Coliiformes	GCF_000690715.1	25860	46063	1075931597	9.03178	51.1	1.70842	AVONET	1254.84	3.09859	Bird et al. 2020	0.159683	41	19	12	5
Spotted owl	Strix occidentalis	Strigiformes	GCA_002372975.1	159062	3983020	1255541132	9.09883	586.37	2.76817	AVONET	2428.09	3.38527	Bird et al. 2020	0.0576846	2	2	1	1
Sunbittern	Eurypyga helias	Eurypygiformes	GCF_000690775.1	24402	47243	1088019637	9.03664	210	2.32222	AVONET	1855.68	3.2685	Bird et al. 2020	0.129554	44	39	17	15
Swan goose	Anser cygnoides	Anseriformes	GCF_000971095.1	27602	5202740	1119134887	9.04888	3511.94	3.54555	AVONET	3441.37	3.53673	Bird et al. 2020	0.00350518	6	17	3	3
Tawny-bellied seedeater	Sporophila hypoxantha	Passeriformes	GCA_002167245.1	1043501	7965281	1067760248	9.02847	10.5	1.02119	AVONET	756.624	2.87888	Bird et al. 2020	0.0201241	28	28	46	46
Thick-billed guillemot	Uria lomvia	Charadriiformes	GCA_002289315.1	24899	15847591	1179358714	9.07165	963.99	2.98407	AVONET	4720.55	3.67399	Bird et al. 2020	0.0561331	10	8	0	0
Tibetan ground-tit	Pseudopodoces humilis	Passeriformes	GCF_000331425.1	165265	16337386	1042997632	9.01828	45.4	1.65706	AVONET	951.849	2.97857	Bird et al. 2020	0.0133244	8	5	40	41
Turkey	Meleagris gallopavo	Galliformes	GCF_000146605.2	26671	3801642	1128339136	9.05244	5791.37	3.76278	AVONET	1711.77	3.23345	Bird et al. 2020	0.0318381	13	16	31	31
Turkey vulture	Cathartes aura	Accipitriformes	GCA_000699945.1	15248	36359	1152571117	9.06167	1518.24	3.18134	AVONET	2483.9	3.39513	Bird et al. 2020	0.0407782	13	14	1	1
Two-barred warbler	Phylloscopus plumbeitarsus	Passeriformes	GCA_001655115.1	5094	7450	997399373	8.99887	8.6	0.934498	AVONET	712.763	2.85295	Bird et al. 2020	0.00387071	4	7	62	61
White-rumped munia	Lonchura striata	Passeriformes	GCF_002197715.1	100439	2953339	1060169204	9.02538	12.3	1.08991	AVONET	782.657	2.89357	Bird et al. 2020	0.0221276	12	15	45	46
White-tailed eagle	Haliaeetus albicilla	Accipitriformes	GCF_000691405.1	25143	57319	1133549865	9.05444	4729.27	3.67479	AVONET	5274.7	3.7222	Bird et al. 2020	0.0194311	7	8	0	0
White-tailed tropicbird	Phaethon lepturus	Phaethontiformes	GCA_000687285.1	22941	47896	1152958507	9.06181	328.04	2.51593	AVONET	2981.46	3.47443	Bird et al. 2020	0.0736771	20	21	5	5
White-throated sparrow	Zonotrichia albicollis	Passeriformes	GCF_000385455.1	112748	4866725	1052600561	9.02226	24.4	1.38739	AVONET	1087.03	3.03624	Bird et al. 2020	0.0422134	17	17	48	49
Willow flycatcher	Empidonax traillii	Passeriformes	GCA_003031625.1	86564	895074	1123485537	9.05057	13.39	1.12678	AVONET	891.371	2.95006	Bird et al. 2020	0.0622134	30	30	44	44
Willow warbler	Phylloscopus trochilus	Passeriformes	GCA_002305835.1	388702	3249743	1066518484	9.02797	8.7	0.939519	AVONET	922.735	2.96508	Bird et al. 2020	0.0333377	21	23	55	56
Yellow-rumped warbler	Setophaga coronata	Passeriformes	GCA_001746935.1	10785	5523077	1171929618	9.0689	11.94	1.077	AVONET	830.456	2.91932	Bird et al. 2020	0.0326402	26	26	49	50
Yellow-throated sandgrouse	Pterocles gutturalis	Pteroclidiformes	GCF_000699245.1	26448	49530	1069324295	9.02911	338	2.52892	AVONET	1410.45	3.14936	Bird et al. 2020	0.094433	21	26	5	5
Zebra finch	Taeniopygia guttata	Passeriformes	GCF_000151805.1	38639	8236790	1232118738	9.09065	12.04	1.08063	AVONET	573.238	2.75834	Bird et al. 2020	0.0201832	34	46	39	39

## Sheet: S3
Supplemental Table S3: Genomic coordinates of mammalian UCEs.
Ancestor location	Length (based on ancestor locatio)	Goat location	Human location	Name
NW_004498495.1:407864-408068	205	3:80220339-80220536	NC_000001.11:103101846-103102048	mUCE.0001
NW_004483613.1:190734-190989	256	16:41571379-41571633	NC_000001.11:10513817-10514071	mUCE.0002
NW_004483613.1:167880-168092	213	16:41546390-41546599	NC_000001.11:10538869-10539079	mUCE.0003
NW_004483613.1:82352-82840	489	16:41495754-41496245	NC_000001.11:10593709-10594195	mUCE.0004
NW_004483613.1:11706-11950	245	16:41430002-41430245	NC_000001.11:10660653-10660896	mUCE.0005
NW_004500632.1:2152069-2152296	228	16:41420689-41420915	NC_000001.11:10672229-10672454	mUCE.0006
NW_004500632.1:2151666-2152035	370	16:41420289-41420657	NC_000001.11:10672486-10672854	mUCE.0007
NW_004500632.1:2151113-2151342	230	16:41419755-41419981	NC_000001.11:10673160-10673385	mUCE.0008
NW_004500632.1:2133652-2133861	210	16:41401337-41401542	NC_000001.11:10691107-10691312	mUCE.0009
NW_004500632.1:2125556-2125923	368	16:41394008-41394373	NC_000001.11:10698193-10698559	mUCE.0010
NW_004500632.1:2090938-2091263	326	16:41357748-41358070	NC_000001.11:10734341-10734666	mUCE.0011
NW_004500632.1:2090270-2090576	307	16:41357094-41357399	NC_000001.11:10735022-10735327	mUCE.0012
NW_004498495.1:5524840-5525062	223	3:84631193-84631414	NC_000001.11:107421045-107421264	mUCE.0013
NW_004498495.1:5532766-5533045	280	3:84639372-84639648	NC_000001.11:107430707-107430985	mUCE.0014
NW_004498495.1:5738780-5738988	209	3:84837183-84837378	NC_000001.11:107602979-107603185	mUCE.0015
NW_004500632.1:1978614-1978847	234	16:41235632-41235870	NC_000001.11:10865295-10865529	mUCE.0016
NW_004500632.1:1942905-1943142	238	16:41202086-41202320	NC_000001.11:10905098-10905331	mUCE.0017
NW_004470946.1:146-521	376	16:41201530-41201904	NC_000001.11:10905505-10905879	mUCE.0018
NW_004500632.1:1941041-1941313	273	16:41199748-41200019	NC_000001.11:10907523-10907794	mUCE.0019
NW_004478304.1:99367-99571	205	3:87161566-87161768	NC_000001.11:110015374-110015577	mUCE.0020
NW_004486191.1:990499-990705	207	3:89671913-89672113	NC_000001.11:112355871-112356067	mUCE.0021
NW_004481249.1:2393156-2393390	235	3:91005910-91006143	NC_000001.11:113797842-113798072	mUCE.0022
NW_004481249.1:2186682-2186896	215	3:91198581-91198794	NC_000001.11:113977273-113977486	mUCE.0023
NW_004481249.1:1295637-1295898	262	3:92007060-92007318	NC_000001.11:114737389-114737647	mUCE.0024
NW_004482974.1:968545-968825	281	3:98474518-98474797	NC_000001.11:147574528-147574807	mUCE.0025
NW_004482974.1:1009367-1009673	307	3:98516095-98516400	NC_000001.11:147612860-147613164	mUCE.0026
NW_004467826.1:671258-671512	255	3:101068373-101068621	NC_000001.11:151698849-151699099	mUCE.0027
NW_004474898.1:8506-8775	270	3:104517390-104517656	NC_000001.11:154970015-154970282	mUCE.0028
NW_004501063.1:321822-322028	207	3:104826742-104826947	NC_000001.11:155335280-155335485	mUCE.0029
NW_004482762.1:794395-794654	260	3:115375090-115375348	NC_000001.11:164320715-164320973	mUCE.0030
NW_004481808.1:150914-151140	227	3:115686698-115686923	NC_000001.11:164559820-164560045	mUCE.0031
NW_004481808.1:210765-211002	238	3:115748468-115748701	NC_000001.11:164623732-164623968	mUCE.0032
NW_004481808.1:223181-223389	209	3:115761643-115761848	NC_000001.11:164635124-164635325	mUCE.0033
NW_004481808.1:223443-223659	217	3:115761914-115762121	NC_000001.11:164635373-164635586	mUCE.0034
NW_004481808.1:251942-252225	284	3:115793064-115793346	NC_000001.11:164668718-164669000	mUCE.0035
NW_004481808.1:252330-252573	244	3:115793452-115793693	NC_000001.11:164669106-164669347	mUCE.0036
NW_004481808.1:270866-271130	265	3:115813754-115814017	NC_000001.11:164689893-164690156	mUCE.0037
NW_004481808.1:287850-288282	433	3:115830803-115831232	NC_000001.11:164704122-164704550	mUCE.0038
NW_004481808.1:295117-295342	226	3:115837869-115838093	NC_000001.11:164712225-164712449	mUCE.0039
NW_004481808.1:339732-339973	242	3:115879692-115879924	NC_000001.11:164754316-164754554	mUCE.0040
NW_004481808.1:403364-403588	225	3:115947906-115948129	NC_000001.11:164819979-164820201	mUCE.0041
NW_004481808.1:866052-866349	298	3:116452502-116452798	NC_000001.11:165279886-165280182	mUCE.0042
NW_004481755.1:501357-501593	237	3:118814213-118814450	NC_000001.11:167426007-167426242	mUCE.0043
NW_004467662.1:87973-88237	265	16:36970255-36970518	NC_000001.11:170893794-170894057	mUCE.0044
NW_004473051.1:543283-543622	340	16:37602269-37602609	NC_000001.11:171589269-171589619	mUCE.0045
NW_004473051.1:545015-545234	220	16:37604045-37604260	NC_000001.11:171591063-171591275	mUCE.0046
NW_004473051.1:1170044-1170342	299	16:38134654-38134951	NC_000001.11:172144760-172145057	mUCE.0047
NW_004493399.1:515750-515950	201	16:57269335-57269534	NC_000001.11:177433963-177434162	mUCE.0048
NW_004483017.1:3180652-3180904	253	16:63180251-63180500	NC_000001.11:183517578-183517829	mUCE.0049
NW_004482504.1:27780-28075	296	2:2155942-2156235	NC_000001.11:18768758-18769051	mUCE.0050
NW_004497418.1:1120463-1120678	216	16:14163226-14163440	NC_000001.11:190097776-190097990	mUCE.0051
NW_004490575.1:1202184-1202398	215	16:75156179-75156391	NC_000001.11:197604287-197604500	mUCE.0052
NW_004490575.1:1199944-1200236	293	16:75158231-75158523	NC_000001.11:197606468-197606759	mUCE.0053
NW_004490575.1:1141516-1141744	229	16:75217061-75217287	NC_000001.11:197674285-197674512	mUCE.0054
NW_004490575.1:816047-816265	219	16:75453235-75453452	NC_000001.11:197931844-197932061	mUCE.0055
NW_004490575.1:416573-416811	239	16:75761476-75761712	NC_000001.11:198298712-198298949	mUCE.0056
NW_004479025.1:491135-491350	216	16:77593063-77593272	NC_000001.11:200247743-200247955	mUCE.0057
NW_004479025.1:324819-325081	263	16:77710918-77711178	NC_000001.11:200406742-200407002	mUCE.0058
NW_004480320.1:802083-802336	254	16:1169673-1169925	NC_000001.11:203996871-203997123	mUCE.0059
NW_004479948.1:1334765-1334969	205	2:4124020-4124223	NC_000001.11:20807179-20807382	mUCE.0060
NW_004483308.1:3118008-3118306	299	16:72837938-72838235	NC_000001.11:209102662-209102957	mUCE.0061
NW_004483452.1:560884-561116	233	16:69097791-69098020	NC_000001.11:213159490-213159719	mUCE.0062
NW_004483452.1:615848-616130	283	16:69035618-69035899	NC_000001.11:213233270-213233550	mUCE.0063
NW_004483452.1:623195-623503	309	16:69020108-69020415	NC_000001.11:213242221-213242528	mUCE.0064
NW_004483452.1:884073-884273	201	16:68774047-68774250	NC_000001.11:213472224-213472423	mUCE.0065
NW_004483452.1:980353-980633	281	16:68660139-68660418	NC_000001.11:213586322-213586601	mUCE.0066
NW_004483452.1:1172356-1172634	279	16:68451121-68451397	NC_000001.11:213793580-213793850	mUCE.0067
NW_004483452.1:1207022-1207299	278	16:68418882-68419158	NC_000001.11:213829961-213830237	mUCE.0068
NW_004483452.1:1281128-1281360	233	16:68340724-68340954	NC_000001.11:213892377-213892607	mUCE.0069
NW_004483452.1:1354392-1354633	242	16:68275452-68275692	NC_000001.11:213950441-213950681	mUCE.0070
NW_004483452.1:1398790-1399185	396	16:68225787-68226181	NC_000001.11:213996293-213996684	mUCE.0071
NW_004483452.1:1411186-1411423	238	16:68213587-68213822	NC_000001.11:214009033-214009268	mUCE.0072
NW_004483452.1:1411926-1412240	315	16:68212772-68213085	NC_000001.11:214009758-214010071	mUCE.0073
NW_004483452.1:1412242-1412460	219	16:68212552-68212769	NC_000001.11:214010074-214010291	mUCE.0074
NW_004483452.1:1419152-1419521	370	16:68204581-68204949	NC_000001.11:214017157-214017525	mUCE.0075
NW_004483452.1:3238118-3238323	206	16:17537815-17538019	NC_000001.11:215716213-215716417	mUCE.0076
NW_004483452.1:3264300-3264630	331	16:17574247-17574575	NC_000001.11:215749667-215749990	mUCE.0077
NW_004483452.1:3410861-3411123	263	16:17745436-17745696	NC_000001.11:215900831-215901091	mUCE.0078
NW_004483452.1:3493838-3494111	274	16:17811679-17811951	NC_000001.11:215963741-215964013	mUCE.0079
NW_004483452.1:3576794-3577245	452	16:17903964-17904411	NC_000001.11:216048104-216048551	mUCE.0080
NW_004483452.1:3633548-3633964	417	16:17962935-17963350	NC_000001.11:216090612-216091027	mUCE.0081
NW_004483452.1:3724405-3724630	226	16:18088337-18088560	NC_000001.11:216181696-216181920	mUCE.0082
NW_004483452.1:4122362-4122588	227	16:18437615-18437840	NC_000001.11:216504618-216504843	mUCE.0083
NW_004483452.1:4155849-4156105	257	16:18467549-18467805	NC_000001.11:216532139-216532394	mUCE.0084
NW_004483452.1:4184159-4184383	225	16:18499712-18499935	NC_000001.11:216560711-216560932	mUCE.0085
NW_004483452.1:4186771-4187068	298	16:18502356-18502651	NC_000001.11:216563216-216563511	mUCE.0086
NW_004483452.1:4397478-4397793	316	16:18718207-18718520	NC_000001.11:216757154-216757467	mUCE.0087
NW_004483452.1:4684149-4684443	295	16:19033524-19033817	NC_000001.11:217044894-217045187	mUCE.0088
NW_004480800.1:225716-225952	237	16:19569702-19569936	NC_000001.11:217539567-217539802	mUCE.0089
NW_004480800.1:259252-259514	263	16:19607973-19608234	NC_000001.11:217576635-217576896	mUCE.0090
NW_004480800.1:364612-364832	221	16:19706586-19706805	NC_000001.11:217668460-217668679	mUCE.0091
NW_004480800.1:364834-365087	254	16:19706808-19707060	NC_000001.11:217668682-217668935	mUCE.0092
NW_004480800.1:369717-369927	211	16:19723942-19724151	NC_000001.11:217678610-217678818	mUCE.0093
NW_004480800.1:428410-428649	240	16:19754271-19754509	NC_000001.11:217729034-217729272	mUCE.0094
NW_004480800.1:495133-495444	312	16:19810327-19810636	NC_000001.11:217780997-217781307	mUCE.0095
NW_004480800.1:672369-672611	243	16:19948576-19948819	NC_000001.11:217929432-217929673	mUCE.0096
NW_004480800.1:681919-682158	240	16:19959317-19959555	NC_000001.11:217940345-217940582	mUCE.0097
NW_004485466.1:984140-984347	208	NA	NC_000001.11:235181010-235181214	mUCE.0098
NW_004485466.1:1020777-1020978	202	28:37385709-37385907	NC_000001.11:235225294-235225495	mUCE.0099
NW_004481324.1:966918-967151	234	16:33223363-33223595	NC_000001.11:242288348-242288580	mUCE.0100
NW_004464023.1:739290-739519	230	16:31682845-31683073	NC_000001.11:244051055-244051280	mUCE.0101
NW_004464023.1:805064-805280	217	16:31595774-31595985	NC_000001.11:244121815-244122030	mUCE.0102
NW_004464023.1:864855-865236	382	16:31541806-31542185	NC_000001.11:244171661-244172040	mUCE.0103
NW_004464023.1:1590403-1590646	244	16:30953141-30953382	NC_000001.11:244853480-244853721	mUCE.0104
NW_004464023.1:1590993-1591230	238	16:30952564-30952798	NC_000001.11:244854062-244854300	mUCE.0105
NW_004482004.1:1089739-1090014	276	2:7657015-7657288	NC_000001.11:24646966-24647239	mUCE.0106
NW_004494502.1:398965-399219	255	2:9499579-9499832	NC_000001.11:26698132-26698385	mUCE.0107
NW_004494502.1:380605-380938	334	2:9516900-9517229	NC_000001.11:26723748-26724078	mUCE.0108
NW_004474636.1:1770590-1770807	218	2:10188223-10188435	NC_000001.11:27534391-27534607	mUCE.0109
NW_004474636.1:1736770-1737035	266	2:10221681-10221945	NC_000001.11:27571770-27572034	mUCE.0110
NW_004482091.1:318949-319201	253	2:13319342-13319589	NC_000001.11:30931487-30931738	mUCE.0111
NW_004482091.1:390220-390451	232	2:13377960-13378190	NC_000001.11:30995022-30995249	mUCE.0112
NW_004482091.1:402774-402977	204	2:13389145-13389347	NC_000001.11:31006944-31007146	mUCE.0113
NW_004483498.1:1876524-1876775	252	2:15391526-15391776	NC_000001.11:33368498-33368748	mUCE.0114
NW_004484012.1:1177229-1177507	279	3:10926659-10926935	NC_000001.11:35893554-35893831	mUCE.0115
NW_004484012.1:2094134-2094430	297	3:11730763-11731054	NC_000001.11:36795522-36795814	mUCE.0116
NW_004482384.1:335655-335934	280	3:12865513-12865791	NC_000001.11:38029265-38029543	mUCE.0117
NW_004482384.1:488689-488935	247	3:13028764-13029008	NC_000001.11:38191339-38191584	mUCE.0118
NW_004482384.1:623130-623426	297	3:13158707-13159002	NC_000001.11:38326867-38327162	mUCE.0119
NW_004482384.1:1062810-1063033	224	3:13635179-13635400	NC_000001.11:38813087-38813309	mUCE.0120
NW_004482384.1:1077043-1077583	541	3:13648101-13648640	NC_000001.11:38826151-38826689	mUCE.0121
NW_004466305.1:131829-132038	210	3:14302397-14302605	NC_000001.11:39563797-39564005	mUCE.0122
NW_004466305.1:138775-138988	214	3:14308887-14309100	NC_000001.11:39571157-39571365	mUCE.0123
NW_004481001.1:66976-67206	231	3:16161419-16161640	NC_000001.11:41524713-41524942	mUCE.0124
NW_004463360.1:80301-80654	354	3:18672194-18672542	NC_000001.11:43964042-43964391	mUCE.0125
NW_004480670.1:1303217-1303626	410	3:18982837-18983246	NC_000001.11:44261173-44261581	mUCE.0126
NW_004480670.1:1300493-1300719	227	3:18985560-18985784	NC_000001.11:44264095-44264319	mUCE.0127
NW_004480670.1:1290472-1290892	421	3:18995987-18996407	NC_000001.11:44274101-44274520	mUCE.0128
NW_004480670.1:1265339-1265550	212	3:19018687-19018883	NC_000001.11:44296147-44296348	mUCE.0129
NW_004480670.1:1152308-1152740	433	3:19131446-19131874	NC_000001.11:44409229-44409656	mUCE.0130
NW_004480670.1:1036846-1037046	201	3:19263769-19263964	NC_000001.11:44524163-44524362	mUCE.0131
NW_004480670.1:1027714-1027920	207	3:19275987-19276192	NC_000001.11:44536734-44536939	mUCE.0132
NW_004480670.1:1024313-1024571	259	3:19279598-19279855	NC_000001.11:44540478-44540734	mUCE.0133
NW_004480670.1:984169-984509	341	3:19307420-19307759	NC_000001.11:44569227-44569566	mUCE.0134
NW_004480670.1:934774-935139	366	3:19365838-19366201	NC_000001.11:44619354-44619717	mUCE.0135
NW_004481191.1:611663-611882	220	3:20966426-20966643	NC_000001.11:46303132-46303350	mUCE.0136
NW_004481191.1:466005-466227	223	3:21091816-21092037	NC_000001.11:46455941-46456160	mUCE.0137
NW_004458827.1:313564-313806	243	3:22125533-22125774	NC_000001.11:47578955-47579192	mUCE.0138
NW_004490764.1:885316-885525	210	3:24686653-24686862	NC_000001.11:50110774-50110971	mUCE.0139
NW_004490764.1:1471492-1471765	274	3:25195980-25196252	NC_000001.11:50610594-50610866	mUCE.0140
NW_004490764.1:1499300-1499602	303	3:25210963-25211264	NC_000001.11:50633488-50633789	mUCE.0141
NW_004490764.1:1573850-1574144	295	3:25262568-25262861	NC_000001.11:50699735-50700028	mUCE.0142
NW_004490764.1:1574146-1574403	258	3:25262864-25263123	NC_000001.11:50700031-50700284	mUCE.0143
NW_004490764.1:1574443-1574752	310	3:25263175-25263483	NC_000001.11:50700330-50700637	mUCE.0144
NW_004462724.1:69094-69340	247	3:28898123-28898365	NC_000001.11:54355931-54356173	mUCE.0145
NW_004462724.1:39232-39530	299	3:28928056-28928348	NC_000001.11:54387480-54387775	mUCE.0146
NW_004502067.1:88025-88409	385	3:35814745-35815126	NC_000001.11:60621327-60621709	mUCE.0147
NW_004462803.1:2558190-2558467	278	3:36052140-36052410	NC_000001.11:60895695-60895965	mUCE.0148
NW_004462803.1:2416373-2416598	226	3:36212342-36212566	NC_000001.11:61042507-61042731	mUCE.0149
NW_004462803.1:2353225-2353485	261	3:36282285-36282544	NC_000001.11:61110651-61110910	mUCE.0150
NW_004462803.1:2283161-2283453	293	3:36349866-36350157	NC_000001.11:61181101-61181392	mUCE.0151
NW_004462803.1:2238429-2238689	261	3:36394518-36394777	NC_000001.11:61220429-61220688	mUCE.0152
NW_004491265.1:986793-987103	311	3:36641734-36642035	NC_000001.11:61453150-61453459	mUCE.0153
NW_004491265.1:981466-981670	205	3:36646763-36646966	NC_000001.11:61458225-61458426	mUCE.0154
NW_004491265.1:977144-977472	329	3:36650969-36651293	NC_000001.11:61462465-61462789	mUCE.0155
NW_004462748.1:20022-20243	222	3:38186035-38186253	NC_000001.11:62882094-62882314	mUCE.0156
NW_004462748.1:22244-22619	376	3:38188181-38188555	NC_000001.11:62884254-62884628	mUCE.0157
NW_004462748.1:43565-44272	708	3:38211903-38212607	NC_000001.11:62903936-62904640	mUCE.0158
NW_004462748.1:63607-63951	345	3:38227198-38227540	NC_000001.11:62917150-62917493	mUCE.0159
NW_004462748.1:120409-120751	343	3:38286390-38286731	NC_000001.11:62978386-62978727	mUCE.0160
NW_004462748.1:120754-120982	229	3:38286735-38286962	NC_000001.11:62978731-62978958	mUCE.0161
NW_004462748.1:143796-144292	497	3:38307208-38307702	NC_000001.11:62997739-62998234	mUCE.0162
NW_004462748.1:154751-154963	213	3:38317583-38317794	NC_000001.11:63007995-63008206	mUCE.0163
NW_004462748.1:254717-254970	254	3:38425141-38425393	NC_000001.11:63112558-63112810	mUCE.0164
NW_004462748.1:394077-394339	263	3:38589038-38589299	NC_000001.11:63248355-63248616	mUCE.0165
NW_004462748.1:427488-427727	240	3:38616916-38617152	NC_000001.11:63274550-63274785	mUCE.0166
NW_004502328.1:995431-995727	297	3:40049619-40049914	NC_000001.11:64597167-64597462	mUCE.0167
NW_004502328.1:7050909-7051152	244	3:45761318-45761560	NC_000001.11:70028166-70028408	mUCE.0168
NW_004502328.1:7239647-7239922	276	3:45953378-45953652	NC_000001.11:70229141-70229413	mUCE.0169
NW_004502328.1:7241508-7241873	366	3:45955212-45955577	NC_000001.11:70230926-70231290	mUCE.0170
NW_004502328.1:7242495-7242710	216	3:45956298-45956513	NC_000001.11:70232009-70232222	mUCE.0171
NW_004502328.1:8117262-8117496	235	3:46726536-46726767	NC_000001.11:71066727-71066960	mUCE.0172
NW_004481649.1:2855972-2856174	203	3:47564871-47565072	NC_000001.11:71873899-71874097	mUCE.0173
NW_004497575.1:849253-849457	205	3:50951646-50951847	NC_000001.11:74778225-74778428	mUCE.0174
NW_004497575.1:866912-867159	248	3:50970144-50970390	NC_000001.11:74791376-74791622	mUCE.0175
NW_004485087.1:1545060-1545297	238	3:54161951-54162187	NC_000001.11:77633216-77633452	mUCE.0176
NW_004485087.1:1908303-1908531	229	3:54460271-54460498	NC_000001.11:77947385-77947612	mUCE.0177
NW_004485087.1:1929977-1930177	201	3:54483665-54483864	NC_000001.11:77968970-77969168	mUCE.0178
NW_004481235.1:702221-702487	267	3:58360302-58360566	NC_000001.11:81583864-81584128	mUCE.0179
NW_004481235.1:910947-911173	227	3:58558833-58559058	NC_000001.11:81793204-81793422	mUCE.0180
NW_004469368.1:171447-171692	246	3:58746464-58746708	NC_000001.11:81967981-81968225	mUCE.0181
NW_004469368.1:384743-384944	202	3:58941307-58941507	NC_000001.11:82141162-82141362	mUCE.0182
NW_004481705.1:446413-446684	272	3:59734465-59734735	NC_000001.11:82787057-82787326	mUCE.0183
NW_004481705.1:563973-564179	207	3:59846226-59846431	NC_000001.11:82880083-82880288	mUCE.0184
NW_004497963.1:605104-605313	210	3:62716567-62716774	NC_000001.11:85583518-85583724	mUCE.0185
NW_004497963.1:2273311-2273758	448	3:64385387-64385834	NC_000001.11:87204386-87204830	mUCE.0186
NW_004497963.1:2411380-2411610	231	3:64514602-64514831	NC_000001.11:87333088-87333314	mUCE.0187
NW_004497963.1:2416229-2416552	324	3:64519462-64519783	NC_000001.11:87337909-87338231	mUCE.0188
NW_004497963.1:2423341-2423582	242	3:64526653-64526893	NC_000001.11:87345145-87345383	mUCE.0189
NW_004497963.1:2435864-2436649	786	3:64538823-64539607	NC_000001.11:87356197-87356981	mUCE.0190
NW_004497963.1:2497311-2497557	247	3:64600818-64601063	NC_000001.11:87426222-87426467	mUCE.0191
NW_004497963.1:2631373-2631793	421	3:64739301-64739720	NC_000001.11:87563145-87563564	mUCE.0192
NW_004497963.1:2682993-2683368	376	3:64780492-64780866	NC_000001.11:87599781-87600154	mUCE.0193
NW_004497963.1:2683370-2683643	274	3:64780869-64781143	NC_000001.11:87600157-87600427	mUCE.0194
NW_004497963.1:2757496-2757762	267	3:64866528-64866790	NC_000001.11:87683507-87683769	mUCE.0195
NW_004497963.1:3080915-3081378	464	3:65159696-65160157	NC_000001.11:87937783-87938240	mUCE.0196
NW_004497963.1:3296397-3296771	375	3:65366970-65367343	NC_000001.11:88129828-88130200	mUCE.0197
NW_004497963.1:3359658-3359858	201	3:65428195-65428390	NC_000001.11:88179762-88179956	mUCE.0198
NW_004502201.1:235041-235422	382	3:65645535-65645915	NC_000001.11:88376480-88376860	mUCE.0199
NW_004502201.1:275003-275224	222	3:65683617-65683837	NC_000001.11:88410402-88410622	mUCE.0200
NW_004502201.1:275295-275545	251	3:65683909-65684158	NC_000001.11:88410694-88410943	mUCE.0201
NW_004502201.1:330015-330263	249	3:65736534-65736779	NC_000001.11:88472380-88472627	mUCE.0202
NW_004492890.1:806124-806666	543	3:67349923-67350464	NC_000001.11:90007289-90007830	mUCE.0203
NW_004492890.1:928803-929065	263	3:67444989-67445249	NC_000001.11:90101949-90102209	mUCE.0204
NW_004502096.1:187359-187652	294	3:67619413-67619705	NC_000001.11:90282391-90282683	mUCE.0205
NW_004502096.1:347900-348198	299	3:67728639-67728936	NC_000001.11:90387345-90387642	mUCE.0206
NW_004502096.1:505004-505400	397	3:67901654-67902048	NC_000001.11:90561858-90562245	mUCE.0207
NW_004502096.1:585989-586402	414	3:67956617-67957029	NC_000001.11:90622065-90622475	mUCE.0208
NW_004502096.1:586643-586914	272	3:67957271-67957541	NC_000001.11:90622714-90622984	mUCE.0209
NW_004502096.1:587233-587447	215	3:67957886-67958099	NC_000001.11:90623299-90623512	mUCE.0210
NW_004485327.1:140442-140664	223	3:68169703-68169924	NC_000001.11:90833788-90834010	mUCE.0211
NW_004485327.1:157598-157814	217	3:68187068-68187283	NC_000001.11:90851851-90852066	mUCE.0212
NW_004485327.1:268866-269131	266	3:68274169-68274434	NC_000001.11:90945510-90945774	mUCE.0213
NW_004483532.1:8247214-8247450	237	3:72533131-72533365	NC_000001.11:95513094-95513329	mUCE.0214
NW_004483532.1:7789439-7789639	201	3:72980674-72980873	NC_000001.11:95924083-95924282	mUCE.0215
NW_004483532.1:7640983-7641243	261	3:73073294-73073551	NC_000001.11:96008462-96008719	mUCE.0216
NW_004483532.1:7534578-7534906	329	3:73156506-73156833	NC_000001.11:96096285-96096612	mUCE.0217
NW_004483532.1:7457920-7458127	208	3:73223088-73223294	NC_000001.11:96164173-96164379	mUCE.0218
NW_004483532.1:6977991-6978303	313	3:73630092-73630404	NC_000001.11:96597223-96597534	mUCE.0219
NW_004483532.1:6420778-6421020	243	3:74200470-74200713	NC_000001.11:97120126-97120367	mUCE.0220
NW_004483532.1:6369612-6369876	265	3:74259546-74259809	NC_000001.11:97175912-97176175	mUCE.0221
NW_004483532.1:6050114-6050462	349	3:74542881-74543228	NC_000001.11:97451045-97451392	mUCE.0222
NW_004483532.1:5965057-5965273	217	3:74630738-74630953	NC_000001.11:97536724-97536938	mUCE.0223
NW_004483532.1:5944096-5944410	315	3:74652128-74652439	NC_000001.11:97559327-97559640	mUCE.0224
NW_004483532.1:5732816-5733030	215	3:74858029-74858242	NC_000001.11:97743267-97743475	mUCE.0225
NW_004483532.1:5615749-5616000	252	3:74966355-74966603	NC_000001.11:97837126-97837376	mUCE.0226
NW_004483532.1:5094183-5094430	248	3:75469621-75469864	NC_000001.11:98267451-98267697	mUCE.0227
NW_004496412.1:501347-501888	542	11:7841244-7841783	NC_000002.12:103445144-103445680	mUCE.0228
NW_004496412.1:906300-906737	438	11:8155073-8155510	NC_000002.12:103960171-103960607	mUCE.0229
NW_004496412.1:907323-907526	204	11:8156100-8156302	NC_000002.12:103961195-103961397	mUCE.0230
NW_004483484.1:151636-151920	285	11:8541484-8541751	NC_000002.12:104428867-104429149	mUCE.0231
NW_004483484.1:154376-154749	374	11:8544219-8544587	NC_000002.12:104431596-104431968	mUCE.0232
NW_004483484.1:154753-154969	217	11:8544597-8544812	NC_000002.12:104431973-104432189	mUCE.0233
NW_004483484.1:246189-246609	421	11:8623812-8624231	NC_000002.12:104516474-104516893	mUCE.0234
NW_004483484.1:430559-430919	361	11:8754535-8754893	NC_000002.12:104702546-104702905	mUCE.0235
NW_004483484.1:577628-577839	212	11:8882692-8882887	NC_000002.12:104862641-104862851	mUCE.0236
NW_004483484.1:754131-754440	310	11:8997295-8997600	NC_000002.12:105058098-105058404	mUCE.0237
NW_004483484.1:776799-777070	272	11:9009462-9009720	NC_000002.12:105081230-105081500	mUCE.0238
NW_004466121.1:95708-95908	201	NA	NC_000002.12:108958220-108958419	mUCE.0239
NW_004478928.1:168836-169078	243	2:66460955-66461196	NC_000002.12:118051919-118052160	mUCE.0240
NW_004478928.1:167403-167673	271	2:66459529-66459795	NC_000002.12:118053322-118053588	mUCE.0241
NW_004482290.1:566691-566935	245	2:66173042-66173285	NC_000002.12:118281125-118281368	mUCE.0242
NW_004482290.1:361493-361694	202	2:65942777-65942974	NC_000002.12:118498536-118498735	mUCE.0243
NW_004482290.1:315603-315814	212	2:65858662-65858870	NC_000002.12:118547193-118547401	mUCE.0244
NW_004482290.1:19160-19677	518	2:65529752-65530268	NC_000002.12:118849720-118850236	mUCE.0245
NW_004480350.1:300282-300513	232	2:131790141-131790371	NC_000002.12:127763006-127763236	mUCE.0246
NW_004496730.1:2751550-2751807	258	2:73904719-73904975	NC_000002.12:134945793-134946047	mUCE.0247
NW_004497268.1:331889-332090	202	2:82632622-82632822	NC_000002.12:143113498-143113698	mUCE.0248
NW_004497268.1:383829-384076	248	2:82690612-82690858	NC_000002.12:143159584-143159830	mUCE.0249
NW_004497268.1:534167-534476	310	2:82885224-82885532	NC_000002.12:143312505-143312813	mUCE.0250
NW_004497268.1:566208-566839	632	2:82921943-82922573	NC_000002.12:143347113-143347743	mUCE.0251
NW_004497268.1:574098-574409	312	2:82930607-82930917	NC_000002.12:143354878-143355186	mUCE.0252
NW_004497268.1:576195-576563	369	2:82932660-82933025	NC_000002.12:143356939-143357306	mUCE.0253
NW_004497268.1:598682-598890	209	2:82958649-82958855	NC_000002.12:143381440-143381647	mUCE.0254
NW_004497268.1:613972-614211	240	2:82977016-82977251	NC_000002.12:143398855-143399089	mUCE.0255
NW_004497268.1:616852-617245	394	2:82980200-82980592	NC_000002.12:143401868-143402259	mUCE.0256
NW_004497268.1:796336-796639	304	2:83171904-83172206	NC_000002.12:143573409-143573711	mUCE.0257
NW_004497268.1:851081-851316	236	2:83222755-83222989	NC_000002.12:143623995-143624226	mUCE.0258
NW_004497268.1:913764-914033	270	2:83279596-83279864	NC_000002.12:143679734-143680002	mUCE.0259
NW_004497268.1:917295-917513	219	2:83283120-83283336	NC_000002.12:143683321-143683538	mUCE.0260
NW_004497268.1:917545-917973	429	2:83283369-83283794	NC_000002.12:143683571-143683995	mUCE.0261
NW_004497268.1:919369-919944	576	2:83285204-83285766	NC_000002.12:143685384-143685947	mUCE.0262
NW_004497268.1:928242-928471	230	2:83294371-83294596	NC_000002.12:143694259-143694489	mUCE.0263
NW_004497268.1:1004362-1004621	260	2:83372872-83373129	NC_000002.12:143775588-143775846	mUCE.0264
NW_004497268.1:1068789-1069086	298	2:83435764-83436062	NC_000002.12:143842117-143842413	mUCE.0265
NW_004497268.1:1071468-1071671	204	2:83438419-83438621	NC_000002.12:143844806-143845008	mUCE.0266
NW_004497268.1:1156589-1156926	338	2:83520766-83521102	NC_000002.12:143934972-143935308	mUCE.0267
NW_004497268.1:1168444-1168729	286	2:83533168-83533450	NC_000002.12:143946789-143947073	mUCE.0268
NW_004497268.1:1177416-1177625	210	2:83542324-83542532	NC_000002.12:143955728-143955934	mUCE.0269
NW_004497268.1:1261443-1261733	291	2:83602468-83602757	NC_000002.12:144005235-144005524	mUCE.0270
NW_004497268.1:1344204-1344532	329	2:83701027-83701334	NC_000002.12:144078120-144078447	mUCE.0271
NW_004497268.1:1391588-1391818	231	2:83751258-83751487	NC_000002.12:144125780-144126008	mUCE.0272
NW_004497268.1:1428811-1429031	221	2:83790760-83790979	NC_000002.12:144158239-144158457	mUCE.0273
NW_004497268.1:1666699-1666916	218	2:84040629-84040845	NC_000002.12:144389699-144389915	mUCE.0274
NW_004497268.1:1703491-1703747	257	2:84076817-84077072	NC_000002.12:144424835-144425090	mUCE.0275
NW_004497268.1:1707051-1707319	269	2:84080272-84080539	NC_000002.12:144428317-144428584	mUCE.0276
NW_004497268.1:1710060-1710472	413	2:84083224-84083635	NC_000002.12:144431257-144431672	mUCE.0277
NW_004497268.1:1712131-1712352	222	2:84085313-84085533	NC_000002.12:144433291-144433509	mUCE.0278
NW_004497268.1:1722199-1722537	339	2:84095208-84095545	NC_000002.12:144443368-144443705	mUCE.0279
NW_004497268.1:1730934-1731265	332	2:84103267-84103597	NC_000002.12:144452438-144452768	mUCE.0280
NW_004497268.1:1733377-1733696	320	2:84105697-84106014	NC_000002.12:144454931-144455249	mUCE.0281
NW_004497268.1:1768261-1768619	359	2:84140334-84140691	NC_000002.12:144489462-144489819	mUCE.0282
NW_004497268.1:1798560-1799083	524	2:84171085-84171601	NC_000002.12:144519911-144520430	mUCE.0283
NW_004497268.1:1853854-1854116	263	2:84238338-84238599	NC_000002.12:144580704-144580965	mUCE.0284
NW_004497268.1:1924863-1925127	265	2:84305213-84305475	NC_000002.12:144650971-144651233	mUCE.0285
NW_004497268.1:2145993-2146390	398	2:84566151-84566547	NC_000002.12:144874227-144874623	mUCE.0286
NW_004497268.1:2267681-2267883	203	2:84705132-84705333	NC_000002.12:144999612-144999810	mUCE.0287
NW_004497268.1:2302563-2302775	213	2:84731324-84731535	NC_000002.12:145028373-145028584	mUCE.0288
NW_004497268.1:2641438-2641848	411	2:85122665-85123074	NC_000002.12:145300250-145300659	mUCE.0289
NW_004497268.1:2928227-2928441	215	NA	NC_000002.12:145597913-145598126	mUCE.0290
NW_004497268.1:2995503-2995940	438	2:85515241-85515674	NC_000002.12:145655064-145655500	mUCE.0291
NW_004497268.1:2995969-2996228	260	2:85515706-85515962	NC_000002.12:145655545-145655786	mUCE.0292
NW_004497268.1:4394152-4394377	226	2:86933786-86934008	NC_000002.12:146917762-146917986	mUCE.0293
NW_004497268.1:4684178-4684383	206	2:87263002-87263199	NC_000002.12:147243166-147243367	mUCE.0294
NW_004497268.1:4908281-4908511	231	2:87522316-87522545	NC_000002.12:147456965-147457194	mUCE.0295
NW_004497268.1:5174539-5174793	255	2:87804571-87804823	NC_000002.12:147695457-147695709	mUCE.0296
NW_004497268.1:5546789-5547008	220	2:88135961-88136184	NC_000002.12:148021504-148021722	mUCE.0297
NW_004497268.1:5942798-5943080	283	2:88507830-88508111	NC_000002.12:148468777-148469058	mUCE.0298
NW_004497268.1:5957094-5957376	283	2:88521776-88522057	NC_000002.12:148483228-148483509	mUCE.0299
NW_004480998.1:1132271-1132578	308	2:88833925-88834228	NC_000002.12:148787387-148787691	mUCE.0300
NW_004471857.1:6148474-6148736	263	2:95673785-95674046	NC_000002.12:155715820-155716081	mUCE.0301
NW_004471857.1:6138336-6138584	249	2:95684728-95684974	NC_000002.12:155724962-155725208	mUCE.0302
NW_004471857.1:6134954-6135193	240	2:95688107-95688342	NC_000002.12:155728266-155728501	mUCE.0303
NW_004471857.1:6031823-6032047	225	2:95776006-95776229	NC_000002.12:155839449-155839672	mUCE.0304
NW_004471857.1:5997262-5997638	377	2:95801621-95801995	NC_000002.12:155870446-155870820	mUCE.0305
NW_004471857.1:5981160-5981536	377	2:95820700-95821074	NC_000002.12:155905657-155906032	mUCE.0306
NW_004471857.1:5978264-5978493	230	2:95823079-95823308	NC_000002.12:155908077-155908306	mUCE.0307
NW_004471857.1:5728044-5728293	250	2:96079263-96079511	NC_000002.12:156164175-156164423	mUCE.0308
NW_004471857.1:5558496-5558740	245	2:96262104-96262347	NC_000002.12:156338172-156338415	mUCE.0309
NW_004471857.1:5286980-5287449	470	2:96505262-96505729	NC_000002.12:156590241-156590709	mUCE.0310
NW_004471857.1:5179263-5179765	503	2:96625245-96625746	NC_000002.12:156694794-156695295	mUCE.0311
NW_004471857.1:5070909-5071119	211	2:96722986-96723195	NC_000002.12:156803563-156803764	mUCE.0312
NW_004463033.1:513524-513747	224	2:98997703-98997925	NC_000002.12:159176334-159176555	mUCE.0313
NW_004463033.1:270837-271062	226	2:99264080-99264301	NC_000002.12:159453606-159453827	mUCE.0314
NW_004500698.1:76539-76761	223	11:82138976-82139197	NC_000002.12:15946600-15946816	mUCE.0315
NW_004481689.1:7359185-7359389	205	2:101021387-101021590	NC_000002.12:161240915-161241118	mUCE.0316
NW_004481689.1:7201182-7201868	687	2:101151794-101152479	NC_000002.12:161381797-161382482	mUCE.0317
NW_004481689.1:6427669-6427912	244	2:101871178-101871421	NC_000002.12:162149581-162149823	mUCE.0318
NW_004481689.1:5149293-5149525	233	2:103144921-103145152	NC_000002.12:163322742-163322973	mUCE.0319
NW_004481689.1:4949689-4949986	298	2:103317133-103317429	NC_000002.12:163463211-163463507	mUCE.0320
NW_004481689.1:4949406-4949687	282	2:103317432-103317712	NC_000002.12:163463510-163463790	mUCE.0321
NW_004481689.1:4947252-4947627	376	2:103319667-103320041	NC_000002.12:163465604-163465970	mUCE.0322
NW_004481689.1:4856392-4856620	229	2:103352098-103352325	NC_000002.12:163493602-163493829	mUCE.0323
NW_004481689.1:4749208-4749517	310	2:103440513-103440819	NC_000002.12:163594169-163594475	mUCE.0324
NW_004481689.1:4748755-4749206	452	2:103440822-103441271	NC_000002.12:163594478-163594928	mUCE.0325
NW_004481689.1:4628976-4629230	255	2:103565602-103565851	NC_000002.12:163716061-163716311	mUCE.0326
NW_004481689.1:4526064-4526468	405	2:103654137-103654540	NC_000002.12:163800695-163801098	mUCE.0327
NW_004481689.1:4383017-4383290	274	2:103769346-103769618	NC_000002.12:163944383-163944655	mUCE.0328
NW_004481689.1:4091337-4091546	210	2:104073604-104073812	NC_000002.12:164198508-164198716	mUCE.0329
NW_004481689.1:3870413-3870693	281	2:104367120-104367399	NC_000002.12:164429284-164429563	mUCE.0330
NW_004481689.1:3787201-3787457	257	2:104465363-104465617	NC_000002.12:164508520-164508775	mUCE.0331
NW_004480573.1:1243581-1243889	309	2:110524111-110524418	NC_000002.12:170651759-170652065	mUCE.0332
NW_004480573.1:1194715-1195077	363	2:110577337-110577698	NC_000002.12:170715008-170715369	mUCE.0333
NW_004465196.1:244310-244516	207	2:111805482-111805687	NC_000002.12:172066668-172066868	mUCE.0334
NW_004465196.1:248681-249071	391	2:111809994-111810380	NC_000002.12:172072268-172072657	mUCE.0335
NW_004465196.1:249073-249721	649	2:111810401-111811037	NC_000002.12:172072660-172073308	mUCE.0336
NW_004465196.1:260339-260627	289	2:111821588-111821875	NC_000002.12:172083901-172084188	mUCE.0337
NW_004465196.1:270112-270706	595	2:111831217-111831810	NC_000002.12:172093634-172094227	mUCE.0338
NW_004491115.1:581842-582165	324	2:112779839-112780161	NC_000002.12:173136594-173136916	mUCE.0339
NW_004491115.1:643822-644416	595	2:112827086-112827679	NC_000002.12:173198009-173198602	mUCE.0340
NW_004491115.1:699082-699429	348	2:112874446-112874792	NC_000002.12:173250017-173250363	mUCE.0341
NW_004491115.1:699431-699657	227	2:112874795-112875019	NC_000002.12:173250366-173250591	mUCE.0342
NW_004491115.1:793671-793906	236	2:112974887-112975118	NC_000002.12:173386274-173386506	mUCE.0343
NW_004491115.1:1546042-1546326	285	2:113630898-113631180	NC_000002.12:174083995-174084276	mUCE.0344
NW_004491115.1:1563874-1564082	209	2:113648116-113648321	NC_000002.12:174104972-174105177	mUCE.0345
NW_004491115.1:1582292-1582545	254	2:113668759-113669009	NC_000002.12:174124238-174124491	mUCE.0346
NW_004491115.1:1583119-1583483	365	2:113669592-113669955	NC_000002.12:174125076-174125439	mUCE.0347
NW_004491115.1:1605555-1605755	201	2:113690439-113690638	NC_000002.12:174141815-174142012	mUCE.0348
NW_004491115.1:1625683-1625959	277	2:113715568-113715842	NC_000002.12:174158946-174159221	mUCE.0349
NW_004491115.1:1641203-1641509	307	2:113734673-113734976	NC_000002.12:174176943-174177248	mUCE.0350
NW_004491115.1:1857435-1857854	420	2:113862809-113863224	NC_000002.12:174338961-174339377	mUCE.0351
NW_004491115.1:1859957-1860174	218	2:113865247-113865460	NC_000002.12:174341419-174341634	mUCE.0352
NW_004491115.1:1861372-1861757	386	2:113866645-113867029	NC_000002.12:174342850-174343234	mUCE.0353
NW_004491115.1:2652596-2652828	233	2:114546129-114546359	NC_000002.12:175103199-175103430	mUCE.0354
NW_004491115.1:2864922-2865151	230	2:114701637-114701860	NC_000002.12:175264488-175264716	mUCE.0355
NW_004491115.1:3030469-3030697	229	2:114885547-114885775	NC_000002.12:175431265-175431492	mUCE.0356
NW_004491115.1:3221453-3221686	234	2:115089541-115089771	NC_000002.12:175686799-175687030	mUCE.0357
NW_004491115.1:3409518-3410056	539	2:115277574-115278111	NC_000002.12:175889924-175890461	mUCE.0358
NW_004491115.1:3670877-3671188	312	2:115525809-115526120	NC_000002.12:176118916-176119221	mUCE.0359
NW_004494223.1:543-874	332	2:116311825-116312154	NC_000002.12:176892994-176893324	mUCE.0360
NW_004491115.1:4538766-4539011	246	2:116392842-116393080	NC_000002.12:176980148-176980387	mUCE.0361
NW_004491115.1:4634847-4635124	278	2:116484679-116484955	NC_000002.12:177059616-177059892	mUCE.0362
NW_004491115.1:5202645-5202888	244	2:116956038-116956280	NC_000002.12:177537883-177538125	mUCE.0363
NW_004491115.1:9346363-9346634	272	2:121018121-121018389	NC_000002.12:181326837-181327107	mUCE.0364
NW_004491115.1:9346637-9346848	212	2:121018394-121018604	NC_000002.12:181327111-181327321	mUCE.0365
NW_004491244.1:2875295-2875502	208	2:128657079-128657284	NC_000002.12:188569464-188569670	mUCE.0366
NW_004483363.1:234440-234659	220	2:55409567-55409785	NC_000002.12:191950000-191950218	mUCE.0367
NW_004480336.1:1588275-1588495	221	11:79020400-79020617	NC_000002.12:19487161-19487380	mUCE.0368
NW_004482868.1:536566-537061	496	2:49065387-49065881	NC_000002.12:198337595-198338089	mUCE.0369
NW_004482868.1:525344-525648	305	2:49052328-49052624	NC_000002.12:198351349-198351648	mUCE.0370
NW_004482868.1:512349-512955	607	2:49040689-49041294	NC_000002.12:198362547-198363152	mUCE.0371
NW_004482868.1:284309-284532	224	2:48815059-48815281	NC_000002.12:198558232-198558454	mUCE.0372
NW_004482868.1:205041-205243	203	2:48704276-48704477	NC_000002.12:198653502-198653703	mUCE.0373
NW_004482868.1:199988-200247	260	2:48699310-48699568	NC_000002.12:198658338-198658596	mUCE.0374
NW_004480304.1:4001222-4001446	225	2:47502545-47502768	NC_000002.12:199842984-199843205	mUCE.0375
NW_004480304.1:3991893-3992303	411	2:47493353-47493762	NC_000002.12:199851827-199852236	mUCE.0376
NW_004480304.1:2829024-2829370	347	2:46462423-46462767	NC_000002.12:200860023-200860367	mUCE.0377
NW_004483130.1:123399-123625	227	11:78292396-78292618	NC_000002.12:20278704-20278927	mUCE.0378
NW_004479087.1:675226-675553	328	2:40458800-40459122	NC_000002.12:207165391-207165715	mUCE.0379
NW_004491808.1:22-306	285	2:40084087-40084369	NC_000002.12:207529886-207530165	mUCE.0380
NW_004483336.1:1962501-1962785	285	2:38338819-38339102	NC_000002.12:209696507-209696790	mUCE.0381
NW_004483336.1:1962184-1962399	216	2:38338501-38338715	NC_000002.12:209696889-209697103	mUCE.0382
NW_004483336.1:1643042-1643255	214	2:38086399-38086609	NC_000002.12:209970777-209970988	mUCE.0383
NW_004471592.1:562434-562664	231	2:35740438-35740664	NC_000002.12:212215860-212216083	mUCE.0384
NW_004471592.1:494156-494360	205	2:35655177-35655380	NC_000002.12:212284361-212284562	mUCE.0385
NW_004501452.1:405388-405605	218	2:34658396-34658612	NC_000002.12:213149556-213149772	mUCE.0386
NW_004495492.1:854799-855012	214	2:27550611-27550823	NC_000002.12:220310590-220310804	mUCE.0387
NW_004495492.1:1099291-1099500	210	2:27334141-27334349	NC_000002.12:220509249-220509457	mUCE.0388
NW_004474033.1:1359690-1359984	295	2:17827890-17828178	NC_000002.12:229858766-229859057	mUCE.0389
NW_004472245.1:31190-31438	249	3:6672691-6672937	NC_000002.12:234496357-234496603	mUCE.0390
NW_004480476.1:28969-29233	265	3:5412885-5413148	NC_000002.12:235835935-235836198	mUCE.0391
NW_004480476.1:39963-40169	207	3:5401180-5401385	NC_000002.12:235849029-235849231	mUCE.0392
NW_004480567.1:49151-49396	246	3:5213626-5213870	NC_000002.12:236054921-236055165	mUCE.0393
NW_004480567.1:137349-137764	416	3:5119788-5120200	NC_000002.12:236162737-236163151	mUCE.0394
NW_004480567.1:152778-153004	227	3:5103942-5104167	NC_000002.12:236179040-236179265	mUCE.0395
NW_004480567.1:224603-224905	303	3:5029041-5029342	NC_000002.12:236257023-236257324	mUCE.0396
NW_004468835.1:110319-110529	211	11:73772494-73772696	NC_000002.12:25240289-25240492	mUCE.0397
NW_004469504.1:2186864-2187110	247	11:15629773-15630018	NC_000002.12:33257236-33257481	mUCE.0398
NW_004482165.1:2079989-2080197	209	11:18787675-18787878	NC_000002.12:36464482-36464689	mUCE.0399
NW_004459623.1:754646-754883	238	11:25978603-25978839	NC_000002.12:43896998-43897233	mUCE.0400
NW_004459623.1:792454-792833	380	11:26019871-26020249	NC_000002.12:43939691-43940069	mUCE.0401
NW_004459623.1:1495241-1495513	273	11:26551596-26551867	NC_000002.12:44493913-44494184	mUCE.0402
NW_004459623.1:1505470-1505670	201	11:26558406-26558602	NC_000002.12:44498661-44498859	mUCE.0403
NW_004459623.1:1539072-1539280	209	11:26590437-26590644	NC_000002.12:44529839-44530046	mUCE.0404
NW_004459623.1:1559545-1559819	275	11:26605481-26605754	NC_000002.12:44546367-44546641	mUCE.0405
NW_004459623.1:1588948-1589231	284	11:26643752-26644034	NC_000002.12:44580631-44580913	mUCE.0406
NW_004459623.1:1631428-1632098	671	11:26688656-26689315	NC_000002.12:44618101-44618770	mUCE.0407
NW_004459623.1:1729638-1729884	247	11:26770894-26771139	NC_000002.12:44705947-44706192	mUCE.0408
NW_004459623.1:1773441-1773717	277	11:26801002-26801277	NC_000002.12:44743740-44744015	mUCE.0409
NW_004459623.1:1791566-1791783	218	11:26821038-26821254	NC_000002.12:44766387-44766603	mUCE.0410
NW_004459623.1:1801194-1801487	294	11:26831287-26831579	NC_000002.12:44775984-44776274	mUCE.0411
NW_004459623.1:1877020-1877370	351	11:26891235-26891584	NC_000002.12:44841429-44841778	mUCE.0412
NW_004459623.1:2518223-2518445	223	11:27476064-27476285	NC_000002.12:45450883-45451103	mUCE.0413
NW_004495897.1:246608-246829	222	11:29483470-29483690	NC_000002.12:47521165-47521385	mUCE.0414
NW_004480297.1:2104993-2105273	281	11:32599380-32599660	NC_000002.12:50620949-50621228	mUCE.0415
NW_004480297.1:2104754-2104989	236	11:32599665-32599899	NC_000002.12:50621233-50621467	mUCE.0416
NW_004486216.1:302025-302292	268	11:90777316-90777579	NC_000002.12:5410110-5410376	mUCE.0417
NW_004480907.1:230465-230684	220	11:37623622-37623840	NC_000002.12:55303046-55303264	mUCE.0418
NW_004479157.1:345992-346196	205	11:38452118-38452321	NC_000002.12:56192476-56192679	mUCE.0419
NW_004462005.1:630539-630835	297	11:90543546-90543834	NC_000002.12:5694813-5695108	mUCE.0420
NW_004483393.1:612229-612483	255	11:40002269-40002522	NC_000002.12:57741101-57741354	mUCE.0421
NW_004483393.1:634535-634959	425	11:40024076-40024500	NC_000002.12:57759434-57759858	mUCE.0422
NW_004483393.1:734977-735276	300	11:40137092-40137390	NC_000002.12:57869724-57870019	mUCE.0423
NW_004483393.1:1333290-1333601	312	11:40730379-40730688	NC_000002.12:58445417-58445727	mUCE.0424
NW_004483393.1:1353718-1353925	208	11:40755144-40755351	NC_000002.12:58469128-58469331	mUCE.0425
NW_004483393.1:1404652-1404853	202	11:40808055-40808253	NC_000002.12:58520614-58520814	mUCE.0426
NW_004483393.1:1405873-1406142	270	11:40810031-40810299	NC_000002.12:58521822-58522090	mUCE.0427
NW_004483393.1:1406405-1406690	286	11:40810563-40810848	NC_000002.12:58522354-58522638	mUCE.0428
NW_004483393.1:1521940-1522400	461	11:40922932-40923391	NC_000002.12:58633228-58633687	mUCE.0429
NW_004483393.1:1557282-1557678	397	11:40959240-40959635	NC_000002.12:58664544-58664940	mUCE.0430
NW_004483393.1:1651173-1651496	324	11:41069903-41070221	NC_000002.12:58766544-58766861	mUCE.0431
NW_004483393.1:1654192-1654679	488	11:41072885-41073370	NC_000002.12:58769540-58770025	mUCE.0432
NW_004483393.1:1767810-1768155	346	11:41196321-41196665	NC_000002.12:58881005-58881349	mUCE.0433
NW_004483393.1:1782558-1782800	243	11:41210148-41210386	NC_000002.12:58893971-58894212	mUCE.0434
NW_004483393.1:1803709-1803952	244	11:41231769-41232010	NC_000002.12:58914752-58914994	mUCE.0435
NW_004483393.1:1825871-1826188	318	11:41255410-41255726	NC_000002.12:58936306-58936621	mUCE.0436
NW_004483393.1:1863303-1863612	310	11:41293765-41294072	NC_000002.12:58972697-58973005	mUCE.0437
NW_004483393.1:1866160-1866386	227	11:41296656-41296881	NC_000002.12:58975479-58975704	mUCE.0438
NW_004483393.1:1873714-1873967	254	11:41307116-41307360	NC_000002.12:58983247-58983499	mUCE.0439
NW_004483393.1:1921753-1922085	333	11:41353337-41353668	NC_000002.12:59026227-59026558	mUCE.0440
NW_004483393.1:1966830-1967322	493	11:41408415-41408907	NC_000002.12:59078112-59078603	mUCE.0441
NW_004483393.1:2008663-2008884	222	11:41453007-41453225	NC_000002.12:59138072-59138291	mUCE.0442
NW_004483393.1:2180093-2180346	254	11:41642557-41642803	NC_000002.12:59313889-59314148	mUCE.0443
NW_004483393.1:2444433-2444636	204	11:41921074-41921270	NC_000002.12:59586592-59586787	mUCE.0444
NW_004483393.1:2513434-2513643	210	11:41997082-41997288	NC_000002.12:59663960-59664164	mUCE.0445
NW_004483393.1:2629545-2629821	277	11:42106218-42106493	NC_000002.12:59771542-59771804	mUCE.0446
NW_004483393.1:2691004-2691401	398	11:42171760-42172153	NC_000002.12:59828950-59829346	mUCE.0447
NW_004483393.1:2735783-2736121	339	11:42223568-42223898	NC_000002.12:59879518-59879855	mUCE.0448
NW_004483393.1:2771448-2771750	303	11:42257089-42257390	NC_000002.12:59910832-59911133	mUCE.0449
NW_004483393.1:2772550-2773034	485	11:42258174-42258657	NC_000002.12:59911921-59912404	mUCE.0450
NW_004483393.1:2785566-2785773	208	11:42273524-42273731	NC_000002.12:59925492-59925698	mUCE.0451
NW_004483393.1:2821937-2822210	274	11:42283960-42284232	NC_000002.12:59936113-59936385	mUCE.0452
NW_004483393.1:2950779-2951141	363	11:42416894-42417251	NC_000002.12:60064774-60065135	mUCE.0453
NW_004483393.1:2956684-2957241	558	11:42423863-42424420	NC_000002.12:60070652-60071207	mUCE.0454
NW_004483393.1:2957243-2957577	335	11:42424423-42424752	NC_000002.12:60071210-60071543	mUCE.0455
NW_004483393.1:3082205-3082595	391	11:42537720-42538109	NC_000002.12:60214439-60214828	mUCE.0456
NW_004483393.1:3138008-3138245	238	11:42600001-42600237	NC_000002.12:60273956-60274192	mUCE.0457
NW_004483393.1:3152312-3152512	201	11:42613332-42613531	NC_000002.12:60289522-60289721	mUCE.0458
NW_004483393.1:3317168-3317619	452	11:42811127-42811573	NC_000002.12:60460392-60460838	mUCE.0459
NW_004483393.1:3321939-3322139	201	11:42816030-42816229	NC_000002.12:60465192-60465389	mUCE.0460
NW_004483393.1:3389867-3390082	216	11:42882903-42883115	NC_000002.12:60533669-60533881	mUCE.0461
NW_004483393.1:3409862-3410128	267	11:42902314-42902575	NC_000002.12:60553536-60553802	mUCE.0462
NW_004483393.1:3423314-3423618	305	11:42915363-42915666	NC_000002.12:60567219-60567521	mUCE.0463
NW_004483393.1:3427123-3427376	254	11:42919013-42919257	NC_000002.12:60571043-60571291	mUCE.0464
NW_004483393.1:3435525-3435861	337	11:42927441-42927776	NC_000002.12:60579519-60579850	mUCE.0465
NW_004483393.1:3513591-3513799	209	11:43011085-43011292	NC_000002.12:60672187-60672394	mUCE.0466
NW_004483393.1:4149330-4149630	301	11:59568949-59569248	NC_000002.12:61203097-61203391	mUCE.0467
NW_004483393.1:4450501-4450758	258	11:59821576-59821829	NC_000002.12:61478504-61478761	mUCE.0468
NW_004483393.1:4484060-4484263	204	11:59852093-59852291	NC_000002.12:61523628-61523829	mUCE.0469
NW_004493905.1:230196-230432	237	11:60683562-60683794	NC_000002.12:62495748-62495983	mUCE.0470
NW_004483051.1:4663128-4663370	243	11:61145407-61145646	NC_000002.12:62964882-62965121	mUCE.0471
NW_004483051.1:4660382-4660689	308	11:61147836-61148134	NC_000002.12:62967232-62967533	mUCE.0472
NW_004483051.1:4658765-4658998	234	11:61149330-61149562	NC_000002.12:62968777-62969009	mUCE.0473
NW_004483051.1:4636201-4636515	315	11:61173418-61173731	NC_000002.12:62992652-62992965	mUCE.0474
NW_004483051.1:4635055-4635274	220	11:61174671-61174886	NC_000002.12:62993894-62994112	mUCE.0475
NW_004483051.1:4612108-4612353	246	11:61193180-61193425	NC_000002.12:63013521-63013766	mUCE.0476
NW_004483051.1:4596317-4596539	223	11:61211106-61211327	NC_000002.12:63035688-63035909	mUCE.0477
NW_004481891.1:1664225-1664583	359	11:61573019-61573377	NC_000002.12:63434655-63435010	mUCE.0478
NW_004481891.1:446919-447138	220	11:62724120-62724338	NC_000002.12:64592763-64592978	mUCE.0479
NW_004483451.1:954066-954336	271	11:63710789-63711058	NC_000002.12:65637762-65638030	mUCE.0480
NW_004483451.1:979435-979668	234	11:63738070-63738302	NC_000002.12:65662845-65663076	mUCE.0481
NW_004483451.1:1031945-1032332	388	11:63789640-63790026	NC_000002.12:65714690-65715076	mUCE.0482
NW_004483451.1:1188010-1188366	357	11:63977372-63977727	NC_000002.12:65866122-65866477	mUCE.0483
NW_004481698.1:203148-203423	276	11:64161760-64162034	NC_000002.12:66071407-66071681	mUCE.0484
NW_004481698.1:106367-106650	284	11:64264838-64265117	NC_000002.12:66184343-66184625	mUCE.0485
NW_004463161.1:185791-186010	220	11:64528689-64528907	NC_000002.12:66439798-66440007	mUCE.0486
NW_004463161.1:190797-191024	228	11:64533549-64533771	NC_000002.12:66444743-66444969	mUCE.0487
NW_004463161.1:208247-208681	435	11:64552187-64552617	NC_000002.12:66462279-66462709	mUCE.0488
NW_004463161.1:254589-254889	301	11:64605652-64605951	NC_000002.12:66512057-66512353	mUCE.0489
NW_004463161.1:265322-265544	223	11:64616154-64616373	NC_000002.12:66522498-66522719	mUCE.0490
NW_004463161.1:279160-279569	410	11:64632416-64632824	NC_000002.12:66537110-66537518	mUCE.0491
NW_004463161.1:310179-310459	281	11:64666377-64666656	NC_000002.12:66569320-66569599	mUCE.0492
NW_004463161.1:311089-311467	379	11:64667288-64667665	NC_000002.12:66570232-66570609	mUCE.0493
NW_004463161.1:312531-312766	236	11:64668762-64668995	NC_000002.12:66571703-66571936	mUCE.0494
NW_004463161.1:312945-313190	246	11:64669173-64669417	NC_000002.12:66572118-66572362	mUCE.0495
NW_004463161.1:315369-315687	319	11:64671560-64671877	NC_000002.12:66574534-66574851	mUCE.0496
NW_004463161.1:398003-398223	221	11:64757516-64757732	NC_000002.12:66688787-66689007	mUCE.0497
NW_004463161.1:633354-633705	352	11:64931843-64932193	NC_000002.12:66843691-66844041	mUCE.0498
NW_004463161.1:706413-706617	205	11:65032344-65032547	NC_000002.12:66930615-66930817	mUCE.0499
NW_004463161.1:767774-767991	218	11:65115331-65115541	NC_000002.12:66989995-66990208	mUCE.0500
NW_004463161.1:782319-782604	286	11:65128613-65128890	NC_000002.12:67006975-67007257	mUCE.0501
NW_004463161.1:1027955-1028175	221	11:65380271-65380479	NC_000002.12:67236138-67236357	mUCE.0502
NW_004463161.1:1530223-1530440	218	11:65890346-65890563	NC_000002.12:67725717-67725930	mUCE.0503
NW_004463161.1:1530442-1530642	201	11:65890567-65890765	NC_000002.12:67725933-67726132	mUCE.0504
NW_004463161.1:2006530-2006732	203	11:66320970-66321168	NC_000002.12:68186463-68186662	mUCE.0505
NW_004480446.1:194924-195163	240	11:68262540-68262776	NC_000002.12:70228311-70228549	mUCE.0506
NW_004482013.1:1315100-1315339	240	11:12099259-12099494	NC_000002.12:72275628-72275861	mUCE.0507
NW_004482013.1:529347-529693	347	11:11366915-11367260	NC_000002.12:72947848-72948193	mUCE.0508
NW_004482013.1:528967-529345	379	11:11366535-11366912	NC_000002.12:72948196-72948573	mUCE.0509
NW_004462005.1:2685415-2685676	262	11:89308358-89308620	NC_000002.12:7352230-7352490	mUCE.0510
NW_004462005.1:2968176-2968391	216	11:89083436-89083647	NC_000002.12:7625550-7625763	mUCE.0511
NW_004462005.1:2976264-2976624	361	11:89074458-89074813	NC_000002.12:7634475-7634833	mUCE.0512
NW_004483288.1:1502075-1502321	247	11:54821919-54822163	NC_000002.12:80304069-80304312	mUCE.0513
NW_004462915.1:1865814-1866026	213	11:54424144-54424356	NC_000002.12:80619023-80619234	mUCE.0514
NW_004477638.1:187249-187578	330	11:88737495-88737823	NC_000002.12:8073568-8073896	mUCE.0515
NW_004477638.1:248530-248802	273	11:88678001-88678272	NC_000002.12:8141869-8142140	mUCE.0516
NW_004482564.1:764516-764720	205	1:46687467-46687669	NC_000003.12:102458397-102458600	mUCE.0517
NW_004491624.1:330013-330276	264	1:52323691-52323953	NC_000003.12:107810955-107811217	mUCE.0518
NW_004489404.1:2332650-2333069	420	1:58870294-58870709	NC_000003.12:114454528-114454941	mUCE.0519
NW_004489404.1:2333419-2333633	215	1:58870965-58871178	NC_000003.12:114455181-114455394	mUCE.0520
NW_004489404.1:2373830-2374079	250	1:58909476-58909726	NC_000003.12:114495766-114496014	mUCE.0521
NW_004489404.1:2435070-2435569	500	1:58973951-58974450	NC_000003.12:114565053-114565553	mUCE.0522
NW_004489404.1:2456965-2457184	220	1:58995820-58996038	NC_000003.12:114585859-114586077	mUCE.0523
NW_004489404.1:2490232-2490486	255	1:59031051-59031303	NC_000003.12:114615742-114615995	mUCE.0524
NW_004489404.1:2591576-2591851	276	1:59145058-59145330	NC_000003.12:114714545-114714818	mUCE.0525
NW_004489404.1:2792938-2793247	310	1:59303522-59303830	NC_000003.12:114856634-114856942	mUCE.0526
NW_004489404.1:3031494-3031794	301	1:59511708-59512007	NC_000003.12:115082072-115082372	mUCE.0527
NW_004491848.1:242782-243236	455	1:131362043-131362495	NC_000003.12:137406757-137407209	mUCE.0528
NW_004491848.1:194141-194476	336	1:131317608-131317942	NC_000003.12:137467327-137467657	mUCE.0529
NW_004491848.1:193933-194139	207	1:131317401-131317605	NC_000003.12:137467660-137467865	mUCE.0530
NW_004480929.1:235435-235705	271	1:125529193-125529462	NC_000003.12:143024618-143024887	mUCE.0531
NW_004495664.1:1564560-1564810	251	1:120553424-120553673	NC_000003.12:147380545-147380793	mUCE.0532
NW_004495664.1:2438456-2438661	206	1:119809296-119809499	NC_000003.12:148083600-148083804	mUCE.0533
NW_004495664.1:2628967-2629272	306	1:119603936-119604240	NC_000003.12:148246673-148246977	mUCE.0534
NW_004495664.1:2702522-2702812	291	1:119515821-119516110	NC_000003.12:148289413-148289702	mUCE.0535
NW_004495664.1:2780330-2780668	339	1:119466882-119467219	NC_000003.12:148331078-148331413	mUCE.0536
NW_004485152.1:505273-505585	313	1:117794517-117794826	NC_000003.12:149966108-149966418	mUCE.0537
NW_004482049.1:1262543-1262865	323	1:117274763-117275085	NC_000003.12:150438135-150438444	mUCE.0538
NW_004482049.1:1009980-1010191	212	1:117095588-117095797	NC_000003.12:150627651-150627861	mUCE.0539
NW_004494675.1:1082324-1082740	417	1:114992982-114993391	NC_000003.12:152446414-152446821	mUCE.0540
NW_004494675.1:1083497-1083730	234	1:114992021-114992252	NC_000003.12:152447548-152447779	mUCE.0541
NW_004494675.1:1091525-1091842	318	1:114984245-114984561	NC_000003.12:152455298-152455614	mUCE.0542
NW_004494675.1:1100348-1100666	319	1:114975464-114975780	NC_000003.12:152464351-152464668	mUCE.0543
NW_004472582.1:1562591-1562877	287	1:109383556-109383840	NC_000003.12:157754465-157754749	mUCE.0544
NW_004472582.1:1496560-1496832	273	1:109351079-109351350	NC_000003.12:157786203-157786469	mUCE.0545
NW_004472582.1:1431139-1431387	249	1:109278524-109278767	NC_000003.12:157833669-157833914	mUCE.0546
NW_004472582.1:1345254-1345480	227	1:109206687-109206912	NC_000003.12:157919398-157919623	mUCE.0547
NW_004472582.1:1184956-1185408	453	1:109024977-109025426	NC_000003.12:158058408-158058859	mUCE.0548
NW_004472582.1:1184712-1184954	243	1:109024733-109024974	NC_000003.12:158058862-158059103	mUCE.0549
NW_004472582.1:1184274-1184503	230	1:109024295-109024523	NC_000003.12:158059312-158059540	mUCE.0550
NW_004472582.1:1043310-1043676	367	1:108900320-108900685	NC_000003.12:158165274-158165639	mUCE.0551
NW_004472582.1:951010-951212	203	1:108823628-108823829	NC_000003.12:158233951-158234152	mUCE.0552
NW_004472582.1:907947-908163	217	1:108784666-108784881	NC_000003.12:158292192-158292407	mUCE.0553
NW_004472582.1:907706-907939	234	1:108784426-108784657	NC_000003.12:158292416-158292647	mUCE.0554
NW_004472582.1:885158-885547	390	1:108766160-108766548	NC_000003.12:158308182-158308570	mUCE.0555
NW_004481019.1:852480-852896	417	1:106512279-106512689	NC_000003.12:160500155-160500570	mUCE.0556
NW_004461441.1:2427115-2427342	228	1:97956429-97956654	NC_000003.12:168988843-168989068	mUCE.0557
NW_004461441.1:2279105-2279355	251	1:97813964-97814213	NC_000003.12:169116364-169116613	mUCE.0558
NW_004461441.1:2278877-2279103	227	1:97813736-97813961	NC_000003.12:169116616-169116841	mUCE.0559
NW_004461441.1:2154315-2154631	317	1:97662073-97662383	NC_000003.12:169250091-169250406	mUCE.0560
NW_004461441.1:2039587-2039833	247	1:97536258-97536503	NC_000003.12:169364734-169364980	mUCE.0561
NW_004461441.1:1977052-1977327	276	1:97465022-97465296	NC_000003.12:169430625-169430899	mUCE.0562
NW_004461441.1:1957007-1957343	337	1:97444181-97444516	NC_000003.12:169453124-169453458	mUCE.0563
NW_004461441.1:1956535-1956804	270	1:97443711-97443979	NC_000003.12:169453658-169453926	mUCE.0564
NW_004461441.1:1952281-1952481	201	1:97438621-97438820	NC_000003.12:169457992-169458190	mUCE.0565
NW_004461441.1:1933460-1934090	631	1:97415278-97415902	NC_000003.12:169476050-169476679	mUCE.0566
NW_004461441.1:1828771-1829074	304	1:97317172-97317474	NC_000003.12:169573977-169574279	mUCE.0567
NW_004461441.1:1822963-1823292	330	1:97312015-97312339	NC_000003.12:169579193-169579519	mUCE.0568
NW_004461441.1:1820500-1820700	201	1:97309045-97309244	NC_000003.12:169581837-169582036	mUCE.0569
NW_004461441.1:1794784-1795088	305	1:97284307-97284610	NC_000003.12:169607940-169608243	mUCE.0570
NW_004461441.1:1727236-1727484	249	1:97217576-97217819	NC_000003.12:169667947-169668194	mUCE.0571
NW_004461441.1:1619431-1619633	203	1:97115744-97115942	NC_000003.12:169783420-169783619	mUCE.0572
NW_004493788.1:708028-708250	223	1:95975485-95975707	NC_000003.12:171063781-171064002	mUCE.0573
NW_004493788.1:705305-705600	296	1:95972796-95973091	NC_000003.12:171066476-171066770	mUCE.0574
NW_004493050.1:372058-372301	244	1:154290774-154291016	NC_000003.12:17506396-17506638	mUCE.0575
NW_004470287.1:21542-21748	207	1:154329474-154329678	NC_000003.12:17551122-17551324	mUCE.0576
NW_004470287.1:60628-60906	279	1:154355791-154356068	NC_000003.12:17577921-17578198	mUCE.0577
NW_004470287.1:137498-137863	366	1:154434531-154434895	NC_000003.12:17665530-17665895	mUCE.0578
NW_004470287.1:362241-362480	240	1:154634731-154634969	NC_000003.12:17836966-17837204	mUCE.0579
NW_004470287.1:504828-505042	215	1:154740275-154740487	NC_000003.12:17935096-17935309	mUCE.0580
NW_004491828.1:289788-290169	382	1:85975291-85975671	NC_000003.12:180719231-180719611	mUCE.0581
NW_004491828.1:530217-530489	273	1:85768819-85769086	NC_000003.12:180970131-180970400	mUCE.0582
NW_004491828.1:645619-646200	582	1:85712154-85712733	NC_000003.12:181056238-181056818	mUCE.0583
NW_004491828.1:818214-819010	797	1:85585126-85585917	NC_000003.12:181174376-181175166	mUCE.0584
NW_004491828.1:884430-884731	302	1:85516163-85516463	NC_000003.12:181239340-181239640	mUCE.0585
NW_004491828.1:1090646-1090906	261	1:85290995-85291247	NC_000003.12:181442838-181443096	mUCE.0586
NW_004491828.1:1161583-1161927	345	1:85228553-85228896	NC_000003.12:181497422-181497765	mUCE.0587
NW_004491828.1:1213993-1214362	370	1:85160771-85161138	NC_000003.12:181561404-181561772	mUCE.0588
NW_004491828.1:1268315-1268532	218	1:85111847-85112065	NC_000003.12:181610203-181610417	mUCE.0589
NW_004491828.1:1283753-1284025	273	1:85095629-85095895	NC_000003.12:181626190-181626457	mUCE.0590
NW_004470287.1:793519-793732	214	1:155059742-155059954	NC_000003.12:18185348-18185560	mUCE.0591
NW_004470287.1:798382-798679	298	1:155064646-155064942	NC_000003.12:18189745-18190039	mUCE.0592
NW_004491828.1:1840262-1840531	270	1:84601215-84601484	NC_000003.12:182143609-182143877	mUCE.0593
NW_004491828.1:2338747-2339009	263	1:84115126-84115383	NC_000003.12:182596755-182597007	mUCE.0594
NW_004470287.1:948316-948563	248	1:155265354-155265601	NC_000003.12:18348087-18348333	mUCE.0595
NW_004470287.1:1003038-1003300	263	1:155323836-155324096	NC_000003.12:18402880-18403140	mUCE.0596
NW_004470287.1:1003302-1003532	231	1:155324099-155324331	NC_000003.12:18403143-18403371	mUCE.0597
NW_004486358.1:1889723-1889958	236	1:80859601-80859835	NC_000003.12:186054489-186054722	mUCE.0598
NW_004482405.1:1359435-1359666	232	1:79317921-79318149	NC_000003.12:187721718-187721947	mUCE.0599
NW_004470287.1:1514761-1515062	302	1:155881089-155881389	NC_000003.12:18857324-18857624	mUCE.0600
NW_004470287.1:1515064-1515429	366	1:155881392-155881756	NC_000003.12:18857627-18857991	mUCE.0601
NW_004470287.1:1539359-1539696	338	1:155903722-155904055	NC_000003.12:18875379-18875712	mUCE.0602
NW_004483212.1:113327-113533	207	1:77924414-77924619	NC_000003.12:189139736-189139941	mUCE.0603
NW_004470287.1:1630364-1630632	269	1:156010599-156010864	NC_000003.12:18986886-18987153	mUCE.0604
NW_004483212.1:827030-827234	205	1:77165926-77166129	NC_000003.12:189890712-189890906	mUCE.0605
NW_004470287.1:1635569-1635800	232	1:156017116-156017344	NC_000003.12:18992662-18992890	mUCE.0606
NW_004470287.1:1640284-1640489	206	1:156021938-156022140	NC_000003.12:19000545-19000747	mUCE.0607
NW_004495838.1:2387360-2387660	301	1:73097222-73097520	NC_000003.12:194139320-194139618	mUCE.0608
NW_004462803.1:895158-895364	207	27:1298081-1298286	NC_000003.12:21510909-21511114	mUCE.0609
NW_004462803.1:1023174-1023401	228	27:1429967-1430189	NC_000003.12:21621176-21621400	mUCE.0610
NW_004475288.1:1270294-1270512	219	27:3665938-3666155	NC_000003.12:23967811-23968028	mUCE.0611
NW_004496569.1:113956-114156	201	27:4828261-4828460	NC_000003.12:25037046-25037245	mUCE.0612
NW_004496569.1:524024-524306	283	27:5270254-5270533	NC_000003.12:25436294-25436572	mUCE.0613
NW_004499721.1:50525-50732	208	27:5463131-5463333	NC_000003.12:25618398-25618604	mUCE.0614
NW_004501389.1:3134839-3135042	204	22:23574242-23574444	NC_000003.12:2645388-2645590	mUCE.0615
NW_004483462.1:1440409-1440678	270	22:7563698-7563965	NC_000003.12:33408590-33408855	mUCE.0616
NW_004483462.1:2209274-2209496	223	22:8132796-8133016	NC_000003.12:34021472-34021693	mUCE.0617
NW_004483462.1:4106706-4106914	209	22:9544058-9544265	NC_000003.12:35706942-35707144	mUCE.0618
NW_004493541.1:84770-84977	208	22:13716486-13716690	NC_000003.12:41240103-41240315	mUCE.0619
NW_004467831.1:1701078-1701284	207	22:50391594-50391799	NC_000003.12:49967136-49967341	mUCE.0620
NW_004467831.1:1586420-1586691	272	22:50314787-50315056	NC_000003.12:50100408-50100676	mUCE.0621
NW_004492236.1:224643-224954	312	22:42025332-42025642	NC_000003.12:59307523-59307833	mUCE.0622
NW_004500555.1:836122-836360	239	22:41017358-41017595	NC_000003.12:60289471-60289705	mUCE.0623
NW_004500555.1:2899367-2899653	287	22:38909267-38909552	NC_000003.12:62365486-62365771	mUCE.0624
NW_004500555.1:2910221-2910561	341	22:38898509-38898839	NC_000003.12:62376083-62376422	mUCE.0625
NW_004500555.1:2948722-2949031	310	22:38857704-38858005	NC_000003.12:62421327-62421630	mUCE.0626
NW_004500555.1:3064004-3064256	253	22:38745512-38745749	NC_000003.12:62530951-62531193	mUCE.0627
NW_004500555.1:4588960-4589206	247	22:37464065-37464297	NC_000003.12:63990150-63990395	mUCE.0628
NW_004491000.1:246482-246687	206	22:36018455-36018658	NC_000003.12:65358936-65359138	mUCE.0629
NW_004499773.1:2353022-2353309	288	22:31470611-31470898	NC_000003.12:70042633-70042918	mUCE.0630
NW_004499773.1:2328333-2328610	278	22:31447560-31447836	NC_000003.12:70066060-70066336	mUCE.0631
NW_004499773.1:1809393-1809809	417	22:31013179-31013594	NC_000003.12:70523428-70523843	mUCE.0632
NW_004499773.1:1492575-1493354	780	22:30731131-30731909	NC_000003.12:70822462-70823240	mUCE.0633
NW_004499773.1:1455932-1456165	234	22:30702749-30702981	NC_000003.12:70853838-70854070	mUCE.0634
NW_004499773.1:1338302-1338535	234	22:30600058-30600292	NC_000003.12:70958903-70959133	mUCE.0635
NW_004499773.1:1313531-1313867	337	22:30574574-30574912	NC_000003.12:70985665-70986001	mUCE.0636
NW_004499773.1:1296151-1296689	539	22:30557185-30557718	NC_000003.12:71003432-71003969	mUCE.0637
NW_004499773.1:1260482-1260716	235	22:30520022-30520252	NC_000003.12:71041891-71042121	mUCE.0638
NW_004499773.1:1168047-1168273	227	22:30425624-30425850	NC_000003.12:71136124-71136349	mUCE.0639
NW_004499773.1:1127186-1127397	212	22:30389490-30389696	NC_000003.12:71169317-71169527	mUCE.0640
NW_004499773.1:1126139-1126424	286	22:30388455-30388737	NC_000003.12:71170306-71170588	mUCE.0641
NW_004499773.1:1103850-1104132	283	22:30366677-30366956	NC_000003.12:71195525-71195804	mUCE.0642
NW_004499773.1:1061109-1061313	205	22:30313721-30313923	NC_000003.12:71242869-71243072	mUCE.0643
NW_004499773.1:989680-989928	249	22:30255303-30255550	NC_000003.12:71308177-71308424	mUCE.0644
NW_004499773.1:904477-904689	213	22:30177471-30177682	NC_000003.12:71392443-71392654	mUCE.0645
NW_004499773.1:842049-842341	293	22:30110267-30110554	NC_000003.12:71458877-71459167	mUCE.0646
NW_004464340.1:174624-174845	222	1:23581051-23581261	NC_000003.12:77564390-77564609	mUCE.0647
NW_004464340.1:263182-263414	233	1:23677331-23677561	NC_000003.12:77646070-77646296	mUCE.0648
NW_004461406.1:1006744-1006966	223	1:27348008-27348229	NC_000003.12:81095192-81095413	mUCE.0649
NW_004480587.1:72123-72385	263	22:16992365-16992626	NC_000003.12:9429826-9430087	mUCE.0650
NW_004480587.1:67747-67990	244	22:16987981-16988222	NC_000003.12:9434177-9434416	mUCE.0651
NW_004485243.1:954135-954355	221	6:21082313-21082532	NC_000004.12:104425053-104425272	mUCE.0652
NW_004485243.1:1013156-1013410	255	6:21031894-21032147	NC_000004.12:104471840-104472093	mUCE.0653
NW_004490381.1:1725124-1725335	212	6:16695243-16695453	NC_000004.12:108941328-108941538	mUCE.0654
NW_004500061.1:93515-93729	215	6:15144048-15144258	NC_000004.12:110634334-110634544	mUCE.0655
NW_004500061.1:898458-898720	263	6:14474310-14474571	NC_000004.12:111405935-111406196	mUCE.0656
NW_004497868.1:263468-263825	358	6:14283779-14284135	NC_000004.12:111635572-111635928	mUCE.0657
NW_004497868.1:1316347-1316640	294	6:13419810-13420099	NC_000004.12:112521555-112521844	mUCE.0658
NW_004497868.1:2277871-2278131	261	6:12638188-12638442	NC_000004.12:113331939-113332199	mUCE.0659
NW_004481763.1:3490493-3490709	217	17:45762357-45762572	NC_000004.12:133190389-133190604	mUCE.0660
NW_004483836.1:5091180-5091405	226	17:52443698-52443922	NC_000004.12:139058178-139058395	mUCE.0661
NW_004483836.1:3809057-3809415	359	17:53559682-53560039	NC_000004.12:140273706-140274063	mUCE.0662
NW_004476305.1:2272505-2272839	335	17:57403716-57404049	NC_000004.12:144649649-144649982	mUCE.0663
NW_004476305.1:1093268-1093503	236	17:58401489-58401723	NC_000004.12:145762988-145763222	mUCE.0664
NW_004476305.1:934558-934854	297	17:58587379-58587674	NC_000004.12:145938325-145938618	mUCE.0665
NW_004476305.1:150833-151159	327	17:59302143-59302468	NC_000004.12:146653108-146653433	mUCE.0666
NW_004484862.1:57564-57897	334	17:59473857-59474189	NC_000004.12:146829195-146829527	mUCE.0667
NW_004484862.1:117192-117470	279	17:59533480-59533757	NC_000004.12:146880669-146880944	mUCE.0668
NW_004484862.1:282284-282599	316	17:59704069-59704369	NC_000004.12:147037088-147037402	mUCE.0669
NW_004496456.1:479711-479929	219	17:61882843-61883060	NC_000004.12:148949902-148950119	mUCE.0670
NW_004483284.1:2794408-2794781	374	17:63358249-63358621	NC_000004.12:150315235-150315607	mUCE.0671
NW_004483284.1:2748484-2748728	245	17:63403565-63403807	NC_000004.12:150356000-150356243	mUCE.0672
NW_004483284.1:2543486-2543776	291	17:63546459-63546748	NC_000004.12:150497798-150498087	mUCE.0673
NW_004483284.1:2429423-2429658	236	17:63636543-63636777	NC_000004.12:150599540-150599774	mUCE.0674
NW_004483284.1:2332536-2332828	293	17:63717696-63717986	NC_000004.12:150679342-150679631	mUCE.0675
NW_004490362.1:498955-499299	345	6:110508070-110508412	NC_000004.12:15069603-15069946	mUCE.0676
NW_004483284.1:2030022-2030222	201	17:63986604-63986802	NC_000004.12:150937386-150937584	mUCE.0677
NW_004489083.1:139435-139671	237	17:28849584-28849799	NC_000004.12:156970956-156971191	mUCE.0678
NW_004466546.1:357539-357810	272	17:29319242-29319511	NC_000004.12:157361329-157361598	mUCE.0679
NW_004499960.1:1376601-1376857	257	17:69848865-69849120	NC_000004.12:165741013-165741268	mUCE.0680
NW_004487322.1:1482845-1483064	220	6:112119010-112119223	NC_000004.12:16652874-16653092	mUCE.0681
NW_004479988.1:253051-253282	232	8:6335778-6336008	NC_000004.12:174069921-174070151	mUCE.0682
NW_004487322.1:109180-109478	299	6:37933231-37933528	NC_000004.12:17882540-17882837	mUCE.0683
NW_004491595.1:2769230-2769465	236	27:33097881-33098112	NC_000004.12:181507861-181508095	mUCE.0684
NW_004491595.1:2911508-2911797	290	27:32860075-32860356	NC_000004.12:181660452-181660737	mUCE.0685
NW_004491595.1:3215346-3215606	261	27:32581190-32581445	NC_000004.12:181934290-181934543	mUCE.0686
NW_004491595.1:3412517-3412779	263	27:32407556-32407817	NC_000004.12:182127217-182127476	mUCE.0687
NW_004491595.1:3421868-3422156	289	27:32397465-32397752	NC_000004.12:182137337-182137624	mUCE.0688
NW_004491595.1:3777019-3777341	323	27:32044435-32044756	NC_000004.12:182495657-182495977	mUCE.0689
NW_004499071.1:1446950-1447199	250	27:30895700-30895948	NC_000004.12:184023081-184023328	mUCE.0690
NW_004492244.1:688541-688818	278	6:42731285-42731557	NC_000004.12:22736011-22736286	mUCE.0691
NW_004480812.1:2708374-2708595	222	6:43800998-43801215	NC_000004.12:23794194-23794414	mUCE.0692
NW_004480812.1:2687062-2687301	240	6:43824957-43825195	NC_000004.12:23818363-23818601	mUCE.0693
NW_004480812.1:2679411-2679669	259	6:43832804-43833057	NC_000004.12:23824267-23824524	mUCE.0694
NW_004480812.1:2636703-2636935	233	6:43879656-43879885	NC_000004.12:23866286-23866515	mUCE.0695
NW_004480812.1:2627194-2627407	214	6:43889804-43890016	NC_000004.12:23876054-23876266	mUCE.0696
NW_004480812.1:2307395-2307741	347	6:44233687-44234032	NC_000004.12:24192589-24192934	mUCE.0697
NW_004480812.1:2228086-2228287	202	6:44328607-44328807	NC_000004.12:24275252-24275452	mUCE.0698
NW_004480812.1:2066754-2067024	271	6:44505371-44505639	NC_000004.12:24464139-24464406	mUCE.0699
NW_004480812.1:2014983-2015582	600	6:44553711-44554307	NC_000004.12:24527456-24528052	mUCE.0700
NW_004499919.1:350420-350696	277	6:116522336-116522598	NC_000004.12:2689456-2689729	mUCE.0701
NW_004481261.1:5354301-5354501	201	6:50859796-50859992	NC_000004.12:31145469-31145663	mUCE.0702
NW_004481261.1:5353140-5353392	253	6:50860867-50861116	NC_000004.12:31146564-31146813	mUCE.0703
NW_004480360.1:852714-852949	236	6:58508130-58508364	NC_000004.12:38667106-38667340	mUCE.0704
NW_004462483.1:2004509-2004763	255	6:61219466-61219719	NC_000004.12:41748091-41748344	mUCE.0705
NW_004462483.1:2143313-2143530	218	6:61343756-61343972	NC_000004.12:41873004-41873220	mUCE.0706
NW_004462483.1:2458466-2458873	408	6:61570200-61570606	NC_000004.12:42148301-42148707	mUCE.0707
NW_004462483.1:2466582-2466823	242	6:61577262-61577502	NC_000004.12:42155162-42155401	mUCE.0708
NW_004462483.1:2746313-2746613	301	6:61843223-61843522	NC_000004.12:42451946-42452245	mUCE.0709
NW_004463212.1:313399-313648	250	6:104944600-104944848	NC_000004.12:4491950-4492195	mUCE.0710
NW_004463212.1:292764-293207	444	6:104921068-104921510	NC_000004.12:4516013-4516455	mUCE.0711
NW_004483278.1:1972030-1972240	211	6:67770728-67770937	NC_000004.12:48549452-48549660	mUCE.0712
NW_004480540.1:3577078-3577303	226	6:69490553-69490774	NC_000004.12:53391339-53391563	mUCE.0713
NW_004480540.1:2957015-2957296	282	6:70093178-70093458	NC_000004.12:54013915-54014194	mUCE.0714
NW_004480540.1:2890961-2891506	546	6:70173701-70174243	NC_000004.12:54096026-54096567	mUCE.0715
NW_004480540.1:447151-447384	234	6:72381383-72381612	NC_000004.12:56410431-56410659	mUCE.0716
NW_004502466.1:749913-750135	223	6:73381761-73381982	NC_000004.12:57415658-57415879	mUCE.0717
NW_004476814.1:4238156-4238386	231	6:78141204-78141433	NC_000004.12:62028776-62029005	mUCE.0718
NW_004476814.1:4191702-4191942	241	6:78191113-78191351	NC_000004.12:62068011-62068250	mUCE.0719
NW_004482342.1:77918-78149	232	6:81655897-81656128	NC_000004.12:65495358-65495588	mUCE.0720
NW_004495879.1:151283-151562	280	6:88781535-88781813	NC_000004.12:73139474-73139749	mUCE.0721
NW_004495879.1:214501-214715	215	6:88844594-88844807	NC_000004.12:73222943-73223156	mUCE.0722
NW_004481811.1:382041-382307	267	6:92884811-92885076	NC_000004.12:77713442-77713704	mUCE.0723
NW_004483432.1:957970-958218	249	6:94263230-94263476	NC_000004.12:79050549-79050796	mUCE.0724
NW_004483432.1:971409-971633	225	6:94276595-94276818	NC_000004.12:79063933-79064156	mUCE.0725
NW_004483432.1:1264956-1265168	213	6:94488772-94488983	NC_000004.12:79308439-79308651	mUCE.0726
NW_004483432.1:1336809-1337088	280	6:94556470-94556748	NC_000004.12:79385710-79385988	mUCE.0727
NW_004483432.1:1378306-1378602	297	6:94602375-94602669	NC_000004.12:79413547-79413842	mUCE.0728
NW_004483432.1:1412532-1412775	244	6:94639853-94640095	NC_000004.12:79453594-79453836	mUCE.0729
NW_004483432.1:2009916-2010153	238	6:95055412-95055648	NC_000004.12:79904472-79904708	mUCE.0730
NW_004489501.1:57460-57803	344	6:97609519-97609861	NC_000004.12:82356489-82356831	mUCE.0731
NW_004484823.1:1619567-1619777	211	6:98987458-98987667	NC_000004.12:83779347-83779556	mUCE.0732
NW_004484823.1:1619779-1620188	410	6:98987670-98988078	NC_000004.12:83779559-83779967	mUCE.0733
NW_004484823.1:1702613-1702839	227	6:99046851-99047076	NC_000004.12:83832229-83832454	mUCE.0734
NW_004484823.1:2354855-2355275	421	6:99548795-99549208	NC_000004.12:84324456-84324874	mUCE.0735
NW_004484823.1:2397649-2398090	442	6:99586554-99586992	NC_000004.12:84379034-84379472	mUCE.0736
NW_004484823.1:2472921-2473285	365	6:99666441-99666797	NC_000004.12:84443487-84443846	mUCE.0737
NW_004484823.1:2518550-2518785	236	6:99722921-99723154	NC_000004.12:84480640-84480873	mUCE.0738
NW_004483386.1:1020013-1020244	232	6:31300986-31301215	NC_000004.12:93774341-93774569	mUCE.0739
NW_004483386.1:728361-728573	213	6:31043238-31043446	NC_000004.12:94062207-94062417	mUCE.0740
NW_004504100.1:209154-209383	230	7:7907146-7907374	NC_000005.10:103679847-103680072	mUCE.0741
NW_004502975.1:3261501-3261708	208	7:4204125-4204333	NC_000005.10:107379787-107379993	mUCE.0742
NW_004502975.1:2728286-2728510	225	7:3704562-3704787	NC_000005.10:107862352-107862575	mUCE.0743
NW_004502975.1:2565033-2565273	241	7:3545698-3545937	NC_000005.10:108006801-108007040	mUCE.0744
NW_004487709.1:878869-879074	206	20:62340821-62341024	NC_000005.10:10972500-10972701	mUCE.0745
NW_004482336.1:172786-173029	244	10:99075617-99075858	NC_000005.10:111756055-111756296	mUCE.0746
NW_004497031.1:197687-197969	283	10:100093567-100093845	NC_000005.10:112818883-112819165	mUCE.0747
NW_004482433.1:112876-113126	251	10:98852848-98853094	NC_000005.10:113524946-113525195	mUCE.0748
NW_004482433.1:1140641-1140849	209	10:97985098-97985303	NC_000005.10:114361931-114362138	mUCE.0749
NW_004477198.1:189056-189308	253	7:79836817-79837066	NC_000005.10:122997455-122997705	mUCE.0750
NW_004477198.1:318539-318765	227	7:79950491-79950715	NC_000005.10:123106661-123106886	mUCE.0751
NW_004477198.1:1090403-1090710	308	7:80708042-80708347	NC_000005.10:123809667-123809973	mUCE.0752
NW_004477198.1:1524171-1524378	208	7:81156595-81156792	NC_000005.10:124200003-124200209	mUCE.0753
NW_004477198.1:1549549-1549951	403	7:81188621-81189022	NC_000005.10:124234762-124235162	mUCE.0754
NW_004477198.1:1843579-1843814	236	7:81488678-81488911	NC_000005.10:124575828-124576062	mUCE.0755
NW_004477198.1:1924890-1925105	216	7:81545086-81545300	NC_000005.10:124646657-124646870	mUCE.0756
NW_004477198.1:2144025-2144238	214	7:81735158-81735367	NC_000005.10:124866900-124867112	mUCE.0757
NW_004477198.1:3219357-3219649	293	7:82771060-82771343	NC_000005.10:125898926-125899217	mUCE.0758
NW_004480981.1:3155595-3155808	214	7:88052370-88052576	NC_000005.10:131974851-131975063	mUCE.0759
NW_004489876.1:1355833-1356081	249	7:64232058-64232306	NC_000005.10:134790036-134790280	mUCE.0760
NW_004489876.1:1183380-1183598	219	7:64112494-64112693	NC_000005.10:134950112-134950329	mUCE.0761
NW_004489876.1:830265-830601	337	7:63811346-63811679	NC_000005.10:135264419-135264751	mUCE.0762
NW_004489876.1:701690-701899	210	7:63676317-63676525	NC_000005.10:135367204-135367399	mUCE.0763
NW_004489876.1:534503-534760	258	7:63544580-63544837	NC_000005.10:135477144-135477395	mUCE.0764
NW_004489876.1:450248-450450	203	7:63490523-63490721	NC_000005.10:135534548-135534748	mUCE.0765
NW_004466019.1:109333-109580	248	7:61030513-61030755	NC_000005.10:138018929-138019170	mUCE.0766
NW_004482370.1:268146-268346	201	7:60691817-60692014	NC_000005.10:138425393-138425590	mUCE.0767
NW_004492393.1:663872-664133	262	7:59889189-59889449	NC_000005.10:139307406-139307666	mUCE.0768
NW_004492393.1:992030-992239	210	7:59624130-59624339	NC_000005.10:139676987-139677195	mUCE.0769
NW_004492393.1:1021742-1021977	236	7:59595229-59595463	NC_000005.10:139709279-139709510	mUCE.0770
NW_004492393.1:1062919-1063146	228	7:59555057-59555283	NC_000005.10:139764463-139764689	mUCE.0771
NW_004492393.1:1432616-1432871	256	7:59192984-59193236	NC_000005.10:140119191-140119443	mUCE.0772
NW_004492393.1:1442069-1442300	232	7:59184373-59184603	NC_000005.10:140127802-140128032	mUCE.0773
NW_004468898.1:1360201-1360412	212	7:57186933-57187138	NC_000005.10:142316238-142316445	mUCE.0774
NW_004490966.1:577321-577533	213	7:52984827-52985038	NC_000005.10:146288901-146289112	mUCE.0775
NW_004490966.1:681818-682019	202	7:52906337-52906537	NC_000005.10:146368595-146368795	mUCE.0776
NW_004490966.1:1186421-1186654	234	7:52356885-52357117	NC_000005.10:146877965-146878197	mUCE.0777
NW_004480548.1:556645-556923	279	7:50570269-50570546	NC_000005.10:148427594-148427871	mUCE.0778
NW_004466933.1:326090-326400	311	7:49543709-49544015	NC_000005.10:149517730-149518037	mUCE.0779
NW_004472603.1:1023199-1023403	205	7:45278753-45278956	NC_000005.10:153794554-153794757	mUCE.0780
NW_004470809.1:1870485-1870695	211	7:41267078-41267287	NC_000005.10:157648642-157648851	mUCE.0781
NW_004470809.1:1358306-1358589	284	7:40816199-40816481	NC_000005.10:158162829-158163108	mUCE.0782
NW_004470809.1:989238-989586	349	7:40461264-40461612	NC_000005.10:158532003-158532351	mUCE.0783
NW_004470809.1:767440-767714	275	7:40257967-40258240	NC_000005.10:158732326-158732600	mUCE.0784
NW_004470809.1:614813-615046	234	7:40098446-40098678	NC_000005.10:158882062-158882294	mUCE.0785
NW_004470809.1:584848-585255	408	7:40068543-40068949	NC_000005.10:158914209-158914615	mUCE.0786
NW_004470809.1:584481-584708	228	7:40068180-40068404	NC_000005.10:158914737-158914961	mUCE.0787
NW_004470809.1:535375-535580	206	7:40014178-40014379	NC_000005.10:158968309-158968507	mUCE.0788
NW_004470809.1:424204-424435	232	7:39902873-39903102	NC_000005.10:159082361-159082590	mUCE.0789
NW_004482872.1:1517246-1517482	237	7:34143446-34143681	NC_000005.10:164578976-164579211	mUCE.0790
NW_004482872.1:2080390-2080699	310	7:33599385-33599693	NC_000005.10:165090118-165090427	mUCE.0791
NW_004482872.1:2135547-2135875	329	7:33545803-33546129	NC_000005.10:165138151-165138478	mUCE.0792
NW_004482872.1:3239622-3239842	221	7:32484515-32484734	NC_000005.10:166192063-166192281	mUCE.0793
NW_004482872.1:3776496-3776768	273	7:31894174-31894446	NC_000005.10:166699667-166699938	mUCE.0794
NW_004482872.1:3814903-3815103	201	7:31868295-31868494	NC_000005.10:166725661-166725860	mUCE.0795
NW_004482872.1:4458841-4459160	320	7:31187151-31187469	NC_000005.10:167413699-167414018	mUCE.0796
NW_004482872.1:4564136-4564357	222	7:31077700-31077915	NC_000005.10:167516744-167516962	mUCE.0797
NW_004482872.1:4910744-4910965	222	7:30706225-30706445	NC_000005.10:167861916-167862135	mUCE.0798
NW_004482872.1:4955264-4955576	313	7:30652523-30652834	NC_000005.10:167905626-167905935	mUCE.0799
NW_004482872.1:5135004-5135336	333	7:30445527-30445858	NC_000005.10:168110883-168111214	mUCE.0800
NW_004482872.1:5255799-5256055	257	7:30318866-30319121	NC_000005.10:168230137-168230392	mUCE.0801
NW_004474053.1:583558-583882	325	20:2969235-2969558	NC_000005.10:170990483-170990806	mUCE.0802
NW_004474053.1:583102-583438	337	20:2969692-2970027	NC_000005.10:170990940-170991275	mUCE.0803
NW_004474053.1:561948-562155	208	20:2994285-2994484	NC_000005.10:171028814-171029019	mUCE.0804
NW_004474053.1:409790-410159	370	20:3127393-3127761	NC_000005.10:171201342-171201710	mUCE.0805
NW_004474053.1:408484-409042	559	20:3128469-3129026	NC_000005.10:171202414-171202971	mUCE.0806
NW_004474053.1:374277-374513	237	20:3155497-3155732	NC_000005.10:171240904-171241130	mUCE.0807
NW_004474053.1:345065-345303	239	20:3178285-3178518	NC_000005.10:171269183-171269419	mUCE.0808
NW_004474053.1:338301-338545	245	20:3188781-3189018	NC_000005.10:171276148-171276388	mUCE.0809
NW_004481779.1:1141964-1142292	329	20:3822721-3823048	NC_000005.10:171957444-171957770	mUCE.0810
NW_004481260.1:65842-66078	237	7:71336157-71336393	NC_000005.10:178210067-178210300	mUCE.0811
NW_004483765.1:1326642-1326897	256	20:42641165-42641419	NC_000005.10:30926487-30926739	mUCE.0812
NW_004459548.1:825866-826107	242	20:37197379-37197616	NC_000005.10:37006370-37006595	mUCE.0813
NW_004459548.1:872667-872872	206	20:37157981-37158182	NC_000005.10:37048080-37048284	mUCE.0814
NW_004459548.1:888822-889081	260	20:37143971-37144229	NC_000005.10:37064474-37064732	mUCE.0815
NW_004459548.1:889709-890012	304	20:37143049-37143351	NC_000005.10:37065347-37065649	mUCE.0816
NW_004485155.1:52581-52810	230	20:31537680-31537908	NC_000005.10:43161593-43161821	mUCE.0817
NW_004458031.1:2124637-2124853	217	20:68382199-68382414	NC_000005.10:4628182-4628397	mUCE.0818
NW_004458031.1:2038250-2038494	245	20:68294116-68294350	NC_000005.10:4722449-4722691	mUCE.0819
NW_004475584.1:2205629-2206195	567	20:27399463-27400028	NC_000005.10:51664926-51665491	mUCE.0820
NW_004475584.1:2003657-2003886	230	20:27225008-27225234	NC_000005.10:51860629-51860857	mUCE.0821
NW_004475584.1:1879892-1880131	240	20:27081746-27081982	NC_000005.10:52010462-52010700	mUCE.0822
NW_004475584.1:1851974-1852250	277	20:27056641-27056916	NC_000005.10:52043321-52043596	mUCE.0823
NW_004475584.1:1571926-1572241	316	20:26830787-26831099	NC_000005.10:52269269-52269583	mUCE.0824
NW_004458031.1:1412082-1412297	216	20:67866450-67866662	NC_000005.10:5236892-5237104	mUCE.0825
NW_004475584.1:185803-186012	210	20:25618885-25619093	NC_000005.10:53485832-53486039	mUCE.0826
NW_004501985.1:329805-330159	355	20:24941936-24942289	NC_000005.10:54215240-54215593	mUCE.0827
NW_004480302.1:274482-274694	213	20:22415586-22415793	NC_000005.10:56865798-56866008	mUCE.0828
NW_004480302.1:722256-722462	207	20:22092451-22092653	NC_000005.10:57237039-57237241	mUCE.0829
NW_004480302.1:5654849-5655059	211	20:17637771-17637980	NC_000005.10:61736747-61736956	mUCE.0830
NW_004480302.1:5656004-5656449	446	20:17636365-17636809	NC_000005.10:61737894-61738335	mUCE.0831
NW_004482962.1:125921-126151	231	20:66707806-66708035	NC_000005.10:6449023-6449252	mUCE.0832
NW_004482038.1:1455063-1455263	201	20:14218337-14218536	NC_000005.10:65268607-65268806	mUCE.0833
NW_004482038.1:1434150-1434362	213	20:14186626-14186833	NC_000005.10:65297125-65297329	mUCE.0834
NW_004482038.1:1372872-1373078	207	20:14160102-14160307	NC_000005.10:65329612-65329817	mUCE.0835
NW_004496952.1:3202948-3203155	208	20:9118112-9118318	NC_000005.10:72507368-72507574	mUCE.0836
NW_004496952.1:3662351-3662620	270	20:8744933-8745201	NC_000005.10:72910243-72910511	mUCE.0837
NW_004496952.1:4122032-4122294	263	20:8346689-8346948	NC_000005.10:73300092-73300352	mUCE.0838
NW_004481357.1:117424-117648	225	10:92499872-92500091	NC_000005.10:77562029-77562251	mUCE.0839
NW_004481357.1:107903-108123	221	10:92491298-92491516	NC_000005.10:77570835-77571054	mUCE.0840
NW_004481357.1:22639-22840	202	10:92448550-92448750	NC_000005.10:77630313-77630513	mUCE.0841
NW_004481357.1:18109-18529	421	10:92445046-92445462	NC_000005.10:77633925-77634339	mUCE.0842
NW_004481357.1:13632-13972	341	10:92440577-92440916	NC_000005.10:77638501-77638840	mUCE.0843
NW_004481357.1:11119-11400	282	10:92437980-92438248	NC_000005.10:77641140-77641409	mUCE.0844
NW_004470121.1:46827-47201	375	10:92359413-92359785	NC_000005.10:77725457-77725830	mUCE.0845
NW_004470121.1:46441-46717	277	10:92359026-92359301	NC_000005.10:77725940-77726215	mUCE.0846
NW_004480434.1:11590-11797	208	10:92325541-92325746	NC_000005.10:77769665-77769871	mUCE.0847
NW_004480434.1:97758-98094	337	10:92268084-92268419	NC_000005.10:77844315-77844650	mUCE.0848
NW_004480434.1:105581-106019	439	10:92260210-92260647	NC_000005.10:77852135-77852572	mUCE.0849
NW_004480434.1:123605-123826	222	10:92245401-92245622	NC_000005.10:77868769-77868990	mUCE.0850
NW_004480434.1:124049-124323	275	10:92244909-92245182	NC_000005.10:77869212-77869485	mUCE.0851
NW_004480434.1:127415-127712	298	10:92240147-92240433	NC_000005.10:77874474-77874767	mUCE.0852
NW_004480434.1:182524-182837	314	10:92195698-92196010	NC_000005.10:77912578-77912890	mUCE.0853
NW_004480434.1:250939-251325	387	10:92142731-92143113	NC_000005.10:77962117-77962499	mUCE.0854
NW_004480434.1:259110-259457	348	10:92133514-92133860	NC_000005.10:77972233-77972579	mUCE.0855
NW_004480434.1:301438-301708	271	10:92090086-92090358	NC_000005.10:78016854-78017123	mUCE.0856
NW_004480434.1:301710-302112	403	10:92089682-92090083	NC_000005.10:78017126-78017521	mUCE.0857
NW_004480434.1:332395-332671	277	10:92059779-92060054	NC_000005.10:78050979-78051254	mUCE.0858
NW_004480434.1:332673-332884	212	10:92059569-92059776	NC_000005.10:78051257-78051467	mUCE.0859
NW_004480434.1:395210-395466	257	10:92000709-92000961	NC_000005.10:78128233-78128488	mUCE.0860
NW_004480434.1:396540-396783	244	10:91999416-91999658	NC_000005.10:78129532-78129775	mUCE.0861
NW_004475116.1:2307639-2307865	227	7:28770630-28770855	NC_000005.10:81851538-81851757	mUCE.0862
NW_004501824.1:19298-19544	247	7:28451789-28452031	NC_000005.10:82185734-82185977	mUCE.0863
NW_004483405.1:2799947-2800162	216	7:22907777-22908000	NC_000005.10:88046256-88046470	mUCE.0864
NW_004483405.1:3355433-3355715	283	7:22462122-22462403	NC_000005.10:88539773-88540054	mUCE.0865
NW_004483405.1:3529797-3530087	291	7:22285938-22286227	NC_000005.10:88718232-88718521	mUCE.0866
NW_004483405.1:3571427-3571689	263	7:22241444-22241705	NC_000005.10:88760909-88761170	mUCE.0867
NW_004483405.1:3593336-3593542	207	7:22217631-22217834	NC_000005.10:88786150-88786354	mUCE.0868
NW_004483405.1:3908486-3908712	227	7:21908969-21909194	NC_000005.10:89090081-89090306	mUCE.0869
NW_004483405.1:5195905-5196153	249	7:20651232-20651478	NC_000005.10:90356757-90357004	mUCE.0870
NW_004483405.1:6701093-6701410	318	7:19435502-19435818	NC_000005.10:91632971-91633287	mUCE.0871
NW_004483405.1:7015249-7015614	366	7:19167069-19167433	NC_000005.10:91898898-91899262	mUCE.0872
NW_004483405.1:7099413-7099646	234	7:19091725-19091954	NC_000005.10:91977607-91977836	mUCE.0873
NW_004483405.1:7137549-7137800	252	7:19061374-19061625	NC_000005.10:92002465-92002715	mUCE.0874
NW_004483405.1:7643085-7643608	524	7:18584823-18585345	NC_000005.10:92468312-92468831	mUCE.0875
NW_004483405.1:7818900-7819420	521	7:18386801-18387314	NC_000005.10:92634745-92635262	mUCE.0876
NW_004483405.1:7908846-7909194	349	7:18306793-18307140	NC_000005.10:92712014-92712361	mUCE.0877
NW_004483405.1:7910113-7910349	237	7:18305647-18305882	NC_000005.10:92713278-92713510	mUCE.0878
NW_004483405.1:7913173-7913382	210	7:18302821-18303029	NC_000005.10:92716071-92716279	mUCE.0879
NW_004483405.1:8318021-8318238	218	7:17953836-17954050	NC_000005.10:93088699-93088915	mUCE.0880
NW_004483405.1:8479897-8480156	260	7:17812825-17813083	NC_000005.10:93250577-93250835	mUCE.0881
NW_004483405.1:8625037-8625319	283	7:17669131-17669412	NC_000005.10:93407059-93407340	mUCE.0882
NW_004483405.1:8931407-8931974	568	7:17414882-17415448	NC_000005.10:93675601-93676164	mUCE.0883
NW_004483405.1:9151699-9152090	392	7:17234488-17234878	NC_000005.10:93890750-93891137	mUCE.0884
NW_004483405.1:9153909-9154502	594	7:17232067-17232659	NC_000005.10:93892948-93893539	mUCE.0885
NW_004483405.1:9155936-9156187	252	7:17230357-17230607	NC_000005.10:93894965-93895215	mUCE.0886
NW_004483405.1:9481122-9481434	313	7:16951451-16951760	NC_000005.10:94239966-94240277	mUCE.0887
NW_004483405.1:9499491-9499730	240	7:16933992-16934230	NC_000005.10:94253242-94253472	mUCE.0888
NW_004483405.1:9754053-9754257	205	7:16701136-16701339	NC_000005.10:94508558-94508761	mUCE.0889
NW_004483405.1:9813023-9813240	218	7:16655803-16656019	NC_000005.10:94562406-94562622	mUCE.0890
NW_004483405.1:10111388-10111762	375	7:16363546-16363919	NC_000005.10:94870798-94871171	mUCE.0891
NW_004480511.1:629855-630055	201	7:12550852-12551049	NC_000005.10:98855819-98856013	mUCE.0892
NW_004491363.1:493874-494112	239	9:36614108-36614343	NC_000006.12:100593061-100593298	mUCE.0893
NW_004481635.1:1002207-1002420	214	9:35857930-35858143	NC_000006.12:101404952-101405164	mUCE.0894
NW_004481635.1:407806-408026	221	9:35294485-35294704	NC_000006.12:101889637-101889856	mUCE.0895
NW_004491175.1:881325-881585	261	23:4700726-4700985	NC_000006.12:10389984-10390243	mUCE.0896
NW_004491175.1:877178-877397	220	23:4704986-4705204	NC_000006.12:10394440-10394658	mUCE.0897
NW_004491175.1:865492-865817	326	23:4716476-4716788	NC_000006.12:10405796-10406115	mUCE.0898
NW_004482865.1:2640725-2640937	213	9:29869045-29869256	NC_000006.12:107493231-107493442	mUCE.0899
NW_004482865.1:2003745-2004062	318	9:29311030-29311346	NC_000006.12:108118984-108119300	mUCE.0900
NW_004482865.1:1950586-1950796	211	9:29254521-29254729	NC_000006.12:108171167-108171376	mUCE.0901
NW_004482865.1:1730285-1730493	209	9:29080602-29080809	NC_000006.12:108365552-108365758	mUCE.0902
NW_004480669.1:1439909-1440114	206	9:26073230-26073434	NC_000006.12:111700073-111700277	mUCE.0903
NW_004463623.1:750483-750687	205	9:23871485-23871687	NC_000006.12:113861224-113861426	mUCE.0904
NW_004482293.1:1802992-1803252	261	9:13992369-13992629	NC_000006.12:124488144-124488402	mUCE.0905
NW_004472352.1:2789608-2789893	286	23:7323768-7324053	NC_000006.12:13621510-13621793	mUCE.0906
NW_004472352.1:2800261-2800461	201	23:7335886-7336082	NC_000006.12:13634388-13634587	mUCE.0907
NW_004482871.1:2224691-2224904	214	9:62438442-62438654	NC_000006.12:137432195-137432407	mUCE.0908
NW_004480420.1:429633-429845	213	9:64147102-64147313	NC_000006.12:139372257-139372466	mUCE.0909
NW_004492387.1:811734-812021	288	9:78792110-78792393	NC_000006.12:154833306-154833591	mUCE.0910
NW_004468923.1:378424-378644	221	9:79421549-79421768	NC_000006.12:155508577-155508796	mUCE.0911
NW_004482159.1:492120-492341	222	9:86169364-86169579	NC_000006.12:163455231-163455451	mUCE.0912
NW_004482159.1:386435-386704	270	9:86271131-86271396	NC_000006.12:163569674-163569940	mUCE.0913
NW_004501832.1:14323-14523	201	23:10182248-10182447	NC_000006.12:17033654-17033853	mUCE.0914
NW_004504035.1:181990-182193	204	23:10313017-10313212	NC_000006.12:17292758-17292960	mUCE.0915
NW_004485477.1:625756-626035	280	23:11325401-11325679	NC_000006.12:18663045-18663323	mUCE.0916
NW_004485477.1:1498651-1498949	299	23:12022085-12022382	NC_000006.12:19558202-19558499	mUCE.0917
NW_004485477.1:1809988-1810349	362	23:12293093-12293439	NC_000006.12:19860972-19861331	mUCE.0918
NW_004480936.1:248298-248545	248	23:14355045-14355286	NC_000006.12:22250145-22250389	mUCE.0919
NW_004480916.1:339599-339853	255	23:40003911-40004164	NC_000006.12:34646575-34646828	mUCE.0920
NW_004479335.1:582758-583098	341	23:38899338-38899661	NC_000006.12:35870232-35870570	mUCE.0921
NW_004479335.1:954750-954987	238	23:38595564-38595799	NC_000006.12:36210168-36210403	mUCE.0922
NW_004480471.1:20603-20826	224	23:37184077-37184300	NC_000006.12:37693317-37693539	mUCE.0923
NW_004481207.1:753272-753604	333	23:33515183-33515515	NC_000006.12:41467057-41467388	mUCE.0924
NW_004481207.1:698843-699067	225	23:33455171-33455393	NC_000006.12:41531891-41532114	mUCE.0925
NW_004481207.1:419133-419337	205	23:33198540-33198742	NC_000006.12:41798753-41798956	mUCE.0926
NW_004485459.1:306501-306712	212	23:31545230-31545433	NC_000006.12:43781894-43782103	mUCE.0927
NW_004472203.1:1322710-1322962	253	23:30166565-30166815	NC_000006.12:45433680-45433927	mUCE.0928
NW_004472203.1:1266677-1266966	290	23:30100943-30101225	NC_000006.12:45491902-45492190	mUCE.0929
NW_004459154.1:163186-163410	225	23:26108501-26108724	NC_000006.12:50464084-50464305	mUCE.0930
NW_004459154.1:103227-103435	209	23:26069002-26069209	NC_000006.12:50520290-50520497	mUCE.0931
NW_004459154.1:102986-103225	240	23:26068761-26068999	NC_000006.12:50520500-50520735	mUCE.0932
NW_004482944.1:26417-26741	325	23:26011538-26011860	NC_000006.12:50585242-50585563	mUCE.0933
NW_004482944.1:303718-303979	262	23:25789953-25790214	NC_000006.12:50821571-50821828	mUCE.0934
NW_004482944.1:308955-309187	233	23:25784739-25784970	NC_000006.12:50826895-50827124	mUCE.0935
NW_004482944.1:310597-310802	206	23:25783155-25783357	NC_000006.12:50828486-50828687	mUCE.0936
NW_004482944.1:313492-313731	240	23:25780418-25780645	NC_000006.12:50831202-50831440	mUCE.0937
NW_004482944.1:313753-313953	201	23:25780182-25780381	NC_000006.12:50831463-50831662	mUCE.0938
NW_004482944.1:336784-337227	444	23:25757365-25757807	NC_000006.12:50853937-50854379	mUCE.0939
NW_004482944.1:380511-380727	217	23:25724317-25724532	NC_000006.12:50890035-50890249	mUCE.0940
NW_004482944.1:739298-739500	203	23:25397279-25397480	NC_000006.12:51284105-51284304	mUCE.0941
NW_004482944.1:769035-769244	210	23:25372747-25372951	NC_000006.12:51306838-51307046	mUCE.0942
NW_004482944.1:918925-919155	231	23:25248919-25249148	NC_000006.12:51450589-51450818	mUCE.0943
NW_004483298.1:1636596-1636956	361	14:82043681-82044042	NC_000006.12:63646452-63646813	mUCE.0944
NW_004483155.1:65896-66354	459	14:89782311-89782768	NC_000006.12:69389050-69389507	mUCE.0945
NW_004481114.1:2797433-2797655	223	9:52021330-52021548	NC_000006.12:84642192-84642411	mUCE.0946
NW_004481580.1:305702-306037	336	23:3225489-3225823	NC_000006.12:8468814-8469148	mUCE.0947
NW_004481114.1:3046542-3046791	250	9:51771340-51771588	NC_000006.12:84883223-84883471	mUCE.0948
NW_004488399.1:162213-162497	285	9:51095364-51095647	NC_000006.12:85612192-85612475	mUCE.0949
NW_004488399.1:165173-165507	335	9:51092808-51093142	NC_000006.12:85614691-85615019	mUCE.0950
NW_004481580.1:504816-505031	216	23:3348399-3348605	NC_000006.12:8637939-8638153	mUCE.0951
NW_004491175.1:2616321-2616527	207	23:3553517-3553721	NC_000006.12:8862794-8862998	mUCE.0952
NW_004472605.1:3285433-3285777	345	9:47517308-47517648	NC_000006.12:90034403-90034732	mUCE.0953
NW_004491175.1:2202801-2203069	269	23:3831045-3831312	NC_000006.12:9200576-9200843	mUCE.0954
NW_004491175.1:1976271-1976479	209	23:3966750-3966956	NC_000006.12:9402114-9402316	mUCE.0955
NW_004491175.1:1855858-1856170	313	23:4050646-4050954	NC_000006.12:9509775-9510086	mUCE.0956
NW_004472706.1:440034-440235	202	9:39886599-39886799	NC_000006.12:97123817-97124016	mUCE.0957
NW_004472706.1:334998-335228	231	9:39789434-39789663	NC_000006.12:97215763-97215992	mUCE.0958
NW_004472706.1:206497-206832	336	9:39702736-39703070	NC_000006.12:97306495-97306828	mUCE.0959
NW_004472706.1:37353-37596	244	9:39575089-39575331	NC_000006.12:97466365-97466607	mUCE.0960
NW_004467618.1:2709190-2709442	253	9:39245108-39245359	NC_000006.12:97766096-97766347	mUCE.0961
NW_004467618.1:2861195-2861606	412	9:39078408-39078817	NC_000006.12:97914926-97915336	mUCE.0962
NW_004467618.1:2955348-2955604	257	9:38958974-38959229	NC_000006.12:98014958-98015213	mUCE.0963
NW_004467618.1:3099838-3100088	251	9:38855773-38856022	NC_000006.12:98136355-98136604	mUCE.0964
NW_004467618.1:3211383-3211691	309	9:38755733-38756040	NC_000006.12:98272002-98272309	mUCE.0965
NW_004467618.1:3214149-3214428	280	9:38752797-38753072	NC_000006.12:98274717-98274995	mUCE.0966
NW_004467618.1:3329562-3329798	237	9:38638577-38638812	NC_000006.12:98380641-98380876	mUCE.0967
NW_004467618.1:3492054-3492359	306	9:38505606-38505910	NC_000006.12:98547606-98547910	mUCE.0968
NW_004481518.1:1225983-1226294	312	9:38188814-38189124	NC_000006.12:98835818-98836128	mUCE.0969
NW_004481518.1:890821-891093	273	9:37899232-37899503	NC_000006.12:99116766-99117037	mUCE.0970
NW_004481518.1:686148-686406	259	9:37719974-37720230	NC_000006.12:99323435-99323691	mUCE.0971
NW_004491175.1:1390745-1391042	298	23:4340385-4340678	NC_000006.12:9933075-9933367	mUCE.0972
NW_004481518.1:268157-268394	238	9:37487510-37487743	NC_000006.12:99602699-99602935	mUCE.0973
NW_004481518.1:267051-267267	217	9:37486238-37486453	NC_000006.12:99604065-99604289	mUCE.0974
NW_004481518.1:264554-264879	326	9:37483583-37483907	NC_000006.12:99606490-99606814	mUCE.0975
NW_004475377.1:197343-197580	238	25:35828667-35828899	NC_000007.14:101984967-101985199	mUCE.0976
NW_004494807.1:2188049-2188275	227	4:75271521-75271746	NC_000007.14:103821236-103821461	mUCE.0977
NW_004462715.1:897602-897823	222	4:74076309-74076530	NC_000007.14:105040828-105041038	mUCE.0978
NW_004462715.1:825197-825462	266	4:74011135-74011401	NC_000007.14:105108505-105108762	mUCE.0979
NW_004462715.1:55260-55549	290	4:73341801-73342089	NC_000007.14:105876305-105876593	mUCE.0980
NW_004480751.1:1726559-1726819	261	4:63614865-63615119	NC_000007.14:111726766-111727023	mUCE.0981
NW_004463246.1:1374562-1374878	317	4:66169956-66170272	NC_000007.14:114412661-114412976	mUCE.0982
NW_004463246.1:1374968-1375184	217	NA	NC_000007.14:114413063-114413275	mUCE.0983
NW_004463246.1:1388299-1388627	329	4:66183784-66184106	NC_000007.14:114426395-114426721	mUCE.0984
NW_004463246.1:1393095-1393624	530	4:66188631-66189158	NC_000007.14:114431164-114431692	mUCE.0985
NW_004463246.1:1394056-1394363	308	4:66189575-66189880	NC_000007.14:114432104-114432410	mUCE.0986
NW_004463246.1:1394786-1395090	305	4:66190304-66190607	NC_000007.14:114432831-114433134	mUCE.0987
NW_004463246.1:1472320-1472565	246	4:66258885-66259129	NC_000007.14:114502663-114502907	mUCE.0988
NW_004463246.1:1496888-1497207	320	4:66288064-66288380	NC_000007.14:114530114-114530432	mUCE.0989
NW_004463246.1:1500450-1500652	203	4:66292023-66292222	NC_000007.14:114533314-114533513	mUCE.0990
NW_004463246.1:1536663-1536929	267	4:66343805-66344070	NC_000007.14:114569348-114569613	mUCE.0991
NW_004463246.1:1590853-1591108	256	4:66405405-66405659	NC_000007.14:114620258-114620512	mUCE.0992
NW_004463246.1:1592931-1593291	361	4:66407463-66407822	NC_000007.14:114622255-114622614	mUCE.0993
NW_004463246.1:1593894-1594208	315	4:66408424-66408737	NC_000007.14:114623204-114623517	mUCE.0994
NW_004463246.1:1623628-1623828	201	4:66445275-66445474	NC_000007.14:114653423-114653622	mUCE.0995
NW_004463246.1:1629983-1630389	407	4:66451623-66452026	NC_000007.14:114659708-114660113	mUCE.0996
NW_004463246.1:1631072-1631326	255	4:66452711-66452964	NC_000007.14:114660796-114661049	mUCE.0997
NW_004463246.1:1631767-1632184	418	4:66453409-66453822	NC_000007.14:114661497-114661910	mUCE.0998
NW_004463246.1:1657392-1657833	442	4:66487078-66487518	NC_000007.14:114687154-114687594	mUCE.0999
NW_004463246.1:1657835-1658038	204	4:66487521-66487723	NC_000007.14:114687597-114687799	mUCE.1000
NW_004463246.1:1662934-1663421	488	4:66492418-66492904	NC_000007.14:114692220-114692706	mUCE.1001
NW_004463246.1:2046452-2046672	221	4:66808654-66808873	NC_000007.14:115021679-115021898	mUCE.1002
NW_004463246.1:2136724-2136932	209	4:66922185-66922389	NC_000007.14:115123420-115123626	mUCE.1003
NW_004463246.1:2297269-2297571	303	4:67101960-67102261	NC_000007.14:115286739-115287039	mUCE.1004
NW_004463246.1:2310206-2310557	352	4:67113765-67114115	NC_000007.14:115300021-115300371	mUCE.1005
NW_004463246.1:2837866-2838311	446	4:67495367-67495811	NC_000007.14:115679060-115679504	mUCE.1006
NW_004463246.1:2864410-2864743	334	4:67524803-67525135	NC_000007.14:115707932-115708264	mUCE.1007
NW_004473852.1:320985-321220	236	4:69075796-69076030	NC_000007.14:117190072-117190306	mUCE.1008
NW_004501360.1:386771-387041	271	4:33472774-33473041	NC_000007.14:122304528-122304800	mUCE.1009
NW_004501360.1:363123-363550	428	4:33446662-33447088	NC_000007.14:122328639-122329066	mUCE.1010
NW_004501360.1:354394-354602	209	4:33437858-33438060	NC_000007.14:122336873-122337074	mUCE.1011
NW_004501360.1:139310-139527	218	4:33243452-33243669	NC_000007.14:122521167-122521383	mUCE.1012
NW_004458154.1:654-893	240	25:42324234-42324467	NC_000007.14:1229252-1229490	mUCE.1013
NW_004503364.1:5964-6215	252	25:42316154-42316396	NC_000007.14:1237614-1237864	mUCE.1014
NW_004503364.1:10209-10557	349	25:42314431-42314777	NC_000007.14:1239241-1239587	mUCE.1015
NW_004483531.1:706149-706358	210	4:28343105-28343313	NC_000007.14:127536129-127536331	mUCE.1016
NW_004483531.1:179468-179689	222	4:27884445-27884663	NC_000007.14:128030499-128030722	mUCE.1017
NW_004481312.1:1205685-1205901	217	4:26491356-26491571	NC_000007.14:129834838-129835053	mUCE.1018
NW_004481312.1:1487403-1487665	263	4:26252773-26253034	NC_000007.14:130096790-130097052	mUCE.1019
NW_004482736.1:1418666-1418899	234	4:24556096-24556328	NC_000007.14:131933830-131934062	mUCE.1020
NW_004482736.1:1624131-1624336	206	4:24392922-24393126	NC_000007.14:132123336-132123538	mUCE.1021
NW_004490764.1:146874-147548	675	4:98911960-98912630	NC_000007.14:13466814-13467487	mUCE.1022
NW_004483513.1:533762-533965	204	4:21626014-21626216	NC_000007.14:134866709-134866910	mUCE.1023
NW_004480666.1:213391-213612	222	4:98071476-98071694	NC_000007.14:14209918-14210138	mUCE.1024
NW_004480666.1:326751-327118	368	4:97930421-97930787	NC_000007.14:14340390-14340756	mUCE.1025
NW_004479330.1:468582-468853	272	4:6162182-6162450	NC_000007.14:151131222-151131490	mUCE.1026
NW_004482755.1:3574372-3574628	257	4:93259643-93259898	NC_000007.14:18643595-18643850	mUCE.1027
NW_004482755.1:3779228-3779563	336	4:93044341-93044672	NC_000007.14:18829252-18829583	mUCE.1028
NW_004482755.1:3779599-3779854	256	4:93044048-93044296	NC_000007.14:18829625-18829873	mUCE.1029
NW_004482755.1:3798653-3798999	347	4:93023165-93023509	NC_000007.14:18846713-18847058	mUCE.1030
NW_004482755.1:3947104-3947383	280	4:92859037-92859315	NC_000007.14:18995780-18996058	mUCE.1031
NW_004482755.1:4219606-4219848	243	4:92550631-92550867	NC_000007.14:19301407-19301645	mUCE.1032
NW_004481662.1:109937-110354	418	4:91027511-91027926	NC_000007.14:20790045-20790461	mUCE.1033
NW_004490230.1:384955-385234	280	4:90843703-90843980	NC_000007.14:20933289-20933566	mUCE.1034
NW_004490230.1:342043-342294	252	4:90804284-90804534	NC_000007.14:20980778-20981028	mUCE.1035
NW_004490230.1:291261-291568	308	4:90723403-90723709	NC_000007.14:21044983-21045289	mUCE.1036
NW_004490230.1:179924-180149	226	4:90619478-90619702	NC_000007.14:21150217-21150441	mUCE.1037
NW_004487412.1:103784-104089	306	4:90325097-90325401	NC_000007.14:21427999-21428302	mUCE.1038
NW_004480681.1:14637-15056	420	4:90246368-90246791	NC_000007.14:21514126-21514542	mUCE.1039
NW_004480424.1:979309-979527	219	4:50030189-50030406	NC_000007.14:25698829-25699046	mUCE.1040
NW_004480424.1:463294-463573	280	4:50471058-50471338	NC_000007.14:26191481-26191759	mUCE.1041
NW_004480424.1:240164-240519	356	4:50614055-50614410	NC_000007.14:26372127-26372480	mUCE.1042
NW_004480424.1:195762-195978	217	4:50662831-50663047	NC_000007.14:26419173-26419388	mUCE.1043
NW_004480424.1:175937-176155	219	4:50680281-50680498	NC_000007.14:26440751-26440968	mUCE.1044
NW_004480424.1:76407-76684	278	4:50781748-50782024	NC_000007.14:26533065-26533339	mUCE.1045
NW_004480424.1:15902-16203	302	4:50839098-50839395	NC_000007.14:26594318-26594618	mUCE.1046
NW_004504068.1:40290-40749	460	4:50891018-50891476	NC_000007.14:26657255-26657713	mUCE.1047
NW_004504068.1:50007-50345	339	4:50900558-50900894	NC_000007.14:26666837-26667174	mUCE.1048
NW_004504068.1:71549-71954	406	4:50924201-50924605	NC_000007.14:26689764-26690165	mUCE.1049
NW_004504068.1:190514-190890	377	4:51026579-51026950	NC_000007.14:26813510-26813883	mUCE.1050
NW_004504068.1:216610-216821	212	4:51052413-51052623	NC_000007.14:26841458-26841668	mUCE.1051
NW_004504068.1:459807-460105	299	4:51271936-51272231	NC_000007.14:27102296-27102593	mUCE.1052
NW_004504068.1:460109-460411	303	4:51272239-51272541	NC_000007.14:27102595-27102896	mUCE.1053
NW_004461066.1:83885-84144	260	4:51416884-51417137	NC_000007.14:27248779-27249034	mUCE.1054
NW_004500167.1:79586-79792	207	4:51505366-51505570	NC_000007.14:27362637-27362840	mUCE.1055
NW_004458780.1:86707-86920	214	4:51644148-51644358	NC_000007.14:27531920-27532132	mUCE.1056
NW_004458780.1:171897-172241	345	4:51707639-51707982	NC_000007.14:27606188-27606531	mUCE.1057
NW_004458780.1:568267-568584	318	4:52009957-52010273	NC_000007.14:27941293-27941609	mUCE.1058
NW_004458780.1:693932-694134	203	4:52136117-52136313	NC_000007.14:28076237-28076438	mUCE.1059
NW_004481093.1:2793175-2793442	268	4:38407442-38407707	NC_000007.14:39084042-39084310	mUCE.1060
NW_004481093.1:2677386-2677598	213	4:38511921-38512132	NC_000007.14:39184885-39185096	mUCE.1061
NW_004481093.1:2635962-2636270	309	4:38560020-38560327	NC_000007.14:39226036-39226343	mUCE.1062
NW_004481093.1:2564391-2564630	240	4:38628131-38628368	NC_000007.14:39291706-39291944	mUCE.1063
NW_004481093.1:2409001-2409272	272	4:38799657-38799925	NC_000007.14:39464146-39464415	mUCE.1064
NW_004481093.1:1917183-1917395	213	4:39216368-39216581	NC_000007.14:40095365-40095578	mUCE.1065
NW_004501872.1:131937-132137	201	4:41181372-41181571	NC_000007.14:42020283-42020473	mUCE.1066
NW_004501872.1:179564-179808	245	4:41234056-41234299	NC_000007.14:42062793-42063036	mUCE.1067
NW_004480569.1:987412-987801	390	4:114927559-114927944	NC_000007.14:50318541-50318925	mUCE.1068
NW_004483405.1:3701264-3701534	271	7:22108110-22108379	NC_000007.14:67335776-67336043	mUCE.1069
NW_004481484.1:762532-762855	324	25:31990278-31990594	NC_000007.14:67916842-67917164	mUCE.1070
NW_004460506.1:82344-82581	238	25:30253355-30253591	NC_000007.14:70153926-70154162	mUCE.1071
NW_004460506.1:152833-153564	732	25:30166860-30167592	NC_000007.14:70237462-70238192	mUCE.1072
NW_004460506.1:221815-222126	312	25:30109311-30109621	NC_000007.14:70294253-70294563	mUCE.1073
NW_004460754.1:27378-27636	259	25:30069351-30069608	NC_000007.14:70338001-70338258	mUCE.1074
NW_004480548.1:1244810-1245026	217	25:29915320-29915535	NC_000007.14:70484055-70484270	mUCE.1075
NW_004480548.1:1292484-1292741	258	25:29866700-29866956	NC_000007.14:70530232-70530486	mUCE.1076
NW_004480549.1:69893-70142	250	25:29760841-29761089	NC_000007.14:70645759-70646007	mUCE.1077
NW_004480549.1:70213-70421	209	25:29760563-29760768	NC_000007.14:70646076-70646283	mUCE.1078
NW_004480549.1:96089-96390	302	25:29739188-29739482	NC_000007.14:70667022-70667319	mUCE.1079
NW_004485904.1:9138381-9138646	266	4:77075528-77075792	NC_000007.14:78065540-78065804	mUCE.1080
NW_004485904.1:5044192-5044392	201	4:81377532-81377730	NC_000007.14:81752114-81752309	mUCE.1081
NW_004492963.1:170045-170365	321	4:47919730-47920046	NC_000007.14:88178859-88179178	mUCE.1082
NW_004489645.1:1248929-1249156	228	4:110232403-110232629	NC_000007.14:93015505-93015732	mUCE.1083
NW_004483421.1:2297750-2297954	205	4:107191710-107191910	NC_000007.14:96118210-96118413	mUCE.1084
NW_004483421.1:3067040-3067284	245	4:106406587-106406830	NC_000007.14:96895267-96895510	mUCE.1085
NW_004483421.1:3185115-3185506	392	4:106275182-106275574	NC_000007.14:97013993-97014388	mUCE.1086
NW_004474585.1:209298-209511	214	14:20572981-20573191	NC_000008.11:102843544-102843752	mUCE.1087
NW_004478042.1:6452377-6452912	536	14:22418270-22418800	NC_000008.11:104869075-104869605	mUCE.1088
NW_004478042.1:6128813-6129177	365	14:22674582-22674940	NC_000008.11:105143407-105143769	mUCE.1089
NW_004478042.1:5945874-5946093	220	14:22861866-22862084	NC_000008.11:105354174-105354392	mUCE.1090
NW_004478042.1:5864338-5864612	275	14:22946654-22946927	NC_000008.11:105434459-105434732	mUCE.1091
NW_004478042.1:5706621-5706976	356	14:23130460-23130812	NC_000008.11:105592668-105593020	mUCE.1092
NW_004478042.1:5575835-5576107	273	14:23272417-23272688	NC_000008.11:105730881-105731149	mUCE.1093
NW_004478042.1:5562917-5563178	262	14:23289006-23289266	NC_000008.11:105747426-105747686	mUCE.1094
NW_004478042.1:3115960-3116175	216	14:25782557-25782766	NC_000008.11:108079495-108079710	mUCE.1095
NW_004459462.1:150737-150939	203	8:8344335-8344536	NC_000008.11:10808979-10809180	mUCE.1096
NW_004483507.1:188884-189084	201	14:33161624-33161823	NC_000008.11:115419673-115419872	mUCE.1097
NW_004483507.1:221315-221529	215	14:33197282-33197492	NC_000008.11:115451733-115451943	mUCE.1098
NW_004483507.1:221633-221886	254	14:33197603-33197855	NC_000008.11:115452049-115452301	mUCE.1099
NW_004483507.1:386641-386863	223	14:33373514-33373735	NC_000008.11:115619177-115619398	mUCE.1100
NW_004483507.1:425187-425461	275	14:33424566-33424830	NC_000008.11:115663242-115663516	mUCE.1101
NW_004483507.1:1310803-1311020	218	14:34237535-34237746	NC_000008.11:116478994-116479210	mUCE.1102
NW_004500011.1:453571-453903	333	14:35919767-35920098	NC_000008.11:118110965-118111296	mUCE.1103
NW_004469607.1:552112-552317	206	14:67096043-67096244	NC_000008.11:125273300-125273504	mUCE.1104
NW_004482583.1:170620-170874	255	8:68704737-68704982	NC_000008.11:21719478-21719730	mUCE.1105
NW_004480463.1:100745-101032	288	8:68984019-68984303	NC_000008.11:21988608-21988892	mUCE.1106
NW_004480540.1:5283879-5284152	274	8:69849154-69849421	NC_000008.11:22889562-22889854	mUCE.1107
NW_004480383.1:501634-501846	213	8:70803080-70803278	NC_000008.11:23852204-23852415	mUCE.1108
NW_004482236.1:1720110-1720432	323	8:73006303-73006623	NC_000008.11:25918446-25918767	mUCE.1109
NW_004482236.1:1703542-1703751	210	8:73026601-73026805	NC_000008.11:25935274-25935476	mUCE.1110
NW_004482236.1:1700688-1700991	304	8:73029382-73029680	NC_000008.11:25938064-25938361	mUCE.1111
NW_004482236.1:1676109-1676355	247	8:73058989-73059234	NC_000008.11:25963688-25963933	mUCE.1112
NW_004482236.1:1625853-1626274	422	8:73113306-73113724	NC_000008.11:26014682-26015102	mUCE.1113
NW_004490343.1:175443-175660	218	8:9572898-9573114	NC_000008.11:28979982-28980200	mUCE.1114
NW_004490343.1:38106-38349	244	8:9464657-9464893	NC_000008.11:29063555-29063797	mUCE.1115
NW_004488819.1:451974-452178	205	27:19005262-19005465	NC_000008.11:30504244-30504446	mUCE.1116
NW_004483087.1:1383817-1384042	226	27:13341771-13341992	NC_000008.11:37020357-37020576	mUCE.1117
NW_004483087.1:1256761-1257030	270	27:13225704-13225965	NC_000008.11:37156835-37157103	mUCE.1118
NW_004483087.1:1082131-1082384	254	27:13069671-13069920	NC_000008.11:37329753-37330005	mUCE.1119
NW_004483087.1:1070523-1070763	241	27:13060538-13060776	NC_000008.11:37342009-37342241	mUCE.1120
NW_004483087.1:1056136-1056496	361	27:13047123-13047476	NC_000008.11:37360551-37360904	mUCE.1121
NW_004483087.1:1000427-1000710	284	27:12984378-12984657	NC_000008.11:37420470-37420752	mUCE.1122
NW_004483087.1:714060-714269	210	27:12691592-12691798	NC_000008.11:37703440-37703648	mUCE.1123
NW_004482882.1:1388165-1388371	207	27:9318620-9318818	NC_000008.11:41342647-41342850	mUCE.1124
NW_004496233.1:379985-380217	233	14:60821009-60821240	NC_000008.11:52215223-52215452	mUCE.1125
NW_004496233.1:390488-390901	414	14:60808805-60809217	NC_000008.11:52225434-52225846	mUCE.1126
NW_004496233.1:407638-407940	303	14:60791251-60791551	NC_000008.11:52244630-52244929	mUCE.1127
NW_004503444.1:3161718-3161951	234	14:57025145-57025377	NC_000008.11:58901126-58901358	mUCE.1128
NW_004503444.1:3063281-3063512	232	14:56927031-56927259	NC_000008.11:59003943-59004173	mUCE.1129
NW_004503444.1:3053131-3053356	226	14:56916532-56916756	NC_000008.11:59014916-59015140	mUCE.1130
NW_004503444.1:3029022-3029297	276	14:56903358-56903632	NC_000008.11:59029783-59030057	mUCE.1131
NW_004503444.1:2405926-2406255	330	14:56506785-56507112	NC_000008.11:59630863-59631191	mUCE.1132
NW_004503444.1:1461119-1461417	299	14:55870457-55870754	NC_000008.11:60583598-60583895	mUCE.1133
NW_004503444.1:1171371-1171600	230	14:55626695-55626920	NC_000008.11:60847979-60848204	mUCE.1134
NW_004481531.1:1697010-1697290	281	14:53544982-53545257	NC_000008.11:63704102-63704381	mUCE.1135
NW_004481531.1:2191572-2191772	201	14:53123653-53123850	NC_000008.11:64225970-64226166	mUCE.1136
NW_004481531.1:2225126-2225553	428	14:53078256-53078683	NC_000008.11:64266777-64267200	mUCE.1137
NW_004481531.1:2442856-2443087	232	14:52890891-52891117	NC_000008.11:64483048-64483272	mUCE.1138
NW_004481531.1:2524407-2524614	208	14:52827372-52827578	NC_000008.11:64579996-64580202	mUCE.1139
NW_004481531.1:2561893-2562192	300	14:52799287-52799586	NC_000008.11:64607415-64607713	mUCE.1140
NW_004481531.1:2640620-2640868	249	14:52719305-52719552	NC_000008.11:64700945-64701192	mUCE.1141
NW_004500879.1:343816-344162	347	14:52402068-52402412	NC_000008.11:65189611-65189956	mUCE.1142
NW_004500879.1:399453-400032	580	14:52362151-52362729	NC_000008.11:65237005-65237583	mUCE.1143
NW_004500879.1:651797-652017	221	14:52211224-52211443	NC_000008.11:65455211-65455430	mUCE.1144
NW_004464027.1:2602680-2603042	363	14:48287931-48288294	NC_000008.11:70109775-70110136	mUCE.1145
NW_004464027.1:3646013-3646235	223	14:47401596-47401817	NC_000008.11:71165547-71165768	mUCE.1146
NW_004464027.1:3837318-3837567	250	14:47174072-47174320	NC_000008.11:71359185-71359433	mUCE.1147
NW_004476421.1:180890-181125	236	14:42912302-42912536	NC_000008.11:75974231-75974459	mUCE.1148
NW_004476421.1:102196-102493	298	14:42811436-42811728	NC_000008.11:76048204-76048501	mUCE.1149
NW_004492530.1:125805-126085	281	14:42647821-42648100	NC_000008.11:76228908-76229187	mUCE.1150
NW_004492530.1:271864-272143	280	14:42483383-42483659	NC_000008.11:76403895-76404170	mUCE.1151
NW_004492530.1:346567-346833	267	14:42428941-42429206	NC_000008.11:76460621-76460886	mUCE.1152
NW_004492530.1:517866-518100	235	14:42249276-42249510	NC_000008.11:76681181-76681414	mUCE.1153
NW_004492530.1:520420-520770	351	14:42246673-42247007	NC_000008.11:76683690-76684037	mUCE.1154
NW_004492530.1:521591-521859	269	14:42245592-42245859	NC_000008.11:76684845-76685112	mUCE.1155
NW_004492530.1:521861-522152	292	14:42245301-42245589	NC_000008.11:76685115-76685405	mUCE.1156
NW_004492530.1:533696-533913	218	14:42233991-42234207	NC_000008.11:76696278-76696494	mUCE.1157
NW_004492530.1:536405-536685	281	14:42231343-42231622	NC_000008.11:76698874-76699153	mUCE.1158
NW_004492530.1:537366-537623	258	14:42230393-42230647	NC_000008.11:76699840-76700096	mUCE.1159
NW_004492530.1:545913-546148	236	14:42222514-42222748	NC_000008.11:76707651-76707885	mUCE.1160
NW_004492530.1:575841-576067	227	14:42188173-42188398	NC_000008.11:76735913-76736138	mUCE.1161
NW_004492530.1:612085-612287	203	14:42141327-42141526	NC_000008.11:76775592-76775792	mUCE.1162
NW_004492530.1:637813-638060	248	14:42112983-42113229	NC_000008.11:76802154-76802400	mUCE.1163
NW_004492530.1:644059-644413	355	14:42106537-42106886	NC_000008.11:76808487-76808838	mUCE.1164
NW_004492530.1:1138317-1138720	404	14:41636129-41636531	NC_000008.11:77260968-77261370	mUCE.1165
NW_004492530.1:1455692-1455912	221	14:41252706-41252925	NC_000008.11:77610268-77610487	mUCE.1166
NW_004492530.1:2128136-2128348	213	14:40578451-40578662	NC_000008.11:78252313-78252524	mUCE.1167
NW_004494979.1:8515-8787	273	14:39252991-39253262	NC_000008.11:79610874-79611145	mUCE.1168
NW_004488161.1:6018468-6018721	254	14:9815882-9816132	NC_000008.11:91971873-91972124	mUCE.1169
NW_004488161.1:5921862-5922162	301	14:9914356-9914651	NC_000008.11:92066271-92066570	mUCE.1170
NW_004488161.1:5841157-5841362	206	14:9987151-9987352	NC_000008.11:92139137-92139339	mUCE.1171
NW_004488161.1:5697359-5697572	214	14:10114326-10114539	NC_000008.11:92273059-92273265	mUCE.1172
NW_004488161.1:5564465-5564747	283	14:10297573-10297854	NC_000008.11:92467114-92467395	mUCE.1173
NW_004488161.1:5522570-5522964	395	14:10343823-10344215	NC_000008.11:92505144-92505536	mUCE.1174
NW_004488161.1:5521643-5521862	220	14:10344906-10345116	NC_000008.11:92506236-92506451	mUCE.1175
NW_004488161.1:5398399-5398758	360	14:10459468-10459827	NC_000008.11:92611231-92611589	mUCE.1176
NW_004488161.1:4943007-4943274	268	14:10933746-10934004	NC_000008.11:93026486-93026752	mUCE.1177
NW_004488161.1:4931632-4931972	341	14:10955991-10956330	NC_000008.11:93040911-93041250	mUCE.1178
NW_004488161.1:4662842-4663083	242	14:11247186-11247426	NC_000008.11:93307798-93308038	mUCE.1179
NW_004488161.1:4523680-4523935	256	14:11380778-11381032	NC_000008.11:93444974-93445228	mUCE.1180
NW_004488161.1:3236448-3236686	239	14:12568699-12568936	NC_000008.11:94674374-94674611	mUCE.1181
NW_004461054.1:330262-330485	224	8:64825623-64825844	NC_000009.12:100205302-100205522	mUCE.1182
NW_004461054.1:127817-128078	262	8:64957591-64957851	NC_000009.12:100347148-100347408	mUCE.1183
NW_004481021.1:1555261-1555593	333	8:95436008-95436337	NC_000009.12:105911050-105911378	mUCE.1184
NW_004481021.1:2226686-2226890	205	8:96142512-96142715	NC_000009.12:106637889-106638092	mUCE.1185
NW_004481021.1:2436372-2436590	219	8:96399472-96399685	NC_000009.12:106863092-106863307	mUCE.1186
NW_004483315.1:558637-559028	392	8:102658193-102658583	NC_000009.12:113742139-113742529	mUCE.1187
NW_004483315.1:795893-796145	253	8:102908600-102908850	NC_000009.12:113964297-113964548	mUCE.1188
NW_004483315.1:796349-796569	221	8:102909056-102909275	NC_000009.12:113964770-113964987	mUCE.1189
NW_004483315.1:796571-796936	366	8:102909282-102909643	NC_000009.12:113964999-113965350	mUCE.1190
NW_004482065.1:192325-192540	216	8:109292815-109293030	NC_000009.12:120097856-120098070	mUCE.1191
NW_004485858.1:635019-635248	230	8:109893431-109893659	NC_000009.12:120788069-120788297	mUCE.1192
NW_004471847.1:195518-195837	320	11:92798012-92798330	NC_000009.12:122337070-122337388	mUCE.1193
NW_004481341.1:2810540-2810746	207	11:94196315-94196516	NC_000009.12:123568858-123569063	mUCE.1194
NW_004481341.1:2564080-2564350	271	11:94408663-94408932	NC_000009.12:123776751-123777020	mUCE.1195
NW_004481341.1:2548158-2548538	381	11:94422565-94422945	NC_000009.12:123789511-123789890	mUCE.1196
NW_004481341.1:2545213-2545600	388	11:94425561-94425945	NC_000009.12:123792487-123792871	mUCE.1197
NW_004481341.1:2315414-2315680	267	11:94628931-94629192	NC_000009.12:124001305-124001570	mUCE.1198
NW_004481341.1:1721905-1722172	268	11:95136384-95136654	NC_000009.12:124593808-124594073	mUCE.1199
NW_004481341.1:1001928-1002148	221	11:95693263-95693480	NC_000009.12:125342176-125342395	mUCE.1200
NW_004481341.1:936121-936411	291	11:95752782-95753071	NC_000009.12:125397464-125397750	mUCE.1201
NW_004481341.1:883470-883689	220	11:95805054-95805272	NC_000009.12:125461315-125461530	mUCE.1202
NW_004481341.1:873893-874115	223	11:95814274-95814493	NC_000009.12:125470318-125470537	mUCE.1203
NW_004481341.1:832842-833048	207	11:95836459-95836659	NC_000009.12:125495442-125495648	mUCE.1204
NW_004481341.1:812788-813062	275	11:95851386-95851659	NC_000009.12:125515274-125515547	mUCE.1205
NW_004481341.1:777058-777362	305	11:95879410-95879713	NC_000009.12:125545851-125546154	mUCE.1206
NW_004481341.1:772622-772950	329	11:95883339-95883665	NC_000009.12:125549623-125549948	mUCE.1207
NW_004481341.1:667712-668104	393	11:95950515-95950906	NC_000009.12:125633800-125634191	mUCE.1208
NW_004481341.1:660089-660425	337	11:95963496-95963831	NC_000009.12:125644472-125644807	mUCE.1209
NW_004481341.1:625148-625510	363	11:95991463-95991822	NC_000009.12:125670142-125670501	mUCE.1210
NW_004481341.1:597849-598059	211	11:96012720-96012925	NC_000009.12:125695293-125695498	mUCE.1211
NW_004481341.1:534882-535148	267	11:96065755-96066009	NC_000009.12:125755429-125755694	mUCE.1212
NW_004481341.1:527747-528050	304	11:96072756-96073058	NC_000009.12:125762524-125762826	mUCE.1213
NW_004481341.1:526008-526308	301	11:96074489-96074788	NC_000009.12:125764251-125764550	mUCE.1214
NW_004481341.1:475975-476235	261	11:96152294-96152553	NC_000009.12:125821823-125822081	mUCE.1215
NW_004481341.1:385198-385570	373	11:96240234-96240605	NC_000009.12:125904592-125904963	mUCE.1216
NW_004481341.1:379239-379526	288	11:96246118-96246404	NC_000009.12:125910280-125910563	mUCE.1217
NW_004481341.1:373838-374116	279	11:96251308-96251585	NC_000009.12:125915659-125915936	mUCE.1218
NW_004481341.1:198006-198238	233	11:96395516-96395740	NC_000009.12:126065082-126065311	mUCE.1219
NW_004481341.1:144028-144621	594	11:96435725-96436317	NC_000009.12:126107627-126108219	mUCE.1220
NW_004482424.1:168815-169188	374	11:96711806-96712174	NC_000009.12:126383322-126383688	mUCE.1221
NW_004482424.1:193691-193991	301	11:96738256-96738555	NC_000009.12:126408110-126408409	mUCE.1222
NW_004482424.1:251658-251967	310	11:96795293-96795604	NC_000009.12:126461884-126462189	mUCE.1223
NW_004482424.1:367539-367768	230	11:96901705-96901932	NC_000009.12:126582977-126583205	mUCE.1224
NW_004482424.1:536032-536260	229	11:97070391-97070618	NC_000009.12:126755145-126755372	mUCE.1225
NW_004469776.1:47093-47363	271	11:98518822-98519088	NC_000009.12:128393296-128393559	mUCE.1226
NW_004481582.1:258778-259040	263	8:31122761-31123023	NC_000009.12:13064059-13064307	mUCE.1227
NW_004482782.1:149460-149676	217	11:100880069-100880280	NC_000009.12:131228125-131228341	mUCE.1228
NW_004462011.1:251004-251230	227	8:30590376-30590601	NC_000009.12:13570030-13570253	mUCE.1229
NW_004480605.1:304119-304401	283	8:29997213-29997485	NC_000009.12:14081818-14082091	mUCE.1230
NW_004480605.1:308780-309177	398	8:29992455-29992850	NC_000009.12:14086370-14086766	mUCE.1231
NW_004480605.1:310196-310512	317	8:29991091-29991404	NC_000009.12:14087787-14088101	mUCE.1232
NW_004483985.1:657208-657520	313	8:29779914-29780222	NC_000009.12:14271233-14271544	mUCE.1233
NW_004483985.1:679537-679850	314	8:29756680-29756992	NC_000009.12:14293001-14293313	mUCE.1234
NW_004483985.1:693765-694092	328	8:29743278-29743604	NC_000009.12:14306984-14307310	mUCE.1235
NW_004483985.1:828020-828260	241	8:29611556-29611795	NC_000009.12:14433516-14433755	mUCE.1236
NW_004481656.1:853622-853894	273	8:29313556-29313827	NC_000009.12:14750098-14750369	mUCE.1237
NW_004482011.1:239772-240106	335	8:28451958-28452289	NC_000009.12:15843853-15844184	mUCE.1238
NW_004482011.1:262419-262696	278	8:28414846-28415122	NC_000009.12:15872553-15872829	mUCE.1239
NW_004482011.1:420970-421387	418	8:28316431-28316847	NC_000009.12:15972688-15973104	mUCE.1240
NW_004482011.1:763614-763868	255	8:28007004-28007257	NC_000009.12:16278426-16278679	mUCE.1241
NW_004482011.1:793459-793662	204	8:27976642-27976842	NC_000009.12:16309911-16310110	mUCE.1242
NW_004482011.1:1004786-1005135	350	8:27719396-27719747	NC_000009.12:16522139-16522486	mUCE.1243
NW_004482011.1:1050101-1050343	243	8:27672062-27672301	NC_000009.12:16571513-16571754	mUCE.1244
NW_004482011.1:1189097-1189323	227	8:27525102-27525327	NC_000009.12:16708814-16709039	mUCE.1245
NW_004482011.1:1358098-1358336	239	8:27349573-27349809	NC_000009.12:16868127-16868364	mUCE.1246
NW_004482011.1:1476480-1476702	223	8:27242017-27242238	NC_000009.12:17005772-17005993	mUCE.1247
NW_004482011.1:2019006-2019254	249	8:26784783-26785030	NC_000009.12:17487413-17487660	mUCE.1248
NW_004477785.1:5141523-5141807	285	8:42251575-42251852	NC_000009.12:2160424-2160700	mUCE.1249
NW_004462285.1:185363-185578	216	8:20965333-20965548	NC_000009.12:23496741-23496955	mUCE.1250
NW_004480948.1:572679-572995	317	8:20503289-20503602	NC_000009.12:23690074-23690389	mUCE.1251
NW_004480948.1:416171-416378	208	8:20341049-20341255	NC_000009.12:23842883-23843089	mUCE.1252
NW_004480948.1:203088-203293	206	8:20184309-20184513	NC_000009.12:24036701-24036905	mUCE.1253
NW_004481414.1:1205019-1205286	268	8:19577809-19578074	NC_000009.12:24608684-24608950	mUCE.1254
NW_004477785.1:3954086-3954368	283	8:41094392-41094672	NC_000009.12:3270322-3270600	mUCE.1255
NW_004477785.1:3915500-3915723	224	8:41060197-41060419	NC_000009.12:3301462-3301684	mUCE.1256
NW_004477696.1:2354971-2355182	212	8:60276773-60276982	NC_000009.12:36339086-36339296	mUCE.1257
NW_004477696.1:2354475-2354846	372	8:60277110-60277480	NC_000009.12:36339412-36339783	mUCE.1258
NW_004477696.1:1936146-1936353	208	8:60539639-60539845	NC_000009.12:36677761-36677959	mUCE.1259
NW_004477696.1:1889189-1889449	261	8:60560365-60560624	NC_000009.12:36714028-36714284	mUCE.1260
NW_004477696.1:1867780-1867989	210	8:60587938-60588143	NC_000009.12:36738954-36739162	mUCE.1261
NW_004477696.1:1777459-1777765	307	8:60665881-60666187	NC_000009.12:36819100-36819405	mUCE.1262
NW_004477696.1:1660259-1660459	201	8:60738445-60738644	NC_000009.12:36902176-36902367	mUCE.1263
NW_004477696.1:1602839-1603105	267	8:60792653-60792918	NC_000009.12:36961412-36961676	mUCE.1264
NW_004477696.1:1363975-1364297	323	8:60996460-60996781	NC_000009.12:37215033-37215354	mUCE.1265
NW_004477696.1:1324448-1324860	413	8:61027519-61027930	NC_000009.12:37251449-37251860	mUCE.1266
NW_004477696.1:1248958-1249453	496	8:61105525-61106015	NC_000009.12:37324172-37324663	mUCE.1267
NW_004477696.1:1248499-1248949	451	8:61106028-61106479	NC_000009.12:37324676-37325125	mUCE.1268
NW_004477696.1:1235207-1235427	221	8:61119019-61119238	NC_000009.12:37337411-37337630	mUCE.1269
NW_004477785.1:3092111-3092359	249	8:40213698-40213945	NC_000009.12:4125729-4125976	mUCE.1270
NW_004477785.1:1088871-1089106	236	8:38621900-38622132	NC_000009.12:5919016-5919250	mUCE.1271
NW_004477785.1:1065083-1065334	252	8:38589920-38590169	NC_000009.12:5944809-5945058	mUCE.1272
NW_004481843.1:1059008-1059229	222	8:48393230-48393450	NC_000009.12:72354430-72354640	mUCE.1273
NW_004491627.1:4220727-4220954	228	8:54133670-54133896	NC_000009.12:78397610-78397836	mUCE.1274
NW_004491627.1:3964521-3964804	284	8:54351652-54351934	NC_000009.12:78631555-78631837	mUCE.1275
NW_004491627.1:3910648-3910892	245	8:54411167-54411409	NC_000009.12:78678906-78679149	mUCE.1276
NW_004491627.1:3712000-3712255	256	8:54591764-54592018	NC_000009.12:78857475-78857729	mUCE.1277
NW_004491627.1:3048352-3048626	275	8:55295103-55295376	NC_000009.12:79504809-79505082	mUCE.1278
NW_004491627.1:2979768-2979972	205	8:55382435-55382637	NC_000009.12:79578629-79578832	mUCE.1279
NW_004491627.1:2978282-2978586	305	8:55383946-55384249	NC_000009.12:79579979-79580282	mUCE.1280
NW_004491627.1:2932945-2933337	393	8:55435974-55436365	NC_000009.12:79631084-79631475	mUCE.1281
NW_004491627.1:1235482-1235804	323	8:56866080-56866402	NC_000009.12:81112404-81112725	mUCE.1282
NW_004491627.1:969715-969925	211	8:57113472-57113678	NC_000009.12:81377375-81377583	mUCE.1283
NW_004491627.1:947237-947477	241	8:57129149-57129387	NC_000009.12:81394922-81395160	mUCE.1284
NW_004491627.1:779963-780184	222	8:57263574-57263794	NC_000009.12:81535628-81535848	mUCE.1285
NW_004491627.1:671805-672179	375	8:57358792-57359174	NC_000009.12:81633480-81633853	mUCE.1286
NW_004491627.1:502946-503162	217	8:57482593-57482807	NC_000009.12:81789672-81789887	mUCE.1287
NW_004463609.1:2548918-2549202	285	8:58443033-58443316	NC_000009.12:82668734-82669015	mUCE.1288
NW_004463609.1:2476900-2477115	216	8:58560621-58560835	NC_000009.12:82761434-82761648	mUCE.1289
NW_004463609.1:1193981-1194292	312	8:77016264-77016572	NC_000009.12:83973480-83973790	mUCE.1290
NW_004463609.1:1191857-1192538	682	8:77017967-77018646	NC_000009.12:83975200-83975873	mUCE.1291
NW_004491384.1:670120-670332	213	8:36304578-36304788	NC_000009.12:8438667-8438877	mUCE.1292
NW_004491384.1:587520-587743	224	8:36211798-36212020	NC_000009.12:8523408-8523630	mUCE.1293
NW_004491384.1:583440-583655	216	8:36207713-36207928	NC_000009.12:8527450-8527664	mUCE.1294
NW_004483450.1:529434-529674	241	8:79825663-79825902	NC_000009.12:86902956-86903195	mUCE.1295
NW_004483450.1:567088-567399	312	8:79868091-79868401	NC_000009.12:86940853-86941163	mUCE.1296
NW_004498706.1:169124-169331	208	8:89401861-89402063	NC_000009.12:88478544-88478743	mUCE.1297
NW_004483450.1:2632822-2633036	215	8:81922472-81922685	NC_000009.12:95509137-95509355	mUCE.1298
NW_004480363.1:306020-306294	275	8:43433890-43434163	NC_000009.12:966879-967152	mUCE.1299
NW_004480341.1:334948-335149	202	26:30265509-30265708	NC_000010.11:100524367-100524565	mUCE.1300
NW_004480341.1:220033-220348	316	26:30190615-30190929	NC_000010.11:100612845-100613159	mUCE.1301
NW_004480341.1:217702-218000	299	26:30188343-30188635	NC_000010.11:100615286-100615583	mUCE.1302
NW_004480341.1:204646-204928	283	26:30175683-30175964	NC_000010.11:100628179-100628460	mUCE.1303
NW_004480341.1:178932-179312	381	26:30149148-30149527	NC_000010.11:100659447-100659826	mUCE.1304
NW_004480341.1:112480-112695	216	26:30084119-30084333	NC_000010.11:100736769-100736982	mUCE.1305
NW_004480341.1:97116-97369	254	26:30068899-30069151	NC_000010.11:100752019-100752271	mUCE.1306
NW_004480341.1:81649-81930	282	26:30054265-30054545	NC_000010.11:100767559-100767839	mUCE.1307
NW_004480341.1:64216-64663	448	26:30035665-30036111	NC_000010.11:100787275-100787718	mUCE.1308
NW_004480341.1:63657-63937	281	26:30035105-30035384	NC_000010.11:100787983-100788258	mUCE.1309
NW_004480341.1:59574-59853	280	26:30030837-30031112	NC_000010.11:100792748-100793026	mUCE.1310
NW_004480341.1:46762-47167	406	26:30019712-30020116	NC_000010.11:100803895-100804296	mUCE.1311
NW_004480341.1:43247-43657	411	26:30016113-30016522	NC_000010.11:100807866-100808275	mUCE.1312
NW_004480341.1:40368-40634	267	26:30013267-30013532	NC_000010.11:100810861-100811126	mUCE.1313
NW_004480341.1:24113-24327	215	26:29997804-29998017	NC_000010.11:100827483-100827694	mUCE.1314
NW_004479695.1:16205-16432	228	26:29963018-29963241	NC_000010.11:100859109-100859332	mUCE.1315
NW_004479695.1:20599-20815	217	26:29958580-29958795	NC_000010.11:100864618-100864832	mUCE.1316
NW_004479695.1:25751-25961	211	26:29953290-29953499	NC_000010.11:100870331-100870540	mUCE.1317
NW_004480433.1:678968-679175	208	26:29718754-29718962	NC_000010.11:101134085-101134291	mUCE.1318
NW_004480433.1:606108-606426	319	26:29659329-29659646	NC_000010.11:101219415-101219724	mUCE.1319
NW_004480433.1:584268-584514	247	26:29637179-29637422	NC_000010.11:101242303-101242544	mUCE.1320
NW_004480433.1:567438-567710	273	26:29620984-29621258	NC_000010.11:101262516-101262786	mUCE.1321
NW_004480433.1:535424-535746	323	26:29597275-29597595	NC_000010.11:101292670-101292990	mUCE.1322
NW_004480433.1:510058-510458	401	26:29572715-29573110	NC_000010.11:101322662-101323061	mUCE.1323
NW_004480433.1:505236-505555	320	26:29566803-29567116	NC_000010.11:101330893-101331207	mUCE.1324
NW_004480433.1:373162-373476	315	26:29467244-29467555	NC_000010.11:101438996-101439309	mUCE.1325
NW_004480433.1:366916-367198	283	26:29461580-29461860	NC_000010.11:101444513-101444790	mUCE.1326
NW_004480433.1:365592-365940	349	26:29460247-29460590	NC_000010.11:101445758-101446101	mUCE.1327
NW_004480433.1:317757-318177	421	26:29418962-29419381	NC_000010.11:101484187-101484606	mUCE.1328
NW_004480433.1:297133-297525	393	26:29402205-29402615	NC_000010.11:101507195-101507586	mUCE.1329
NW_004480433.1:35958-36366	409	26:29208106-29208513	NC_000010.11:101708133-101708541	mUCE.1330
NW_004458668.1:349421-349669	249	26:29136370-29136612	NC_000010.11:101795355-101795599	mUCE.1331
NW_004494704.1:754048-754361	314	26:28771699-28772011	NC_000010.11:102264546-102264858	mUCE.1332
NW_004482916.1:491616-491838	223	13:14852896-14853117	NC_000010.11:10709062-10709281	mUCE.1333
NW_004479015.1:1156210-1156445	236	26:18979316-18979543	NC_000010.11:112490615-112490848	mUCE.1334
NW_004479015.1:1100461-1100669	209	26:18938773-18938980	NC_000010.11:112533279-112533486	mUCE.1335
NW_004479015.1:997577-997922	346	26:18826394-18826736	NC_000010.11:112644471-112644811	mUCE.1336
NW_004479015.1:854877-855111	235	26:18677481-18677709	NC_000010.11:112791485-112791718	mUCE.1337
NW_004479015.1:820213-820484	272	26:18639987-18640257	NC_000010.11:112831625-112831895	mUCE.1338
NW_004479015.1:764740-764969	230	26:18588038-18588265	NC_000010.11:112887280-112887508	mUCE.1339
NW_004479015.1:707626-707845	220	26:18524388-18524605	NC_000010.11:112958353-112958571	mUCE.1340
NW_004479015.1:692370-692598	229	26:18509112-18509337	NC_000010.11:112977513-112977740	mUCE.1341
NW_004479015.1:685330-685584	255	26:18501739-18501992	NC_000010.11:112986330-112986583	mUCE.1342
NW_004479015.1:569757-570011	255	26:18380264-18380516	NC_000010.11:113119909-113120160	mUCE.1343
NW_004479015.1:565481-565710	230	26:18376059-18376287	NC_000010.11:113124227-113124450	mUCE.1344
NW_004479015.1:545006-545353	348	26:18354861-18355207	NC_000010.11:113145502-113145848	mUCE.1345
NW_004479015.1:457209-457651	443	26:18277252-18277693	NC_000010.11:113244371-113244811	mUCE.1346
NW_004482916.1:1115735-1116052	318	13:15486772-15487086	NC_000010.11:11333816-11334148	mUCE.1347
NW_004480412.1:425901-426112	212	26:17381454-17381663	NC_000010.11:114132005-114132214	mUCE.1348
NW_004483515.1:1856737-1856942	206	26:14541062-14541266	NC_000010.11:117096584-117096788	mUCE.1349
NW_004483515.1:1408206-1408466	261	26:14149323-14149582	NC_000010.11:117542579-117542838	mUCE.1350
NW_004483515.1:1399209-1399513	305	26:14140555-14140855	NC_000010.11:117551453-117551753	mUCE.1351
NW_004483515.1:1395501-1395707	207	26:14137281-14137486	NC_000010.11:117554664-117554870	mUCE.1352
NW_004483515.1:1194172-1194418	247	26:13984781-13985026	NC_000010.11:117732857-117733102	mUCE.1353
NW_004483515.1:1186654-1186859	206	26:13974213-13974417	NC_000010.11:117743500-117743704	mUCE.1354
NW_004483515.1:1088674-1088907	234	26:13873982-13874214	NC_000010.11:117830915-117831143	mUCE.1355
NW_004483515.1:1041241-1041464	224	26:13832456-13832673	NC_000010.11:117885042-117885264	mUCE.1356
NW_004483515.1:858587-858857	271	26:13681688-13681954	NC_000010.11:118030369-118030638	mUCE.1357
NW_004483515.1:777687-777915	229	26:13592902-13593129	NC_000010.11:118108886-118109112	mUCE.1358
NW_004483515.1:692597-692831	235	26:13509653-13509885	NC_000010.11:118208376-118208609	mUCE.1359
NW_004483515.1:631775-632017	243	26:13447482-13447723	NC_000010.11:118258454-118258694	mUCE.1360
NW_004487889.1:244624-245088	465	26:9137510-9137973	NC_000010.11:123092922-123093385	mUCE.1361
NW_004487889.1:93971-94217	247	26:8999096-8999340	NC_000010.11:123253378-123253623	mUCE.1362
NW_004487889.1:47180-47434	255	26:8951123-8951375	NC_000010.11:123305841-123306094	mUCE.1363
NW_004487889.1:5053-5405	353	26:8906051-8906402	NC_000010.11:123349183-123349534	mUCE.1364
NW_004458461.1:22467-22803	337	26:8872280-8872615	NC_000010.11:123374534-123374869	mUCE.1365
NW_004458461.1:100803-101003	201	26:8797779-8797978	NC_000010.11:123457814-123458013	mUCE.1366
NW_004458461.1:1806024-1806233	210	26:7295256-7295464	NC_000010.11:125195238-125195444	mUCE.1367
NW_004465780.1:261221-261424	204	26:4478496-4478698	NC_000010.11:128166139-128166341	mUCE.1368
NW_004465780.1:356798-356998	201	26:4388851-4389050	NC_000010.11:128265243-128265442	mUCE.1369
NW_004465780.1:376879-377093	215	26:4368934-4369147	NC_000010.11:128287135-128287348	mUCE.1370
NW_004484798.1:29073-29392	320	26:3368298-3368616	NC_000010.11:129309680-129309998	mUCE.1371
NW_004482087.1:1028560-1028907	348	26:3095206-3095528	NC_000010.11:129603031-129603373	mUCE.1372
NW_004482087.1:830686-830919	234	26:2931854-2932086	NC_000010.11:129792250-129792482	mUCE.1373
NW_004482087.1:756774-757025	252	26:2874943-2875193	NC_000010.11:129844879-129845129	mUCE.1374
NW_004482087.1:749988-750227	240	26:2868970-2869207	NC_000010.11:129851016-129851254	mUCE.1375
NW_004482087.1:747720-747952	233	26:2866253-2866484	NC_000010.11:129853340-129853571	mUCE.1376
NW_004482087.1:713226-713441	216	26:2830446-2830660	NC_000010.11:129891000-129891214	mUCE.1377
NW_004482087.1:659942-660178	237	26:2782974-2783209	NC_000010.11:129944680-129944911	mUCE.1378
NW_004482087.1:652699-653010	312	26:2775841-2776138	NC_000010.11:129952741-129953046	mUCE.1379
NW_004487332.1:78928-79131	204	13:22357235-22357437	NC_000010.11:21743267-21743465	mUCE.1380
NW_004472083.1:689312-689569	258	13:46235872-46236104	NC_000010.11:274429-274681	mUCE.1381
NW_004497359.1:172870-173073	204	13:35467093-35467295	NC_000010.11:28595659-28595859	mUCE.1382
NW_004497359.1:173075-173296	222	13:35466876-35467090	NC_000010.11:28595862-28596082	mUCE.1383
NW_004467741.1:412341-412645	305	13:32497808-32498111	NC_000010.11:32346739-32347042	mUCE.1384
NW_004490346.1:4460673-4460952	280	13:17552477-17552754	NC_000010.11:35201231-35201509	mUCE.1385
NW_004490346.1:4452339-4452542	204	13:17544724-17544923	NC_000010.11:35211211-35211413	mUCE.1386
NW_004470889.1:98484-98699	216	28:2300217-2300429	NC_000010.11:49205987-49206201	mUCE.1387
NW_004470889.1:244863-245159	297	28:2185169-2185464	NC_000010.11:49364241-49364536	mUCE.1388
NW_004470889.1:273872-274121	250	28:2157487-2157735	NC_000010.11:49389839-49390066	mUCE.1389
NW_004490566.1:1412629-1412867	239	28:29782585-29782819	NC_000010.11:60073455-60073692	mUCE.1390
NW_004490566.1:1415434-1415688	255	28:29779677-29779928	NC_000010.11:60076347-60076600	mUCE.1391
NW_004481054.1:1060922-1061214	293	28:27679603-27679894	NC_000010.11:61892199-61892490	mUCE.1392
NW_004481054.1:1050826-1051044	219	28:27669250-27669466	NC_000010.11:61902858-61903072	mUCE.1393
NW_004481054.1:939122-939361	240	28:27559007-27559245	NC_000010.11:62020487-62020725	mUCE.1394
NW_004481054.1:899576-899812	237	28:27515169-27515403	NC_000010.11:62059358-62059592	mUCE.1395
NW_004483399.1:5256363-5256605	243	28:21081907-21082142	NC_000010.11:68067047-68067288	mUCE.1396
NW_004483399.1:5520511-5520755	245	28:20886538-20886771	NC_000010.11:68337125-68337367	mUCE.1397
NW_004483399.1:6887555-6887763	209	28:19767573-19767780	NC_000010.11:69562877-69563084	mUCE.1398
NW_004483399.1:8786401-8786607	207	28:18067700-18067904	NC_000010.11:71421421-71421626	mUCE.1399
NW_004483399.1:8916693-8916908	216	28:17939158-17939372	NC_000010.11:71551028-71551242	mUCE.1400
NW_004486445.1:427050-427285	236	28:16205804-16206038	NC_000010.11:73437302-73437536	mUCE.1401
NW_004491421.1:755394-755618	225	28:14499756-14499979	NC_000010.11:75408346-75408569	mUCE.1402
NW_004491421.1:801587-801806	220	28:14448787-14449004	NC_000010.11:75462046-75462264	mUCE.1403
NW_004491421.1:846205-846533	329	28:14397696-14398018	NC_000010.11:75508331-75508656	mUCE.1404
NW_004491421.1:874064-874302	239	28:14365477-14365709	NC_000010.11:75539270-75539507	mUCE.1405
NW_004470600.1:44454-44845	392	28:14316929-14317319	NC_000010.11:75597807-75598197	mUCE.1406
NW_004470600.1:73087-73295	209	28:14292959-14293166	NC_000010.11:75623697-75623904	mUCE.1407
NW_004470600.1:93511-93826	316	28:14274117-14274430	NC_000010.11:75639799-75640110	mUCE.1408
NW_004470600.1:142741-143161	421	28:14213763-14214183	NC_000010.11:75693445-75693863	mUCE.1409
NW_004470600.1:152643-152993	351	28:14203029-14203378	NC_000010.11:75703626-75703975	mUCE.1410
NW_004470600.1:159112-159342	231	28:14196070-14196299	NC_000010.11:75710342-75710571	mUCE.1411
NW_004470600.1:191160-191599	440	28:14158989-14159427	NC_000010.11:75736248-75736686	mUCE.1412
NW_004470600.1:193850-194382	533	28:14155669-14156197	NC_000010.11:75739339-75739870	mUCE.1413
NW_004470600.1:217092-217413	322	28:14129894-14130213	NC_000010.11:75764508-75764824	mUCE.1414
NW_004470600.1:233011-233314	304	28:14108148-14108449	NC_000010.11:75782905-75783206	mUCE.1415
NW_004470600.1:305016-305284	269	28:14057991-14058258	NC_000010.11:75839125-75839392	mUCE.1416
NW_004470600.1:310967-311242	276	28:14049989-14050260	NC_000010.11:75844274-75844548	mUCE.1417
NW_004470600.1:326976-327265	290	28:14033339-14033627	NC_000010.11:75863020-75863308	mUCE.1418
NW_004470600.1:384716-384929	214	28:13951937-13952149	NC_000010.11:75924516-75924728	mUCE.1419
NW_004470600.1:397123-397480	358	28:13940188-13940541	NC_000010.11:75937755-75938108	mUCE.1420
NW_004470600.1:397909-398117	209	28:13939538-13939748	NC_000010.11:75938537-75938742	mUCE.1421
NW_004470600.1:412143-412433	291	28:13924345-13924630	NC_000010.11:75952189-75952478	mUCE.1422
NW_004470600.1:473906-474111	206	28:13860919-13861122	NC_000010.11:76013042-76013245	mUCE.1423
NW_004470600.1:494347-494603	257	28:13836979-13837231	NC_000010.11:76035520-76035774	mUCE.1424
NW_004470600.1:1390570-1390800	231	28:12976314-12976543	NC_000010.11:76921435-76921664	mUCE.1425
NW_004475701.1:13110-13320	211	28:11631248-11631456	NC_000010.11:78371546-78371754	mUCE.1426
NW_004503702.1:107151-107352	202	28:10883058-10883258	NC_000010.11:79133847-79134046	mUCE.1427
NW_004459426.1:166505-166740	236	13:12311499-12311732	NC_000010.11:7971608-7971841	mUCE.1428
NW_004482105.1:460859-461119	261	13:13539698-13539950	NC_000010.11:9297609-9297868	mUCE.1429
NW_004465190.1:2684426-2684680	255	26:37044619-37044872	NC_000010.11:92994050-92994303	mUCE.1430
NW_004465190.1:2954536-2954764	229	26:36813910-36814137	NC_000010.11:93245777-93246004	mUCE.1431
NW_004477374.1:1940708-1940925	218	26:33380690-33380905	NC_000010.11:96954811-96955027	mUCE.1432
NW_004477374.1:3760059-3760259	201	26:31811271-31811470	NC_000010.11:98743876-98744075	mUCE.1433
NW_004470298.1:2879995-2880250	256	15:80600959-80601213	NC_000011.10:105918702-105918955	mUCE.1434
NW_004470298.1:2924691-2924901	211	15:80658002-80658211	NC_000011.10:105971765-105971974	mUCE.1435
NW_004482148.1:505975-506349	375	15:57676299-57676672	NC_000011.10:114142311-114142684	mUCE.1436
NW_004482148.1:527175-527446	272	15:57650329-57650597	NC_000011.10:114167009-114167309	mUCE.1437
NW_004482148.1:592472-592882	411	15:57582356-57582750	NC_000011.10:114229056-114229465	mUCE.1438
NW_004482148.1:616544-616792	249	15:57556174-57556414	NC_000011.10:114255736-114255983	mUCE.1439
NW_004482148.1:735762-735990	229	15:57434423-57434650	NC_000011.10:114386252-114386479	mUCE.1440
NW_004482148.1:1529668-1529871	204	15:56917951-56918148	NC_000011.10:114918343-114918545	mUCE.1441
NW_004482148.1:1707956-1708224	269	15:56714681-56714949	NC_000011.10:115097742-115098009	mUCE.1442
NW_004482148.1:1908032-1908246	215	15:56508227-56508439	NC_000011.10:115291326-115291538	mUCE.1443
NW_004482148.1:1919608-1919829	222	15:56495777-56495999	NC_000011.10:115304273-115304493	mUCE.1444
NW_004482148.1:2617958-2618179	222	15:55723905-55724127	NC_000011.10:116049707-116049927	mUCE.1445
NW_004482148.1:2702923-2703239	317	15:55615640-55615954	NC_000011.10:116129480-116129795	mUCE.1446
NW_004482148.1:2909613-2909829	217	15:55345344-55345559	NC_000011.10:116362105-116362320	mUCE.1447
NW_004482148.1:3048480-3048687	208	15:55193691-55193898	NC_000011.10:116506081-116506289	mUCE.1448
NW_004482148.1:3057913-3058132	220	15:55183838-55184056	NC_000011.10:116515402-116515620	mUCE.1449
NW_004466429.1:310642-310859	218	15:41391084-41391300	NC_000011.10:11750327-11750543	mUCE.1450
NW_004475873.1:882075-882399	325	15:53151180-53151502	NC_000011.10:118523484-118523807	mUCE.1451
NW_004480384.1:1353801-1354032	232	15:50681807-50682033	NC_000011.10:121053534-121053762	mUCE.1452
NW_004480384.1:2109696-2109906	211	15:49758966-49759171	NC_000011.10:121929396-121929603	mUCE.1453
NW_004480384.1:2109982-2110192	211	15:49758681-49758889	NC_000011.10:121929680-121929888	mUCE.1454
NW_004483051.1:2472816-2473190	375	29:27580921-27581291	NC_000011.10:124774707-124775080	mUCE.1455
NW_004481393.1:104125-104385	261	29:29366913-29367172	NC_000011.10:126697976-126698235	mUCE.1456
NW_004481393.1:167791-168042	252	29:29438857-29439106	NC_000011.10:126757044-126757294	mUCE.1457
NW_004484707.1:5006191-5006395	205	15:42475095-42475298	NC_000011.10:12846025-12846228	mUCE.1458
NW_004470253.1:437357-437596	240	29:35642179-35642417	NC_000011.10:130236844-130237082	mUCE.1459
NW_004470253.1:1801823-1802032	210	29:34505066-34505274	NC_000011.10:131668644-131668852	mUCE.1460
NW_004470253.1:2286202-2286421	220	29:34044263-34044473	NC_000011.10:132118729-132118945	mUCE.1461
NW_004470253.1:2408652-2408879	228	29:33932690-33932908	NC_000011.10:132237878-132238104	mUCE.1462
NW_004470253.1:2571296-2571498	203	29:33788585-33788786	NC_000011.10:132405442-132405643	mUCE.1463
NW_004470253.1:3215098-3215305	208	29:33216812-33217018	NC_000011.10:132999348-132999554	mUCE.1464
NW_004484707.1:4360858-4361060	203	15:43042498-43042701	NC_000011.10:13386850-13387051	mUCE.1465
NW_004484707.1:4009604-4009807	204	15:43347142-43347329	NC_000011.10:13711886-13712085	mUCE.1466
NW_004484707.1:2300896-2301108	213	15:45054845-45055056	NC_000011.10:15303488-15303698	mUCE.1467
NW_004484707.1:1888406-1888645	240	15:45466082-45466320	NC_000011.10:15657165-15657403	mUCE.1468
NW_004484707.1:1788193-1788540	348	15:45574557-45574903	NC_000011.10:15750426-15750772	mUCE.1469
NW_004484707.1:1551368-1551616	249	15:45807840-45808087	NC_000011.10:15966424-15966670	mUCE.1470
NW_004484707.1:1328208-1328517	310	15:46032708-46033016	NC_000011.10:16185568-16185870	mUCE.1471
NW_004484707.1:1323492-1323722	231	15:46039680-46039910	NC_000011.10:16192121-16192344	mUCE.1472
NW_004484707.1:1214173-1214425	253	15:46173219-46173470	NC_000011.10:16294812-16295063	mUCE.1473
NW_004484707.1:1208888-1209102	215	15:46178716-46178929	NC_000011.10:16300334-16300547	mUCE.1474
NW_004484707.1:1074337-1074753	417	15:46299763-46300178	NC_000011.10:16402949-16403364	mUCE.1475
NW_004484707.1:1027275-1027510	236	15:46338234-46338468	NC_000011.10:16440385-16440619	mUCE.1476
NW_004484707.1:849670-849884	215	15:46519409-46519622	NC_000011.10:16600166-16600379	mUCE.1477
NW_004466593.1:625452-625705	254	15:47589838-47590090	NC_000011.10:17779407-17779656	mUCE.1478
NW_004480408.1:1216987-1217219	233	29:24147077-24147308	NC_000011.10:20161831-20162062	mUCE.1479
NW_004480408.1:1292413-1292695	283	29:24076892-24077174	NC_000011.10:20247583-20247864	mUCE.1480
NW_004480408.1:1325888-1326136	249	29:24046537-24046784	NC_000011.10:20274201-20274448	mUCE.1481
NW_004458661.1:6216559-6216794	236	NW_017212051.1:1634-1861	NC_000011.10:30504644-30504878	mUCE.1482
NW_004458661.1:5998730-5998939	210	15:21394431-21394639	NC_000011.10:30715604-30715812	mUCE.1483
NW_004458661.1:5997142-5997381	240	15:21392849-21393085	NC_000011.10:30717137-30717375	mUCE.1484
NW_004458661.1:5919974-5920281	308	15:21319277-21319583	NC_000011.10:30774767-30775071	mUCE.1485
NW_004458661.1:5660952-5661186	235	15:21088155-21088381	NC_000011.10:31026341-31026572	mUCE.1486
NW_004458661.1:5551590-5551791	202	15:21008063-21008263	NC_000011.10:31106401-31106600	mUCE.1487
NW_004458661.1:5465571-5465917	347	15:20949308-20949653	NC_000011.10:31161096-31161441	mUCE.1488
NW_004458661.1:5370087-5370382	296	15:20885120-20885414	NC_000011.10:31236295-31236586	mUCE.1489
NW_004458661.1:5368155-5368393	239	15:20882870-20883102	NC_000011.10:31238300-31238535	mUCE.1490
NW_004458661.1:5358742-5358963	222	15:20873466-20873686	NC_000011.10:31247450-31247670	mUCE.1491
NW_004458661.1:5296379-5296584	206	15:20816898-20817101	NC_000011.10:31301688-31301888	mUCE.1492
NW_004458661.1:5292342-5292596	255	15:20813556-20813809	NC_000011.10:31305285-31305538	mUCE.1493
NW_004458661.1:5103438-5103687	250	15:20696210-20696458	NC_000011.10:31421843-31422091	mUCE.1494
NW_004458661.1:4997972-4998177	206	15:20626458-20626661	NC_000011.10:31480815-31481019	mUCE.1495
NW_004458661.1:4823264-4823465	202	15:20493698-20493897	NC_000011.10:31645860-31646060	mUCE.1496
NW_004458661.1:4772204-4772428	225	15:20447071-20447294	NC_000011.10:31691308-31691531	mUCE.1497
NW_004458661.1:4754533-4754784	252	15:20426232-20426482	NC_000011.10:31712679-31712929	mUCE.1498
NW_004458661.1:4754183-4754531	349	15:20425884-20426229	NC_000011.10:31712932-31713279	mUCE.1499
NW_004458661.1:4704566-4705027	462	15:20380946-20381402	NC_000011.10:31763233-31763693	mUCE.1500
NW_004458661.1:4703185-4703481	297	15:20379563-20379857	NC_000011.10:31764785-31765080	mUCE.1501
NW_004458661.1:4518476-4518821	346	15:20192101-20192444	NC_000011.10:31967910-31968253	mUCE.1502
NW_004482435.1:1286499-1286705	207	15:9347539-9347744	NC_000011.10:43555869-43556074	mUCE.1503
NW_004483454.1:1528951-1529164	214	15:2569381-2569592	NC_000011.10:57458410-57458620	mUCE.1504
NW_004482348.1:630820-631040	221	15:35524084-35524303	NC_000011.10:6214698-6214916	mUCE.1505
NW_004463163.1:375305-375514	210	29:41371400-41371605	NC_000011.10:62724247-62724455	mUCE.1506
NW_004481441.1:265752-266043	292	29:45051204-45051491	NC_000011.10:66626398-66626686	mUCE.1507
NW_004498799.1:605180-605417	238	29:45555898-45556132	NC_000011.10:67250588-67250824	mUCE.1508
NW_004466970.1:133693-133928	236	15:27007263-27007494	NC_000011.10:76535831-76536063	mUCE.1509
NW_004466970.1:131734-131934	201	15:27005406-27005605	NC_000011.10:76537762-76537961	mUCE.1510
NW_004483352.1:2497924-2498281	358	15:38091434-38091790	NC_000011.10:8254080-8254435	mUCE.1511
NW_004483352.1:2387548-2387749	202	15:38204126-38204326	NC_000011.10:8362188-8362384	mUCE.1512
NW_004493188.1:1405165-1405390	226	29:9315558-9315772	NC_000011.10:85660417-85660641	mUCE.1513
NW_004483049.1:787693-787893	201	5:63538166-63538365	NC_000012.12:100974680-100974879	mUCE.1514
NW_004458642.1:2111282-2111514	233	5:65724426-65724655	NC_000012.12:103319715-103319944	mUCE.1515
NW_004485830.1:1377145-1377367	223	5:68445039-68445259	NC_000012.12:106418378-106418596	mUCE.1516
NW_004485830.1:1405072-1405305	234	5:68474384-68474611	NC_000012.12:106446484-106446713	mUCE.1517
NW_004485830.1:1439107-1439355	249	5:68500900-68501145	NC_000012.12:106490145-106490392	mUCE.1518
NW_004485830.1:1828150-1828427	278	5:68790276-68790552	NC_000012.12:106815006-106815282	mUCE.1519
NW_004485830.1:1901239-1901466	228	5:68846512-68846738	NC_000012.12:106879656-106879882	mUCE.1520
NW_004501179.1:582782-583159	378	17:16387273-16387649	NC_000012.12:111057931-111058307	mUCE.1521
NW_004501179.1:664209-664546	338	17:16293686-16294022	NC_000012.12:111151144-111151480	mUCE.1522
NW_004501179.1:690123-690340	218	17:16267432-16267648	NC_000012.12:111181123-111181340	mUCE.1523
NW_004501179.1:778654-778878	225	17:16176716-16176939	NC_000012.12:111287430-111287650	mUCE.1524
NW_004501179.1:985665-986024	360	17:16016452-16016810	NC_000012.12:111516132-111516489	mUCE.1525
NW_004461972.1:1055425-1055678	254	17:9009869-9010112	NC_000012.12:112049433-112049685	mUCE.1526
NW_004461972.1:9658-9877	220	17:10050476-10050694	NC_000012.12:113077484-113077702	mUCE.1527
NW_004474849.1:82005-82233	229	17:10345628-10345855	NC_000012.12:113705530-113705757	mUCE.1528
NW_004474849.1:136365-136590	226	17:10371071-10371292	NC_000012.12:113762537-113762761	mUCE.1529
NW_004482824.1:1055351-1055584	234	5:96718123-96718353	NC_000012.12:11766172-11766404	mUCE.1530
NW_004481745.1:2865872-2866116	245	17:14163344-14163587	NC_000012.12:118160122-118160361	mUCE.1531
NW_004482824.1:1134234-1134435	202	5:96626722-96626921	NC_000012.12:11839127-11839322	mUCE.1532
NW_004480473.1:252945-253158	214	5:91869432-91869642	NC_000012.12:16604364-16604577	mUCE.1533
NW_004480473.1:248565-248833	269	5:91864950-91865217	NC_000012.12:16608751-16609018	mUCE.1534
NW_004480473.1:70541-70827	287	5:91619895-91620180	NC_000012.12:16786675-16786960	mUCE.1535
NW_004480473.1:68975-69288	314	5:91618342-91618654	NC_000012.12:16788199-16788510	mUCE.1536
NW_004480473.1:68490-68965	476	5:91617857-91618331	NC_000012.12:16788514-16788988	mUCE.1537
NW_004502177.1:325915-326172	258	5:91258902-91259158	NC_000012.12:17159443-17159699	mUCE.1538
NW_004462451.1:352980-353245	266	5:86010455-86010719	NC_000012.12:22767248-22767512	mUCE.1539
NW_004496362.1:63049-63463	415	5:85538044-85538457	NC_000012.12:23169638-23170050	mUCE.1540
NW_004496362.1:95836-96190	355	5:85509990-85510343	NC_000012.12:23190521-23190874	mUCE.1541
NW_004496362.1:374465-374685	221	5:85182671-85182878	NC_000012.12:23533795-23534007	mUCE.1542
NW_004496362.1:404311-404531	221	5:85141212-85141431	NC_000012.12:23564513-23564732	mUCE.1543
NW_004496362.1:437007-437225	219	5:85100773-85100988	NC_000012.12:23600887-23601104	mUCE.1544
NW_004496362.1:713446-713699	254	5:84789517-84789769	NC_000012.12:23895836-23896088	mUCE.1545
NW_004496362.1:826055-826598	544	5:84660225-84660767	NC_000012.12:24015123-24015665	mUCE.1546
NW_004496362.1:893384-893628	245	5:84582571-84582814	NC_000012.12:24081576-24081815	mUCE.1547
NW_004496362.1:1034225-1034513	289	5:84419603-84419889	NC_000012.12:24228315-24228602	mUCE.1548
NW_004496362.1:1059787-1060001	215	5:84396428-84396641	NC_000012.12:24252748-24252959	mUCE.1549
NW_004496362.1:1102191-1102446	256	NW_017215304.1:10411-10665	NC_000012.12:24281341-24281595	mUCE.1550
NW_004496362.1:1211279-1211545	267	5:84239335-84239600	NC_000012.12:24378547-24378812	mUCE.1551
NW_004480651.1:795673-795899	227	5:38881785-38882009	NC_000012.12:41437475-41437698	mUCE.1552
NW_004480651.1:632381-632665	285	5:38695906-38696188	NC_000012.12:41588091-41588374	mUCE.1553
NW_004483388.1:660697-660927	231	5:31776965-31777191	NC_000012.12:48089142-48089371	mUCE.1554
NW_004482863.1:975314-975550	237	5:30714886-30715122	NC_000012.12:48695961-48696193	mUCE.1555
NW_004471119.1:1476030-1476249	220	5:28264645-28264863	NC_000012.12:51198597-51198814	mUCE.1556
NW_004482590.1:52930-53155	226	5:26668673-26668897	NC_000012.12:53021647-53021869	mUCE.1557
NW_004482590.1:534030-534241	212	5:26291956-26292159	NC_000012.12:53467728-53467938	mUCE.1558
NW_004482590.1:764450-764661	212	5:26051498-26051707	NC_000012.12:53739643-53739852	mUCE.1559
NW_004482590.1:1016633-1016953	321	5:25797759-25798072	NC_000012.12:53972970-53973291	mUCE.1560
NW_004482590.1:1074354-1074577	224	5:25742451-25742671	NC_000012.12:54028655-54028877	mUCE.1561
NW_004482590.1:1078499-1078884	386	5:25737448-25737832	NC_000012.12:54033445-54033829	mUCE.1562
NW_004482590.1:1125922-1126127	206	5:25690935-25691134	NC_000012.12:54082679-54082877	mUCE.1563
NW_004481139.1:124586-124835	250	5:25469450-25469699	NC_000012.12:54342397-54342645	mUCE.1564
NW_004482173.1:904585-904793	209	5:56533804-56534011	NC_000012.12:56164296-56164503	mUCE.1565
NW_004482173.1:2074690-2074927	238	5:55488836-55489075	NC_000012.12:57292549-57292788	mUCE.1566
NW_004482697.1:2777845-2778053	209	5:54551583-54551790	NC_000012.12:58263881-58264088	mUCE.1567
NW_004463751.1:1147709-1147930	222	5:47444973-47445192	NC_000012.12:65675155-65675370	mUCE.1568
NW_004483009.1:243754-243958	205	5:47104133-47104336	NC_000012.12:66017341-66017544	mUCE.1569
NW_004495263.1:180062-180294	233	5:43957044-43957275	NC_000012.12:69257953-69258184	mUCE.1570
NW_004477791.1:1060419-1060648	230	5:42639753-42639981	NC_000012.12:70330261-70330489	mUCE.1571
NW_004477791.1:1083580-1083805	226	5:42620353-42620573	NC_000012.12:70353809-70354052	mUCE.1572
NW_004483129.1:1701537-1701807	271	5:14698545-14698814	NC_000012.12:85182737-85183006	mUCE.1573
NW_004473732.1:2462377-2462626	250	5:100157472-100157720	NC_000012.12:8777539-8777784	mUCE.1574
NW_004480410.1:4146563-4146765	203	5:19249191-19249389	NC_000012.12:89591120-89591319	mUCE.1575
NW_004458579.1:696000-696247	248	5:23831259-23831495	NC_000012.12:94305125-94305370	mUCE.1576
NW_004481624.1:1450544-1450771	228	5:60452722-60452948	NC_000012.12:97560883-97561109	mUCE.1577
NW_004481624.1:3034102-3034446	345	5:62015330-62015673	NC_000012.12:99154782-99155126	mUCE.1578
NW_004479389.1:7521603-7521846	244	12:9195226-9195468	NC_000013.11:100461018-100461260	mUCE.1579
NW_004479389.1:7122613-7122818	206	12:8922186-8922384	NC_000013.11:100811333-100811537	mUCE.1580
NW_004479389.1:5401775-5402057	283	12:7521154-7521433	NC_000013.11:102401370-102401651	mUCE.1581
NW_004479389.1:824559-824811	253	12:4031589-4031838	NC_000013.11:106495728-106495978	mUCE.1582
NW_004479389.1:760401-760791	391	12:3967919-3968304	NC_000013.11:106557309-106557698	mUCE.1583
NW_004483471.1:1108405-1108654	250	12:1666906-1667152	NC_000013.11:109754027-109754270	mUCE.1584
NW_004458843.1:987802-988137	336	12:963517-963849	NC_000013.11:110900408-110900741	mUCE.1585
NW_004459034.1:92313-92625	313	12:559244-559526	NC_000013.11:111678969-111679278	mUCE.1586
NW_004482607.1:717892-718105	214	12:50981230-50981442	NC_000013.11:20807401-20807615	mUCE.1587
NW_004495663.1:187667-187969	303	12:60730272-60730574	NC_000013.11:35484537-35484838	mUCE.1588
NW_004483986.1:446775-446980	206	12:67351156-67351360	NC_000013.11:49699988-49700192	mUCE.1589
NW_004481192.1:963650-963866	217	12:75722550-75722754	NC_000013.11:52931883-52932098	mUCE.1590
NW_004481192.1:8922878-8923141	264	12:84652354-84652605	NC_000013.11:60355171-60355433	mUCE.1591
NW_004458911.1:83857-84093	237	NA	NC_000013.11:63107723-63107953	mUCE.1592
NW_004483535.1:1440843-1441071	229	NA	NC_000013.11:68096049-68096276	mUCE.1593
NW_004481305.1:3155778-3156039	262	12:40864544-40864804	NC_000013.11:70959494-70959754	mUCE.1594
NW_004466832.1:264386-264593	208	12:40826924-40827130	NC_000013.11:70992465-70992671	mUCE.1595
NW_004481305.1:3387583-3387799	217	12:40625913-40626128	NC_000013.11:71219839-71220054	mUCE.1596
NW_004482802.1:1858080-1858398	319	12:40333872-40334189	NC_000013.11:71437524-71437841	mUCE.1597
NW_004482802.1:1800776-1800999	224	12:40281926-40282145	NC_000013.11:71489287-71489509	mUCE.1598
NW_004482802.1:1778200-1778407	208	12:40252653-40252859	NC_000013.11:71516601-71516807	mUCE.1599
NW_004482802.1:1744039-1744798	760	12:40214621-40215379	NC_000013.11:71546730-71547488	mUCE.1600
NW_004482802.1:1685716-1685974	259	12:40150922-40151179	NC_000013.11:71602399-71602656	mUCE.1601
NW_004482802.1:1658690-1658984	295	12:40125319-40125612	NC_000013.11:71626718-71627011	mUCE.1602
NW_004482802.1:1540517-1540734	218	12:39988713-39988929	NC_000013.11:71751184-71751400	mUCE.1603
NW_004482802.1:1518010-1518267	258	12:39961186-39961442	NC_000013.11:71773589-71773842	mUCE.1604
NW_004482802.1:1495175-1495643	469	12:39938459-39938922	NC_000013.11:71798560-71799022	mUCE.1605
NW_004482802.1:1478869-1479110	242	12:39920957-39921195	NC_000013.11:71815020-71815264	mUCE.1606
NW_004482802.1:1429922-1430143	222	12:39869604-39869817	NC_000013.11:71865920-71866126	mUCE.1607
NW_004482802.1:1295079-1295409	331	12:39763019-39763347	NC_000013.11:71960624-71960953	mUCE.1608
NW_004482802.1:1060129-1060354	226	12:39520975-39521195	NC_000013.11:72195647-72195870	mUCE.1609
NW_004482802.1:1056424-1056637	214	12:39517316-39517528	NC_000013.11:72199372-72199584	mUCE.1610
NW_004482802.1:949060-949372	313	12:39418575-39418885	NC_000013.11:72298834-72299145	mUCE.1611
NW_004482802.1:929009-929247	239	12:39400793-39401030	NC_000013.11:72316676-72316910	mUCE.1612
NW_004482802.1:885282-885483	202	12:39367060-39367260	NC_000013.11:72353423-72353623	mUCE.1613
NW_004482802.1:801839-802124	286	12:39296435-39296719	NC_000013.11:72427807-72428089	mUCE.1614
NW_004482802.1:696248-696652	405	12:39218371-39218777	NC_000013.11:72493786-72494192	mUCE.1615
NW_004482802.1:684372-684602	231	12:39205480-39205708	NC_000013.11:72505213-72505442	mUCE.1616
NW_004482802.1:676136-676503	368	12:39196737-39197101	NC_000013.11:72513648-72514013	mUCE.1617
NW_004495807.1:669761-670055	295	12:37374964-37375257	NC_000013.11:74133852-74134130	mUCE.1618
NW_004499658.1:289224-289441	218	12:33885467-33885679	NC_000013.11:77044656-77044872	mUCE.1619
NW_004487320.1:89933-90167	235	12:33099015-33099245	NC_000013.11:77822705-77822936	mUCE.1620
NW_004461823.1:355132-355464	333	12:32660947-32661278	NC_000013.11:78239916-78240247	mUCE.1621
NW_004462548.1:160343-160596	254	12:32496110-32496362	NC_000013.11:78402634-78402886	mUCE.1622
NW_004462548.1:332987-333187	201	12:32319024-32319223	NC_000013.11:78582064-78582263	mUCE.1623
NW_004462548.1:584145-584447	303	12:32123756-32124063	NC_000013.11:78778066-78778367	mUCE.1624
NW_004462548.1:774341-774707	367	12:31910003-31910367	NC_000013.11:78998793-78999157	mUCE.1625
NW_004462548.1:910646-910856	211	12:31772827-31773036	NC_000013.11:79139393-79139602	mUCE.1626
NW_004478598.1:2193410-2193651	242	12:18251320-18251560	NC_000013.11:93345901-93346138	mUCE.1627
NW_004478598.1:3824563-3824772	210	12:16726404-16726612	NC_000013.11:94864451-94864657	mUCE.1628
NW_004478598.1:3932142-3932621	480	12:16636886-16637364	NC_000013.11:94966848-94967323	mUCE.1629
NW_004482637.1:139352-139597	246	12:11728515-11728758	NC_000013.11:97393580-97393824	mUCE.1630
NW_004479389.1:8219579-8219929	351	12:9683905-9684254	NC_000013.11:99861817-99862166	mUCE.1631
NW_004479389.1:8144302-8144527	226	12:9607145-9607359	NC_000013.11:99950096-99950318	mUCE.1632
NW_004479389.1:8108500-8108729	230	12:9572246-9572475	NC_000013.11:99986550-99986773	mUCE.1633
NW_004472142.1:93271-93516	246	21:66290267-66290511	NC_000014.9:102194889-102195133	mUCE.1634
NW_004500280.1:763520-763739	220	10:77032736-77032957	NC_000014.9:21262577-21262790	mUCE.1635
NW_004500280.1:764159-764364	206	10:77033382-77033578	NC_000014.9:21263216-21263420	mUCE.1636
NW_004491548.1:571038-571261	224	21:35567727-35567949	NC_000014.9:25888284-25888506	mUCE.1637
NW_004480279.1:2228373-2228654	282	21:36158424-36158704	NC_000014.9:26444315-26444595	mUCE.1638
NW_004480279.1:2226921-2227191	271	21:36159887-36160156	NC_000014.9:26445815-26446084	mUCE.1639
NW_004480279.1:2225540-2225767	228	21:36161309-36161536	NC_000014.9:26447240-26447466	mUCE.1640
NW_004480279.1:2081720-2081921	202	21:36331619-36331818	NC_000014.9:26597256-26597456	mUCE.1641
NW_004480279.1:1044033-1044293	261	21:37355966-37356225	NC_000014.9:27436539-27436796	mUCE.1642
NW_004480279.1:130826-131034	209	21:38113612-38113819	NC_000014.9:28243109-28243316	mUCE.1643
NW_004467700.1:494228-494434	207	21:38698625-38698830	NC_000014.9:28801989-28802194	mUCE.1644
NW_004485352.1:76416-76925	510	21:38768839-38769347	NC_000014.9:28876045-28876553	mUCE.1645
NW_004485352.1:76949-77262	314	21:38769372-38769678	NC_000014.9:28876578-28876890	mUCE.1646
NW_004485352.1:484429-484751	323	21:39162400-39162721	NC_000014.9:29224175-29224495	mUCE.1647
NW_004485352.1:659738-660199	462	21:39380502-39380962	NC_000014.9:29390425-29390885	mUCE.1648
NW_004485352.1:661646-661881	236	21:39382441-39382675	NC_000014.9:29392325-29392559	mUCE.1649
NW_004485352.1:802150-802538	389	21:39509931-39510318	NC_000014.9:29528853-29529240	mUCE.1650
NW_004485352.1:1576400-1576606	207	21:40273087-40273292	NC_000014.9:30265810-30266015	mUCE.1651
NW_004485352.1:1583701-1584099	399	21:40280263-40280661	NC_000014.9:30273150-30273544	mUCE.1652
NW_004485352.1:1584101-1584434	334	21:40280664-40280994	NC_000014.9:30273547-30273879	mUCE.1653
NW_004485352.1:1652584-1652788	205	21:40349514-40349717	NC_000014.9:30330180-30330387	mUCE.1654
NW_004482754.1:2954829-2955108	280	21:41000547-41000821	NC_000014.9:30913466-30913741	mUCE.1655
NW_004482983.1:2076468-2076796	329	21:42401038-42401365	NC_000014.9:32601050-32601377	mUCE.1656
NW_004482983.1:2039172-2039529	358	21:42444402-42444755	NC_000014.9:32642035-32642390	mUCE.1657
NW_004482983.1:2032253-2032560	308	21:42453559-42453865	NC_000014.9:32648908-32649214	mUCE.1658
NW_004482983.1:2032045-2032251	207	21:42453868-42454073	NC_000014.9:32649217-32649422	mUCE.1659
NW_004482983.1:1980103-1980331	229	21:42515422-42515649	NC_000014.9:32696872-32697099	mUCE.1660
NW_004482983.1:1881782-1881999	218	21:42611062-42611277	NC_000014.9:32809303-32809519	mUCE.1661
NW_004482983.1:1711415-1711674	260	21:42755875-42756133	NC_000014.9:32949280-32949536	mUCE.1662
NW_004482983.1:1710639-1710847	209	21:42756700-42756906	NC_000014.9:32950132-32950338	mUCE.1663
NW_004482983.1:1631209-1631500	292	21:42846595-42846885	NC_000014.9:33030454-33030744	mUCE.1664
NW_004482983.1:1603727-1603994	268	21:42873278-42873544	NC_000014.9:33056311-33056577	mUCE.1665
NW_004482983.1:1472523-1472826	304	21:43032212-43032514	NC_000014.9:33207637-33207939	mUCE.1666
NW_004482983.1:1471382-1471804	423	21:43033220-43033641	NC_000014.9:33208653-33209073	mUCE.1667
NW_004482983.1:1423560-1423893	334	21:43068020-43068350	NC_000014.9:33237341-33237667	mUCE.1668
NW_004482983.1:1419176-1419532	357	21:43072272-43072627	NC_000014.9:33241550-33241906	mUCE.1669
NW_004482983.1:1189447-1189674	228	21:43314168-43314394	NC_000014.9:33456051-33456277	mUCE.1670
NW_004482983.1:1094989-1095252	264	21:43418095-43418357	NC_000014.9:33540257-33540516	mUCE.1671
NW_004482983.1:1063654-1064027	374	21:43448690-43449041	NC_000014.9:33567195-33567561	mUCE.1672
NW_004482983.1:1059441-1059644	204	21:43453901-43454101	NC_000014.9:33571448-33571650	mUCE.1673
NW_004482983.1:1023153-1023396	244	21:43490537-43490777	NC_000014.9:33599360-33599602	mUCE.1674
NW_004482983.1:1003999-1004241	243	21:43514597-43514836	NC_000014.9:33619844-33620083	mUCE.1675
NW_004482983.1:979868-980192	325	21:43538834-43539154	NC_000014.9:33641895-33642213	mUCE.1676
NW_004482983.1:961122-961607	486	21:43560255-43560739	NC_000014.9:33661109-33661593	mUCE.1677
NW_004482983.1:960828-961039	212	21:43560822-43561032	NC_000014.9:33661676-33661886	mUCE.1678
NW_004482983.1:949927-950442	516	21:43573277-43573791	NC_000014.9:33676917-33677432	mUCE.1679
NW_004482983.1:924262-924505	244	21:43590266-43590503	NC_000014.9:33693946-33694183	mUCE.1680
NW_004482983.1:917673-917879	207	21:43596939-43597143	NC_000014.9:33700379-33700584	mUCE.1681
NW_004482983.1:823782-824054	273	21:43691622-43691892	NC_000014.9:33792596-33792866	mUCE.1682
NW_004464028.1:108102-108310	209	21:45202273-45202480	NC_000014.9:35549961-35550168	mUCE.1683
NW_004464028.1:109112-109718	607	21:45203251-45203855	NC_000014.9:35550957-35551562	mUCE.1684
NW_004464028.1:268491-268773	283	21:45304810-45305091	NC_000014.9:35700136-35700417	mUCE.1685
NW_004464028.1:625934-626194	261	21:45581134-45581394	NC_000014.9:35999381-35999640	mUCE.1686
NW_004482129.1:117968-118555	588	21:45711460-45712046	NC_000014.9:36112578-36113164	mUCE.1687
NW_004482129.1:408750-408980	231	21:45959281-45959507	NC_000014.9:36345817-36346044	mUCE.1688
NW_004482129.1:491529-491912	384	21:46047563-46047945	NC_000014.9:36438961-36439343	mUCE.1689
NW_004482129.1:495031-495451	421	21:46051247-46051638	NC_000014.9:36442651-36443071	mUCE.1690
NW_004482129.1:581707-581987	281	21:46124951-46125240	NC_000014.9:36519222-36519500	mUCE.1691
NW_004482129.1:881759-882018	260	21:46424673-46424921	NC_000014.9:36791457-36791715	mUCE.1692
NW_004482129.1:1089276-1089491	216	21:46605035-46605247	NC_000014.9:36956259-36956473	mUCE.1693
NW_004482129.1:1218571-1218773	203	21:46756796-46756997	NC_000014.9:37089001-37089202	mUCE.1694
NW_004482129.1:1457404-1457680	277	21:46930998-46931273	NC_000014.9:37278966-37279241	mUCE.1695
NW_004482129.1:1457682-1457911	230	21:46931276-46931504	NC_000014.9:37279244-37279472	mUCE.1696
NW_004471592.1:2444232-2444590	359	21:48697397-48697754	NC_000014.9:39397765-39398123	mUCE.1697
NW_004501814.1:2809691-2809904	214	21:54179196-54179406	NC_000014.9:44900414-44900623	mUCE.1698
NW_004463283.1:263884-264091	208	10:36419287-36419495	NC_000014.9:54220331-54220537	mUCE.1699
NW_004463283.1:260581-260794	214	10:36415548-36415757	NC_000014.9:54224061-54224270	mUCE.1700
NW_004469636.1:1388398-1388785	388	10:34226245-34226632	NC_000014.9:56590268-56590654	mUCE.1701
NW_004469636.1:1388083-1388396	314	10:34225930-34226242	NC_000014.9:56590657-56590968	mUCE.1702
NW_004469636.1:1321935-1322477	543	10:34171303-34171844	NC_000014.9:56648857-56649396	mUCE.1703
NW_004469636.1:1163678-1163885	208	10:34021198-34021404	NC_000014.9:56816386-56816592	mUCE.1704
NW_004469636.1:1134080-1134353	274	10:33984527-33984797	NC_000014.9:56854044-56854317	mUCE.1705
NW_004469636.1:1034522-1034770	249	10:33869728-33869975	NC_000014.9:56962572-56962819	mUCE.1706
NW_004469636.1:1034300-1034520	221	10:33869505-33869725	NC_000014.9:56962822-56963040	mUCE.1707
NW_004469636.1:905640-905860	221	10:33773809-33774024	NC_000014.9:57071793-57072009	mUCE.1708
NW_004468731.1:190122-190522	401	10:32578650-32579049	NC_000014.9:58372521-58372917	mUCE.1709
NW_004491405.1:1671313-1671590	278	10:27403415-27403691	NC_000014.9:63453673-63453945	mUCE.1710
NW_004491405.1:6861010-6861259	250	10:23167553-23167801	NC_000014.9:68164744-68164988	mUCE.1711
NW_004482168.1:155932-156170	239	10:18715343-18715580	NC_000014.9:72882505-72882741	mUCE.1712
NW_004482168.1:399921-400161	241	10:18527846-18528082	NC_000014.9:73100206-73100442	mUCE.1713
NW_004473648.1:1177609-1177923	315	10:17573583-17573890	NC_000014.9:74188562-74188869	mUCE.1714
NW_004473648.1:1825682-1825926	245	10:17069467-17069710	NC_000014.9:74797566-74797809	mUCE.1715
NW_004470819.1:1502252-1502479	228	10:15444258-15444484	NC_000014.9:76313892-76314118	mUCE.1716
NW_004470819.1:793560-793767	208	10:14845662-14845869	NC_000014.9:77024527-77024731	mUCE.1717
NW_004464389.1:18563-18776	214	10:13102207-13102411	NC_000014.9:78810188-78810385	mUCE.1718
NW_004483447.1:833724-833924	201	10:12163962-12164161	NC_000014.9:79692139-79692338	mUCE.1719
NW_004483447.1:1708155-1708412	258	10:11263948-11264204	NC_000014.9:80549162-80549419	mUCE.1720
NW_004482670.1:32521-32739	219	21:59312696-59312911	NC_000014.9:95103712-95103926	mUCE.1721
NW_004482670.1:82171-82397	227	21:59340458-59340683	NC_000014.9:95133353-95133577	mUCE.1722
NW_004498524.1:85163-85493	331	21:60907402-60907731	NC_000014.9:96738421-96738746	mUCE.1723
NW_004483435.1:2353793-2354028	236	21:61006486-61006721	NC_000014.9:96843546-96843780	mUCE.1724
NW_004483435.1:2307988-2308207	220	21:61048413-61048630	NC_000014.9:96888651-96888866	mUCE.1725
NW_004483435.1:2307209-2307493	285	21:61049113-61049398	NC_000014.9:96889332-96889610	mUCE.1726
NW_004483435.1:2223557-2224128	572	21:61120632-61121202	NC_000014.9:96964862-96965429	mUCE.1727
NW_004483435.1:2201563-2201797	235	21:61145349-61145581	NC_000014.9:96986327-96986559	mUCE.1728
NW_004483435.1:2020438-2020659	222	21:61344501-61344718	NC_000014.9:97189349-97189566	mUCE.1729
NW_004483435.1:1791430-1791805	376	21:61587270-61587644	NC_000014.9:97412908-97413282	mUCE.1730
NW_004483435.1:945949-946288	340	21:62419524-62419861	NC_000014.9:98178666-98178995	mUCE.1731
NW_004483435.1:547167-547409	243	21:62762124-62762366	NC_000014.9:98497853-98498093	mUCE.1732
NW_004460636.1:529653-529891	239	21:63407348-63407584	NC_000014.9:99101716-99101953	mUCE.1733
NW_004460636.1:35765-36000	236	21:63888551-63888785	NC_000014.9:99603556-99603790	mUCE.1734
NW_004459573.1:344271-344515	245	21:1493673-1493913	NC_000015.10:25375540-25375783	mUCE.1735
NW_004482345.1:1070032-1070314	283	10:72299402-72299683	NC_000015.10:35290347-35290628	mUCE.1736
NW_004482345.1:880015-880246	232	10:72108285-72108515	NC_000015.10:35477796-35478024	mUCE.1737
NW_004482345.1:683654-683903	250	10:71886909-71887157	NC_000015.10:35654332-35654580	mUCE.1738
NW_004482345.1:625801-626049	249	10:71811735-71811982	NC_000015.10:35710144-35710391	mUCE.1739
NW_004482345.1:592649-592943	295	10:71765502-71765795	NC_000015.10:35749772-35750065	mUCE.1740
NW_004482345.1:507037-507253	217	10:71679631-71679846	NC_000015.10:35828203-35828416	mUCE.1741
NW_004482345.1:347781-348035	255	10:71494076-71494329	NC_000015.10:35957946-35958199	mUCE.1742
NW_004482345.1:335077-335316	240	10:71481913-71482151	NC_000015.10:35971151-35971389	mUCE.1743
NW_004482345.1:115802-116022	221	10:71204641-71204860	NC_000015.10:36177922-36178140	mUCE.1744
NW_004482345.1:60626-60844	219	10:71146524-71146741	NC_000015.10:36248430-36248646	mUCE.1745
NW_004503899.1:1160460-1160722	263	10:71036415-71036676	NC_000015.10:36356964-36357225	mUCE.1746
NW_004503899.1:1336569-1336919	351	10:70875450-70875799	NC_000015.10:36495463-36495812	mUCE.1747
NW_004503899.1:1371773-1372053	281	10:70842061-70842340	NC_000015.10:36527749-36528028	mUCE.1748
NW_004503899.1:1543373-1543759	387	10:70725448-70725833	NC_000015.10:36658345-36658730	mUCE.1749
NW_004503899.1:1543877-1544142	266	10:70725060-70725324	NC_000015.10:36658854-36659118	mUCE.1750
NW_004503899.1:1545080-1545309	230	10:70723896-70724124	NC_000015.10:36660065-36660293	mUCE.1751
NW_004503899.1:1551867-1552081	215	10:70714420-70714633	NC_000015.10:36667398-36667612	mUCE.1752
NW_004503899.1:1838841-1839075	235	10:70489356-70489591	NC_000015.10:36891145-36891376	mUCE.1753
NW_004503899.1:1841629-1841848	220	10:70486599-70486817	NC_000015.10:36893916-36894134	mUCE.1754
NW_004481193.1:1417369-1417601	233	10:70319510-70319740	NC_000015.10:37047751-37047981	mUCE.1755
NW_004481193.1:1387381-1387603	223	10:70289677-70289898	NC_000015.10:37077741-37077962	mUCE.1756
NW_004481193.1:1386486-1386689	204	10:70288758-70288960	NC_000015.10:37078672-37078873	mUCE.1757
NW_004481193.1:1385185-1385430	246	10:70287521-70287765	NC_000015.10:37079894-37080138	mUCE.1758
NW_004481193.1:1365015-1365240	226	10:70267645-70267863	NC_000015.10:37099825-37100042	mUCE.1759
NW_004481193.1:1234903-1235168	266	10:70128137-70128401	NC_000015.10:37229804-37230068	mUCE.1760
NW_004481193.1:1085376-1085719	344	10:70019579-70019921	NC_000015.10:37359342-37359684	mUCE.1761
NW_004481193.1:1085022-1085331	310	10:70019226-70019533	NC_000015.10:37359730-37360038	mUCE.1762
NW_004481193.1:994394-994643	250	10:69932621-69932867	NC_000015.10:37457091-37457337	mUCE.1763
NW_004481193.1:869044-869329	286	10:69849303-69849587	NC_000015.10:37577166-37577450	mUCE.1764
NW_004481193.1:835409-835631	223	10:69824551-69824772	NC_000015.10:37599221-37599441	mUCE.1765
NW_004481193.1:821645-821853	209	10:69807407-69807614	NC_000015.10:37609295-37609502	mUCE.1766
NW_004481193.1:550226-550441	216	10:69526101-69526316	NC_000015.10:37880496-37880709	mUCE.1767
NW_004481193.1:501578-501791	214	10:69480862-69481074	NC_000015.10:37932717-37932927	mUCE.1768
NW_004482288.1:2247819-2248153	335	10:330493-330829	NC_000015.10:44524486-44524818	mUCE.1769
NW_004483542.1:1162422-1162643	222	10:42060593-42060808	NC_000015.10:49137343-49137557	mUCE.1770
NW_004501992.1:685284-685581	298	10:45577012-45577308	NC_000015.10:52780351-52780647	mUCE.1771
NW_004501992.1:1446015-1446302	288	10:46335564-46335850	NC_000015.10:53447750-53448036	mUCE.1772
NW_004469546.1:2491105-2491331	227	10:50136433-50136659	NC_000015.10:57252309-57252525	mUCE.1773
NW_004469546.1:1673115-1673422	308	10:50931249-50931555	NC_000015.10:58038731-58039037	mUCE.1774
NW_004501597.1:1601348-1601636	289	10:52839978-52840264	NC_000015.10:59932423-59932709	mUCE.1775
NW_004501597.1:1509032-1509284	253	10:52906042-52906291	NC_000015.10:59998506-59998752	mUCE.1776
NW_004501597.1:1320118-1320473	356	10:53104064-53104418	NC_000015.10:60183303-60183657	mUCE.1777
NW_004501597.1:972746-972970	225	10:53278507-53278730	NC_000015.10:60344288-60344511	mUCE.1778
NW_004501597.1:798591-798837	247	10:53432149-53432394	NC_000015.10:60490438-60490681	mUCE.1779
NW_004501597.1:752053-752388	336	10:53477581-53477915	NC_000015.10:60531751-60532085	mUCE.1780
NW_004501597.1:244516-244726	211	10:54067473-54067673	NC_000015.10:61069501-61069707	mUCE.1781
NW_004460697.1:19902-20138	237	10:54324566-54324801	NC_000015.10:61308297-61308532	mUCE.1782
NW_004482265.1:435421-435624	204	10:57472146-57472348	NC_000015.10:64461439-64461641	mUCE.1783
NW_004482265.1:434824-435059	236	10:57472713-57472947	NC_000015.10:64462005-64462238	mUCE.1784
NW_004482265.1:399380-399622	243	10:57496818-57497059	NC_000015.10:64499353-64499594	mUCE.1785
NW_004482265.1:162473-162684	212	10:57668099-57668309	NC_000015.10:64685095-64685305	mUCE.1786
NW_004483497.1:204250-204570	321	10:87059876-87060197	NC_000015.10:67372970-67373289	mUCE.1787
NW_004483497.1:204572-205033	462	10:87059413-87059873	NC_000015.10:67373292-67373750	mUCE.1788
NW_004483497.1:239313-239577	265	10:87019911-87020174	NC_000015.10:67407560-67407823	mUCE.1789
NW_004483497.1:239579-239784	206	10:87019704-87019908	NC_000015.10:67407826-67408030	mUCE.1790
NW_004483497.1:353829-354041	213	10:86905443-86905654	NC_000015.10:67533294-67533505	mUCE.1791
NW_004483497.1:421141-421359	219	10:86835120-86835337	NC_000015.10:67600475-67600692	mUCE.1792
NW_004483497.1:432620-433040	421	10:86823261-86823680	NC_000015.10:67612748-67613167	mUCE.1793
NW_004483497.1:566373-566669	297	10:86724975-86725271	NC_000015.10:67723874-67724169	mUCE.1794
NW_004483497.1:574785-575112	328	10:86715967-86716293	NC_000015.10:67733054-67733379	mUCE.1795
NW_004483497.1:593996-594801	806	10:86700841-86701645	NC_000015.10:67747744-67748548	mUCE.1796
NW_004483497.1:633109-633325	217	10:86667699-86667914	NC_000015.10:67782208-67782423	mUCE.1797
NW_004483497.1:641900-642224	325	10:86655138-86655460	NC_000015.10:67787501-67787823	mUCE.1798
NW_004483497.1:670564-670878	315	10:86619958-86620271	NC_000015.10:67819956-67820269	mUCE.1799
NW_004466994.1:5160249-5160457	209	10:85639638-85639844	NC_000015.10:68819881-68820087	mUCE.1800
NW_004466994.1:4309469-4309672	204	10:84830906-84831108	NC_000015.10:69531237-69531436	mUCE.1801
NW_004466994.1:3907905-3908109	205	10:84432368-84432571	NC_000015.10:69940719-69940921	mUCE.1802
NW_004466994.1:3746173-3746409	237	10:84261810-84262045	NC_000015.10:70099829-70100064	mUCE.1803
NW_004466994.1:1776194-1776399	206	10:82514797-82515001	NC_000015.10:71893014-71893218	mUCE.1804
NW_004481490.1:389107-389318	212	10:81977536-81977746	NC_000015.10:72544770-72544981	mUCE.1805
NW_004482804.1:1539288-1539511	224	21:31201950-31202172	NC_000015.10:76355127-76355349	mUCE.1806
NW_004497567.1:533461-533717	257	21:25715159-25715410	NC_000015.10:80137615-80137853	mUCE.1807
NW_004473676.1:412393-412595	203	21:20149425-20149626	NC_000015.10:89381479-89381680	mUCE.1808
NW_004482791.1:3260802-3261063	262	21:13373512-13373772	NC_000015.10:92953342-92953602	mUCE.1809
NW_004482791.1:3263486-3263757	272	21:13370467-13370737	NC_000015.10:92956421-92956691	mUCE.1810
NW_004482791.1:4687914-4688162	249	21:11988162-11988408	NC_000015.10:94353377-94353623	mUCE.1811
NW_004482791.1:5083226-5083443	218	21:11604842-11605057	NC_000015.10:94701372-94701587	mUCE.1812
NW_004482791.1:5137327-5137534	208	21:11525997-11526203	NC_000015.10:94768534-94768726	mUCE.1813
NW_004482791.1:5248838-5249061	224	21:11403013-11403234	NC_000015.10:94892934-94893156	mUCE.1814
NW_004482791.1:5687436-5687835	400	21:11021186-11021584	NC_000015.10:95295957-95296354	mUCE.1815
NW_004482791.1:5766272-5766642	371	21:10938927-10939296	NC_000015.10:95376886-95377246	mUCE.1816
NW_004482791.1:5830383-5830697	315	21:10876657-10876968	NC_000015.10:95454862-95455174	mUCE.1817
NW_004482791.1:5841464-5841708	245	21:10864583-10864823	NC_000015.10:95464746-95464986	mUCE.1818
NW_004482791.1:5950037-5950328	292	21:10763003-10763292	NC_000015.10:95550762-95551049	mUCE.1819
NW_004482791.1:5980679-5981019	341	21:10724237-10724575	NC_000015.10:95578414-95578753	mUCE.1820
NW_004482791.1:6034522-6034759	238	21:10646318-10646550	NC_000015.10:95633841-95634075	mUCE.1821
NW_004482791.1:6498249-6498552	304	21:10194255-10194557	NC_000015.10:96011299-96011601	mUCE.1822
NW_004482791.1:6822867-6823132	266	21:9837613-9837877	NC_000015.10:96315313-96315577	mUCE.1823
NW_004482791.1:7043416-7043617	202	21:9612607-9612807	NC_000015.10:96532072-96532272	mUCE.1824
NW_004482791.1:7109128-7109330	203	21:9551792-9551993	NC_000015.10:96598505-96598700	mUCE.1825
NW_004482791.1:7166214-7166450	237	21:9493767-9494002	NC_000015.10:96645628-96645855	mUCE.1826
NW_004482791.1:7273404-7273672	269	21:9392589-9392856	NC_000015.10:96746844-96747111	mUCE.1827
NW_004482791.1:7394132-7394377	246	21:9252865-9253109	NC_000015.10:96870304-96870548	mUCE.1828
NW_004482791.1:7411767-7412098	332	21:9234735-9235063	NC_000015.10:96893144-96893464	mUCE.1829
NW_004482791.1:7921179-7921390	212	21:8666164-8666370	NC_000015.10:97411058-97411265	mUCE.1830
NW_004486803.1:84737-85019	283	25:205066-205347	NC_000016.10:228267-228547	mUCE.1831
NW_004491282.1:424589-424791	203	25:21816852-21817048	NC_000016.10:24214617-24214818	mUCE.1832
NW_004491282.1:849930-850221	292	25:22173083-22173373	NC_000016.10:24567681-24567969	mUCE.1833
NW_004491282.1:854997-855205	209	25:22177953-22178160	NC_000016.10:24572548-24572754	mUCE.1834
NW_004465991.1:1001511-1001772	262	25:23788308-23788565	NC_000016.10:26215231-26215490	mUCE.1835
NW_004488447.1:363197-363410	214	25:2177481-2177691	NC_000016.10:2768459-2768669	mUCE.1836
NW_004495488.1:432363-432587	225	25:26344909-26345129	NC_000016.10:29809529-29809748	mUCE.1837
NW_004465124.1:275639-275928	290	18:19344360-19344642	NC_000016.10:49491027-49491315	mUCE.1838
NW_004463984.1:61714-61955	242	18:19000443-19000683	NC_000016.10:49857070-49857310	mUCE.1839
NW_004463984.1:631556-631802	247	18:18521279-18521524	NC_000016.10:50391029-50391274	mUCE.1840
NW_004465915.1:288994-289208	215	18:18098027-18098240	NC_000016.10:50815076-50815289	mUCE.1841
NW_004465915.1:136008-136242	235	18:17997799-17998027	NC_000016.10:50918301-50918534	mUCE.1842
NW_004465915.1:115269-115494	226	18:17968537-17968761	NC_000016.10:50943639-50943863	mUCE.1843
NW_004495637.1:8-226	219	18:17840853-17841068	NC_000016.10:51072519-51072736	mUCE.1844
NW_004484536.1:82376-82766	391	18:17763353-17763742	NC_000016.10:51151131-51151516	mUCE.1845
NW_004484536.1:170277-170483	207	18:17674528-17674724	NC_000016.10:51237921-51238118	mUCE.1846
NW_004484536.1:589582-589795	214	18:17245453-17245665	NC_000016.10:51666970-51667182	mUCE.1847
NW_004484536.1:624690-625135	446	18:17207164-17207608	NC_000016.10:51698689-51699130	mUCE.1848
NW_004484536.1:688076-688342	267	18:17137163-17137428	NC_000016.10:51757598-51757863	mUCE.1849
NW_004484536.1:950415-950619	205	18:16848413-16848617	NC_000016.10:52002137-52002340	mUCE.1850
NW_004484536.1:1520652-1520863	212	18:16346193-16346403	NC_000016.10:52498276-52498486	mUCE.1851
NW_004473502.1:61576-61826	251	18:22543638-22543883	NC_000016.10:52650674-52650913	mUCE.1852
NW_004473502.1:137802-138291	490	18:22608866-22609351	NC_000016.10:52727385-52727873	mUCE.1853
NW_004473502.1:796310-796627	318	18:23147815-23148131	NC_000016.10:53325076-53325392	mUCE.1854
NW_004473502.1:1016384-1016641	258	18:23319499-23319754	NC_000016.10:53600679-53600934	mUCE.1855
NW_004473502.1:1042034-1042560	527	18:23338483-23339009	NC_000016.10:53620211-53620736	mUCE.1856
NW_004473502.1:1120395-1120613	219	18:23410107-23410324	NC_000016.10:53692423-53692639	mUCE.1857
NW_004473502.1:1354159-1354419	261	18:23642150-23642407	NC_000016.10:53923309-53923567	mUCE.1858
NW_004473502.1:1470423-1470685	263	18:23774962-23775217	NC_000016.10:54048743-54049003	mUCE.1859
NW_004473502.1:1481069-1481322	254	18:23786566-23786818	NC_000016.10:54059277-54059529	mUCE.1860
NW_004473502.1:1483334-1483541	208	18:23788411-23788617	NC_000016.10:54061153-54061359	mUCE.1861
NW_004473502.1:1484786-1485035	250	18:23789903-23790148	NC_000016.10:54062686-54062929	mUCE.1862
NW_004473502.1:1489103-1489372	270	18:23795053-23795318	NC_000016.10:54067268-54067536	mUCE.1863
NW_004473502.1:1531528-1531733	206	18:23839571-23839773	NC_000016.10:54105953-54106156	mUCE.1864
NW_004473502.1:1898853-1899063	211	18:24228841-24229042	NC_000016.10:54507159-54507369	mUCE.1865
NW_004473502.1:1938016-1938318	303	18:24266797-24267097	NC_000016.10:54543005-54543306	mUCE.1866
NW_004473502.1:2063100-2063311	212	18:24407790-24408000	NC_000016.10:54690186-54690396	mUCE.1867
NW_004473502.1:2286970-2287502	533	18:24603987-24604518	NC_000016.10:54921184-54921715	mUCE.1868
NW_004473502.1:2398244-2398513	270	18:24716527-24716793	NC_000016.10:55045890-55046156	mUCE.1869
NW_004473502.1:2526460-2526669	210	18:24845305-24845514	NC_000016.10:55189399-55189604	mUCE.1870
NW_004473502.1:2726702-2726985	284	18:25036046-25036329	NC_000016.10:55384327-55384609	mUCE.1871
NW_004476373.1:643288-643502	215	18:25634020-25634224	NC_000016.10:56354844-56355057	mUCE.1872
NW_004471508.1:61808-62083	276	25:4528581-4528853	NC_000016.10:5671353-5671627	mUCE.1873
NW_004501113.1:747566-747768	203	18:27704764-27704965	NC_000016.10:58599230-58599431	mUCE.1874
NW_004501113.1:1256950-1257202	253	18:28186186-28186436	NC_000016.10:59144814-59145064	mUCE.1875
NW_004490472.1:409530-409854	325	25:5023485-5023808	NC_000016.10:6204908-6205228	mUCE.1876
NW_004465956.1:721916-722138	223	18:31686574-31686796	NC_000016.10:62700764-62700985	mUCE.1877
NW_004465956.1:2892358-2892561	204	18:33652452-33652652	NC_000016.10:64618180-64618382	mUCE.1878
NW_004465956.1:3249255-3249524	270	18:33974773-33975039	NC_000016.10:64946779-64947047	mUCE.1879
NW_004490472.1:1094058-1094275	218	25:5759243-5759459	NC_000016.10:6958641-6958857	mUCE.1880
NW_004482798.1:406593-406950	358	18:37997039-37997395	NC_000016.10:69647246-69647602	mUCE.1881
NW_004476803.1:740669-741091	423	18:40441101-40441517	NC_000016.10:71856933-71857354	mUCE.1882
NW_004490472.1:1336919-1337123	205	25:6015451-6015651	NC_000016.10:7219165-7219363	mUCE.1883
NW_004471029.1:991974-992293	320	18:39623700-39624018	NC_000016.10:72787132-72787450	mUCE.1884
NW_004471029.1:1004781-1005005	225	18:39611068-39611290	NC_000016.10:72800383-72800603	mUCE.1885
NW_004471029.1:1037110-1037416	307	18:39578144-39578447	NC_000016.10:72835191-72835496	mUCE.1886
NW_004471029.1:1062195-1062450	256	18:39555069-39555321	NC_000016.10:72858432-72858682	mUCE.1887
NW_004471029.1:1474618-1474898	281	18:39161464-39161741	NC_000016.10:73318533-73318811	mUCE.1888
NW_004471029.1:1697124-1697369	246	18:38957802-38958046	NC_000016.10:73545966-73546210	mUCE.1889
NW_004490472.1:1467647-1467912	266	25:6185168-6185432	NC_000016.10:7369417-7369681	mUCE.1890
NW_004471029.1:2110315-2110541	227	18:38553940-38554158	NC_000016.10:73972262-73972485	mUCE.1891
NW_004482798.1:64520-64849	330	18:38262937-38263265	NC_000016.10:74274826-74275151	mUCE.1892
NW_004490472.1:1872205-1872424	220	25:6653406-6653624	NC_000016.10:7835028-7835246	mUCE.1893
NW_004491788.1:1080111-1080365	255	18:7033393-7033646	NC_000016.10:78798685-78798938	mUCE.1894
NW_004491788.1:1029144-1029355	212	18:7084794-7085000	NC_000016.10:78855098-78855308	mUCE.1895
NW_004491788.1:989268-989581	314	18:7107143-7107455	NC_000016.10:78885268-78885580	mUCE.1896
NW_004491788.1:983364-983598	235	18:7115467-7115700	NC_000016.10:78891465-78891698	mUCE.1897
NW_004491788.1:543433-543736	304	18:7519094-7519395	NC_000016.10:79348130-79348432	mUCE.1898
NW_004491788.1:315481-315694	214	18:7742107-7742319	NC_000016.10:79597124-79597336	mUCE.1899
NW_004463647.1:1752106-1752321	216	18:8172953-8173167	NC_000016.10:79928704-79928918	mUCE.1900
NW_004463647.1:1300606-1300924	319	18:8554532-8554849	NC_000016.10:80389844-80390161	mUCE.1901
NW_004487123.1:17890-18120	231	18:14433204-14433430	NC_000016.10:87491856-87492082	mUCE.1902
NW_004480555.1:248357-248582	226	25:7789628-7789853	NC_000016.10:9116635-9116857	mUCE.1903
NW_004457924.1:1198990-1199307	318	19:33052617-33052926	NC_000017.11:16151392-16151708	mUCE.1904
NW_004502368.1:480554-480839	286	19:22879566-22879847	NC_000017.11:2063174-2063453	mUCE.1905
NW_004502368.1:475732-475938	207	19:22884189-22884394	NC_000017.11:2068318-2068523	mUCE.1906
NW_004502368.1:462562-462764	203	19:22898437-22898634	NC_000017.11:2085708-2085906	mUCE.1907
NW_004502368.1:328240-328493	254	19:23003216-23003465	NC_000017.11:2213500-2213752	mUCE.1908
NW_004472461.1:27224-27451	228	19:20106713-20106939	NC_000017.11:28905416-28905640	mUCE.1909
NW_004472461.1:34095-34312	218	19:20113530-20113745	NC_000017.11:28913109-28913320	mUCE.1910
NW_004473369.1:111075-111275	201	19:17851396-17851595	NC_000017.11:31937130-31937329	mUCE.1911
NW_004473369.1:620130-620348	219	19:17453548-17453762	NC_000017.11:32366589-32366800	mUCE.1912
NW_004473369.1:625579-625805	227	19:17448073-17448298	NC_000017.11:32373356-32373581	mUCE.1913
NW_004473369.1:629621-629837	217	19:17444451-17444664	NC_000017.11:32377813-32378028	mUCE.1914
NW_004473383.1:587184-587709	526	19:39489321-39489844	NC_000017.11:39410202-39410724	mUCE.1915
NW_004473383.1:693069-693306	238	19:39601894-39602129	NC_000017.11:39579471-39579707	mUCE.1916
NW_004473383.1:727800-728044	245	19:39639942-39640186	NC_000017.11:39618414-39618655	mUCE.1917
NW_004465229.1:849037-849288	252	19:40497638-40497888	NC_000017.11:40642410-40642660	mUCE.1918
NW_004465229.1:852151-852379	229	19:40500598-40500825	NC_000017.11:40645477-40645704	mUCE.1919
NW_004484564.1:501827-502031	205	19:42060622-42060808	NC_000017.11:42316759-42316958	mUCE.1920
NW_004467662.1:1032092-1032323	232	19:43674659-43674889	NC_000017.11:44220840-44221070	mUCE.1921
NW_004467662.1:778440-778658	219	19:43893057-43893270	NC_000017.11:44466999-44467211	mUCE.1922
NW_004480269.1:335753-335958	206	19:44360205-44360408	NC_000017.11:45031734-45031936	mUCE.1923
NW_004467333.1:391157-391542	386	19:37985182-37985566	NC_000017.11:48144343-48144727	mUCE.1924
NW_004467333.1:401393-401702	310	19:37975159-37975467	NC_000017.11:48156055-48156361	mUCE.1925
NW_004467333.1:486877-487089	213	19:37894058-37894268	NC_000017.11:48242446-48242656	mUCE.1926
NW_004467333.1:536782-537017	236	19:37836157-37836391	NC_000017.11:48294074-48294308	mUCE.1927
NW_004467333.1:559353-559608	256	19:37822937-37823191	NC_000017.11:48307381-48307635	mUCE.1928
NW_004473870.1:1135-1470	336	19:37516359-37516693	NC_000017.11:48610717-48611051	mUCE.1929
NW_004497271.1:306113-306423	311	19:35539864-35540169	NC_000017.11:50862397-50862708	mUCE.1930
NW_004498495.1:7813313-7813523	211	19:6886818-6887027	NC_000017.11:56482056-56482265	mUCE.1931
NW_004498495.1:7714309-7714515	207	19:6995926-6996129	NC_000017.11:56593551-56593742	mUCE.1932
NW_004501999.1:412791-412991	201	19:25770906-25771105	NC_000017.11:5669016-5669211	mUCE.1933
NW_004498495.1:6755407-6755692	286	19:8001296-8001581	NC_000017.11:57567159-57567443	mUCE.1934
NW_004498495.1:6625319-6625575	257	19:8105382-8105638	NC_000017.11:57682325-57682578	mUCE.1935
NW_004480675.1:161608-161816	209	19:8379721-8379925	NC_000017.11:57973801-57974007	mUCE.1936
NW_004480675.1:191807-192020	214	19:8409081-8409293	NC_000017.11:58004064-58004276	mUCE.1937
NW_004480675.1:193534-193735	202	19:8410802-8410997	NC_000017.11:58005790-58005980	mUCE.1938
NW_004478079.1:375464-375684	221	19:10281617-10281829	NC_000017.11:59686841-59687058	mUCE.1939
NW_004465839.1:797810-798126	317	19:11514960-11515275	NC_000017.11:61196308-61196623	mUCE.1940
NW_004465839.1:881584-881908	325	19:11434640-11434964	NC_000017.11:61289482-61289801	mUCE.1941
NW_004465839.1:965583-965815	233	19:11348248-11348479	NC_000017.11:61380834-61381062	mUCE.1942
NW_004480507.1:393514-393731	218	19:10893919-10894134	NC_000017.11:61816083-61816299	mUCE.1943
NW_004480381.1:1228317-1228561	245	19:61364770-61365008	NC_000017.11:65528563-65528804	mUCE.1944
NW_004480381.1:868122-868360	239	19:61593438-61593673	NC_000017.11:65903045-65903282	mUCE.1945
NW_004460226.1:1313390-1313656	267	19:57782333-57782589	NC_000017.11:72488931-72489192	mUCE.1946
NW_004491378.1:54991-55197	207	19:56829769-56829974	NC_000017.11:73775153-73775358	mUCE.1947
NW_004479080.1:151552-151754	203	19:27304701-27304903	NC_000017.11:7883859-7884060	mUCE.1948
NW_004479080.1:126601-126824	224	NA	NC_000017.11:7910395-7910617	mUCE.1949
NW_004498146.1:64256-64505	250	19:28215657-28215903	NC_000017.11:9028538-9028781	mUCE.1950
NW_004481902.1:3199528-3199742	215	24:32393697-32393910	NC_000018.10:24656553-24656766	mUCE.1951
NW_004481902.1:3408791-3409098	308	24:32207868-32208174	NC_000018.10:24868033-24868339	mUCE.1952
NW_004481902.1:3646572-3646803	232	24:31999022-31999252	NC_000018.10:25078133-25078363	mUCE.1953
NW_004481902.1:3657854-3658119	266	24:31986712-31986976	NC_000018.10:25089959-25090223	mUCE.1954
NW_004481902.1:3726073-3726542	470	24:31928144-31928611	NC_000018.10:25143963-25144431	mUCE.1955
NW_004481902.1:3729589-3729837	249	24:31923881-31924124	NC_000018.10:25147427-25147672	mUCE.1956
NW_004481902.1:3747666-3748062	397	24:31903444-31903839	NC_000018.10:25168124-25168519	mUCE.1957
NW_004481902.1:3754768-3755073	306	24:31896092-31896397	NC_000018.10:25174673-25174977	mUCE.1958
NW_004481902.1:3821291-3821565	275	24:31821356-31821629	NC_000018.10:25241917-25242190	mUCE.1959
NW_004481902.1:3859873-3860392	520	24:31775808-31776323	NC_000018.10:25285076-25285592	mUCE.1960
NW_004481902.1:3863392-3863623	232	24:31772575-31772808	NC_000018.10:25288602-25288832	mUCE.1961
NW_004481902.1:4305667-4305900	234	24:31357361-31357588	NC_000018.10:25679471-25679703	mUCE.1962
NW_004481902.1:4702897-4703098	202	24:31057314-31057514	NC_000018.10:26035803-26036003	mUCE.1963
NW_004481902.1:5007938-5008307	370	24:30861410-30861778	NC_000018.10:26335545-26335913	mUCE.1964
NW_004481902.1:5008434-5008638	205	24:30861053-30861256	NC_000018.10:26336043-26336246	mUCE.1965
NW_004481902.1:5359792-5360079	288	24:30557082-30557366	NC_000018.10:26657223-26657509	mUCE.1966
NW_004474712.1:3097549-3097761	213	24:29062293-29062502	NC_000018.10:28105199-28105410	mUCE.1967
NW_004494830.1:826388-826606	219	24:24688232-24688449	NC_000018.10:32772985-32773202	mUCE.1968
NW_004494830.1:826037-826379	343	24:24687885-24688215	NC_000018.10:32773214-32773552	mUCE.1969
NW_004494830.1:718973-719302	330	24:24563806-24564133	NC_000018.10:32887829-32888153	mUCE.1970
NW_004494830.1:486465-486673	209	24:24317812-24318018	NC_000018.10:33129053-33129260	mUCE.1971
NW_004494830.1:425902-426432	531	24:24255559-24256086	NC_000018.10:33183152-33183683	mUCE.1972
NW_004487638.1:369291-369503	213	24:37954499-37954709	NC_000018.10:3502418-3502629	mUCE.1973
NW_004486682.1:668357-668796	440	24:20465696-20466134	NC_000018.10:36900356-36900793	mUCE.1974
NW_004486682.1:883773-884022	250	24:20236136-20236384	NC_000018.10:37139922-37140170	mUCE.1975
NW_004486682.1:1096664-1096891	228	24:20025059-20025270	NC_000018.10:37326833-37327059	mUCE.1976
NW_004486432.1:215995-216212	218	24:19621583-19621799	NC_000018.10:37714837-37715053	mUCE.1977
NW_004486432.1:338745-338972	228	24:19463776-19464001	NC_000018.10:37889454-37889678	mUCE.1978
NW_004486432.1:356328-356602	275	24:19437054-19437327	NC_000018.10:37906529-37906801	mUCE.1979
NW_004486432.1:435233-435452	220	24:19334305-19334523	NC_000018.10:37984823-37985041	mUCE.1980
NW_004486432.1:435454-435687	234	24:19334072-19334302	NC_000018.10:37985044-37985276	mUCE.1981
NW_004486432.1:958052-958273	222	24:18799615-18799834	NC_000018.10:38444701-38444921	mUCE.1982
NW_004486432.1:958278-958485	208	24:18799404-18799609	NC_000018.10:38444927-38445132	mUCE.1983
NW_004486432.1:1605426-1605748	323	24:17964679-17964999	NC_000018.10:39072886-39073207	mUCE.1984
NW_004486432.1:1709262-1709484	223	24:17858430-17858651	NC_000018.10:39184116-39184335	mUCE.1985
NW_004486432.1:1709490-1709699	210	24:17858215-17858423	NC_000018.10:39184342-39184550	mUCE.1986
NW_004486432.1:1842703-1842930	228	24:17678526-17678747	NC_000018.10:39341170-39341394	mUCE.1987
NW_004486432.1:2121861-2122101	241	24:17361966-17362204	NC_000018.10:39605330-39605569	mUCE.1988
NW_004486432.1:2553602-2553856	255	24:16866220-16866473	NC_000018.10:40036880-40037133	mUCE.1989
NW_004486432.1:2625194-2625412	219	24:16739522-16739736	NC_000018.10:40096603-40096817	mUCE.1990
NW_004486432.1:2973161-2973373	213	24:16287653-16287863	NC_000018.10:40443116-40443326	mUCE.1991
NW_004486432.1:3415360-3415588	229	24:15633479-15633706	NC_000018.10:40875398-40875625	mUCE.1992
NW_004486432.1:3998083-3998440	358	24:14816685-14817041	NC_000018.10:41500063-41500419	mUCE.1993
NW_004486432.1:4139616-4139832	217	24:14648487-14648702	NC_000018.10:41617609-41617824	mUCE.1994
NW_004503912.1:1134273-1134549	277	24:46420203-46420478	NC_000018.10:46460390-46460665	mUCE.1995
NW_004503912.1:754152-754357	206	24:46770215-46770409	NC_000018.10:46820942-46821146	mUCE.1996
NW_004503912.1:32787-33217	431	24:47386688-47387117	NC_000018.10:47511235-47511664	mUCE.1997
NW_004482175.1:107691-107919	229	24:47427708-47427935	NC_000018.10:47561219-47561447	mUCE.1998
[truncated: 193 more rows]

## Sheet: S4
Supplemental Table S4: Genomic coordinates of avian UCEs.
Ancestor location	Length (based on ancestor locatio)	Chicken location	Name
NW_009270644.1:2912922-2913165	244	NC_006088.5:100138914-100139153	aUCE.0001
NW_009270644.1:2912030-2912388	359	NC_006088.5:100139658-100140016	aUCE.0002
NW_009270644.1:2853836-2854170	335	NC_006088.5:100196798-100197131	aUCE.0003
NW_009270644.1:2792428-2792724	297	NC_006088.5:100256099-100256391	aUCE.0004
NW_009270644.1:2764419-2764833	415	NC_006088.5:100283897-100284310	aUCE.0005
NW_009270644.1:2614990-2615243	254	NC_006088.5:100426348-100426591	aUCE.0006
NW_009271586.1:2449904-2450232	329	NC_006088.5:10160486-10160813	aUCE.0007
NW_009270644.1:595431-595685	255	NC_006088.5:102248019-102248269	aUCE.0008
NW_009270866.1:695872-696074	203	NC_006088.5:103637591-103637792	aUCE.0009
NW_009270601.1:4675833-4676048	216	NC_006088.5:104339019-104339233	aUCE.0010
NW_009270601.1:3921366-3921572	207	NC_006088.5:105052353-105052550	aUCE.0011
NW_009270601.1:2443174-2443429	256	NC_006088.5:106383870-106384124	aUCE.0012
NW_009270601.1:2287111-2287349	239	NC_006088.5:106497315-106497551	aUCE.0013
NW_009270601.1:2260570-2260786	217	NC_006088.5:106517495-106517710	aUCE.0014
NW_009270601.1:2208688-2209030	343	NC_006088.5:106548100-106548441	aUCE.0015
NW_009270601.1:1741179-1741460	282	NC_006088.5:106913677-106913957	aUCE.0016
NW_009270601.1:1244275-1244548	274	NC_006088.5:107351187-107351456	aUCE.0017
NW_009270601.1:1009176-1009413	238	NC_006088.5:107551070-107551303	aUCE.0018
NW_009270601.1:920015-920314	300	NC_006088.5:107636063-107636361	aUCE.0019
NW_009270601.1:902082-902307	226	NC_006088.5:107653277-107653500	aUCE.0020
NW_009270601.1:796482-796884	403	NC_006088.5:107757373-107757774	aUCE.0021
NW_009271512.1:20569-20803	235	NC_006088.5:108523078-108523311	aUCE.0022
NW_009271512.1:104618-104927	310	NC_006088.5:108593174-108593479	aUCE.0023
NW_009271512.1:506863-507115	253	NC_006088.5:108972521-108972769	aUCE.0024
NW_009271512.1:507211-507425	215	NC_006088.5:108972869-108973082	aUCE.0025
NW_009271512.1:1530376-1530640	265	NC_006088.5:109894193-109894450	aUCE.0026
NW_009271512.1:1580843-1581047	205	NC_006088.5:109942842-109943042	aUCE.0027
NW_009271512.1:2881563-2881856	294	NC_006088.5:111053943-111054248	aUCE.0028
NW_009271512.1:4117406-4117892	487	NC_006088.5:112149009-112149494	aUCE.0029
NW_009271512.1:4120091-4120340	250	NC_006088.5:112151645-112151892	aUCE.0030
NW_009270298.1:44594-44820	227	NC_006088.5:113288791-113289017	aUCE.0031
NW_009270298.1:97424-97629	206	NC_006088.5:113328172-113328376	aUCE.0032
NW_009270298.1:97631-97838	208	NC_006088.5:113328379-113328585	aUCE.0033
NW_009270298.1:165335-165542	208	NC_006088.5:113383479-113383670	aUCE.0034
NW_009270298.1:216180-216477	298	NC_006088.5:113425908-113426204	aUCE.0035
NW_009270022.1:26323-26537	215	NC_006088.5:113669912-113670097	aUCE.0036
NW_009270022.1:1988-2269	282	NC_006088.5:113683484-113683739	aUCE.0037
NW_009272080.1:2666974-2667564	591	NC_006088.5:113713073-113713653	aUCE.0038
NW_009272080.1:2644328-2644584	257	NC_006088.5:113729301-113729556	aUCE.0039
NW_009272080.1:2625247-2625595	349	NC_006088.5:113743814-113744161	aUCE.0040
NW_009272080.1:857101-857302	202	NC_006088.5:115315120-115315321	aUCE.0041
NW_009271895.1:768480-768717	238	NC_006088.5:116194673-116194909	aUCE.0042
NW_009270489.1:1637959-1638242	284	NC_006088.5:119224820-119225102	aUCE.0043
NW_009270489.1:1605800-1606059	260	NC_006088.5:119256829-119257086	aUCE.0044
NW_009270489.1:1579194-1579474	281	NC_006088.5:119274517-119274764	aUCE.0045
NW_009270489.1:1572085-1572852	768	NC_006088.5:119280367-119281134	aUCE.0046
NW_009270489.1:1565935-1566238	304	NC_006088.5:119285972-119286152	aUCE.0047
NW_009270489.1:1542884-1543118	235	NC_006088.5:119307316-119307549	aUCE.0048
NW_009270489.1:1530837-1531350	514	NC_006088.5:119317108-119317620	aUCE.0049
NW_009270489.1:1512358-1512753	396	NC_006088.5:119329243-119329635	aUCE.0050
NW_009270489.1:1510619-1511742	1124	NC_006088.5:119330244-119331369	aUCE.0051
NW_009270489.1:1493388-1494218	831	NC_006088.5:119346968-119347795	aUCE.0052
NW_009270489.1:1473809-1474041	233	NC_006088.5:119364860-119365091	aUCE.0053
NW_009270489.1:1466680-1467149	470	NC_006088.5:119371118-119371586	aUCE.0054
NW_009270489.1:1178129-1178365	237	NC_006088.5:119614656-119614890	aUCE.0055
NW_009270489.1:1174492-1174726	235	NC_006088.5:119618190-119618418	aUCE.0056
NW_009270489.1:858657-858876	220	NC_006088.5:119881041-119881254	aUCE.0057
NW_009270727.1:2710298-2710536	239	NC_006088.5:121203983-121204202	aUCE.0058
NW_009270727.1:1521862-1522083	222	NC_006088.5:122209208-122209426	aUCE.0059
NW_009270727.1:1391148-1391352	205	NC_006088.5:122357319-122357522	aUCE.0060
NW_009270760.1:2003217-2003640	424	NC_006088.5:12325156-12325578	aUCE.0061
NW_009270760.1:1887046-1887446	401	NC_006088.5:12440523-12440921	aUCE.0062
NW_009270760.1:1886776-1887044	269	NC_006088.5:12440924-12441191	aUCE.0063
NW_009271867.1:1927758-1928033	276	NC_006088.5:125411832-125412103	aUCE.0064
NW_009270760.1:1761081-1761296	216	NC_006088.5:12558658-12558873	aUCE.0065
NW_009270760.1:1760867-1761079	213	NC_006088.5:12558876-12559088	aUCE.0066
NW_009270760.1:1640543-1640899	357	NC_006088.5:12654915-12655270	aUCE.0067
NW_009270550.1:5682313-5682705	393	NC_006088.5:130655851-130656242	aUCE.0068
NW_009270550.1:5671190-5671461	272	NC_006088.5:130667886-130668156	aUCE.0069
NW_009270550.1:5657470-5657706	237	NC_006088.5:130681730-130681966	aUCE.0070
NW_009270550.1:5505121-5505325	205	NC_006088.5:130822099-130822302	aUCE.0071
NW_009270550.1:5504766-5505060	295	NC_006088.5:130822364-130822657	aUCE.0072
NW_009270550.1:5473154-5473404	251	NC_006088.5:130852870-130853119	aUCE.0073
NW_009270550.1:5413854-5414231	378	NC_006088.5:130909108-130909481	aUCE.0074
NW_009270550.1:5404959-5405247	289	NC_006088.5:130916293-130916580	aUCE.0075
NW_009270550.1:5402285-5402530	246	NC_006088.5:130918673-130918917	aUCE.0076
NW_009270550.1:5328946-5329150	205	NC_006088.5:130995815-130996016	aUCE.0077
NW_009270550.1:5287652-5288134	483	NC_006088.5:131035123-131035604	aUCE.0078
NW_009270550.1:5285231-5285458	228	NC_006088.5:131037581-131037804	aUCE.0079
NW_009270550.1:5275435-5275644	210	NC_006088.5:131045129-131045335	aUCE.0080
NW_009270550.1:5240007-5240247	241	NC_006088.5:131075812-131076051	aUCE.0081
NW_009270550.1:5238644-5238899	256	NC_006088.5:131077152-131077406	aUCE.0082
NW_009270550.1:5184180-5184418	239	NC_006088.5:131129959-131130194	aUCE.0083
NW_009270550.1:5168310-5168672	363	NC_006088.5:131142244-131142605	aUCE.0084
NW_009270550.1:5162555-5162792	238	NC_006088.5:131148225-131148461	aUCE.0085
NW_009270550.1:5135609-5136008	400	NC_006088.5:131171861-131172259	aUCE.0086
NW_009270550.1:5118757-5119350	594	NC_006088.5:131190129-131190718	aUCE.0087
NW_009270550.1:5103800-5104191	392	NC_006088.5:131204488-131204878	aUCE.0088
NW_009270550.1:4837357-4837582	226	NC_006088.5:131437350-131437574	aUCE.0089
NW_009270550.1:4508759-4509016	258	NC_006088.5:131706857-131707113	aUCE.0090
NW_009270550.1:2824904-2825116	213	NC_006088.5:133209206-133209417	aUCE.0091
NW_009270550.1:1993198-1993432	235	NC_006088.5:133890531-133890759	aUCE.0092
NW_009270550.1:1777791-1778031	241	NC_006088.5:134089041-134089277	aUCE.0093
NW_009270550.1:1743269-1743487	219	NC_006088.5:134123328-134123545	aUCE.0094
NW_009270550.1:1741044-1741268	225	NC_006088.5:134125436-134125659	aUCE.0095
NW_009270550.1:1740809-1741042	234	NC_006088.5:134125662-134125894	aUCE.0096
NW_009270550.1:1549044-1549267	224	NC_006088.5:134309491-134309713	aUCE.0097
NW_009270550.1:1144256-1144475	220	NC_006088.5:134667794-134668012	aUCE.0098
NW_009270760.1:689063-689338	276	NC_006088.5:13479376-13479650	aUCE.0099
NW_009270550.1:766207-766451	245	NC_006088.5:135009784-135010027	aUCE.0100
NW_009270550.1:308983-309555	573	NC_006088.5:135412196-135412767	aUCE.0101
NW_009270550.1:296043-296471	429	NC_006088.5:135424410-135424837	aUCE.0102
NW_009270550.1:280798-281020	223	NC_006088.5:135438329-135438550	aUCE.0103
NW_009270550.1:234688-234899	212	NC_006088.5:135484116-135484326	aUCE.0104
NW_009270550.1:221013-221276	264	NC_006088.5:135496883-135497145	aUCE.0105
NW_009270550.1:193803-194067	265	NC_006088.5:135522059-135522322	aUCE.0106
NW_009270550.1:193015-193246	232	NC_006088.5:135522853-135523077	aUCE.0107
NW_009270550.1:133352-133773	422	NC_006088.5:135586073-135586493	aUCE.0108
NW_009270550.1:131024-131227	204	NC_006088.5:135588263-135588465	aUCE.0109
NW_009270550.1:127095-127377	283	NC_006088.5:135592094-135592372	aUCE.0110
NW_009270550.1:126437-126706	270	NC_006088.5:135592757-135593025	aUCE.0111
NW_009270550.1:101482-101998	517	NC_006088.5:135615906-135616421	aUCE.0112
NW_009270550.1:83270-83485	216	NC_006088.5:135632351-135632565	aUCE.0113
NW_009270550.1:82755-83131	377	NC_006088.5:135632705-135633080	aUCE.0114
NW_009270550.1:65280-65717	438	NC_006088.5:135649810-135650245	aUCE.0115
NW_009271069.1:1259790-1260123	334	NC_006088.5:135755596-135755928	aUCE.0116
NW_009271069.1:1244268-1244496	229	NC_006088.5:135768813-135769040	aUCE.0117
NW_009271069.1:1225546-1226116	571	NC_006088.5:135785996-135786565	aUCE.0118
NW_009271069.1:1207224-1207552	329	NC_006088.5:135809903-135810230	aUCE.0119
NW_009271069.1:1196674-1196936	263	NC_006088.5:135820767-135821028	aUCE.0120
NW_009271069.1:1119720-1119941	222	NC_006088.5:135888048-135888263	aUCE.0121
NW_009271069.1:1112502-1113063	562	NC_006088.5:135895110-135895669	aUCE.0122
NW_009271069.1:1088412-1088702	291	NC_006088.5:135917197-135917485	aUCE.0123
NW_009271069.1:1064399-1064932	534	NC_006088.5:135938455-135938980	aUCE.0124
NW_009271069.1:1009548-1009756	209	NC_006088.5:135988071-135988278	aUCE.0125
NW_009271069.1:989064-989437	374	NC_006088.5:136008179-136008551	aUCE.0126
NW_009271069.1:982190-982682	493	NC_006088.5:136016514-136016999	aUCE.0127
NW_009271069.1:970081-970377	297	NC_006088.5:136027813-136028102	aUCE.0128
NW_009271069.1:912234-912582	349	NC_006088.5:136085061-136085407	aUCE.0129
NW_009271069.1:909097-909320	224	NC_006088.5:136088187-136088400	aUCE.0130
NW_009271069.1:890188-890447	260	NC_006088.5:136105012-136105270	aUCE.0131
NW_009271069.1:843271-843549	279	NC_006088.5:136146741-136147018	aUCE.0132
NW_009271069.1:838655-839118	464	NC_006088.5:136151116-136151578	aUCE.0133
NW_009271069.1:796196-796435	240	NC_006088.5:136194381-136194617	aUCE.0134
NW_009271069.1:789546-789751	206	NC_006088.5:136200971-136201175	aUCE.0135
NW_009271069.1:775236-775478	243	NC_006088.5:136214651-136214893	aUCE.0136
NW_009271069.1:725400-725628	229	NC_006088.5:136259854-136260040	aUCE.0137
NW_009271069.1:724935-725252	318	NC_006088.5:136260208-136260518	aUCE.0138
NW_009271069.1:719229-719783	555	NC_006088.5:136265533-136266086	aUCE.0139
NW_009271069.1:715424-715657	234	NC_006088.5:136268671-136268903	aUCE.0140
NW_009271069.1:691072-691368	297	NC_006088.5:136287673-136287968	aUCE.0141
NW_009271069.1:582423-582639	217	NC_006088.5:136380578-136380793	aUCE.0142
NW_009271069.1:285902-286159	258	NC_006088.5:136632524-136632780	aUCE.0143
NW_009270760.1:416388-416764	377	NC_006088.5:13716334-13716708	aUCE.0144
NW_009270154.1:1868069-1868345	277	NC_006088.5:139681841-139682090	aUCE.0145
NW_009270154.1:720449-720690	242	NC_006088.5:140691542-140691762	aUCE.0146
NW_009270154.1:662627-663061	435	NC_006088.5:140737982-140738414	aUCE.0147
NW_009270154.1:594743-595396	654	NC_006088.5:140795404-140796056	aUCE.0148
NW_009270154.1:494085-494417	333	NC_006088.5:140888340-140888668	aUCE.0149
NW_009270154.1:488204-488528	325	NC_006088.5:140894824-140895147	aUCE.0150
NW_009270154.1:461378-461640	263	NC_006088.5:140919711-140919968	aUCE.0151
NW_009270154.1:458542-458775	234	NC_006088.5:140921735-140921967	aUCE.0152
NW_009270154.1:405625-405876	252	NC_006088.5:140973588-140973838	aUCE.0153
NW_009270154.1:388310-388561	252	NC_006088.5:140990544-140990791	aUCE.0154
NW_009270154.1:284265-284465	201	NC_006088.5:141085742-141085940	aUCE.0155
NW_009270154.1:271502-271923	422	NC_006088.5:141096697-141097115	aUCE.0156
NW_009270154.1:268153-268609	457	NC_006088.5:141099971-141100426	aUCE.0157
NW_009270154.1:207196-207564	369	NC_006088.5:141150705-141151071	aUCE.0158
NW_009270154.1:185262-185519	258	NC_006088.5:141166716-141166960	aUCE.0159
NW_009270154.1:156916-157181	266	NC_006088.5:141193510-141193774	aUCE.0160
NW_009270525.1:3111656-3111889	234	NC_006088.5:14157292-14157524	aUCE.0161
NW_009270501.1:2443757-2444037	281	NC_006088.5:141812840-141813119	aUCE.0162
NW_009270501.1:1948528-1948742	215	NC_006088.5:142254259-142254471	aUCE.0163
NW_009270501.1:1693224-1693428	205	NC_006088.5:142505620-142505823	aUCE.0164
NW_009270501.1:1679053-1679519	467	NC_006088.5:142518055-142518516	aUCE.0165
NW_009270501.1:1677318-1677651	334	NC_006088.5:142519825-142520157	aUCE.0166
NW_009270501.1:1650316-1650518	203	NC_006088.5:142546883-142547082	aUCE.0167
NW_009270501.1:1475820-1476037	218	NC_006088.5:142731722-142731938	aUCE.0168
NW_009270501.1:972714-973067	354	NC_006088.5:143223129-143223478	aUCE.0169
NW_009270501.1:555683-555891	209	NC_006088.5:143561910-143562112	aUCE.0170
NW_009270525.1:2864912-2865252	341	NC_006088.5:14364767-14365108	aUCE.0171
NW_009271518.1:1004833-1005067	235	NC_006088.5:145436149-145436382	aUCE.0172
NW_009271518.1:973785-974120	336	NC_006088.5:145465972-145466306	aUCE.0173
NW_009271518.1:895362-895635	274	NC_006088.5:145531438-145531710	aUCE.0174
NW_009271518.1:813497-813870	374	NC_006088.5:145604757-145605129	aUCE.0175
NW_009271518.1:811970-812209	240	NC_006088.5:145606427-145606665	aUCE.0176
NW_009271518.1:583386-583660	275	NC_006088.5:145790058-145790331	aUCE.0177
NW_009271518.1:551451-551681	231	NC_006088.5:145815783-145816012	aUCE.0178
NW_009271518.1:519604-519867	264	NC_006088.5:145845492-145845754	aUCE.0179
NW_009271518.1:469081-469294	214	NC_006088.5:145887538-145887750	aUCE.0180
NW_009271518.1:464329-464594	266	NC_006088.5:145891906-145892170	aUCE.0181
NW_009270410.1:293733-293971	239	NC_006088.5:146302893-146303127	aUCE.0182
NW_009270575.1:2161463-2161683	221	NC_006088.5:146626203-146626422	aUCE.0183
NW_009270575.1:1984454-1984660	207	NC_006088.5:146787512-146787717	aUCE.0184
NW_009270525.1:2475094-2475316	223	NC_006088.5:14689198-14689419	aUCE.0185
NW_009270575.1:919523-919856	334	NC_006088.5:147739074-147739406	aUCE.0186
NW_009270575.1:894552-894932	381	NC_006088.5:147763081-147763460	aUCE.0187
NW_009270575.1:879896-880158	263	NC_006088.5:147774314-147774575	aUCE.0188
NW_009270575.1:871670-871939	270	NC_006088.5:147782962-147783230	aUCE.0189
NW_009270575.1:864339-864752	414	NC_006088.5:147790007-147790419	aUCE.0190
NW_009270575.1:812797-813299	503	NC_006088.5:147839545-147840041	aUCE.0191
NW_009270575.1:812550-812795	246	NC_006088.5:147840044-147840288	aUCE.0192
NW_009270575.1:801785-802037	253	NC_006088.5:147848065-147848310	aUCE.0193
NW_009270575.1:800144-800928	785	NC_006088.5:147849082-147849844	aUCE.0194
NW_009270575.1:791205-791530	326	NC_006088.5:147856708-147857026	aUCE.0195
NW_009270575.1:774186-774443	258	NC_006088.5:147874115-147874371	aUCE.0196
NW_009271580.1:220483-220742	260	NC_006088.5:152611385-152611643	aUCE.0197
NW_009270771.1:95571-95887	317	NC_006088.5:154054473-154054784	aUCE.0198
NW_009270771.1:91769-91973	205	NC_006088.5:154058266-154058462	aUCE.0199
NW_009270771.1:89738-90065	328	NC_006088.5:154060141-154060467	aUCE.0200
NW_009270771.1:89468-89736	269	NC_006088.5:154060470-154060736	aUCE.0201
NW_009270771.1:67582-67835	254	NC_006088.5:154082384-154082634	aUCE.0202
NW_009270771.1:54661-54876	216	NC_006088.5:154094667-154094876	aUCE.0203
NW_009270771.1:25321-25597	277	NC_006088.5:154123306-154123581	aUCE.0204
NW_009271906.1:830895-831336	442	NC_006088.5:154379345-154379783	aUCE.0205
NW_009271906.1:671574-671809	236	NC_006088.5:154532763-154532997	aUCE.0206
NW_009271906.1:573925-574206	282	NC_006088.5:154632887-154633167	aUCE.0207
NW_009271906.1:535128-535569	442	NC_006088.5:154666252-154666690	aUCE.0208
NW_009271906.1:497396-497629	234	NC_006088.5:154700707-154700939	aUCE.0209
NW_009271906.1:469728-470082	355	NC_006088.5:154727508-154727861	aUCE.0210
NW_009271906.1:433309-433621	313	NC_006088.5:154769499-154769806	aUCE.0211
NW_009271906.1:408556-408834	279	NC_006088.5:154792207-154792484	aUCE.0212
NW_009271906.1:393554-393801	248	NC_006088.5:154804632-154804878	aUCE.0213
NW_009271906.1:384127-384380	254	NC_006088.5:154813917-154814169	aUCE.0214
NW_009271906.1:383744-384073	330	NC_006088.5:154814224-154814550	aUCE.0215
NW_009271906.1:306738-306997	260	NC_006088.5:154904414-154904669	aUCE.0216
NW_009271906.1:301411-301618	208	NC_006088.5:154908331-154908518 (Blat hit)	aUCE.0217
NW_009271906.1:288843-289162	320	NC_006088.5:154919862-154920180	aUCE.0218
NW_009271906.1:281964-282183	220	NC_006088.5:154925929-154926147	aUCE.0219
NW_009271906.1:206530-206775	246	NC_006088.5:154999695-154999931	aUCE.0220
NW_009271906.1:165517-165757	241	NC_006088.5:155043519-155043758	aUCE.0221
NW_009271906.1:154245-154579	335	NC_006088.5:155055881-155056214	aUCE.0222
NW_009271906.1:147971-148203	233	NC_006088.5:155062599-155062830	aUCE.0223
NW_009271906.1:108758-108995	238	NC_006088.5:155099612-155099848	aUCE.0224
NW_009271906.1:106745-107011	267	NC_006088.5:155101516-155101781	aUCE.0225
NW_009271906.1:105491-105808	318	NC_006088.5:155102684-155103000	aUCE.0226
NW_009271906.1:105156-105488	333	NC_006088.5:155103005-155103335	aUCE.0227
NW_009271520.1:147593-147850	258	NC_006088.5:155742630-155742881	aUCE.0228
NW_009271520.1:1489611-1489818	208	NC_006088.5:157153744-157153950	aUCE.0229
NW_009271520.1:1697545-1697884	340	NC_006088.5:157358101-157358438	aUCE.0230
NW_009271520.1:2014368-2014606	239	NC_006088.5:157664207-157664444	aUCE.0231
NW_009271520.1:2033887-2034228	342	NC_006088.5:157685575-157685915	aUCE.0232
NW_009271520.1:2092414-2092712	299	NC_006088.5:157751595-157751884	aUCE.0233
NW_009271520.1:2171805-2172056	252	NC_006088.5:157839986-157840233	aUCE.0234
NW_009271520.1:2200344-2200583	240	NC_006088.5:157868344-157868576	aUCE.0235
NW_009271520.1:2234168-2234652	485	NC_006088.5:157898715-157899197	aUCE.0236
NW_009271520.1:2253810-2254148	339	NC_006088.5:157919269-157919605	aUCE.0237
NW_009271520.1:2273865-2274178	314	NC_006088.5:157937865-157938177	aUCE.0238
NW_009271520.1:2276213-2276425	213	NC_006088.5:157940298-157940509	aUCE.0239
NW_009271520.1:2304453-2304740	288	NC_006088.5:157974346-157974632	aUCE.0240
NW_009271520.1:2383659-2384114	456	NC_006088.5:158052860-158053314	aUCE.0241
NW_009271520.1:2430527-2430748	222	NC_006088.5:158099985-158100205	aUCE.0242
NW_009271520.1:2430771-2431410	640	NC_006088.5:158100229-158100865	aUCE.0243
NW_009271520.1:2447070-2447320	251	NC_006088.5:158115280-158115530	aUCE.0244
NW_009271520.1:2456054-2456279	226	NC_006088.5:158123790-158124014	aUCE.0245
NW_009271520.1:2461161-2461385	225	NC_006088.5:158127765-158127987	aUCE.0246
NW_009271520.1:2461751-2461996	246	NC_006088.5:158128352-158128594	aUCE.0247
NW_009271520.1:2467066-2467305	240	NC_006088.5:158133462-158133700	aUCE.0248
NW_009271520.1:2474809-2475110	302	NC_006088.5:158140433-158140730	aUCE.0249
NW_009271520.1:2497872-2498230	359	NC_006088.5:158168707-158169064	aUCE.0250
NW_009271520.1:2501474-2501789	316	NC_006088.5:158172142-158172454	aUCE.0251
NW_009271520.1:2542686-2542981	296	NC_006088.5:158212914-158213208	aUCE.0252
NW_009271520.1:2563338-2563733	396	NC_006088.5:158234315-158234709	aUCE.0253
NW_009271520.1:2601922-2602149	228	NC_006088.5:158269985-158270211	aUCE.0254
NW_009271520.1:2608751-2609001	251	NC_006088.5:158277880-158278129	aUCE.0255
NW_009271520.1:2638636-2639572	937	NC_006088.5:158306106-158307040	aUCE.0256
NW_009271520.1:2662519-2663175	657	NC_006088.5:158329744-158330398	aUCE.0257
NW_009271520.1:2665690-2665999	310	NC_006088.5:158333386-158333691	aUCE.0258
NW_009271520.1:2682476-2682701	226	NC_006088.5:158347837-158348060	aUCE.0259
NW_009271520.1:2689121-2689479	359	NC_006088.5:158360625-158360957	aUCE.0260
NW_009271520.1:2713271-2713508	238	NC_006088.5:158384355-158384591	aUCE.0261
NW_009271520.1:2732454-2732830	377	NC_006088.5:158405704-158406079	aUCE.0262
NW_009271520.1:2732844-2733201	358	NC_006088.5:158406094-158406449	aUCE.0263
NW_009271520.1:2770449-2770698	250	NC_006088.5:158442407-158442655	aUCE.0264
NW_009271520.1:2808160-2808444	285	NC_006088.5:158482883-158483166	aUCE.0265
NW_009271520.1:2870526-2870972	447	NC_006088.5:158549711-158550156	aUCE.0266
NW_009271520.1:2901301-2901575	275	NC_006088.5:158573699-158573964	aUCE.0267
NW_009271520.1:2945805-2946183	379	NC_006088.5:158620183-158620559	aUCE.0268
NW_009271520.1:2946307-2946540	234	NC_006088.5:158620672-158620902	aUCE.0269
NW_009271520.1:3033624-3034302	679	NC_006088.5:158728981-158729656	aUCE.0270
NW_009271520.1:3121635-3121988	354	NC_006088.5:158826989-158827341	aUCE.0271
NW_009271592.1:320687-320954	268	NC_006088.5:160447114-160447380	aUCE.0272
NW_009271592.1:718448-718688	241	NC_006088.5:160853673-160853910	aUCE.0273
NW_009271592.1:1002440-1002642	203	NC_006088.5:161140291-161140489	aUCE.0274
NW_009271592.1:1009262-1009487	226	NC_006088.5:161148863-161149085	aUCE.0275
NW_009270951.1:3867147-3867490	344	NC_006088.5:164780691-164781030	aUCE.0276
NW_009270951.1:3806865-3807100	236	NC_006088.5:164835086-164835320	aUCE.0277
NW_009270951.1:2639888-2640209	322	NC_006088.5:165958440-165958759	aUCE.0278
NW_009270951.1:2140072-2140297	226	NC_006088.5:166424178-166424402	aUCE.0279
NW_009270951.1:1841013-1841260	248	NC_006088.5:166732233-166732479	aUCE.0280
NW_009270951.1:1546658-1546896	239	NC_006088.5:167029964-167030198	aUCE.0281
NW_009270951.1:825078-825344	267	NC_006088.5:167657463-167657728	aUCE.0282
NW_009270951.1:769019-769368	350	NC_006088.5:167709172-167709520	aUCE.0283
NW_009270951.1:223623-223833	211	NC_006088.5:168215301-168215510	aUCE.0284
NW_009271497.1:3133282-3133487	206	NC_006088.5:170169257-170169461	aUCE.0285
NW_009271497.1:2629713-2629942	230	NC_006088.5:170597184-170597412	aUCE.0286
NW_009271497.1:2629098-2629449	352	NC_006088.5:170597678-170598026	aUCE.0287
NW_009271497.1:2628881-2629096	216	NC_006088.5:170598031-170598244	aUCE.0288
NW_009271497.1:2628327-2628579	253	NC_006088.5:170598536-170598787	aUCE.0289
NW_009271497.1:2628102-2628322	221	NC_006088.5:170598793-170599012	aUCE.0290
NW_009271497.1:2627638-2627844	207	NC_006088.5:170599273-170599468	aUCE.0291
NW_009271497.1:2616278-2616512	235	NC_006088.5:170611913-170612146	aUCE.0292
NW_009271497.1:2319300-2319529	230	NC_006088.5:170884250-170884476	aUCE.0293
NW_009271497.1:2240524-2240807	284	NC_006088.5:170963897-170964179	aUCE.0294
NW_009271497.1:2100788-2101045	258	NC_006088.5:171099424-171099680	aUCE.0295
NW_009271508.1:560030-560312	283	NC_006088.5:1711363-1711638	aUCE.0296
NW_009271497.1:1949500-1949806	307	NC_006088.5:171271776-171272081	aUCE.0297
NW_009271497.1:1092688-1092932	245	NC_006088.5:172054317-172054557	aUCE.0298
NW_009270374.1:460252-460467	216	NC_006088.5:17315621-17315832	aUCE.0299
NW_009270374.1:357392-357671	280	NC_006088.5:17419907-17420185	aUCE.0300
NW_009272086.1:1305499-1305706	208	NC_006088.5:174268422-174268629	aUCE.0301
NW_009272086.1:1354194-1354536	343	NC_006088.5:174315507-174315849	aUCE.0302
NW_009272086.1:1552103-1552369	267	NC_006088.5:174497731-174497996	aUCE.0303
NW_009272086.1:1557956-1558179	224	NC_006088.5:174503575-174503794	aUCE.0304
NW_009272086.1:1558203-1558507	305	NC_006088.5:174503846-174504149	aUCE.0305
NW_009272086.1:1566956-1567188	233	NC_006088.5:174511622-174511851	aUCE.0306
NW_009272086.1:1578277-1578785	509	NC_006088.5:174522149-174522642	aUCE.0307
NW_009272086.1:1613460-1613664	205	NC_006088.5:174556395-174556595	aUCE.0308
NW_009272086.1:1638265-1638510	246	NC_006088.5:174582695-174582940	aUCE.0309
NW_009272086.1:1746435-1746671	237	NC_006088.5:174676119-174676352	aUCE.0310
NW_009272086.1:1761283-1761488	206	NC_006088.5:174692923-174693119	aUCE.0311
NW_009270374.1:273693-273910	218	NC_006088.5:17500482-17500693	aUCE.0312
NW_009272086.1:3860660-3860880	221	NC_006088.5:176499427-176499639	aUCE.0313
NW_009272086.1:4743380-4743592	213	NC_006088.5:177211758-177211969	aUCE.0314
NW_009272086.1:4809885-4810165	281	NC_006088.5:177272655-177272934	aUCE.0315
NW_009272086.1:4810268-4810507	240	NC_006088.5:177273038-177273277	aUCE.0316
NW_009272086.1:4810935-4811646	712	NC_006088.5:177273683-177274394	aUCE.0317
NW_009272086.1:4954920-4955150	231	NC_006088.5:177392783-177393011	aUCE.0318
NW_009272086.1:4962442-4962699	258	NC_006088.5:177397409-177397605	aUCE.0319
NW_009272086.1:5023874-5024991	1118	NC_006088.5:177431681-177432796	aUCE.0320
NW_009270374.1:19017-19314	298	NC_006088.5:17765464-17765760	aUCE.0321
NW_009272086.1:7626515-7626822	308	NC_006088.5:179687398-179687704	aUCE.0322
NW_009272086.1:8116254-8116467	214	NC_006088.5:180101891-180102103	aUCE.0323
NW_009272086.1:8495929-8496157	229	NC_006088.5:180400086-180400313	aUCE.0324
NW_009271890.1:2183826-2184057	232	NC_006088.5:180521089-180521317	aUCE.0325
NW_009271470.1:1050267-1050582	316	NC_006088.5:182507412-182507726	aUCE.0326
NW_009271131.1:61948-62305	358	NC_006088.5:184051876-184052225	aUCE.0327
NW_009270419.1:175687-175971	285	NC_006088.5:186293202-186293485	aUCE.0328
NW_009270419.1:359451-359749	299	NC_006088.5:186459691-186459988	aUCE.0329
NW_009270419.1:617180-617388	209	NC_006088.5:186687490-186687695	aUCE.0330
NW_009276911.1:1920651-1920860	210	NC_006088.5:187763927-187764135	aUCE.0331
NW_009276911.1:1911335-1911578	244	NC_006088.5:187773042-187773284	aUCE.0332
NW_009270640.1:1364583-1364796	214	NC_006088.5:18927209-18927419	aUCE.0333
NW_009270640.1:1391842-1392378	537	NC_006088.5:18955840-18956375	aUCE.0334
NW_009270380.1:185825-186108	284	NC_006088.5:190014579-190014861	aUCE.0335
NW_009271621.1:216833-217085	253	NC_006088.5:190284859-190285103	aUCE.0336
NW_009271621.1:200894-201108	215	NC_006088.5:190296579-190296790	aUCE.0337
NW_009271621.1:57814-58064	251	NC_006088.5:190414829-190415078	aUCE.0338
NW_009271013.1:81482-81721	240	NC_006088.5:190562321-190562559	aUCE.0339
NW_009271013.1:184554-184757	204	NC_006088.5:190659392-190659594	aUCE.0340
NW_009271013.1:327469-327682	214	NC_006088.5:190799878-190800076	aUCE.0341
NW_009271899.1:129334-129542	209	NC_006088.5:191167417-191167625	aUCE.0342
NW_009271296.1:86599-86833	235	NC_006088.5:191381877-191382110	aUCE.0343
NW_009271009.1:2221656-2221856	201	NC_006088.5:192038837-192039036	aUCE.0344
NW_009271009.1:1810872-1811145	274	NC_006088.5:192411146-192411415	aUCE.0345
NW_009270640.1:1811944-1812150	207	NC_006088.5:19334971-19335176	aUCE.0346
NW_009276901.1:367962-368237	276	NC_006088.5:194617786-194618060	aUCE.0347
NW_009276901.1:964547-964783	237	NC_006088.5:195127440-195127675	aUCE.0348
NW_009276901.1:972619-972842	224	NC_006088.5:195134591-195134812	aUCE.0349
NW_009276901.1:987493-987810	318	NC_006088.5:195149156-195149469	aUCE.0350
NW_009276901.1:991676-991913	238	NC_006088.5:195153477-195153625	aUCE.0351
NW_009276901.1:1184692-1184956	265	NC_006088.5:195326365-195326628	aUCE.0352
NW_009276901.1:1271651-1271878	228	NC_006088.5:195416468-195416695	aUCE.0353
NW_009270640.1:2243653-2243876	224	NC_006088.5:19706146-19706367	aUCE.0354
NW_009272084.1:1190585-1190792	208	NC_006088.5:19985639-19985845	aUCE.0355
NW_009272084.1:1982464-1982687	224	NC_006088.5:20648248-20648470	aUCE.0356
NW_009272138.1:1876099-1876358	260	NC_006088.5:22867516-22867774	aUCE.0357
NW_009272138.1:1778261-1778601	341	NC_006088.5:22963664-22964003	aUCE.0358
NW_009272138.1:1760835-1761071	237	NC_006088.5:22978667-22978898	aUCE.0359
NW_009272138.1:1760511-1760715	205	NC_006088.5:22979113-22979312	aUCE.0360
NW_009272138.1:1654518-1654755	238	NC_006088.5:23059713-23059949	aUCE.0361
NW_009270310.1:275296-275536	241	NC_006088.5:24659612-24659848	aUCE.0362
NW_009270310.1:500002-500223	222	NC_006088.5:24845352-24845572	aUCE.0363
NW_009270310.1:549736-550119	384	NC_006088.5:24877196-24877577	aUCE.0364
NW_009270310.1:1111496-1112013	518	NC_006088.5:25388963-25389479	aUCE.0365
NW_009270310.1:1155450-1155769	320	NC_006088.5:25425009-25425325	aUCE.0366
NW_009270310.1:1222705-1223285	581	NC_006088.5:25490385-25490961	aUCE.0367
NW_009270310.1:1241771-1242013	243	NC_006088.5:25507969-25508207	aUCE.0368
NW_009270310.1:1277814-1278110	297	NC_006088.5:25539542-25539837	aUCE.0369
NW_009270310.1:1320426-1320689	264	NC_006088.5:25580450-25580711	aUCE.0370
NW_009270310.1:1324228-1324651	424	NC_006088.5:25584437-25584859	aUCE.0371
NW_009270310.1:1328005-1328304	300	NC_006088.5:25587499-25587797	aUCE.0372
NW_009270310.1:1336886-1337127	242	NC_006088.5:25597038-25597273	aUCE.0373
NW_009270310.1:1366429-1366639	211	NC_006088.5:25621594-25621802	aUCE.0374
NW_009270310.1:1366897-1367478	582	NC_006088.5:25622062-25622642	aUCE.0375
NW_009270310.1:1368423-1368752	330	NC_006088.5:25623570-25623898	aUCE.0376
NW_009270310.1:1408681-1408920	240	NC_006088.5:25664708-25664943	aUCE.0377
NW_009270310.1:1429283-1429488	206	NC_006088.5:25685467-25685671	aUCE.0378
NW_009270310.1:1432495-1432700	206	NC_006088.5:25688398-25688600	aUCE.0379
NW_009270310.1:1440587-1440811	225	NC_006088.5:25696360-25696583	aUCE.0380
NW_009270310.1:1440839-1441168	330	NC_006088.5:25696649-25696976	aUCE.0381
NW_009270310.1:1454260-1454690	431	NC_006088.5:25709217-25709639	aUCE.0382
NW_009270310.1:1455324-1455689	366	NC_006088.5:25710268-25710628	aUCE.0383
NW_009270310.1:1456623-1456867	245	NC_006088.5:25711562-25711799	aUCE.0384
NW_009270310.1:1490563-1490962	400	NC_006088.5:25741805-25742203	aUCE.0385
NW_009271508.1:1459227-1459492	266	NC_006088.5:2577116-2577380	aUCE.0386
NW_009270310.1:1560744-1561230	487	NC_006088.5:25813730-25814215	aUCE.0387
NW_009270310.1:1593557-1593840	284	NC_006088.5:25845349-25845631	aUCE.0388
NW_009270310.1:1600353-1600709	357	NC_006088.5:25851205-25851560	aUCE.0389
NW_009270310.1:1619642-1620018	377	NC_006088.5:25870972-25871347	aUCE.0390
NW_009270310.1:1654503-1654728	226	NC_006088.5:25902203-25902427	aUCE.0391
NW_009270310.1:1679782-1680103	322	NC_006088.5:25925067-25925379	aUCE.0392
NW_009270310.1:1743658-1743970	313	NC_006088.5:25984568-25984879	aUCE.0393
NW_009270310.1:1769188-1769429	242	NC_006088.5:26008992-26009232	aUCE.0394
NW_009270310.1:1778472-1778858	387	NC_006088.5:26018380-26018765	aUCE.0395
NW_009270310.1:1811084-1811430	347	NC_006088.5:26048379-26048725	aUCE.0396
NW_009270310.1:1839360-1839631	272	NC_006088.5:26077512-26077782	aUCE.0397
NW_009270310.1:1840171-1840476	306	NC_006088.5:26078313-26078617	aUCE.0398
NW_009270310.1:1847285-1847498	214	NC_006088.5:26085447-26085647	aUCE.0399
NW_009270310.1:1847699-1848111	413	NC_006088.5:26085857-26086265	aUCE.0400
NW_009270310.1:1848113-1848333	221	NC_006088.5:26086268-26086486	aUCE.0401
NW_009270310.1:1848345-1848698	354	NC_006088.5:26086499-26086851	aUCE.0402
NW_009270310.1:1849827-1850074	248	NC_006088.5:26087975-26088221	aUCE.0403
NW_009270310.1:1859083-1859289	207	NC_006088.5:26096480-26096685	aUCE.0404
NW_009270310.1:1859977-1860357	381	NC_006088.5:26097375-26097754	aUCE.0405
NW_009270310.1:1866234-1866487	254	NC_006088.5:26103175-26103421	aUCE.0406
NW_009270310.1:1874512-1874902	391	NC_006088.5:26111907-26112294	aUCE.0407
NW_009270310.1:1876034-1876278	245	NC_006088.5:26113420-26113663	aUCE.0408
NW_009270310.1:1880974-1881306	333	NC_006088.5:26117989-26118320	aUCE.0409
NW_009270310.1:1882773-1883029	257	NC_006088.5:26119784-26120039	aUCE.0410
NW_009270310.1:1917360-1917577	218	NC_006088.5:26152219-26152433	aUCE.0411
NW_009270310.1:1940803-1941198	396	NC_006088.5:26173656-26174047	aUCE.0412
NW_009270310.1:1941719-1941952	234	NC_006088.5:26174526-26174757	aUCE.0413
NW_009270310.1:1944321-1944707	387	NC_006088.5:26177092-26177477	aUCE.0414
NW_009270310.1:1967673-1968215	543	NC_006088.5:26199598-26200139	aUCE.0415
NW_009270310.1:1969488-1969771	284	NC_006088.5:26201920-26202201	aUCE.0416
NW_009270310.1:2001892-2002292	401	NC_006088.5:26231955-26232354	aUCE.0417
NW_009270310.1:2002538-2002935	398	NC_006088.5:26232601-26232997	aUCE.0418
NW_009270310.1:2013521-2013960	440	NC_006088.5:26242934-26243356	aUCE.0419
NW_009270310.1:2018524-2019006	483	NC_006088.5:26247669-26248150	aUCE.0420
NW_009270310.1:2019271-2020098	828	NC_006088.5:26248415-26249241	aUCE.0421
NW_009270310.1:2020595-2021037	443	NC_006088.5:26249781-26250220	aUCE.0422
NW_009270310.1:2021630-2022145	516	NC_006088.5:26250832-26251346	aUCE.0423
NW_009270310.1:2040461-2040759	299	NC_006088.5:26268756-26269053	aUCE.0424
NW_009270310.1:2090301-2090740	440	NC_006088.5:26306592-26307031	aUCE.0425
NW_009270310.1:2378022-2378249	228	NC_006088.5:26565903-26566133	aUCE.0426
NW_009270310.1:2407756-2408059	304	NC_006088.5:26589868-26590170	aUCE.0427
NW_009270310.1:2417229-2417592	364	NC_006088.5:26600667-26601029	aUCE.0428
NW_009270310.1:2647721-2647974	254	NC_006088.5:26819791-26820041	aUCE.0429
NW_009276913.1:2122431-2122686	256	NC_006088.5:29272445-29272699	aUCE.0430
NW_009276913.1:1974562-1974834	273	NC_006088.5:29419831-29420102	aUCE.0431
NW_009276913.1:1964533-1964786	254	NC_006088.5:29428953-29429204	aUCE.0432
NW_009276913.1:230003-230406	404	NC_006088.5:30954413-30954812	aUCE.0433
NW_009276913.1:206070-206309	240	NC_006088.5:30978658-30978896	aUCE.0434
NW_009271918.1:372714-372922	209	NC_006088.5:33174337-33174540	aUCE.0435
NW_009270923.1:1672233-1672518	286	NC_006088.5:34136423-34136702	aUCE.0436
NW_009270923.1:1670576-1670790	215	NC_006088.5:34138197-34138407	aUCE.0437
NW_009270923.1:1569508-1569764	257	NC_006088.5:34226595-34226850	aUCE.0438
NW_009270923.1:256435-256745	311	NC_006088.5:35362084-35362393	aUCE.0439
NW_009270769.1:6466600-6467155	556	NC_006088.5:35931024-35931567	aUCE.0440
NW_009270769.1:5976793-5977096	304	NC_006088.5:36367041-36367339	aUCE.0441
NW_009270769.1:5898215-5898526	312	NC_006088.5:36438661-36438970	aUCE.0442
NW_009270769.1:5030236-5030507	272	NC_006088.5:37254562-37254832	aUCE.0443
NW_009270769.1:4522065-4522365	301	NC_006088.5:37718538-37718833	aUCE.0444
NW_009271575.1:941614-941851	238	NC_006088.5:3811111-3811347	aUCE.0445
NW_009270769.1:3260405-3260617	213	NC_006088.5:38771337-38771550	aUCE.0446
NW_009270769.1:3065362-3065569	208	NC_006088.5:38952490-38952696	aUCE.0447
NW_009270769.1:3030117-3030358	242	NC_006088.5:38983219-38983447	aUCE.0448
NW_009270769.1:3003859-3004097	239	NC_006088.5:39004856-39005093	aUCE.0449
NW_009270769.1:3002315-3002618	304	NC_006088.5:39006366-39006668	aUCE.0450
NW_009270769.1:2442283-2442687	405	NC_006088.5:39536218-39536621	aUCE.0451
NW_009270769.1:2312526-2312859	334	NC_006088.5:39645444-39645773	aUCE.0452
NW_009270769.1:1938278-1938511	234	NC_006088.5:39981763-39981995	aUCE.0453
NW_009270769.1:1866780-1867003	224	NC_006088.5:40045260-40045481	aUCE.0454
NW_009270769.1:1819148-1819410	263	NC_006088.5:40080271-40080534	aUCE.0455
NW_009270769.1:1524749-1525017	269	NC_006088.5:40332136-40332403	aUCE.0456
NW_009270769.1:739237-739445	209	NC_006088.5:41037674-41037881	aUCE.0457
NW_009271136.1:5707940-5708505	566	NC_006088.5:41924543-41925107	aUCE.0458
NW_009271136.1:5645694-5645901	208	NC_006088.5:41980561-41980769	aUCE.0459
NW_009271136.1:5643716-5643969	254	NC_006088.5:41983656-41983908	aUCE.0460
NW_009271136.1:4909734-4910000	267	NC_006088.5:42545719-42545984	aUCE.0461
NW_009271136.1:3878669-3878934	266	NC_006088.5:43431316-43431580	aUCE.0462
NW_009271136.1:3178781-3179089	309	NC_006088.5:44089707-44090012	aUCE.0463
NW_009271136.1:2809189-2809641	453	NC_006088.5:44429277-44429727	aUCE.0464
NW_009271136.1:2294529-2294756	228	NC_006088.5:44876983-44877205	aUCE.0465
NW_009271136.1:1324146-1324357	212	NC_006088.5:45688742-45688952	aUCE.0466
NW_009271575.1:96653-97104	452	NC_006088.5:4582078-4582528	aUCE.0467
NW_009271136.1:695094-695396	303	NC_006088.5:46255738-46256038	aUCE.0468
NW_009271136.1:686890-687189	300	NC_006088.5:46263638-46263936	aUCE.0469
NW_009271136.1:686607-686849	243	NC_006088.5:46263977-46264218	aUCE.0470
NW_009271136.1:632460-632811	352	NC_006088.5:46315972-46316322	aUCE.0471
NW_009271136.1:614452-614673	222	NC_006088.5:46333811-46334030	aUCE.0472
NW_009271136.1:570059-570266	208	NC_006088.5:46380183-46380387	aUCE.0473
NW_009271136.1:569630-569911	282	NC_006088.5:46380535-46380815	aUCE.0474
NW_009271136.1:558295-558551	257	NC_006088.5:46392094-46392347	aUCE.0475
NW_009271136.1:541974-542346	373	NC_006088.5:46408652-46409013	aUCE.0476
NW_009271136.1:436093-436474	382	NC_006088.5:46513842-46514222	aUCE.0477
NW_009271136.1:165252-165487	236	NC_006088.5:46756063-46756297	aUCE.0478
NW_009271395.1:1487405-1487623	219	NC_006088.5:46950739-46950953	aUCE.0479
NW_009271395.1:474934-475147	214	NC_006088.5:47824619-47824832	aUCE.0480
NW_009270488.1:3462046-3462320	275	NC_006088.5:48635562-48635826	aUCE.0481
NW_009270488.1:3374362-3374617	256	NC_006088.5:48715664-48715918	aUCE.0482
NW_009271360.1:232570-232778	209	NC_006088.5:4907719-4907921	aUCE.0483
NW_009271360.1:238474-238910	437	NC_006088.5:4913254-4913689	aUCE.0484
NW_009270488.1:2721836-2722068	233	NC_006088.5:49320021-49320252	aUCE.0485
NW_009270488.1:2686161-2686450	290	NC_006088.5:49352776-49353064	aUCE.0486
NW_009271360.1:283701-284021	321	NC_006088.5:4957357-4957675	aUCE.0487
NW_009270488.1:2048450-2048694	245	NC_006088.5:49779384-49779633	aUCE.0488
NW_009270488.1:2047470-2047695	226	NC_006088.5:49780449-49780673	aUCE.0489
NW_009271780.1:2316670-2316891	222	NC_006088.5:4987783-4987993	aUCE.0490
NW_009271780.1:2291519-2291752	234	NC_006088.5:5010777-5011006	aUCE.0491
NW_009270488.1:1631021-1631226	206	NC_006088.5:50110953-50111158	aUCE.0492
NW_009270488.1:1621520-1621853	334	NC_006088.5:50119804-50120136	aUCE.0493
NW_009270488.1:1621293-1621518	226	NC_006088.5:50120139-50120363	aUCE.0494
NW_009270488.1:1577781-1578140	360	NC_006088.5:50158287-50158645	aUCE.0495
NW_009271780.1:2267469-2267705	237	NC_006088.5:5034022-5034257	aUCE.0496
NW_009270488.1:1282071-1282286	216	NC_006088.5:50420012-50420225	aUCE.0497
NW_009271780.1:2217167-2217368	202	NC_006088.5:5082945-5083143	aUCE.0498
NW_009270488.1:87444-87674	231	NC_006088.5:51279166-51279392	aUCE.0499
NW_009270488.1:35182-35392	211	NC_006088.5:51324372-51324582	aUCE.0500
NW_009271908.1:312635-312958	324	NC_006088.5:51652227-51652546	aUCE.0501
NW_009271908.1:689461-689901	441	NC_006088.5:51967281-51967719	aUCE.0502
NW_009271908.1:701174-701378	205	NC_006088.5:51978616-51978819	aUCE.0503
NW_009271908.1:704570-704803	234	NC_006088.5:51982014-51982246	aUCE.0504
NW_009271908.1:707271-707533	263	NC_006088.5:51984583-51984840	aUCE.0505
NW_009271908.1:712015-712246	232	NC_006088.5:51989426-51989653	aUCE.0506
NW_009271908.1:2596076-2596287	212	NC_006088.5:53664420-53664629	aUCE.0507
NW_009271515.1:10292393-10292604	212	NC_006088.5:53709369-53709576	aUCE.0508
NW_009271515.1:10233567-10233870	304	NC_006088.5:53764527-53764828	aUCE.0509
NW_009271515.1:10154538-10154870	333	NC_006088.5:53827868-53828194	aUCE.0510
NW_009271515.1:10136482-10136690	209	NC_006088.5:53841448-53841655	aUCE.0511
NW_009271515.1:9203392-9203695	304	NC_006088.5:54646016-54646318	aUCE.0512
NW_009271515.1:9182213-9182486	274	NC_006088.5:54663673-54663945	aUCE.0513
NW_009271780.1:1810903-1811291	389	NC_006088.5:5489463-5489846	aUCE.0514
NW_009271515.1:8870376-8870600	225	NC_006088.5:54946222-54946445	aUCE.0515
NW_009271515.1:8855644-8856028	385	NC_006088.5:54957881-54958264	aUCE.0516
NW_009271515.1:8806987-8807221	235	NC_006088.5:54993586-54993819	aUCE.0517
NW_009271515.1:8783248-8783523	276	NC_006088.5:55014816-55015089	aUCE.0518
NW_009271515.1:8740497-8740830	334	NC_006088.5:55054507-55054839	aUCE.0519
NW_009271515.1:8731180-8731522	343	NC_006088.5:55063147-55063486	aUCE.0520
NW_009271515.1:8728957-8729167	211	NC_006088.5:55064586-55064796	aUCE.0521
NW_009271515.1:8721079-8721597	519	NC_006088.5:55072573-55073088	aUCE.0522
NW_009271780.1:1731934-1732253	320	NC_006088.5:5564979-5565294	aUCE.0523
NW_009271515.1:7808939-7809184	246	NC_006088.5:55907523-55907767	aUCE.0524
NW_009271515.1:7558297-7558509	213	NC_006088.5:56140880-56141091	aUCE.0525
NW_009271780.1:1614248-1614550	303	NC_006088.5:5670176-5670477	aUCE.0526
NW_009271515.1:4238532-4238733	202	NC_006088.5:59107588-59107788	aUCE.0527
NW_009271515.1:3639042-3639280	239	NC_006088.5:59610777-59611014	aUCE.0528
NW_009271515.1:3103010-3103259	250	NC_006088.5:60096422-60096670	aUCE.0529
NW_009271515.1:2653323-2653544	222	NC_006088.5:60469055-60469273	aUCE.0530
NW_009271515.1:2592630-2592864	235	NC_006088.5:60524906-60525138	aUCE.0531
NW_009271515.1:2587964-2588176	213	NC_006088.5:60529677-60529887	aUCE.0532
NW_009271515.1:2587752-2587962	211	NC_006088.5:60529890-60530099	aUCE.0533
NW_009271515.1:2327076-2327287	212	NC_006088.5:60765779-60765989	aUCE.0534
NW_009271515.1:2272685-2272911	227	NC_006088.5:60819728-60819952	aUCE.0535
NW_009271515.1:1465214-1465462	249	NC_006088.5:61549295-61549539	aUCE.0536
NW_009271515.1:1411596-1412119	524	NC_006088.5:61599396-61599893	aUCE.0537
NW_009271780.1:1109251-1109458	208	NC_006088.5:6181858-6182064	aUCE.0538
NW_009271515.1:534607-534846	240	NC_006088.5:62359505-62359743	aUCE.0539
NW_009271780.1:1032403-1032692	290	NC_006088.5:6265299-6265584	aUCE.0540
NW_009271515.1:86618-86856	239	NC_006088.5:62832228-62832465	aUCE.0541
NW_009270930.1:2333461-2333700	240	NC_006088.5:63210845-63211083	aUCE.0542
NW_009270930.1:2184166-2184461	296	NC_006088.5:63346520-63346814	aUCE.0543
NW_009270930.1:2183205-2183558	354	NC_006088.5:63347437-63347788	aUCE.0544
NW_009270930.1:2167947-2168161	215	NC_006088.5:63362568-63362779	aUCE.0545
NW_009270930.1:2166313-2166709	397	NC_006088.5:63363908-63364303	aUCE.0546
NW_009270930.1:2133662-2133873	212	NC_006088.5:63397675-63397883	aUCE.0547
NW_009270930.1:2124042-2124386	345	NC_006088.5:63406599-63406942	aUCE.0548
NW_009270930.1:2123266-2123499	234	NC_006088.5:63407507-63407738	aUCE.0549
NW_009270930.1:2121413-2121796	384	NC_006088.5:63409077-63409452	aUCE.0550
NW_009270930.1:2119344-2119751	408	NC_006088.5:63411073-63411476	aUCE.0551
NW_009270930.1:2117332-2117843	512	NC_006088.5:63412951-63413460	aUCE.0552
NW_009270930.1:2116890-2117272	383	NC_006088.5:63413519-63413899	aUCE.0553
NW_009270930.1:1995344-1995545	202	NC_006088.5:63530604-63530804	aUCE.0554
NW_009270930.1:1993919-1994301	383	NC_006088.5:63531909-63532286	aUCE.0555
NW_009270930.1:1873545-1873793	249	NC_006088.5:63659793-63660036	aUCE.0556
NW_009270930.1:1846395-1846684	290	NC_006088.5:63687834-63688122	aUCE.0557
NW_009270930.1:1846020-1846393	374	NC_006088.5:63688125-63688497	aUCE.0558
NW_009270930.1:1769479-1770012	534	NC_006088.5:63768208-63768740	aUCE.0559
NW_009270930.1:1759271-1759533	263	NC_006088.5:63777097-63777358	aUCE.0560
NW_009270930.1:1690821-1691022	202	NC_006088.5:63842848-63843048	aUCE.0561
NW_009270930.1:976291-976569	279	NC_006088.5:64502689-64502966	aUCE.0562
NW_009271780.1:848199-848553	355	NC_006088.5:6458642-6458995	aUCE.0563
NW_009271780.1:797086-797588	503	NC_006088.5:6510384-6510880	aUCE.0564
NW_009271780.1:796344-796686	343	NC_006088.5:6511286-6511625	aUCE.0565
NW_009271780.1:794421-794660	240	NC_006088.5:6513447-6513688	aUCE.0566
NW_009270423.1:44280-44504	225	NC_006088.5:65435828-65436050	aUCE.0567
NW_009270423.1:73085-73371	287	NC_006088.5:65464106-65464391	aUCE.0568
NW_009270423.1:147187-147389	203	NC_006088.5:65539600-65539796	aUCE.0569
NW_009270423.1:204237-204446	210	NC_006088.5:65590978-65591186	aUCE.0570
NW_009270423.1:228927-229158	232	NC_006088.5:65614087-65614314	aUCE.0571
NW_009270423.1:249175-249467	293	NC_006088.5:65633273-65633563	aUCE.0572
NW_009270423.1:311349-311749	401	NC_006088.5:65689129-65689526	aUCE.0573
NW_009270423.1:313098-313408	311	NC_006088.5:65690864-65691173	aUCE.0574
NW_009270423.1:323977-324186	210	NC_006088.5:65701950-65702158	aUCE.0575
NW_009270423.1:381620-381894	275	NC_006088.5:65765099-65765372	aUCE.0576
NW_009270423.1:411512-411757	246	NC_006088.5:65792622-65792866	aUCE.0577
NW_009270423.1:431376-431696	321	NC_006088.5:65811164-65811482	aUCE.0578
NW_009270423.1:439106-439388	283	NC_006088.5:65817872-65818153	aUCE.0579
NW_009270423.1:455970-456336	367	NC_006088.5:65835453-65835818	aUCE.0580
NW_009270423.1:497557-497768	212	NC_006088.5:65884220-65884322	aUCE.0581
NW_009270423.1:535522-536066	545	NC_006088.5:65921304-65921847	aUCE.0582
NW_009270423.1:549361-549606	246	NC_006088.5:65934931-65935165	aUCE.0583
NW_009270423.1:579737-579966	230	NC_006088.5:65965879-65966107	aUCE.0584
NW_009270423.1:585453-585683	231	NC_006088.5:65971328-65971555	aUCE.0585
NW_009270423.1:656956-657311	356	NC_006088.5:66039989-66040340	aUCE.0586
NW_009270423.1:672215-672456	242	NC_006088.5:66054813-66055051	aUCE.0587
NW_009270423.1:683020-683224	205	NC_006088.5:66064841-66065043	aUCE.0588
NW_009270423.1:693022-693236	215	NC_006088.5:66074361-66074575	aUCE.0589
NW_009270423.1:708141-708374	234	NC_006088.5:66089101-66089331	aUCE.0590
NW_009270423.1:715523-715723	201	NC_006088.5:66097218-66097415	aUCE.0591
NW_009270423.1:721765-722012	248	NC_006088.5:66103082-66103328	aUCE.0592
NW_009270423.1:765646-766027	382	NC_006088.5:66145612-66145992	aUCE.0593
NW_009270423.1:768682-768939	258	NC_006088.5:66148617-66148873	aUCE.0594
NW_009270423.1:769063-769306	244	NC_006088.5:66148998-66149240	aUCE.0595
NW_009270423.1:798546-798851	306	NC_006088.5:66177906-66178210	aUCE.0596
NW_009270423.1:850590-850809	220	NC_006088.5:66226125-66226340	aUCE.0597
NW_009270423.1:889207-889699	493	NC_006088.5:66261840-66262328	aUCE.0598
NW_009270423.1:923783-924121	339	NC_006088.5:66295878-66296215	aUCE.0599
NW_009270423.1:958846-959157	312	NC_006088.5:66334582-66334892	aUCE.0600
NW_009270423.1:1010076-1010347	272	NC_006088.5:66404888-66405159	aUCE.0601
NW_009270423.1:1167251-1167465	215	NC_006088.5:66544745-66544957	aUCE.0602
NW_009270423.1:1192452-1192655	204	NC_006088.5:66565347-66565549	aUCE.0603
NW_009271502.1:5182960-5183271	312	NC_006088.5:68419909-68420219	aUCE.0604
NW_009271502.1:4797730-4797931	202	NC_006088.5:68774098-68774294	aUCE.0605
NW_009271502.1:4797235-4797440	206	NC_006088.5:68774597-68774801	aUCE.0606
NW_009271502.1:4754998-4755263	266	NC_006088.5:68812732-68812995	aUCE.0607
NW_009271502.1:4714043-4714250	208	NC_006088.5:68851505-68851711	aUCE.0608
NW_009271502.1:4699092-4699380	289	NC_006088.5:68866009-68866296	aUCE.0609
NW_009271502.1:4692439-4692690	252	NC_006088.5:68872365-68872615	aUCE.0610
NW_009271502.1:4638723-4638932	210	NC_006088.5:68918863-68919071	aUCE.0611
NW_009271502.1:3576538-3576738	201	NC_006088.5:69919486-69919676	aUCE.0612
NW_009271502.1:3576254-3576472	219	NC_006088.5:69919742-69919960	aUCE.0613
NW_009271502.1:3496753-3496995	243	NC_006088.5:69988485-69988726	aUCE.0614
NW_009271502.1:3412193-3412445	253	NC_006088.5:70071472-70071729	aUCE.0615
NW_009271502.1:2782978-2783262	285	NC_006088.5:70610707-70610989	aUCE.0616
NW_009271502.1:2727488-2727708	221	NC_006088.5:70660150-70660368	aUCE.0617
NW_009271502.1:2723483-2723694	212	NC_006088.5:70663797-70664007	aUCE.0618
NW_009271502.1:2543676-2543916	241	NC_006088.5:70835432-70835663	aUCE.0619
NW_009271502.1:2314183-2314431	249	NC_006088.5:71059198-71059445	aUCE.0620
NW_009271502.1:1763985-1764217	233	NC_006088.5:71604515-71604744	aUCE.0621
NW_009271502.1:522817-523156	340	NC_006088.5:72731327-72731665	aUCE.0622
NW_009271203.1:485196-485411	216	NC_006088.5:73473722-73473929	aUCE.0623
NW_009271203.1:932779-933267	489	NC_006088.5:73879055-73879542	aUCE.0624
NW_009271727.1:540676-540904	229	NC_006088.5:75123855-75124080	aUCE.0625
NW_009271951.1:1227691-1227900	210	NC_006088.5:77762043-77762244	aUCE.0626
NW_009271951.1:436351-436581	231	NC_006088.5:79424039-79424268	aUCE.0627
NW_009271951.1:107944-108229	286	NC_006088.5:79723329-79723613	aUCE.0628
NW_009270380.1:1907714-1907943	230	NC_006088.5:80886425-80886650	aUCE.0629
NW_009271190.1:10730724-10730939	216	NC_006088.5:81360690-81360903	aUCE.0630
NW_009271190.1:9568295-9568503	209	NC_006088.5:82415278-82415484	aUCE.0631
NW_009271190.1:9533871-9534283	413	NC_006088.5:82449260-82449669	aUCE.0632
NW_009271190.1:9475736-9476002	267	NC_006088.5:82507823-82508083	aUCE.0633
NW_009271190.1:8913192-8913431	240	NC_006088.5:83021308-83021546	aUCE.0634
NW_009271190.1:8699106-8699322	217	NC_006088.5:83224895-83225110	aUCE.0635
NW_009271190.1:8694354-8694599	246	NC_006088.5:83229498-83229742	aUCE.0636
NW_009271190.1:8661416-8661709	294	NC_006088.5:83260889-83261180	aUCE.0637
NW_009271190.1:8530258-8530492	235	NC_006088.5:83383414-83383648	aUCE.0638
NW_009271190.1:8475265-8475500	236	NC_006088.5:83435953-83436187	aUCE.0639
NW_009271190.1:8434247-8434449	203	NC_006088.5:83474857-83475058	aUCE.0640
NW_009271190.1:8418084-8418488	405	NC_006088.5:83491181-83491569	aUCE.0641
NW_009271190.1:8417655-8417882	228	NC_006088.5:83491772-83491995	aUCE.0642
NW_009271190.1:8381870-8382097	228	NC_006088.5:83525001-83525226	aUCE.0643
NW_009271190.1:8366389-8366796	408	NC_006088.5:83540327-83540731	aUCE.0644
NW_009271190.1:8298368-8298568	201	NC_006088.5:83607203-83607402	aUCE.0645
NW_009271190.1:8210696-8210900	205	NC_006088.5:83692916-83693119	aUCE.0646
NW_009271190.1:8210281-8210484	204	NC_006088.5:83693341-83693543	aUCE.0647
NW_009271190.1:7764924-7765135	212	NC_006088.5:84473129-84473334	aUCE.0648
NW_009271190.1:7297243-7297563	321	NC_006088.5:84899600-84899918	aUCE.0649
NW_009271190.1:7296549-7296838	290	NC_006088.5:84900323-84900611	aUCE.0650
NW_009271190.1:6201736-6202012	277	NC_006088.5:85897810-85898085	aUCE.0651
NW_009271586.1:812149-812383	235	NC_006088.5:8627404-8627637	aUCE.0652
NW_009271586.1:940098-940298	201	NC_006088.5:8745843-8746037	aUCE.0653
NW_009271586.1:1181661-1181867	207	NC_006088.5:8978085-8978290	aUCE.0654
NW_009271190.1:2142499-2142716	218	NC_006088.5:89787013-89787229	aUCE.0655
NW_009271190.1:1845827-1846118	292	NC_006088.5:90059072-90059357	aUCE.0656
NW_009271190.1:1844902-1845114	213	NC_006088.5:90060067-90060268	aUCE.0657
NW_009271190.1:1540631-1540834	204	NC_006088.5:90331380-90331579	aUCE.0658
NW_009271586.1:1409613-1409853	241	NC_006088.5:9186351-9186588	aUCE.0659
NW_009271771.1:2031446-2031661	216	NC_006088.5:92477755-92477966	aUCE.0660
NW_009271771.1:1855010-1855212	203	NC_006088.5:92634257-92634458	aUCE.0661
NW_009271771.1:1341562-1341780	219	NC_006088.5:93067676-93067890	aUCE.0662
NW_009271771.1:1295899-1296124	226	NC_006088.5:93114197-93114421	aUCE.0663
NW_009270218.1:1932513-1932762	250	NC_006088.5:94356829-94357075	aUCE.0664
NW_009270218.1:1852987-1853319	333	NC_006088.5:94438920-94439245	aUCE.0665
NW_009270221.1:368709-368936	228	NC_006088.5:96188233-96188457	aUCE.0666
NW_009270644.1:6124856-6125060	205	NC_006088.5:97107542-97107743	aUCE.0667
NW_009270644.1:5212607-5212840	234	NC_006088.5:97963454-97963682	aUCE.0668
NW_009270644.1:4918113-4918327	215	NC_006088.5:98249027-98249237	aUCE.0669
NW_009270644.1:4879495-4879764	270	NC_006088.5:98287913-98288175	aUCE.0670
NW_009270644.1:4861023-4861262	240	NC_006088.5:98307047-98307285	aUCE.0671
NW_009270644.1:4804634-4804883	250	NC_006088.5:98364314-98364559	aUCE.0672
NW_009270644.1:4493665-4493872	208	NC_006088.5:98665083-98665289	aUCE.0673
NW_009270644.1:4444781-4445108	328	NC_006088.5:98712944-98713264	aUCE.0674
NW_009270644.1:4102281-4102500	220	NC_006088.5:99045302-99045516	aUCE.0675
NW_009270644.1:3921244-3921465	222	NC_006088.5:99212242-99212460	aUCE.0676
NW_009270644.1:3565279-3565494	216	NC_006088.5:99518490-99518702	aUCE.0677
NW_009270644.1:3349970-3350232	263	NC_006088.5:99729495-99729751	aUCE.0678
NW_009270563.1:2369949-2370254	306	NC_006089.5:102414999-102415290	aUCE.0679
NW_009270563.1:2063901-2064132	232	NC_006089.5:102684759-102684989	aUCE.0680
NW_009270563.1:2005817-2006084	268	NC_006089.5:102736980-102737245	aUCE.0681
NW_009270563.1:1927863-1928103	241	NC_006089.5:102807748-102807986	aUCE.0682
NW_009270563.1:1395134-1395348	215	NC_006089.5:103265439-103265652	aUCE.0683
NW_009270563.1:1180008-1180242	235	NC_006089.5:103454717-103454950	aUCE.0684
NW_009270563.1:1179170-1179540	371	NC_006089.5:103455390-103455759	aUCE.0685
NW_009270563.1:1120456-1120747	292	NC_006089.5:103513436-103513725	aUCE.0686
NW_009270563.1:1066258-1066594	337	NC_006089.5:103565180-103565515	aUCE.0687
NW_009270563.1:1055977-1056186	210	NC_006089.5:103576743-103576951	aUCE.0688
NW_009270563.1:1026296-1026608	313	NC_006089.5:103604893-103605205	aUCE.0689
NW_009270563.1:1022328-1022572	245	NC_006089.5:103609047-103609290	aUCE.0690
NW_009270563.1:1007576-1007799	224	NC_006089.5:103623840-103624061	aUCE.0691
NW_009270563.1:993842-994074	233	NC_006089.5:103637633-103637864	aUCE.0692
NW_009270563.1:976599-976826	228	NC_006089.5:103653709-103653928	aUCE.0693
NW_009270563.1:971747-971963	217	NC_006089.5:103658171-103658386	aUCE.0694
NW_009270563.1:939047-939451	405	NC_006089.5:103690445-103690846	aUCE.0695
NW_009270563.1:935744-935963	220	NC_006089.5:103693951-103694169	aUCE.0696
NW_009270563.1:933558-933763	206	NC_006089.5:103696064-103696268	aUCE.0697
NW_009270563.1:932107-932340	234	NC_006089.5:103697476-103697708	aUCE.0698
NW_009270563.1:929035-929314	280	NC_006089.5:103700471-103700750	aUCE.0699
NW_009270563.1:927117-927931	815	NC_006089.5:103701849-103702662	aUCE.0700
NW_009270563.1:913710-913996	287	NC_006089.5:103715399-103715684	aUCE.0701
NW_009270563.1:910406-910652	247	NC_006089.5:103718799-103719044	aUCE.0702
NW_009270563.1:882951-883157	207	NC_006089.5:103745987-103746192	aUCE.0703
NW_009270563.1:868302-868520	219	NC_006089.5:103759911-103760128	aUCE.0704
NW_009270563.1:843286-843496	211	NC_006089.5:103785761-103785969	aUCE.0705
NW_009270563.1:840152-840784	633	NC_006089.5:103788403-103789033	aUCE.0706
NW_009270563.1:839029-839287	259	NC_006089.5:103789892-103790149	aUCE.0707
NW_009270563.1:780467-780723	257	NC_006089.5:103849003-103849258	aUCE.0708
NW_009270563.1:688770-689065	296	NC_006089.5:103933767-103934061	aUCE.0709
NW_009270563.1:679803-680115	313	NC_006089.5:103941778-103942086	aUCE.0710
NW_009270563.1:660369-660660	292	NC_006089.5:103960853-103961143	aUCE.0711
NW_009270563.1:657350-657574	225	NC_006089.5:103964182-103964405	aUCE.0712
NW_009270563.1:633210-633469	260	NC_006089.5:103986196-103986454	aUCE.0713
NW_009270563.1:525239-525452	214	NC_006089.5:104090804-104091014	aUCE.0714
NW_009270563.1:506679-506884	206	NC_006089.5:104108798-104109002	aUCE.0715
NW_009270563.1:317966-318170	205	NC_006089.5:104283009-104283210	aUCE.0716
NW_009270563.1:284929-285135	207	NC_006089.5:104314466-104314669	aUCE.0717
NW_009270563.1:248377-248593	217	NC_006089.5:104347773-104347976	aUCE.0718
NW_009270563.1:228921-229161	241	NC_006089.5:104365811-104366049	aUCE.0719
NW_009270819.1:2818572-2818826	255	NC_006089.5:104577-104830	aUCE.0720
NW_009271783.1:1195799-1196052	254	NC_006089.5:106570147-106570395	aUCE.0721
NW_009271783.1:1217016-1217231	216	NC_006089.5:106589448-106589657	aUCE.0722
NW_009271783.1:1220676-1220907	232	NC_006089.5:106593148-106593378	aUCE.0723
NW_009271783.1:1221984-1222209	226	NC_006089.5:106594453-106594677	aUCE.0724
NW_009271783.1:1222450-1222694	245	NC_006089.5:106594917-106595163	aUCE.0725
NW_009271783.1:1266373-1266614	242	NC_006089.5:106636172-106636413	aUCE.0726
NW_009271783.1:1302897-1303438	542	NC_006089.5:106670720-106671259	aUCE.0727
NW_009271783.1:1313755-1314112	358	NC_006089.5:106681114-106681470	aUCE.0728
NW_009271783.1:1338418-1338665	248	NC_006089.5:106702670-106702915	aUCE.0729
NW_009271783.1:1348694-1349045	352	NC_006089.5:106710083-106710433	aUCE.0730
NW_009271783.1:1381650-1381861	212	NC_006089.5:106737763-106737973	aUCE.0731
NW_009271783.1:1418652-1419172	521	NC_006089.5:106776064-106776583	aUCE.0732
NW_009271783.1:1446108-1446361	254	NC_006089.5:106804009-106804261	aUCE.0733
NW_009271783.1:1448160-1448859	700	NC_006089.5:106805932-106806627	aUCE.0734
NW_009271783.1:1733584-1733849	266	NC_006089.5:107062273-107062535	aUCE.0735
NW_009271783.1:1818955-1819296	342	NC_006089.5:107140869-107141209	aUCE.0736
NW_009271783.1:2381330-2381615	286	NC_006089.5:107654505-107654788	aUCE.0737
NW_009271896.1:3296992-3297200	209	NC_006089.5:10777388-10777594	aUCE.0738
NW_009271896.1:3300176-3300550	375	NC_006089.5:10780549-10780922	aUCE.0739
NW_009271896.1:3322424-3322673	250	NC_006089.5:10803655-10803903	aUCE.0740
NW_009271783.1:2829891-2830122	232	NC_006089.5:108064810-108065039	aUCE.0741
NW_009271783.1:2913589-2913805	217	NC_006089.5:108136912-108137125	aUCE.0742
NW_009271783.1:3037731-3037956	226	NC_006089.5:108256563-108256776	aUCE.0743
NW_009271783.1:3117512-3117746	235	NC_006089.5:108330376-108330608	aUCE.0744
NW_009271783.1:3121886-3122190	305	NC_006089.5:108334605-108334908	aUCE.0745
NW_009271896.1:3363685-3363893	209	NC_006089.5:10845239-10845446	aUCE.0746
NW_009271029.1:428031-428315	285	NC_006089.5:109547646-109547928	aUCE.0747
NW_009271029.1:381514-381724	211	NC_006089.5:109584362-109584569	aUCE.0748
NW_009271029.1:360170-360503	334	NC_006089.5:109603363-109603687	aUCE.0749
NW_009271029.1:346955-347262	308	NC_006089.5:109616437-109616743	aUCE.0750
NW_009271029.1:322369-322655	287	NC_006089.5:109641406-109641691	aUCE.0751
NW_009271029.1:315946-316284	339	NC_006089.5:109647573-109647908	aUCE.0752
NW_009271029.1:312732-313232	501	NC_006089.5:109650608-109651107	aUCE.0753
NW_009271029.1:302848-303066	219	NC_006089.5:109660473-109660688	aUCE.0754
NW_009271029.1:301456-301755	300	NC_006089.5:109661698-109661996	aUCE.0755
NW_009271029.1:296697-297161	465	NC_006089.5:109666285-109666747	aUCE.0756
NW_009271029.1:291364-291571	208	NC_006089.5:109671397-109671602	aUCE.0757
NW_009271029.1:290750-291362	613	NC_006089.5:109671605-109672216	aUCE.0758
NW_009271027.1:5544804-5545042	239	NC_006089.5:109934840-109935075	aUCE.0759
NW_009271027.1:4410567-4410768	202	NC_006089.5:110907894-110908094	aUCE.0760
NW_009271027.1:4122813-4123022	210	NC_006089.5:111153669-111153877	aUCE.0761
NW_009271027.1:4029582-4029930	349	NC_006089.5:111233429-111233775	aUCE.0762
NW_009271027.1:4028546-4029127	582	NC_006089.5:111234260-111234836	aUCE.0763
NW_009271027.1:4023221-4023772	552	NC_006089.5:111239656-111240206	aUCE.0764
NW_009271027.1:2889674-2889908	235	NC_006089.5:112227707-112227940	aUCE.0765
NW_009271027.1:2886503-2886805	303	NC_006089.5:112231476-112231774	aUCE.0766
NW_009271027.1:2865768-2866023	256	NC_006089.5:112251982-112252235	aUCE.0767
NW_009271027.1:2800701-2800910	210	NC_006089.5:112317986-112318194	aUCE.0768
NW_009271027.1:2754021-2754270	250	NC_006089.5:112362318-112362563	aUCE.0769
NW_009271027.1:2712096-2712314	219	NC_006089.5:112404025-112404242	aUCE.0770
NW_009271027.1:2570567-2571243	677	NC_006089.5:112546813-112547484	aUCE.0771
NW_009271027.1:2557744-2558094	351	NC_006089.5:112559735-112560086	aUCE.0772
NW_009271027.1:2548381-2548615	235	NC_006089.5:112569587-112569819	aUCE.0773
NW_009271027.1:2494791-2495004	214	NC_006089.5:112620251-112620463	aUCE.0774
NW_009271896.1:3887061-3887429	369	NC_006089.5:11268443-11268811	aUCE.0775
NW_009271027.1:2254548-2254907	360	NC_006089.5:112842036-112842394	aUCE.0776
NW_009271027.1:2238116-2238351	236	NC_006089.5:112857224-112857458	aUCE.0777
NW_009271027.1:2190430-2190690	261	NC_006089.5:112898603-112898862	aUCE.0778
NW_009271027.1:2122542-2122839	298	NC_006089.5:112962564-112962860	aUCE.0779
NW_009271027.1:2118717-2118981	265	NC_006089.5:112965878-112966141	aUCE.0780
NW_009271027.1:2116639-2116841	203	NC_006089.5:112967986-112968183	aUCE.0781
NW_009271027.1:2103243-2103503	261	NC_006089.5:112982244-112982495	aUCE.0782
NW_009271027.1:2095956-2096174	219	NC_006089.5:112989962-112990179	aUCE.0783
NW_009271027.1:2081958-2082167	210	NC_006089.5:113003457-113003665	aUCE.0784
NW_009271027.1:2016217-2016421	205	NC_006089.5:113065546-113065757	aUCE.0785
NW_009271027.1:2012901-2013252	352	NC_006089.5:113068666-113069016	aUCE.0786
NW_009271027.1:1685530-1685737	208	NC_006089.5:113360098-113360300	aUCE.0787
NW_009271027.1:1108313-1108515	203	NC_006089.5:113863659-113863860	aUCE.0788
NW_009271027.1:1032234-1032607	374	NC_006089.5:113935373-113935745	aUCE.0789
NW_009271027.1:1007889-1008226	338	NC_006089.5:113961685-113962020	aUCE.0790
NW_009271027.1:990061-990347	287	NC_006089.5:113982416-113982701	aUCE.0791
NW_009271027.1:970515-970725	211	NC_006089.5:114000723-114000931	aUCE.0792
NW_009271027.1:834400-834666	267	NC_006089.5:114138696-114138962	aUCE.0793
NW_009271027.1:815098-815298	201	NC_006089.5:114158453-114158651	aUCE.0794
NW_009271027.1:701194-701437	244	NC_006089.5:114271881-114272122	aUCE.0795
NW_009271027.1:585857-586361	505	NC_006089.5:114381029-114381510	aUCE.0796
NW_009271027.1:566350-566613	264	NC_006089.5:114399120-114399382	aUCE.0797
NW_009271027.1:560302-560531	230	NC_006089.5:114405147-114405375	aUCE.0798
NW_009271027.1:559889-560218	330	NC_006089.5:114405460-114405788	aUCE.0799
NW_009271027.1:529306-529576	271	NC_006089.5:114438297-114438566	aUCE.0800
NW_009271027.1:526947-527214	268	NC_006089.5:114440583-114440847	aUCE.0801
NW_009271027.1:446657-446881	225	NC_006089.5:114515340-114515563	aUCE.0802
NW_009271027.1:418610-418869	260	NC_006089.5:114542984-114543240	aUCE.0803
NW_009271027.1:388036-388245	210	NC_006089.5:114570103-114570311	aUCE.0804
NW_009271027.1:387662-388012	351	NC_006089.5:114570336-114570685	aUCE.0805
NW_009271027.1:313274-313714	441	NC_006089.5:114635968-114636407	aUCE.0806
NW_009271027.1:227694-228076	383	NC_006089.5:114718405-114718786	aUCE.0807
NW_009271027.1:174154-174361	208	NC_006089.5:114767411-114767617	aUCE.0808
NW_009270696.1:6179034-6179334	301	NC_006089.5:115377772-115378067	aUCE.0809
NW_009270696.1:5290437-5290761	325	NC_006089.5:116229047-116229368	aUCE.0810
NW_009270696.1:5236551-5236758	208	NC_006089.5:116281873-116282079	aUCE.0811
NW_009270696.1:5211304-5211526	223	NC_006089.5:116306959-116307180	aUCE.0812
NW_009270696.1:4983182-4984117	936	NC_006089.5:116501039-116501972	aUCE.0813
NW_009272014.1:85381-85632	252	NC_006089.5:116938462-116938712	aUCE.0814
NW_009272014.1:11613-11970	358	NC_006089.5:117008349-117008705	aUCE.0815
NW_009271896.1:4386478-4386685	208	NC_006089.5:11707436-11707642	aUCE.0816
NW_009276915.1:7458557-7458811	255	NC_006089.5:117233622-117233874	aUCE.0817
NW_009276915.1:6840824-6841027	204	NC_006089.5:117794967-117795169	aUCE.0818
NW_009276915.1:6828667-6828920	254	NC_006089.5:117808198-117808447	aUCE.0819
NW_009276915.1:6790911-6791141	231	NC_006089.5:117844594-117844823	aUCE.0820
NW_009276915.1:6712335-6712539	205	NC_006089.5:117916134-117916337	aUCE.0821
NW_009276915.1:6652967-6653223	257	NC_006089.5:117972718-117972968	aUCE.0822
NW_009276915.1:6652134-6652547	414	NC_006089.5:117973387-117973799	aUCE.0823
NW_009276915.1:6612291-6612541	251	NC_006089.5:118015474-118015723	aUCE.0824
NW_009271896.1:4507672-4508236	565	NC_006089.5:11823681-11824242	aUCE.0825
NW_009276915.1:5793345-5793590	246	NC_006089.5:118763185-118763429	aUCE.0826
NW_009276915.1:5785068-5785290	223	NC_006089.5:118771527-118771747	aUCE.0827
NW_009276915.1:5784558-5785043	486	NC_006089.5:118771769-118772249	aUCE.0828
NW_009276915.1:5777144-5777356	213	NC_006089.5:118777954-118778164	aUCE.0829
NW_009276915.1:5776702-5776920	219	NC_006089.5:118778470-118778642	aUCE.0830
NW_009276915.1:5764616-5764822	207	NC_006089.5:118790237-118790442	aUCE.0831
NW_009276915.1:5626658-5626940	283	NC_006089.5:118926100-118926379	aUCE.0832
NW_009276915.1:5610447-5610882	436	NC_006089.5:118944534-118944968	aUCE.0833
NW_009276915.1:5606728-5606928	201	NC_006089.5:118948333-118948528	aUCE.0834
NW_009276915.1:5580903-5581151	249	NC_006089.5:118978022-118978268	aUCE.0835
NW_009276915.1:5580539-5580779	241	NC_006089.5:118978392-118978631	aUCE.0836
NW_009276915.1:5551749-5552138	390	NC_006089.5:119009461-119009847	aUCE.0837
NW_009276915.1:5535279-5535496	218	NC_006089.5:119027010-119027226	aUCE.0838
NW_009276915.1:5493595-5494015	421	NC_006089.5:119072913-119073332	aUCE.0839
NW_009276915.1:5450490-5450812	323	NC_006089.5:119122713-119123034	aUCE.0840
NW_009276915.1:5422530-5422751	222	NC_006089.5:119152702-119152922	aUCE.0841
NW_009276915.1:5419505-5419706	202	NC_006089.5:119155729-119155929	aUCE.0842
NW_009276915.1:5389112-5389342	231	NC_006089.5:119185673-119185902	aUCE.0843
NW_009276915.1:5383864-5384229	366	NC_006089.5:119189366-119189730	aUCE.0844
NW_009276915.1:5382156-5382364	209	NC_006089.5:119191270-119191477	aUCE.0845
NW_009276915.1:5363740-5364261	522	NC_006089.5:119208548-119209063	aUCE.0846
NW_009276915.1:5362777-5363094	318	NC_006089.5:119209720-119210036	aUCE.0847
NW_009276915.1:5336682-5336976	295	NC_006089.5:119235666-119235959	aUCE.0848
NW_009276915.1:5299053-5299278	226	NC_006089.5:119273601-119273825	aUCE.0849
NW_009276915.1:5298336-5298582	247	NC_006089.5:119274290-119274535	aUCE.0850
NW_009276915.1:5284224-5284569	346	NC_006089.5:119288149-119288491	aUCE.0851
NW_009276915.1:5277842-5278047	206	NC_006089.5:119295081-119295284	aUCE.0852
NW_009276915.1:5274021-5274269	249	NC_006089.5:119298905-119299152	aUCE.0853
NW_009276915.1:5273550-5274019	470	NC_006089.5:119299155-119299623	aUCE.0854
NW_009276915.1:5267920-5268237	318	NC_006089.5:119304716-119305032	aUCE.0855
NW_009276915.1:5263996-5264348	353	NC_006089.5:119308421-119308772	aUCE.0856
NW_009276915.1:5261323-5261763	441	NC_006089.5:119311020-119311459	aUCE.0857
NW_009276915.1:5260296-5260603	308	NC_006089.5:119312196-119312501	aUCE.0858
NW_009276915.1:5259970-5260172	203	NC_006089.5:119312623-119312824	aUCE.0859
NW_009276915.1:5255855-5256209	355	NC_006089.5:119316534-119316886	aUCE.0860
NW_009276915.1:5254422-5254645	224	NC_006089.5:119318097-119318319	aUCE.0861
NW_009276915.1:5253855-5254126	272	NC_006089.5:119318616-119318884	aUCE.0862
NW_009276915.1:5252358-5252647	290	NC_006089.5:119320031-119320319	aUCE.0863
NW_009276915.1:5252110-5252354	245	NC_006089.5:119320324-119320567	aUCE.0864
NW_009276915.1:5247293-5247569	277	NC_006089.5:119325159-119325434	aUCE.0865
NW_009276915.1:5224765-5225131	367	NC_006089.5:119348080-119348445	aUCE.0866
NW_009276915.1:5203731-5204490	760	NC_006089.5:119369513-119370272	aUCE.0867
NW_009276915.1:5187796-5188284	489	NC_006089.5:119385267-119385754	aUCE.0868
NW_009276915.1:5185847-5186466	620	NC_006089.5:119387129-119387747	aUCE.0869
NW_009276915.1:5184217-5184757	541	NC_006089.5:119388827-119389366	aUCE.0870
NW_009276915.1:5148724-5149233	510	NC_006089.5:119423864-119424372	aUCE.0871
NW_009276915.1:5138849-5139087	239	NC_006089.5:119433691-119433928	aUCE.0872
NW_009276915.1:4997715-4997930	216	NC_006089.5:119557398-119557613	aUCE.0873
NW_009276915.1:4983280-4983481	202	NC_006089.5:119573299-119573496	aUCE.0874
NW_009276915.1:4943327-4943758	432	NC_006089.5:119611719-119612149	aUCE.0875
NW_009276915.1:4912204-4912471	268	NC_006089.5:119639773-119640039	aUCE.0876
NW_009276915.1:4867866-4868439	574	NC_006089.5:119679899-119680471	aUCE.0877
NW_009276915.1:4862351-4862601	251	NC_006089.5:119685730-119685978	aUCE.0878
NW_009276915.1:4836216-4836420	205	NC_006089.5:119708228-119708430	aUCE.0879
NW_009276915.1:4740492-4740703	212	NC_006089.5:119791912-119792122	aUCE.0880
NW_009276915.1:4597123-4597327	205	NC_006089.5:119969048-119969242	aUCE.0881
NW_009276915.1:4596234-4596557	324	NC_006089.5:119969868-119970172	aUCE.0882
NW_009276915.1:4558895-4559247	353	NC_006089.5:120007417-120007752	aUCE.0883
NW_009276915.1:4550335-4550538	204	NC_006089.5:120014558-120014758	aUCE.0884
NW_009276915.1:4538400-4538654	255	NC_006089.5:120028443-120028696	aUCE.0885
NW_009276915.1:4531969-4532232	264	NC_006089.5:120034660-120034922	aUCE.0886
NW_009276915.1:4469656-4469927	272	NC_006089.5:120098233-120098503	aUCE.0887
NW_009276915.1:4418519-4418721	203	NC_006089.5:120150239-120150440	aUCE.0888
NW_009276915.1:3900309-3900515	207	NC_006089.5:120637867-120638072	aUCE.0889
NW_009276915.1:3897339-3897564	226	NC_006089.5:120640550-120640774	aUCE.0890
NW_009276915.1:2456963-2457177	215	NC_006089.5:121879265-121879474	aUCE.0891
NW_009271896.1:4930816-4931056	241	NC_006089.5:12216172-12216391	aUCE.0892
NW_009276915.1:1803888-1804145	258	NC_006089.5:122483663-122483917	aUCE.0893
NW_009271896.1:4968477-4968698	222	NC_006089.5:12254843-12255063	aUCE.0894
NW_009271138.1:1349880-1350092	213	NC_006089.5:123563694-123563905	aUCE.0895
NW_009271221.1:6292879-6293105	227	NC_006089.5:124802569-124802793	aUCE.0896
NW_009271221.1:6240250-6240460	211	NC_006089.5:124850517-124850723	aUCE.0897
NW_009271221.1:6175832-6176174	343	NC_006089.5:124911419-124911760	aUCE.0898
NW_009271221.1:6175603-6175830	228	NC_006089.5:124911763-124911989	aUCE.0899
NW_009271221.1:6136392-6136624	233	NC_006089.5:124949992-124950220	aUCE.0900
NW_009271221.1:6103536-6103749	214	NC_006089.5:124978143-124978355	aUCE.0901
NW_009271221.1:6082588-6082810	223	NC_006089.5:124998861-124999079	aUCE.0902
NW_009271221.1:6055566-6055807	242	NC_006089.5:125024294-125024534	aUCE.0903
NW_009271221.1:6052641-6052939	299	NC_006089.5:125027071-125027361	aUCE.0904
NW_009271221.1:6003258-6003591	334	NC_006089.5:125074385-125074717	aUCE.0905
NW_009271221.1:5963378-5963725	348	NC_006089.5:125113394-125113737	aUCE.0906
NW_009271221.1:5957989-5958211	223	NC_006089.5:125118634-125118854	aUCE.0907
NW_009271221.1:5954151-5954386	236	NC_006089.5:125122351-125122585	aUCE.0908
NW_009271221.1:5930275-5930679	405	NC_006089.5:125146317-125146720	aUCE.0909
NW_009271221.1:5908652-5908923	272	NC_006089.5:125167397-125167666	aUCE.0910
NW_009271221.1:5903496-5903777	282	NC_006089.5:125172590-125172870	aUCE.0911
NW_009271221.1:5885109-5885344	236	NC_006089.5:125188386-125188619	aUCE.0912
NW_009271221.1:5875584-5875812	229	NC_006089.5:125197499-125197721	aUCE.0913
NW_009271221.1:5865942-5866250	309	NC_006089.5:125206145-125206451	aUCE.0914
NW_009271221.1:5857176-5857671	496	NC_006089.5:125213905-125214399	aUCE.0915
NW_009271221.1:5818629-5818929	301	NC_006089.5:125249536-125249835	aUCE.0916
NW_009271221.1:5801053-5801356	304	NC_006089.5:125267477-125267779	aUCE.0917
NW_009271221.1:5748215-5748482	268	NC_006089.5:125318423-125318689	aUCE.0918
NW_009271221.1:5707958-5708193	236	NC_006089.5:125358858-125359091	aUCE.0919
NW_009271221.1:5586268-5586670	403	NC_006089.5:125478938-125479339	aUCE.0920
NW_009271221.1:5551510-5551814	305	NC_006089.5:125515275-125515577	aUCE.0921
NW_009271221.1:5533705-5533981	277	NC_006089.5:125534068-125534343	aUCE.0922
NW_009271221.1:5521578-5521783	206	NC_006089.5:125544922-125545126	aUCE.0923
NW_009271221.1:5511611-5511890	280	NC_006089.5:125552777-125553053	aUCE.0924
NW_009271221.1:5507688-5508104	417	NC_006089.5:125556189-125556603	aUCE.0925
NW_009271221.1:5496771-5497061	291	NC_006089.5:125565804-125566092	aUCE.0926
NW_009271221.1:5495959-5496354	396	NC_006089.5:125566511-125566903	aUCE.0927
NW_009271221.1:5484852-5485064	213	NC_006089.5:125575678-125575889	aUCE.0928
NW_009271221.1:5467250-5467496	247	NC_006089.5:125591826-125592071	aUCE.0929
NW_009271221.1:5450899-5451124	226	NC_006089.5:125608795-125609019	aUCE.0930
NW_009271221.1:5447075-5447278	204	NC_006089.5:125612548-125612751	aUCE.0931
NW_009271221.1:5399460-5399705	246	NC_006089.5:125657149-125657393	aUCE.0932
NW_009271221.1:5375290-5375521	232	NC_006089.5:125675457-125675687	aUCE.0933
NW_009271221.1:4483015-4483289	275	NC_006089.5:126409486-126409758	aUCE.0934
NW_009271221.1:3930408-3930659	252	NC_006089.5:126873523-126873773	aUCE.0935
NW_009271221.1:2794080-2794380	301	NC_006089.5:127888793-127889092	aUCE.0936
NW_009271221.1:2793759-2794078	320	NC_006089.5:127889095-127889413	aUCE.0937
NW_009271221.1:2789476-2789841	366	NC_006089.5:127892850-127893213	aUCE.0938
NW_009271221.1:2775242-2775464	223	NC_006089.5:127907545-127907766	aUCE.0939
NW_009271221.1:2563670-2563914	245	NC_006089.5:128082700-128082943	aUCE.0940
NW_009271221.1:2563186-2563668	483	NC_006089.5:128082949-128083426	aUCE.0941
NW_009271221.1:2551413-2551642	230	NC_006089.5:128094509-128094737	aUCE.0942
NW_009271221.1:2528113-2528394	282	NC_006089.5:128114154-128114434	aUCE.0943
NW_009271221.1:2475783-2475999	217	NC_006089.5:128166629-128166844	aUCE.0944
NW_009271221.1:2095712-2095950	239	NC_006089.5:128496955-128497191	aUCE.0945
NW_009271729.1:1787220-1787425	206	NC_006089.5:128779767-128779971	aUCE.0946
NW_009271729.1:1509862-1510104	243	NC_006089.5:128985074-128985302	aUCE.0947
NW_009271729.1:1454989-1455294	306	NC_006089.5:129035107-129035411	aUCE.0948
NW_009271729.1:1443072-1443444	373	NC_006089.5:129048972-129049332	aUCE.0949
NW_009271729.1:695124-695350	227	NC_006089.5:129681258-129681454	aUCE.0950
NW_009271729.1:343815-344019	205	NC_006089.5:129993003-129993205	aUCE.0951
NW_009271729.1:297502-298172	671	NC_006089.5:130038188-130038857	aUCE.0952
NW_009271729.1:295181-295403	223	NC_006089.5:130040923-130041144	aUCE.0953
NW_009271729.1:200737-201672	936	NC_006089.5:130133499-130134433	aUCE.0954
NW_009271729.1:196847-197545	699	NC_006089.5:130137552-130138251	aUCE.0955
NW_009271729.1:155793-156299	507	NC_006089.5:130178101-130178605	aUCE.0956
NW_009271729.1:155481-155740	260	NC_006089.5:130178681-130178938	aUCE.0957
NW_009271729.1:152057-152274	218	NC_006089.5:130182147-130182363	aUCE.0958
NW_009271729.1:130885-131146	262	NC_006089.5:130203708-130203964	aUCE.0959
NW_009271729.1:86581-86944	364	NC_006089.5:130240997-130241359	aUCE.0960
NW_009271729.1:41005-41377	373	NC_006089.5:130285098-130285470	aUCE.0961
NW_009271729.1:34493-34883	391	NC_006089.5:130291613-130292002	aUCE.0962
NW_009271729.1:34123-34489	367	NC_006089.5:130292007-130292372	aUCE.0963
NW_009271729.1:28415-28624	210	NC_006089.5:130297755-130297965	aUCE.0964
NW_009271729.1:1152-1367	216	NC_006089.5:130322412-130322619	aUCE.0965
NW_009272081.1:309311-310160	850	NC_006089.5:130355219-130356066	aUCE.0966
NW_009272081.1:274638-274939	302	NC_006089.5:130391436-130391736	aUCE.0967
NW_009272081.1:255168-255503	336	NC_006089.5:130410073-130410407	aUCE.0968
NW_009272081.1:242117-243036	920	NC_006089.5:130422547-130423465	aUCE.0969
NW_009272081.1:232832-233305	474	NC_006089.5:130431736-130432205	aUCE.0970
NW_009272081.1:219093-219478	386	NC_006089.5:130446547-130446931	aUCE.0971
NW_009272081.1:182382-182604	223	NC_006089.5:130484086-130484307	aUCE.0972
NW_009271896.1:5937599-5937819	221	NC_006089.5:13093069-13093286	aUCE.0973
NW_009271896.1:6346242-6346454	213	NC_006089.5:13462579-13462790	aUCE.0974
NW_009271901.1:476664-477296	633	NC_006089.5:134838016-134838646	aUCE.0975
NW_009271901.1:511178-511380	203	NC_006089.5:134871865-134872066	aUCE.0976
NW_009271901.1:557517-557735	219	NC_006089.5:134914152-134914366	aUCE.0977
NW_009271901.1:654259-654632	374	NC_006089.5:135002938-135003310	aUCE.0978
NW_009271901.1:657527-657839	313	NC_006089.5:135006427-135006733	aUCE.0979
NW_009271901.1:960986-961216	231	NC_006089.5:135291053-135291282	aUCE.0980
NW_009271901.1:1044909-1045303	395	NC_006089.5:135376312-135376705	aUCE.0981
NW_009271901.1:1109120-1109599	480	NC_006089.5:135434309-135434786	aUCE.0982
NW_009271901.1:1109703-1109949	247	NC_006089.5:135434891-135435136	aUCE.0983
NW_009271901.1:1130368-1130610	243	NC_006089.5:135453703-135453939	aUCE.0984
NW_009270281.1:2110394-2110599	206	NC_006089.5:136552043-136552247	aUCE.0985
NW_009270281.1:755593-755793	201	NC_006089.5:137761372-137761571	aUCE.0986
NW_009270281.1:506915-507175	261	NC_006089.5:137976709-137976966	aUCE.0987
NW_009271215.1:4907540-4907745	206	NC_006089.5:138499388-138499589	aUCE.0988
NW_009270848.1:113539-113782	244	NC_006089.5:13942740-13942982	aUCE.0989
NW_009270848.1:163782-164072	291	NC_006089.5:13989530-13989815	aUCE.0990
NW_009271215.1:3269991-3270200	210	NC_006089.5:140020068-140020274	aUCE.0991
NW_009271215.1:2980560-2980779	220	NC_006089.5:140280004-140280215	aUCE.0992
NW_009270381.1:39107-39336	230	NC_006089.5:140598764-140598991	aUCE.0993
NW_009270381.1:42567-42791	225	NC_006089.5:140602403-140602625	aUCE.0994
NW_009270381.1:372865-373220	356	NC_006089.5:140911910-140912264	aUCE.0995
NW_009271513.1:3091739-3092031	293	NC_006089.5:14181120-14181405	aUCE.0996
NW_009271513.1:3090773-3091132	360	NC_006089.5:14182015-14182372	aUCE.0997
NW_009271175.1:585139-585384	246	NC_006089.5:143187571-143187814	aUCE.0998
NW_009270168.1:125622-125857	236	NC_006089.5:143862377-143862611	aUCE.0999
NW_009271513.1:2816890-2817395	506	NC_006089.5:14388704-14389208	aUCE.1000
NW_009271513.1:2810355-2810627	273	NC_006089.5:14395981-14396252	aUCE.1001
NW_009270296.1:299807-300020	214	NC_006089.5:144274658-144274868	aUCE.1002
NW_009270296.1:1057061-1057354	294	NC_006089.5:145003832-145004124	aUCE.1003
NW_009270296.1:1068451-1068695	245	NC_006089.5:145013909-145014152	aUCE.1004
NW_009270296.1:1098491-1098708	218	NC_006089.5:145036654-145036870	aUCE.1005
NW_009270296.1:1159611-1159849	239	NC_006089.5:145092838-145093075	aUCE.1006
NW_009271890.1:811022-811224	203	NC_006089.5:146029878-146030079	aUCE.1007
NW_009271890.1:1192957-1193170	214	NC_006089.5:146348181-146348393	aUCE.1008
NW_009276908.1:456823-457036	214	NC_006089.5:147684330-147684541	aUCE.1009
NW_009270953.1:212169-212376	208	NC_006089.5:148723862-148724068	aUCE.1010
NW_009270953.1:209669-209912	244	NC_006089.5:148727503-148727742	aUCE.1011
NW_009270953.1:135589-136334	746	NC_006089.5:148803859-148804606	aUCE.1012
NW_009270919.1:232648-232875	228	NC_006089.5:149452187-149452412	aUCE.1013
NW_009271513.1:1799832-1800056	225	NC_006089.5:15216690-15216913	aUCE.1014
NW_009271513.1:1749174-1749460	287	NC_006089.5:15255914-15256199	aUCE.1015
NW_009271513.1:1233404-1233611	208	NC_006089.5:15681313-15681519	aUCE.1016
NW_009271513.1:1171109-1171330	222	NC_006089.5:15732410-15732630	aUCE.1017
NW_009271513.1:1071479-1071713	235	NC_006089.5:15817716-15817949	aUCE.1018
NW_009271513.1:779260-779485	226	NC_006089.5:16086542-16086768	aUCE.1019
NW_009271513.1:772181-772531	351	NC_006089.5:16093406-16093755	aUCE.1020
NW_009271062.1:242550-242808	259	NC_006089.5:16931808-16932065	aUCE.1021
NW_009271062.1:322364-322602	239	NC_006089.5:17001147-17001384	aUCE.1022
NW_009271062.1:742678-742921	244	NC_006089.5:17386009-17386249	aUCE.1023
NW_009271062.1:773665-773908	244	NC_006089.5:17406755-17406997	aUCE.1024
NW_009271062.1:774321-774603	283	NC_006089.5:17407407-17407688	aUCE.1025
NW_009271062.1:777564-777913	350	NC_006089.5:17409637-17409983	aUCE.1026
NW_009271062.1:1189130-1189355	226	NC_006089.5:17736294-17736476	aUCE.1027
NW_009271062.1:1391757-1392217	461	NC_006089.5:17900762-17901221	aUCE.1028
NW_009271062.1:1424903-1425133	231	NC_006089.5:17930785-17931014	aUCE.1029
NW_009271062.1:1426923-1427162	240	NC_006089.5:17932780-17933014	aUCE.1030
NW_009271062.1:1567504-1567751	248	NC_006089.5:18043716-18043945	aUCE.1031
NW_009271062.1:1575326-1575588	263	NC_006089.5:18051336-18051564	aUCE.1032
NW_009271062.1:1614874-1615202	329	NC_006089.5:18083233-18083558	aUCE.1033
NW_009271062.1:2895364-2895564	201	NC_006089.5:19126452-19126651	aUCE.1034
NW_009271062.1:4100557-4100800	244	NC_006089.5:20174668-20174910	aUCE.1035
NW_009271904.1:3183699-3183909	211	NC_006089.5:2035447-2035655	aUCE.1036
NW_009271177.1:719053-719267	215	NC_006089.5:20957174-20957387	aUCE.1037
NW_009270819.1:2953426-2953713	288	NC_006089.5:217382-217668	aUCE.1038
NW_009271130.1:427071-427317	247	NC_006089.5:21943800-21944045	aUCE.1039
NW_009271130.1:519081-519297	217	NC_006089.5:22027277-22027490	aUCE.1040
NW_009271130.1:536228-536436	209	NC_006089.5:22044357-22044564	aUCE.1041
NW_009271130.1:546000-546268	269	NC_006089.5:22053629-22053896	aUCE.1042
NW_009270819.1:2968039-2968273	235	NC_006089.5:225978-226198	aUCE.1043
NW_009270819.1:2974724-2974957	234	NC_006089.5:227305-227536	aUCE.1044
NW_009271130.1:1370121-1370722	602	NC_006089.5:22764206-22764806	aUCE.1045
NW_009271130.1:1401894-1402157	264	NC_006089.5:22792019-22792276	aUCE.1046
NW_009271130.1:1421232-1421455	224	NC_006089.5:22809957-22810180	aUCE.1047
NW_009270819.1:2979649-2980042	394	NC_006089.5:230999-231359	aUCE.1048
NW_009270819.1:2982802-2983003	202	NC_006089.5:232813-233013	aUCE.1049
NW_009271130.1:2847605-2847830	226	NC_006089.5:23962148-23962372	aUCE.1050
NW_009271130.1:2917738-2917967	230	NC_006089.5:24025003-24025231	aUCE.1051
NW_009271130.1:2936659-2936955	297	NC_006089.5:24042287-24042582	aUCE.1052
NW_009270819.1:3003757-3004084	328	NC_006089.5:240910-241211	aUCE.1053
NW_009271130.1:3107515-3107720	206	NC_006089.5:24195676-24195883	aUCE.1054
NW_009271130.1:3274863-3275114	252	NC_006089.5:24338631-24338881	aUCE.1055
NW_009271130.1:3294072-3294298	227	NC_006089.5:24356464-24356689	aUCE.1056
NW_009271130.1:3349742-3349980	239	NC_006089.5:24403914-24404148	aUCE.1057
NW_009271130.1:3394832-3395348	517	NC_006089.5:24441756-24442268	aUCE.1058
NW_009271130.1:3401810-3402392	583	NC_006089.5:24446967-24447548	aUCE.1059
NW_009270819.1:3015840-3016154	315	NC_006089.5:247272-247576	aUCE.1060
NW_009271130.1:3921154-3921420	267	NC_006089.5:24804578-24804841	aUCE.1061
NW_009270819.1:3018941-3019152	212	NC_006089.5:249342-249531	aUCE.1062
NW_009271130.1:4249367-4249594	228	NC_006089.5:25093868-25094094	aUCE.1063
NW_009271130.1:4385828-4386039	212	NC_006089.5:25221607-25221815	aUCE.1064
NW_009270819.1:3025341-3025581	241	NC_006089.5:252833-253064	aUCE.1065
NW_009271130.1:4465331-4465566	236	NC_006089.5:25287716-25287949	aUCE.1066
NW_009271130.1:4622795-4623041	247	NC_006089.5:25416998-25417243	aUCE.1067
NW_009271866.1:398653-398886	234	NC_006089.5:25512036-25512268	aUCE.1068
NW_009271904.1:2508146-2508377	232	NC_006089.5:2559309-2559539	aUCE.1069
NW_009271866.1:179051-179251	201	NC_006089.5:25717442-25717637	aUCE.1070
NW_009271866.1:153960-154204	245	NC_006089.5:25737853-25738096	aUCE.1071
NW_009270819.1:3030962-3031233	272	NC_006089.5:257535-257792	aUCE.1072
NW_009271904.1:2470077-2470283	207	NC_006089.5:2595150-2595350	aUCE.1073
NW_009271904.1:2468983-2469218	236	NC_006089.5:2596160-2596393	aUCE.1074
NW_009271624.1:4968210-4968419	210	NC_006089.5:25982192-25982400	aUCE.1075
NW_009271624.1:4763989-4764193	205	NC_006089.5:26166567-26166770	aUCE.1076
NW_009271624.1:3722995-3723239	245	NC_006089.5:27083629-27083872	aUCE.1077
NW_009271624.1:3699003-3699264	262	NC_006089.5:27102957-27103212	aUCE.1078
NW_009271624.1:3675148-3675682	535	NC_006089.5:27124203-27124733	aUCE.1079
NW_009271624.1:3620266-3620472	207	NC_006089.5:27180115-27180318	aUCE.1080
NW_009271624.1:3610041-3610294	254	NC_006089.5:27190788-27191037	aUCE.1081
NW_009271904.1:2328182-2328408	227	NC_006089.5:2719964-2720187	aUCE.1082
NW_009271624.1:3507941-3508152	212	NC_006089.5:27292251-27292461	aUCE.1083
NW_009271624.1:3499944-3500230	287	NC_006089.5:27300186-27300469	aUCE.1084
NW_009271624.1:3331380-3331585	206	NC_006089.5:27452781-27452982	aUCE.1085
NW_009271624.1:3320722-3321166	445	NC_006089.5:27464263-27464706	aUCE.1086
NW_009271624.1:3171760-3171968	209	NC_006089.5:27599974-27600172	aUCE.1087
NW_009271624.1:2814414-2814737	324	NC_006089.5:27901526-27901846	aUCE.1088
NW_009271624.1:2813938-2814407	470	NC_006089.5:27901855-27902320	aUCE.1089
NW_009271624.1:2749254-2749466	213	NC_006089.5:27959309-27959518	aUCE.1090
NW_009271624.1:2693233-2693448	216	NC_006089.5:28006172-28006386	aUCE.1091
NW_009271624.1:2665535-2665751	217	NC_006089.5:28033615-28033830	aUCE.1092
NW_009271624.1:2622248-2622471	224	NC_006089.5:28072711-28072933	aUCE.1093
NW_009271624.1:2599098-2599303	206	NC_006089.5:28095619-28095823	aUCE.1094
NW_009271624.1:2586366-2586577	212	NC_006089.5:28108268-28108479	aUCE.1095
NW_009271624.1:2455597-2455841	245	NC_006089.5:28230870-28231113	aUCE.1096
NW_009271904.1:2176812-2177130	319	NC_006089.5:2850500-2850816	aUCE.1097
NW_009271624.1:2119234-2119434	201	NC_006089.5:28528004-28528199	aUCE.1098
NW_009271624.1:1325703-1325948	246	NC_006089.5:29197905-29198132	aUCE.1099
NW_009271624.1:1199866-1200108	243	NC_006089.5:29310544-29310785	aUCE.1100
NW_009271624.1:1177231-1177447	217	NC_006089.5:29332920-29333135	aUCE.1101
NW_009271624.1:1163730-1163934	205	NC_006089.5:29345837-29346040	aUCE.1102
NW_009271624.1:1074052-1074275	224	NC_006089.5:29424968-29425188	aUCE.1103
NW_009271624.1:1069956-1070455	500	NC_006089.5:29428572-29429070	aUCE.1104
NW_009271624.1:1056136-1056368	233	NC_006089.5:29440816-29441047	aUCE.1105
NW_009271624.1:877719-877921	203	NC_006089.5:29609387-29609582	aUCE.1106
NW_009271624.1:845649-845894	246	NC_006089.5:29635138-29635382	aUCE.1107
NW_009271624.1:674419-674655	237	NC_006089.5:29788440-29788675	aUCE.1108
NW_009271624.1:255585-255979	395	NC_006089.5:30161111-30161494	aUCE.1109
NW_009271624.1:251616-251882	267	NC_006089.5:30164792-30165056	aUCE.1110
NW_009271624.1:248752-249058	307	NC_006089.5:30166990-30167288	aUCE.1111
NW_009271624.1:245011-245600	590	NC_006089.5:30169771-30170357	aUCE.1112
NW_009271624.1:158174-158381	208	NC_006089.5:30241768-30241973	aUCE.1113
NW_009271624.1:145895-146198	304	NC_006089.5:30251752-30252053	aUCE.1114
NW_009271624.1:143792-144144	353	NC_006089.5:30253824-30254175	aUCE.1115
NW_009271624.1:83660-83922	263	NC_006089.5:30303683-30303942	aUCE.1116
NW_009271423.1:175865-176076	212	NC_006089.5:30521621-30521831	aUCE.1117
NW_009271289.1:6347920-6348241	322	NC_006089.5:30970348-30970666	aUCE.1118
NW_009271289.1:5293751-5293961	211	NC_006089.5:31978397-31978606	aUCE.1119
NW_009271289.1:5292664-5292901	238	NC_006089.5:31979293-31979529	aUCE.1120
NW_009271289.1:5272141-5272361	221	NC_006089.5:31999667-31999886	aUCE.1121
NW_009271289.1:5041187-5041476	290	NC_006089.5:32183459-32183747	aUCE.1122
NW_009271289.1:5039915-5040545	631	NC_006089.5:32184391-32185017	aUCE.1123
NW_009271289.1:4959633-4959992	360	NC_006089.5:32248443-32248800	aUCE.1124
NW_009271289.1:4953834-4954120	287	NC_006089.5:32253732-32253974	aUCE.1125
NW_009271289.1:4946273-4946498	226	NC_006089.5:32258199-32258422	aUCE.1126
NW_009271289.1:4929715-4929950	236	NC_006089.5:32271026-32271260	aUCE.1127
NW_009271289.1:4912207-4912588	382	NC_006089.5:32285990-32286369	aUCE.1128
NW_009271289.1:4873937-4874174	238	NC_006089.5:32315307-32315541	aUCE.1129
NW_009271289.1:4829204-4829526	323	NC_006089.5:32351374-32351695	aUCE.1130
NW_009271289.1:4790594-4790982	389	NC_006089.5:32380891-32381269	aUCE.1131
NW_009271289.1:4780129-4780461	333	NC_006089.5:32391556-32391877	aUCE.1132
NW_009271289.1:4777092-4777397	306	NC_006089.5:32394073-32394376	aUCE.1133
NW_009271289.1:4761836-4762210	375	NC_006089.5:32408601-32408974	aUCE.1134
NW_009271289.1:4741034-4741422	389	NC_006089.5:32426942-32427330	aUCE.1135
NW_009271289.1:4703790-4704028	239	NC_006089.5:32460035-32460272	aUCE.1136
NW_009271289.1:4703557-4703788	232	NC_006089.5:32460275-32460505	aUCE.1137
NW_009271289.1:4700402-4700605	204	NC_006089.5:32463247-32463449	aUCE.1138
NW_009271289.1:4677435-4677673	239	NC_006089.5:32483546-32483783	aUCE.1139
NW_009271289.1:4625334-4625569	236	NC_006089.5:32532532-32532766	aUCE.1140
NW_009271289.1:4567520-4567868	349	NC_006089.5:32584583-32584928	aUCE.1141
NW_009271289.1:4563199-4563399	201	NC_006089.5:32589052-32589255	aUCE.1142
NW_009271289.1:4559817-4560178	362	NC_006089.5:32592175-32592526	aUCE.1143
NW_009271289.1:4542059-4542262	204	NC_006089.5:32610187-32610386	aUCE.1144
NW_009271289.1:4534992-4535228	237	NC_006089.5:32617293-32617529	aUCE.1145
NW_009271289.1:4530840-4531317	478	NC_006089.5:32621113-32621585	aUCE.1146
NW_009271289.1:4529810-4530238	429	NC_006089.5:32622311-32622659	aUCE.1147
NW_009271289.1:4515066-4515384	319	NC_006089.5:32636822-32637131	aUCE.1148
NW_009271289.1:4513541-4513742	202	NC_006089.5:32638175-32638373	aUCE.1149
NW_009271289.1:4510482-4510739	258	NC_006089.5:32641182-32641435	aUCE.1150
NW_009271289.1:4503417-4503678	262	NC_006089.5:32647714-32647965	aUCE.1151
NW_009271289.1:4500408-4500612	205	NC_006089.5:32650660-32650863	aUCE.1152
NW_009271289.1:4486018-4486235	218	NC_006089.5:32664712-32664921	aUCE.1153
NW_009271289.1:4383313-4383608	296	NC_006089.5:32762815-32763106	aUCE.1154
NW_009271289.1:4300244-4300563	320	NC_006089.5:32844863-32845179	aUCE.1155
NW_009271289.1:4292191-4292443	253	NC_006089.5:32852703-32852954	aUCE.1156
NW_009271289.1:4288498-4288701	204	NC_006089.5:32855951-32856093	aUCE.1157
NW_009271289.1:4272070-4272334	265	NC_006089.5:32870533-32870796	aUCE.1158
NW_009271289.1:4252873-4253420	548	NC_006089.5:32887771-32888317	aUCE.1159
NW_009271289.1:4120151-4120376	226	NC_006089.5:32996128-32996350	aUCE.1160
NW_009271289.1:4092382-4092610	229	NC_006089.5:33020089-33020316	aUCE.1161
NW_009271289.1:3806141-3806381	241	NC_006089.5:33267789-33268027	aUCE.1162
NW_009271289.1:3802892-3803104	213	NC_006089.5:33270976-33271181	aUCE.1163
NW_009271289.1:3585595-3585818	224	NC_006089.5:33477841-33478062	aUCE.1164
NW_009271289.1:2948655-2948869	215	NC_006089.5:34051565-34051778	aUCE.1165
NW_009271289.1:2175689-2175899	211	NC_006089.5:34728401-34728610	aUCE.1166
NW_009271289.1:2150472-2150779	308	NC_006089.5:34748787-34749088	aUCE.1167
NW_009271289.1:2107184-2107446	263	NC_006089.5:34788358-34788619	aUCE.1168
NW_009271289.1:2074386-2074793	408	NC_006089.5:34817384-34817787	aUCE.1169
NW_009271289.1:2030074-2030617	544	NC_006089.5:34859674-34860216	aUCE.1170
NW_009271289.1:1969532-1969768	237	NC_006089.5:34914438-34914673	aUCE.1171
NW_009271289.1:1958751-1958984	234	NC_006089.5:34926065-34926297	aUCE.1172
NW_009271289.1:1926263-1926465	203	NC_006089.5:34959614-34959815	aUCE.1173
NW_009271289.1:1873127-1873870	744	NC_006089.5:35008165-35008895	aUCE.1174
NW_009271289.1:1817443-1817723	281	NC_006089.5:35059007-35059286	aUCE.1175
NW_009271289.1:1796719-1796984	266	NC_006089.5:35084434-35084698	aUCE.1176
NW_009271289.1:1787243-1787501	259	NC_006089.5:35093486-35093739	aUCE.1177
NW_009271289.1:1695912-1696132	221	NC_006089.5:35158754-35158973	aUCE.1178
NW_009271289.1:1686547-1687191	645	NC_006089.5:35167251-35167894	aUCE.1179
NW_009271289.1:1685709-1686114	406	NC_006089.5:35168356-35168760	aUCE.1180
NW_009271289.1:1679552-1679810	259	NC_006089.5:35174414-35174671	aUCE.1181
NW_009271289.1:1665661-1665978	318	NC_006089.5:35188052-35188367	aUCE.1182
NW_009271289.1:1653561-1653776	216	NC_006089.5:35199585-35199796	aUCE.1183
NW_009271289.1:1652181-1652400	220	NC_006089.5:35200950-35201169	aUCE.1184
NW_009271289.1:1638539-1639070	532	NC_006089.5:35213698-35214228	aUCE.1185
NW_009271289.1:1634482-1634728	247	NC_006089.5:35218154-35218399	aUCE.1186
NW_009271289.1:1634165-1634414	250	NC_006089.5:35218468-35218716	aUCE.1187
NW_009271289.1:1633710-1633912	203	NC_006089.5:35218978-35219172	aUCE.1188
NW_009271289.1:1619624-1619999	376	NC_006089.5:35232615-35232990	aUCE.1189
NW_009271289.1:1618890-1619120	231	NC_006089.5:35233495-35233724	aUCE.1190
NW_009271289.1:1612211-1612413	203	NC_006089.5:35239991-35240189	aUCE.1191
NW_009271289.1:1448606-1448876	271	NC_006089.5:35391786-35392055	aUCE.1192
NW_009271289.1:1423922-1424620	699	NC_006089.5:35412297-35412994	aUCE.1193
NW_009271289.1:1371608-1371923	316	NC_006089.5:35458627-35458940	aUCE.1194
NW_009271289.1:453833-454132	300	NC_006089.5:36257896-36258182	aUCE.1195
NW_009270201.1:408256-408494	239	NC_006089.5:36821434-36821670	aUCE.1196
NW_009270201.1:332331-332536	206	NC_006089.5:36896519-36896723	aUCE.1197
NW_009270201.1:38859-39069	211	NC_006089.5:37177168-37177377	aUCE.1198
NW_009274994.1:7948769-7948977	209	NC_006089.5:37521749-37521956	aUCE.1199
NW_009271904.1:1078829-1079029	201	NC_006089.5:3758284-3758484	aUCE.1200
NW_009274994.1:7833623-7833954	332	NC_006089.5:37630159-37630489	aUCE.1201
NW_009274994.1:7826435-7826771	337	NC_006089.5:37636601-37636936	aUCE.1202
NW_009274994.1:7813769-7814026	258	NC_006089.5:37649772-37650028	aUCE.1203
NW_009274994.1:7783662-7783867	206	NC_006089.5:37681803-37682007	aUCE.1204
NW_009274994.1:7774399-7774646	248	NC_006089.5:37689493-37689739	aUCE.1205
NW_009274994.1:7773856-7774095	240	NC_006089.5:37690047-37690282	aUCE.1206
NW_009274994.1:7769521-7769776	256	NC_006089.5:37693886-37694140	aUCE.1207
NW_009274994.1:7759174-7759543	370	NC_006089.5:37703943-37704311	aUCE.1208
NW_009274994.1:7674945-7675182	238	NC_006089.5:37785430-37785662	aUCE.1209
NW_009274994.1:6954877-6955153	277	NC_006089.5:38404176-38404453	aUCE.1210
NW_009274994.1:6204129-6204413	285	NC_006089.5:39090789-39091071	aUCE.1211
NW_009274994.1:6189243-6189460	218	NC_006089.5:39105798-39106014	aUCE.1212
NW_009274994.1:6130047-6130313	267	NC_006089.5:39165363-39165628	aUCE.1213
NW_009274994.1:6003071-6003379	309	NC_006089.5:39289674-39289981	aUCE.1214
NW_009274994.1:5912267-5912509	243	NC_006089.5:39378880-39379121	aUCE.1215
NW_009274994.1:5149391-5149607	217	NC_006089.5:40116545-40116758	aUCE.1216
NW_009274994.1:4701269-4701543	275	NC_006089.5:40504802-40505072	aUCE.1217
NW_009274994.1:4674702-4674912	211	NC_006089.5:40529187-40529393	aUCE.1218
NW_009274994.1:4443235-4443531	297	NC_006089.5:40722016-40722231	aUCE.1219
NW_009274994.1:4351705-4352000	296	NC_006089.5:40784796-40785090	aUCE.1220
NW_009274994.1:2136994-2137686	693	NC_006089.5:42581094-42581763	aUCE.1221
NW_009274994.1:1338733-1339069	337	NC_006089.5:43200619-43200953	aUCE.1222
NW_009274994.1:1086665-1086983	319	NC_006089.5:43407429-43407746	aUCE.1223
NW_009271513.1:7884087-7884297	211	NC_006089.5:44556830-44557039	aUCE.1224
NW_009271513.1:7848623-7848932	310	NC_006089.5:44582058-44582366	aUCE.1225
NW_009271513.1:6877848-6878105	258	NC_006089.5:45490216-45490471	aUCE.1226
NW_009270725.1:24760-24962	203	NC_006089.5:4635829-4636027	aUCE.1227
NW_009271513.1:4256933-4257145	213	NC_006089.5:47020695-47020906	aUCE.1228
NW_009271513.1:4300065-4300305	241	NC_006089.5:47067501-47067740	aUCE.1229
NW_009271513.1:4774660-4774878	219	NC_006089.5:47511570-47511786	aUCE.1230
NW_009271513.1:5323861-5324316	456	NC_006089.5:48010256-48010712	aUCE.1231
NW_009271513.1:5834760-5835165	406	NC_006089.5:48488465-48488868	aUCE.1232
NW_009271513.1:5911166-5911449	284	NC_006089.5:48557691-48557967	aUCE.1233
NW_009271513.1:5946507-5946972	466	NC_006089.5:48591343-48591807	aUCE.1234
NW_009271513.1:5972995-5973280	286	NC_006089.5:48617321-48617605	aUCE.1235
NW_009271510.1:3497544-3497793	250	NC_006089.5:49335213-49335461	aUCE.1236
NW_009271510.1:3479677-3479908	232	NC_006089.5:49354309-49354539	aUCE.1237
NW_009271510.1:3418619-3418950	332	NC_006089.5:49412768-49413097	aUCE.1238
NW_009271510.1:3383155-3383407	253	NC_006089.5:49443816-49444067	aUCE.1239
NW_009271510.1:3360913-3361126	214	NC_006089.5:49465397-49465609	aUCE.1240
NW_009271510.1:3325496-3325837	342	NC_006089.5:49498124-49498462	aUCE.1241
NW_009271510.1:3270978-3271184	207	NC_006089.5:49553076-49553281	aUCE.1242
NW_009271510.1:3270654-3270976	323	NC_006089.5:49553284-49553605	aUCE.1243
NW_009271510.1:3253368-3253689	322	NC_006089.5:49571736-49572056	aUCE.1244
NW_009271510.1:3219223-3219536	314	NC_006089.5:49606299-49606610	aUCE.1245
NW_009271510.1:3185428-3185833	406	NC_006089.5:49639305-49639708	aUCE.1246
NW_009271510.1:3160454-3160835	382	NC_006089.5:49662704-49663081	aUCE.1247
NW_009271510.1:3081045-3081390	346	NC_006089.5:49754765-49755101	aUCE.1248
NW_009271510.1:2909897-2910139	243	NC_006089.5:49942510-49942730	aUCE.1249
NW_009271510.1:2688280-2688509	230	NC_006089.5:50138246-50138464	aUCE.1250
NW_009271510.1:2470793-2471003	211	NC_006089.5:50373975-50374182	aUCE.1251
NW_009271510.1:2448591-2448843	253	NC_006089.5:50396045-50396294	aUCE.1252
NW_009271510.1:2328449-2328677	229	NC_006089.5:50514914-50515140	aUCE.1253
NW_009271510.1:2328027-2328349	323	NC_006089.5:50515240-50515531	aUCE.1254
NW_009271510.1:2257795-2258002	208	NC_006089.5:50583150-50583355	aUCE.1255
NW_009271510.1:2127484-2127715	232	NC_006089.5:50704493-50704723	aUCE.1256
NW_009271510.1:2092805-2093038	234	NC_006089.5:50736405-50736635	aUCE.1257
NW_009271510.1:2005301-2005522	222	NC_006089.5:50819522-50819742	aUCE.1258
NW_009271510.1:1935528-1935855	328	NC_006089.5:50885875-50886201	aUCE.1259
NW_009271510.1:1915831-1916302	472	NC_006089.5:50904069-50904537	aUCE.1260
NW_009271510.1:1915349-1915611	263	NC_006089.5:50904758-50905019	aUCE.1261
NW_009271510.1:1883207-1883455	249	NC_006089.5:50936695-50936940	aUCE.1262
NW_009271510.1:1880897-1881106	210	NC_006089.5:50940080-50940287	aUCE.1263
NW_009271510.1:1874901-1875108	208	NC_006089.5:50950827-50951026	aUCE.1264
NW_009270261.1:293647-293852	206	NC_006089.5:5138140-5138344	aUCE.1265
NW_009270261.1:456660-456959	300	NC_006089.5:5279154-5279452	aUCE.1266
NW_009270261.1:495851-496102	252	NC_006089.5:5317375-5317624	aUCE.1267
NW_009270261.1:507887-508091	205	NC_006089.5:5328004-5328207	aUCE.1268
NW_009276906.1:41348-41566	219	NC_006089.5:56801935-56802152	aUCE.1269
NW_009270517.1:17914-18146	233	NC_006089.5:56857982-56858213	aUCE.1270
NW_009271416.1:1173477-1173741	265	NC_006089.5:56896507-56896768	aUCE.1271
NW_009271416.1:1153103-1153463	361	NC_006089.5:56916577-56916933	aUCE.1272
NW_009271416.1:1151103-1151372	270	NC_006089.5:56918685-56918947	aUCE.1273
NW_009271416.1:1145334-1145663	330	NC_006089.5:56924376-56924704	aUCE.1274
NW_009271416.1:1138554-1138797	244	NC_006089.5:56931065-56931307	aUCE.1275
NW_009271416.1:1126177-1126407	231	NC_006089.5:56943362-56943582	aUCE.1276
NW_009271416.1:1125093-1125544	452	NC_006089.5:56944232-56944676	aUCE.1277
NW_009271416.1:1103075-1103370	296	NC_006089.5:56965429-56965722	aUCE.1278
NW_009271416.1:1092312-1092698	387	NC_006089.5:56975299-56975684	aUCE.1279
NW_009271416.1:1071236-1071599	364	NC_006089.5:56992221-56992574	aUCE.1280
NW_009271416.1:1026324-1026558	235	NC_006089.5:57037297-57037530	aUCE.1281
NW_009271416.1:961326-961599	274	NC_006089.5:57105913-57106186	aUCE.1282
NW_009271416.1:955233-955489	257	NC_006089.5:57111796-57112051	aUCE.1283
NW_009271416.1:950910-951543	634	NC_006089.5:57115660-57116290	aUCE.1284
NW_009271416.1:940551-940926	376	NC_006089.5:57124126-57124500	aUCE.1285
NW_009271416.1:911620-911926	307	NC_006089.5:57154652-57154955	aUCE.1286
NW_009271416.1:883415-883749	335	NC_006089.5:57182848-57183181	aUCE.1287
NW_009271416.1:863843-864120	278	NC_006089.5:57202640-57202911	aUCE.1288
NW_009271416.1:842780-843012	233	NC_006089.5:57224873-57225102	aUCE.1289
NW_009271416.1:821235-821648	414	NC_006089.5:57246957-57247369	aUCE.1290
NW_009271416.1:785071-785426	356	NC_006089.5:57284107-57284458	aUCE.1291
NW_009271416.1:777572-778076	505	NC_006089.5:57290028-57290531	aUCE.1292
NW_009271416.1:750656-750986	331	NC_006089.5:57317086-57317415	aUCE.1293
NW_009271416.1:749991-750208	218	NC_006089.5:57317859-57318075	aUCE.1294
NW_009271416.1:727566-727772	207	NC_006089.5:57344081-57344283	aUCE.1295
NW_009271416.1:718003-718339	337	NC_006089.5:57353140-57353475	aUCE.1296
NW_009271416.1:717642-718000	359	NC_006089.5:57353479-57353836	aUCE.1297
NW_009271416.1:694515-694949	435	NC_006089.5:57374342-57374775	aUCE.1298
NW_009271416.1:691366-692154	789	NC_006089.5:57377080-57377861	aUCE.1299
NW_009271416.1:678191-678439	249	NC_006089.5:57392988-57393235	aUCE.1300
NW_009271416.1:659398-659993	596	NC_006089.5:57416926-57417520	aUCE.1301
NW_009271416.1:645627-645840	214	NC_006089.5:57430370-57430576	aUCE.1302
NW_009271416.1:638827-639235	409	NC_006089.5:57436652-57437058	aUCE.1303
NW_009271416.1:595460-595886	427	NC_006089.5:57478767-57479192	aUCE.1304
NW_009271416.1:584361-584594	234	NC_006089.5:57490571-57490803	aUCE.1305
NW_009271416.1:577972-578500	529	NC_006089.5:57496769-57497269	aUCE.1306
NW_009271416.1:555683-555970	288	NC_006089.5:57516883-57517169	aUCE.1307
NW_009271416.1:547789-548034	246	NC_006089.5:57525773-57526015	aUCE.1308
NW_009271416.1:538722-538926	205	NC_006089.5:57532360-57532562	aUCE.1309
NW_009271416.1:538201-538494	294	NC_006089.5:57532794-57533083	aUCE.1310
NW_009271416.1:510047-510534	488	NC_006089.5:57560081-57560567	aUCE.1311
NW_009271416.1:422503-423006	504	NC_006089.5:57651071-57651573	aUCE.1312
NW_009271416.1:421780-422178	399	NC_006089.5:57651900-57652297	aUCE.1313
NW_009276906.1:1716829-1717063	235	NC_006089.5:58043126-58043359	aUCE.1314
NW_009276906.1:1923642-1923844	203	NC_006089.5:58235329-58235526	aUCE.1315
NW_009270261.1:1147289-1147550	262	NC_006089.5:5838704-5838964	aUCE.1316
NW_009270261.1:1215702-1215926	225	NC_006089.5:5898592-5898815	aUCE.1317
NW_009270261.1:1239628-1239873	246	NC_006089.5:5923529-5923771	aUCE.1318
NW_009276906.1:3186796-3187110	315	NC_006089.5:59419295-59419608	aUCE.1319
NW_009276906.1:3331217-3331474	258	NC_006089.5:59630162-59630418	aUCE.1320
NW_009276906.1:3386952-3387240	289	NC_006089.5:59679754-59680040	aUCE.1321
NW_009276906.1:3387815-3388116	302	NC_006089.5:59681095-59681395	aUCE.1322
NW_009276906.1:3391453-3391765	313	NC_006089.5:59685038-59685349	aUCE.1323
NW_009276906.1:3518524-3518742	219	NC_006089.5:59795482-59795699	aUCE.1324
NW_009276906.1:3741153-3741410	258	NC_006089.5:60014861-60015116	aUCE.1325
NW_009276906.1:3743925-3744214	290	NC_006089.5:60017162-60017448	aUCE.1326
NW_009276906.1:3791167-3791453	287	NC_006089.5:60052261-60052546	aUCE.1327
NW_009276906.1:3855167-3855615	449	NC_006089.5:60112746-60113193	aUCE.1328
NW_009276906.1:3855617-3855824	208	NC_006089.5:60113196-60113402	aUCE.1329
NW_009276906.1:3910561-3910781	221	NC_006089.5:60164210-60164427	aUCE.1330
NW_009276906.1:3914652-3914877	226	NC_006089.5:60166650-60166874	aUCE.1331
NW_009270261.1:1345805-1346026	222	NC_006089.5:6022713-6022933	aUCE.1332
NW_009276906.1:4139247-4139487	241	NC_006089.5:60362947-60363182	aUCE.1333
NW_009276906.1:4320601-4321110	510	NC_006089.5:60523855-60524360	aUCE.1334
NW_009276906.1:4325252-4325480	229	NC_006089.5:60528034-60528258	aUCE.1335
NW_009276906.1:4330514-4330790	277	NC_006089.5:60533299-60533575	aUCE.1336
NW_009276906.1:5147050-5147259	210	NC_006089.5:61270576-61270780	aUCE.1337
NW_009271435.1:203676-203881	206	NC_006089.5:61570461-61570665	aUCE.1338
NW_009270261.1:1500527-1500757	231	NC_006089.5:6165281-6165500	aUCE.1339
NW_009271435.1:411910-412126	217	NC_006089.5:61755932-61756147	aUCE.1340
NW_009271435.1:451406-451623	218	NC_006089.5:61791619-61791835	aUCE.1341
NW_009271435.1:2165569-2165774	206	NC_006089.5:63288304-63288469	aUCE.1342
NW_009270261.1:1693255-1693565	311	NC_006089.5:6331552-6331858	aUCE.1343
NW_009271435.1:2203484-2203728	245	NC_006089.5:63319902-63320144	aUCE.1344
NW_009271435.1:2219457-2219859	403	NC_006089.5:63330914-63331312	aUCE.1345
NW_009271435.1:2276330-2276784	455	NC_006089.5:63384573-63385026	aUCE.1346
NW_009271435.1:2302158-2302364	207	NC_006089.5:63408499-63408704	aUCE.1347
NW_009271435.1:2328408-2328614	207	NC_006089.5:63437190-63437393	aUCE.1348
NW_009271435.1:2364007-2364235	229	NC_006089.5:63468418-63468645	aUCE.1349
NW_009271435.1:2364298-2364578	281	NC_006089.5:63468709-63468988	aUCE.1350
NW_009271435.1:2409653-2410212	560	NC_006089.5:63508079-63508637	aUCE.1351
NW_009271435.1:2416687-2416940	254	NC_006089.5:63513990-63514242	aUCE.1352
NW_009271435.1:2512634-2512972	339	NC_006089.5:63605926-63606260	aUCE.1353
NW_009271435.1:2527434-2527691	258	NC_006089.5:63619246-63619502	aUCE.1354
NW_009271435.1:2567600-2567867	268	NC_006089.5:63658457-63658723	aUCE.1355
NW_009271435.1:2623792-2624048	257	NC_006089.5:63713271-63713526	aUCE.1356
NW_009271435.1:2636061-2636393	333	NC_006089.5:63726016-63726347	aUCE.1357
NW_009271435.1:2636858-2637093	236	NC_006089.5:63726836-63727070	aUCE.1358
NW_009271435.1:2637095-2637323	229	NC_006089.5:63727073-63727300	aUCE.1359
NW_009271435.1:2640752-2641133	382	NC_006089.5:63730851-63731231	aUCE.1360
NW_009271435.1:2816221-2816429	209	NC_006089.5:63898745-63898952	aUCE.1361
NW_009271435.1:2840203-2840442	240	NC_006089.5:63922208-63922445	aUCE.1362
NW_009271435.1:2914045-2914456	412	NC_006089.5:63990752-63991162	aUCE.1363
NW_009271435.1:2940683-2940917	235	NC_006089.5:64017102-64017335	aUCE.1364
NW_009271435.1:3221699-3221912	214	NC_006089.5:64269185-64269397	aUCE.1365
NW_009271435.1:3417721-3417979	259	NC_006089.5:64431263-64431510	aUCE.1366
NW_009271435.1:3437827-3438058	232	NC_006089.5:64451620-64451850	aUCE.1367
NW_009271435.1:3669826-3670162	337	NC_006089.5:64644711-64645027	aUCE.1368
NW_009271435.1:3670553-3670852	300	NC_006089.5:64645434-64645742	aUCE.1369
NW_009271435.1:3731851-3732053	203	NC_006089.5:64703908-64704106	aUCE.1370
NW_009271435.1:3854498-3854713	216	NC_006089.5:64811495-64811709	aUCE.1371
NW_009271435.1:3905849-3906053	205	NC_006089.5:64859702-64859903	aUCE.1372
NW_009271435.1:4161761-4161963	203	NC_006089.5:65116128-65116328	aUCE.1373
NW_009271435.1:5050476-5050870	395	NC_006089.5:65938761-65939155	aUCE.1374
NW_009271435.1:5050916-5051203	288	NC_006089.5:65939218-65939504	aUCE.1375
NW_009270261.1:2078697-2078979	283	NC_006089.5:6625196-6625477	aUCE.1376
NW_009271435.1:5659425-5659648	224	NC_006089.5:66459211-66459433	aUCE.1377
NW_009271435.1:5856069-5856312	244	NC_006089.5:66635753-66635994	aUCE.1378
NW_009270261.1:2141514-2141787	274	NC_006089.5:6682897-6683169	aUCE.1379
NW_009271435.1:6088071-6088330	260	NC_006089.5:66854197-66854453	aUCE.1380
NW_009271435.1:6275995-6276343	349	NC_006089.5:67019915-67020260	aUCE.1381
NW_009271435.1:6378193-6378421	229	NC_006089.5:67119609-67119836	aUCE.1382
NW_009271435.1:6410568-6410818	251	NC_006089.5:67149919-67150168	aUCE.1383
NW_009271435.1:6410820-6411104	285	NC_006089.5:67150171-67150454	aUCE.1384
NW_009271435.1:6419298-6419571	274	NC_006089.5:67157953-67158223	aUCE.1385
NW_009271435.1:6788146-6788415	270	NC_006089.5:67479750-67480017	aUCE.1386
NW_009270261.1:2245018-2245224	207	NC_006089.5:6773635-6773840	aUCE.1387
NW_009271096.1:46815-47117	303	NC_006089.5:68134245-68134543	aUCE.1388
NW_009270386.1:723379-723638	260	NC_006089.5:71548267-71548513	aUCE.1389
NW_009270257.1:757056-757322	267	NC_006089.5:75791409-75791673	aUCE.1390
NW_009270487.1:2354598-2354840	243	NC_006089.5:78003705-78003946	aUCE.1391
NW_009271896.1:121315-121607	293	NC_006089.5:8023262-8023550	aUCE.1392
NW_009271711.1:270249-270505	257	NC_006089.5:80671343-80671598	aUCE.1393
NW_009271711.1:321151-321391	241	NC_006089.5:80724006-80724244	aUCE.1394
NW_009271711.1:440380-441130	751	NC_006089.5:80849748-80850498	aUCE.1395
NW_009271896.1:243489-243730	242	NC_006089.5:8131184-8131422	aUCE.1396
NW_009271896.1:289504-289756	253	NC_006089.5:8164927-8165175	aUCE.1397
NW_009271896.1:299505-299996	492	NC_006089.5:8175250-8175733	aUCE.1398
NW_009271639.1:579785-579995	211	NC_006089.5:81833495-81833704	aUCE.1399
NW_009271896.1:347094-347306	213	NC_006089.5:8219166-8219377	aUCE.1400
NW_009271896.1:354789-355008	220	NC_006089.5:8228426-8228644	aUCE.1401
NW_009271896.1:367817-368050	234	NC_006089.5:8241394-8241626	aUCE.1402
NW_009271896.1:423485-423689	205	NC_006089.5:8293309-8293511	aUCE.1403
NW_009271896.1:483640-483857	218	NC_006089.5:8349174-8349382	aUCE.1404
NW_009271896.1:518543-518766	224	NC_006089.5:8379491-8379713	aUCE.1405
NW_009271896.1:527253-527474	222	NC_006089.5:8388598-8388817	aUCE.1406
NW_009271896.1:536226-536447	222	NC_006089.5:8396826-8397044	aUCE.1407
NW_009271896.1:606405-606605	201	NC_006089.5:8460213-8460409	aUCE.1408
NW_009271295.1:874095-874324	230	NC_006089.5:84825213-84825438	aUCE.1409
NW_009271896.1:693552-694042	491	NC_006089.5:8532848-8533337	aUCE.1410
NW_009271896.1:718152-718693	542	NC_006089.5:8553186-8553727	aUCE.1411
NW_009271896.1:718696-718969	274	NC_006089.5:8553731-8554002	aUCE.1412
NW_009271295.1:2133727-2133987	261	NC_006089.5:85973906-85974164	aUCE.1413
NW_009271295.1:2185196-2185438	243	NC_006089.5:86015581-86015822	aUCE.1414
NW_009271295.1:2211876-2212233	358	NC_006089.5:86042254-86042610	aUCE.1415
NW_009271295.1:2218615-2218834	220	NC_006089.5:86048551-86048716 (Blat hit)	aUCE.1416
NW_009271295.1:2227523-2227919	397	NC_006089.5:86056866-86057261	aUCE.1417
NW_009271295.1:2366163-2366583	421	NC_006089.5:86193224-86193627	aUCE.1418
NW_009271295.1:2366759-2367029	271	NC_006089.5:86193804-86194073	aUCE.1419
NW_009271295.1:2375371-2375763	393	NC_006089.5:86202910-86203300	aUCE.1420
NW_009271295.1:2384231-2384551	321	NC_006089.5:86213284-86213602	aUCE.1421
NW_009271896.1:805992-806202	211	NC_006089.5:8622910-8623104	aUCE.1422
NW_009271295.1:2434289-2434503	215	NC_006089.5:86260085-86260298	aUCE.1423
NW_009271295.1:2446269-2446677	409	NC_006089.5:86270812-86271218	aUCE.1424
NW_009271295.1:2506042-2506301	260	NC_006089.5:86328676-86328934	aUCE.1425
NW_009271295.1:2654996-2655376	381	NC_006089.5:86481060-86481440	aUCE.1426
NW_009271295.1:2663362-2663607	246	NC_006089.5:86488269-86488513	aUCE.1427
NW_009271295.1:2668719-2669071	353	NC_006089.5:86494129-86494480	aUCE.1428
NW_009271295.1:2706464-2706666	203	NC_006089.5:86522283-86522484	aUCE.1429
NW_009271295.1:2721319-2721602	284	NC_006089.5:86534267-86534549	aUCE.1430
NW_009271295.1:2797256-2797712	457	NC_006089.5:86605953-86606407	aUCE.1431
NW_009271295.1:2798390-2798648	259	NC_006089.5:86607084-86607341	aUCE.1432
NW_009271896.1:851863-852112	250	NC_006089.5:8661873-8662119	aUCE.1433
NW_009271295.1:2840978-2841295	318	NC_006089.5:86651306-86651620	aUCE.1434
NW_009271295.1:2864035-2864247	213	NC_006089.5:86674204-86674413	aUCE.1435
NW_009271295.1:2875556-2875762	207	NC_006089.5:86685664-86685869	aUCE.1436
NW_009271295.1:2914788-2915003	216	NC_006089.5:86729168-86729382	aUCE.1437
NW_009271295.1:2962287-2962652	366	NC_006089.5:86777252-86777616	aUCE.1438
NW_009271295.1:3019216-3019476	261	NC_006089.5:86832248-86832507	aUCE.1439
NW_009271295.1:3021339-3021615	277	NC_006089.5:86834207-86834446	aUCE.1440
NW_009271295.1:3029451-3029736	286	NC_006089.5:86841634-86841910	aUCE.1441
NW_009271295.1:3037859-3038192	334	NC_006089.5:86850860-86851189	aUCE.1442
NW_009271295.1:3058070-3058935	866	NC_006089.5:86870784-86871647	aUCE.1443
NW_009271295.1:3058937-3059185	249	NC_006089.5:86871651-86871897	aUCE.1444
NW_009271295.1:3092660-3092867	208	NC_006089.5:86901176-86901382	aUCE.1445
NW_009271295.1:3092869-3093185	317	NC_006089.5:86901385-86901700	aUCE.1446
NW_009271295.1:3093187-3093582	396	NC_006089.5:86901703-86902097	aUCE.1447
NW_009271295.1:3179099-3179499	401	NC_006089.5:86980723-86981122	aUCE.1448
NW_009271295.1:3216448-3216800	353	NC_006089.5:87015423-87015774	aUCE.1449
NW_009271295.1:3216802-3217012	211	NC_006089.5:87015777-87015986	aUCE.1450
NW_009271295.1:3262723-3263140	418	NC_006089.5:87059625-87060041	aUCE.1451
NW_009271295.1:3263588-3263906	319	NC_006089.5:87060490-87060807	aUCE.1452
NW_009271295.1:3263973-3264253	281	NC_006089.5:87060875-87061151	aUCE.1453
NW_009271295.1:3315659-3315859	201	NC_006089.5:87109078-87109243	aUCE.1454
NW_009271295.1:3315913-3316139	227	NC_006089.5:87109381-87109585	aUCE.1455
NW_009271295.1:3329374-3329633	260	NC_006089.5:87121464-87121715	aUCE.1456
NW_009271295.1:3330683-3330912	230	NC_006089.5:87122762-87122990	aUCE.1457
NW_009271295.1:3337766-3338000	235	NC_006089.5:87129960-87130193	aUCE.1458
NW_009271295.1:3350903-3351263	361	NC_006089.5:87139375-87139734	aUCE.1459
NW_009271295.1:3460820-3461082	263	NC_006089.5:87251775-87252037	aUCE.1460
NW_009271295.1:3488571-3488826	256	NC_006089.5:87281526-87281780	aUCE.1461
NW_009271295.1:3660462-3660690	229	NC_006089.5:87460175-87460400	aUCE.1462
NW_009271295.1:3804727-3804936	210	NC_006089.5:87590140-87590348	aUCE.1463
NW_009271295.1:3925913-3926287	375	NC_006089.5:87694422-87694795	aUCE.1464
NW_009271295.1:3955840-3956152	313	NC_006089.5:87719913-87720224	aUCE.1465
NW_009271740.1:428882-429098	217	NC_006089.5:88737036-88737251	aUCE.1466
NW_009271731.1:332551-332754	204	NC_006089.5:89374680-89374880	aUCE.1467
NW_009270225.1:207959-208228	270	NC_006089.5:89713276-89713544	aUCE.1468
NW_009271896.1:1217055-1217271	217	NC_006089.5:8973285-8973499	aUCE.1469
NW_009271896.1:1218107-1218681	575	NC_006089.5:8974393-8974963	aUCE.1470
NW_009271896.1:1221740-1221958	219	NC_006089.5:8977914-8978131	aUCE.1471
NW_009270794.1:227840-228040	201	NC_006089.5:90711036-90711232	aUCE.1472
NW_009271896.1:1325528-1325761	234	NC_006089.5:9074215-9074447	aUCE.1473
NW_009270794.1:467249-467515	267	NC_006089.5:90942931-90943196	aUCE.1474
NW_009270794.1:471906-472212	307	NC_006089.5:90947133-90947437	aUCE.1475
NW_009270794.1:491865-492099	235	NC_006089.5:90965335-90965568	aUCE.1476
NW_009270794.1:492101-492303	203	NC_006089.5:90965571-90965759	aUCE.1477
NW_009270794.1:609967-610220	254	NC_006089.5:91082342-91082594	aUCE.1478
NW_009270794.1:634014-634431	418	NC_006089.5:91107217-91107633	aUCE.1479
NW_009270794.1:644212-644441	230	NC_006089.5:91116871-91117097	aUCE.1480
NW_009270794.1:648555-648771	217	NC_006089.5:91120824-91121039	aUCE.1481
NW_009270794.1:687882-688127	246	NC_006089.5:91157203-91157450	aUCE.1482
NW_009270794.1:691512-692103	592	NC_006089.5:91160770-91161359	aUCE.1483
NW_009270794.1:713269-713482	214	NC_006089.5:91181605-91181817	aUCE.1484
NW_009270794.1:764536-764747	212	NC_006089.5:91233644-91233849	aUCE.1485
NW_009270794.1:767938-768162	225	NC_006089.5:91237211-91237434	aUCE.1486
NW_009270794.1:809512-809961	450	NC_006089.5:91277581-91278028	aUCE.1487
NW_009270794.1:811808-812099	292	NC_006089.5:91279853-91280143	aUCE.1488
NW_009270794.1:816205-816445	241	NC_006089.5:91284380-91284616	aUCE.1489
NW_009270794.1:823531-823747	217	NC_006089.5:91291065-91291280	aUCE.1490
NW_009270794.1:824036-824491	456	NC_006089.5:91291386-91291840	aUCE.1491
NW_009270794.1:824785-824989	205	NC_006089.5:91292131-91292334	aUCE.1492
NW_009270794.1:860111-860535	425	NC_006089.5:91325334-91325742	aUCE.1493
NW_009270794.1:871954-872257	304	NC_006089.5:91338083-91338383	aUCE.1494
NW_009270794.1:880434-880947	514	NC_006089.5:91346453-91346965	aUCE.1495
NW_009270794.1:886255-886468	214	NC_006089.5:91352147-91352347	aUCE.1496
NW_009270794.1:905664-905966	303	NC_006089.5:91371253-91371554	aUCE.1497
NW_009270794.1:910028-910405	378	NC_006089.5:91375485-91375858	aUCE.1498
NW_009270794.1:914086-914336	251	NC_006089.5:91379604-91379853	aUCE.1499
NW_009270794.1:920003-920308	306	NC_006089.5:91385514-91385818	aUCE.1500
NW_009270794.1:920647-920859	213	NC_006089.5:91386167-91386367	aUCE.1501
NW_009270794.1:935802-936084	283	NC_006089.5:91398398-91398680	aUCE.1502
NW_009270794.1:936620-936885	266	NC_006089.5:91399177-91399441	aUCE.1503
NW_009270794.1:938348-938646	299	NC_006089.5:91400966-91401258	aUCE.1504
NW_009271896.1:1396969-1397171	203	NC_006089.5:9140319-9140520	aUCE.1505
NW_009270794.1:951152-951353	202	NC_006089.5:91412771-91412971	aUCE.1506
NW_009270794.1:968790-969058	269	NC_006089.5:91430150-91430414	aUCE.1507
NW_009270794.1:994454-994969	516	NC_006089.5:91451327-91451837	aUCE.1508
NW_009270794.1:1008680-1009071	392	NC_006089.5:91461861-91462251	aUCE.1509
NW_009270794.1:1011001-1011246	246	NC_006089.5:91464213-91464457	aUCE.1510
NW_009270794.1:1018504-1018868	365	NC_006089.5:91471588-91471951	aUCE.1511
NW_009270794.1:1049013-1049258	246	NC_006089.5:91500537-91500781	aUCE.1512
NW_009270794.1:1062926-1063395	470	NC_006089.5:91511972-91512432	aUCE.1513
NW_009270794.1:1126801-1127431	631	NC_006089.5:91575578-91576207	aUCE.1514
NW_009270794.1:1155137-1155568	432	NC_006089.5:91600782-91601212	aUCE.1515
NW_009270794.1:1155878-1156090	213	NC_006089.5:91601531-91601742	aUCE.1516
NW_009270794.1:1172751-1173451	701	NC_006089.5:91616952-91617651	aUCE.1517
NW_009270794.1:1173507-1173942	436	NC_006089.5:91617706-91618140	aUCE.1518
NW_009270794.1:1210684-1210903	220	NC_006089.5:91655904-91656122	aUCE.1519
NW_009270794.1:1212712-1212989	278	NC_006089.5:91657692-91657968	aUCE.1520
NW_009270794.1:1214344-1214668	325	NC_006089.5:91659281-91659604	aUCE.1521
NW_009270794.1:1214857-1215338	482	NC_006089.5:91659794-91660274	aUCE.1522
NW_009270794.1:1240252-1240473	222	NC_006089.5:91680987-91681206	aUCE.1523
NW_009270794.1:1282161-1282414	254	NC_006089.5:91723163-91723415	aUCE.1524
NW_009270794.1:1303268-1303671	404	NC_006089.5:91744503-91744903	aUCE.1525
NW_009270794.1:1304265-1304561	297	NC_006089.5:91745462-91745757	aUCE.1526
NW_009270794.1:1305944-1306171	228	NC_006089.5:91747150-91747376	aUCE.1527
NW_009270794.1:1306246-1306491	246	NC_006089.5:91747452-91747696	aUCE.1528
NW_009270794.1:1316016-1316820	805	NC_006089.5:91757037-91757839	aUCE.1529
NW_009270794.1:1317635-1317911	277	NC_006089.5:91758633-91758908	aUCE.1530
NW_009270794.1:1321034-1321477	444	NC_006089.5:91762223-91762665	aUCE.1531
NW_009270794.1:1323435-1323792	358	NC_006089.5:91764722-91765075	aUCE.1532
NW_009270794.1:1327652-1327861	210	NC_006089.5:91768655-91768863	aUCE.1533
NW_009270794.1:1330452-1330681	230	NC_006089.5:91771305-91771533	aUCE.1534
NW_009270794.1:1331387-1331755	369	NC_006089.5:91772245-91772612	aUCE.1535
NW_009271896.1:1440646-1440887	242	NC_006089.5:9180612-9180852	aUCE.1536
NW_009270205.1:2398386-2398640	255	NC_006089.5:92739838-92740091	aUCE.1537
NW_009270205.1:1513707-1513917	211	NC_006089.5:93533156-93533364	aUCE.1538
NW_009272072.1:1844390-1844590	201	NC_006089.5:97042640-97042838	aUCE.1539
NW_009272072.1:2201741-2201978	238	NC_006089.5:97337060-97337296	aUCE.1540
NW_009270563.1:5921194-5921510	317	NC_006089.5:98963505-98963820	aUCE.1541
NW_009271896.1:2360518-2360770	253	NC_006089.5:9978802-9979052	aUCE.1542
NW_009271896.1:2361252-2361453	202	NC_006089.5:9979564-9979760	aUCE.1543
NW_009271590.1:234224-234509	286	NC_006090.5:100485029-100485313	aUCE.1544
NW_009271590.1:107154-107385	232	NC_006090.5:100605098-100605326	aUCE.1545
NW_009271590.1:78326-78542	217	NC_006090.5:100634494-100634708	aUCE.1546
NW_009271590.1:67688-67936	249	NC_006090.5:100643711-100643958	aUCE.1547
NW_009270285.1:1071261-1071532	272	NC_006090.5:100751535-100751805	aUCE.1548
NW_009270285.1:1063636-1063933	298	NC_006090.5:100758119-100758410	aUCE.1549
NW_009270285.1:761793-762108	316	NC_006090.5:101055042-101055355	aUCE.1550
NW_009270285.1:645305-645667	363	NC_006090.5:101160130-101160490	aUCE.1551
NW_009270285.1:559115-559332	218	NC_006090.5:101243961-101244176	aUCE.1552
NW_009270285.1:473535-473747	213	NC_006090.5:101327844-101328055	aUCE.1553
NW_009270285.1:167283-167485	203	NC_006090.5:101577152-101577349	aUCE.1554
NW_009270285.1:126203-126502	300	NC_006090.5:101614826-101615122	aUCE.1555
NW_009270292.1:421092-421307	216	NC_006090.5:102054519-102054732	aUCE.1556
NW_009270292.1:447316-447532	217	NC_006090.5:102079020-102079236	aUCE.1557
NW_009270292.1:477645-477892	248	NC_006090.5:102105004-102105248	aUCE.1558
NW_009270292.1:486698-486993	296	NC_006090.5:102113818-102114112	aUCE.1559
NW_009270292.1:519086-519438	353	NC_006090.5:102146641-102146991	aUCE.1560
NW_009270292.1:519440-519692	253	NC_006090.5:102146994-102147245	aUCE.1561
NW_009270292.1:553523-553775	253	NC_006090.5:102182590-102182838	aUCE.1562
NW_009270292.1:705673-705904	232	NC_006090.5:102309523-102309753	aUCE.1563
NW_009270292.1:761850-762055	206	NC_006090.5:102366543-102366745	aUCE.1564
NW_009270292.1:880470-880692	223	NC_006090.5:102484331-102484540	aUCE.1565
NW_009271075.1:2480034-2480269	236	NC_006090.5:1029961-1030193	aUCE.1566
NW_009272082.1:1454564-1454776	213	NC_006090.5:103170754-103170965	aUCE.1567
NW_009272082.1:1413485-1413700	216	NC_006090.5:103209386-103209597	aUCE.1568
NW_009272082.1:1399324-1399593	270	NC_006090.5:103222183-103222448	aUCE.1569
NW_009272082.1:1366576-1366783	208	NC_006090.5:103258643-103258846	aUCE.1570
NW_009272082.1:805875-806213	339	NC_006090.5:103829261-103829597	aUCE.1571
NW_009272082.1:753391-753750	360	NC_006090.5:103883615-103883973	aUCE.1572
NW_009272082.1:672401-672658	258	NC_006090.5:103966316-103966572	aUCE.1573
NW_009272102.1:2298074-2298275	202	NC_006090.5:10409882-10410082	aUCE.1574
NW_009272102.1:2323850-2324124	275	NC_006090.5:10425854-10426125	aUCE.1575
NW_009270496.1:77059-77304	246	NC_006090.5:104415614-104415858	aUCE.1576
NW_009272102.1:2521685-2521964	280	NC_006090.5:10575392-10575670	aUCE.1577
NW_009272102.1:2522483-2522738	256	NC_006090.5:10576147-10576405	aUCE.1578
NW_009270557.1:1531073-1531286	214	NC_006090.5:106201715-106201911	aUCE.1579
NW_009270557.1:1526071-1526577	507	NC_006090.5:106206412-106206915	aUCE.1580
NW_009271075.1:2518828-2519059	232	NC_006090.5:1064683-1064912	aUCE.1581
NW_009270557.1:1184911-1185174	264	NC_006090.5:106507065-106507326	aUCE.1582
NW_009270557.1:1152089-1152405	317	NC_006090.5:106536540-106536852	aUCE.1583
NW_009270557.1:1125670-1125895	226	NC_006090.5:106564107-106564331	aUCE.1584
NW_009270557.1:1058323-1058574	252	NC_006090.5:106622856-106623101	aUCE.1585
NW_009270557.1:809374-809612	239	NC_006090.5:106846048-106846285	aUCE.1586
NW_009270557.1:705224-705473	250	NC_006090.5:106943221-106943469	aUCE.1587
NW_009272102.1:2734837-2735067	231	NC_006090.5:10749805-10750034	aUCE.1588
NW_009271318.1:435630-435852	223	NC_006090.5:107779476-107779697	aUCE.1589
NW_009271318.1:443275-443564	290	NC_006090.5:107787874-107788164	aUCE.1590
NW_009271318.1:684623-684842	220	NC_006090.5:107999450-107999668	aUCE.1591
NW_009271318.1:705884-706274	391	NC_006090.5:108021107-108021495	aUCE.1592
NW_009271318.1:740872-741126	255	NC_006090.5:108049750-108050001	aUCE.1593
NW_009271318.1:767875-768121	247	NC_006090.5:108072683-108072928	aUCE.1594
NW_009271318.1:775613-775855	243	NC_006090.5:108079988-108080229	aUCE.1595
NW_009271318.1:788122-788344	223	NC_006090.5:108093496-108093717	aUCE.1596
NW_009272102.1:2816125-2816460	336	NC_006090.5:10820256-10820590	aUCE.1597
NW_009271318.1:920250-920594	345	NC_006090.5:108222763-108223106	aUCE.1598
NW_009271318.1:930386-930624	239	NC_006090.5:108231936-108232173	aUCE.1599
NW_009271318.1:936914-937147	234	NC_006090.5:108238191-108238423	aUCE.1600
NW_009271318.1:942425-942699	275	NC_006090.5:108243699-108243972	aUCE.1601
NW_009271318.1:945200-945403	204	NC_006090.5:108246496-108246698	aUCE.1602
NW_009271318.1:1011385-1011758	374	NC_006090.5:108308275-108308646	aUCE.1603
NW_009271318.1:1011983-1012373	391	NC_006090.5:108308934-108309323	aUCE.1604
NW_009271318.1:1016072-1016596	525	NC_006090.5:108313135-108313655	aUCE.1605
NW_009271318.1:1017029-1017276	248	NC_006090.5:108314091-108314337	aUCE.1606
NW_009271318.1:1019636-1019882	247	NC_006090.5:108316937-108317147	aUCE.1607
NW_009271318.1:1069522-1069771	250	NC_006090.5:108367911-108368159	aUCE.1608
NW_009271318.1:1086069-1086428	360	NC_006090.5:108379601-108379958	aUCE.1609
NW_009271318.1:1086755-1086992	238	NC_006090.5:108380295-108380531	aUCE.1610
NW_009271318.1:1127265-1127739	475	NC_006090.5:108413558-108414018	aUCE.1611
NW_009272102.1:2842546-2842999	454	NC_006090.5:10844147-10844599	aUCE.1612
NW_009271318.1:1166116-1166367	252	NC_006090.5:108444959-108445209	aUCE.1613
NW_009271318.1:1274134-1274567	434	NC_006090.5:108544238-108544670	aUCE.1614
NW_009272102.1:2859827-2860267	441	NC_006090.5:10859196-10859635	aUCE.1615
NW_009271318.1:1336685-1336887	203	NC_006090.5:108598916-108599117	aUCE.1616
NW_009272102.1:2861334-2861751	418	NC_006090.5:10860684-10861097	aUCE.1617
NW_009271318.1:1373191-1373425	235	NC_006090.5:108634644-108634877	aUCE.1618
NW_009272102.1:2900420-2900732	313	NC_006090.5:10895218-10895528	aUCE.1619
NW_009270649.1:2003892-2004300	409	NC_006090.5:108975235-108975642	aUCE.1620
NW_009270649.1:1976931-1977191	261	NC_006090.5:109002423-109002680	aUCE.1621
NW_009272102.1:2916357-2916821	465	NC_006090.5:10909601-10910061	aUCE.1622
NW_009270649.1:1868566-1868859	294	NC_006090.5:109101798-109102090	aUCE.1623
NW_009272102.1:2928683-2928941	259	NC_006090.5:10920431-10920688	aUCE.1624
NW_009270649.1:1713656-1713978	323	NC_006090.5:109239815-109240135	aUCE.1625
NW_009270649.1:1708090-1708300	211	NC_006090.5:109245713-109245922	aUCE.1626
NW_009272102.1:2936538-2936810	273	NC_006090.5:10927333-10927602	aUCE.1627
NW_009270649.1:1650716-1650977	262	NC_006090.5:109290204-109290462	aUCE.1628
NW_009270649.1:1649776-1650038	263	NC_006090.5:109291038-109291292	aUCE.1629
NW_009270649.1:1633976-1634227	252	NC_006090.5:109305824-109306065	aUCE.1630
NW_009270649.1:1529366-1529593	228	NC_006090.5:109409734-109409960	aUCE.1631
NW_009270649.1:1494264-1494500	237	NC_006090.5:109442680-109442915	aUCE.1632
NW_009270649.1:1385172-1385420	249	NC_006090.5:109548701-109548947	aUCE.1633
NW_009272102.1:2992043-2992365	323	NC_006090.5:10979461-10979782	aUCE.1634
NW_009270649.1:503343-503564	222	NC_006090.5:110053084-110053305	aUCE.1635
NW_009270713.1:8769966-8770274	309	NC_006090.5:110070-110377	aUCE.1636
NW_009272102.1:3024028-3024415	388	NC_006090.5:11013307-11013693	aUCE.1637
NW_009271075.1:2554355-2554584	230	NC_006090.5:1102174-1102395	aUCE.1638
NW_009270649.1:708359-708618	260	NC_006090.5:110220160-110220418	aUCE.1639
NW_009272102.1:3040976-3041211	236	NC_006090.5:11028803-11029034	aUCE.1640
NW_009272102.1:3063879-3064220	342	NC_006090.5:11048621-11048961	aUCE.1641
NW_009272102.1:3076101-3076318	218	NC_006090.5:11059694-11059910	aUCE.1642
NW_009272102.1:3077717-3077922	206	NC_006090.5:11061173-11061375	aUCE.1643
NW_009272102.1:3113332-3113583	252	NC_006090.5:11088831-11089082	aUCE.1644
NW_009272102.1:3139588-3140119	532	NC_006090.5:11103832-11104325	aUCE.1645
NW_009272102.1:3166118-3166379	262	NC_006090.5:11128409-11128669	aUCE.1646
NW_009272102.1:3168466-3168714	249	NC_006090.5:11130719-11130965	aUCE.1647
NW_009272102.1:3214340-3214632	293	NC_006090.5:11174938-11175229	aUCE.1648
NW_009272102.1:3214634-3214848	215	NC_006090.5:11175232-11175445	aUCE.1649
NW_009272102.1:3221536-3221797	262	NC_006090.5:11181147-11181295	aUCE.1650
NW_009272102.1:3274244-3274464	221	NC_006090.5:11229481-11229702	aUCE.1651
NW_009272102.1:3274467-3274775	309	NC_006090.5:11229706-11230010	aUCE.1652
NW_009272102.1:3277514-3277831	318	NC_006090.5:11232569-11232885	aUCE.1653
NW_009272102.1:3280450-3280650	201	NC_006090.5:11235586-11235785	aUCE.1654
NW_009272102.1:3283189-3283719	531	NC_006090.5:11237954-11238489	aUCE.1655
NW_009272102.1:3286606-3286810	205	NC_006090.5:11240972-11241173	aUCE.1656
NW_009271075.1:2578889-2579391	503	NC_006090.5:1124713-1125214	aUCE.1657
NW_009272102.1:3295697-3295898	202	NC_006090.5:11248855-11249055	aUCE.1658
NW_009271075.1:2581202-2581591	390	NC_006090.5:1126915-1127303	aUCE.1659
NW_009271075.1:2591207-2591509	303	NC_006090.5:1134107-1134405	aUCE.1660
NW_009272102.1:3433419-3433651	233	NC_006090.5:11383689-11383919	aUCE.1661
NW_009272102.1:3443079-3443280	202	NC_006090.5:11392910-11393110	aUCE.1662
NW_009272102.1:3445461-3445703	243	NC_006090.5:11395416-11395655	aUCE.1663
NW_009272102.1:3446012-3446537	526	NC_006090.5:11396013-11396537	aUCE.1664
NW_009272102.1:3448852-3449123	272	NC_006090.5:11398415-11398685	aUCE.1665
NW_009271075.1:2603020-2603398	379	NC_006090.5:1146218-1146595	aUCE.1666
NW_009272102.1:3549295-3549554	260	NC_006090.5:11488555-11488813	aUCE.1667
NW_009272102.1:3580088-3580408	321	NC_006090.5:11518468-11518785	aUCE.1668
NW_009272102.1:3583074-3583360	287	NC_006090.5:11521395-11521680	aUCE.1669
NW_009272102.1:3635241-3635519	279	NC_006090.5:11570712-11570988	aUCE.1670
NW_009272102.1:3652074-3652307	234	NC_006090.5:11587677-11587909	aUCE.1671
NW_009272102.1:3757623-3758047	425	NC_006090.5:11685592-11686015	aUCE.1672
NW_009271075.1:2665442-2665803	362	NC_006090.5:1199434-1199793	aUCE.1673
NW_009271075.1:2693041-2693244	204	NC_006090.5:1223358-1223560	aUCE.1674
NW_009271075.1:2738755-2739103	349	NC_006090.5:1256601-1256947	aUCE.1675
NW_009271075.1:2750813-2751191	379	NC_006090.5:1268654-1269023	aUCE.1676
NW_009271075.1:2763759-2764259	501	NC_006090.5:1281547-1282046	aUCE.1677
NW_009271075.1:2803066-2803302	237	NC_006090.5:1315112-1315347	aUCE.1678
NW_009271075.1:6687503-6687712	210	NC_006090.5:13396660-13396868	aUCE.1679
NW_009271075.1:2830597-2830829	233	NC_006090.5:1341036-1341267	aUCE.1680
NW_009271075.1:2835391-2835677	287	NC_006090.5:1345750-1346029	aUCE.1681
NW_009271075.1:2835949-2836357	409	NC_006090.5:1346304-1346711	aUCE.1682
NW_009271075.1:2862401-2862618	218	NC_006090.5:1369605-1369821	aUCE.1683
NW_009271075.1:2868483-2868832	350	NC_006090.5:1374645-1374990	aUCE.1684
NW_009271075.1:6278983-6279547	565	NC_006090.5:13763823-13764388	aUCE.1685
NW_009271075.1:2878381-2878614	234	NC_006090.5:1384915-1385147	aUCE.1686
NW_009271075.1:2978413-2978797	385	NC_006090.5:1469711-1470087	aUCE.1687
NW_009271075.1:4866553-4866960	408	NC_006090.5:14885899-14886301	aUCE.1688
NW_009271075.1:4782842-4783053	212	NC_006090.5:14955848-14956058	aUCE.1689
NW_009271075.1:4711533-4711789	257	NC_006090.5:15018775-15019029	aUCE.1690
NW_009271075.1:4686737-4686963	227	NC_006090.5:15043942-15044167	aUCE.1691
NW_009271075.1:3023102-3023372	271	NC_006090.5:1513407-1513676	aUCE.1692
NW_009271075.1:4572927-4573151	225	NC_006090.5:15146342-15146565	aUCE.1693
NW_009271075.1:4535922-4536138	217	NC_006090.5:15178181-15178390	aUCE.1694
NW_009271075.1:4479008-4479308	301	NC_006090.5:15220218-15220517	aUCE.1695
NW_009271075.1:4375965-4376207	243	NC_006090.5:15305393-15305632	aUCE.1696
NW_009271075.1:4278995-4279261	267	NC_006090.5:15381931-15382196	aUCE.1697
NW_009271075.1:3073150-3073352	203	NC_006090.5:1556223-1556419	aUCE.1698
NW_009271075.1:3116066-3116575	510	NC_006090.5:1587217-1587716	aUCE.1699
NW_009271075.1:3123561-3123838	278	NC_006090.5:1592808-1593084	aUCE.1700
NW_009271075.1:3135436-3135671	236	NC_006090.5:1599041-1599275	aUCE.1701
NW_009271075.1:3139114-3139735	622	NC_006090.5:1602381-1603000	aUCE.1702
NW_009271075.1:3181851-3182056	206	NC_006090.5:1634978-1635182	aUCE.1703
NW_009271075.1:3182329-3182544	216	NC_006090.5:1635567-1635780	aUCE.1704
NW_009271075.1:3202445-3202671	227	NC_006090.5:1652976-1653200	aUCE.1705
NW_009271075.1:3221166-3221504	339	NC_006090.5:1668454-1668788	aUCE.1706
NW_009271075.1:3221550-3221960	411	NC_006090.5:1668836-1669243	aUCE.1707
NW_009271075.1:3235407-3235627	221	NC_006090.5:1678008-1678227	aUCE.1708
NW_009271075.1:3238398-3238824	427	NC_006090.5:1679690-1680111	aUCE.1709
NW_009271075.1:3249746-3250044	299	NC_006090.5:1690556-1690853	aUCE.1710
NW_009271075.1:3275194-3275453	260	NC_006090.5:1709065-1709312	aUCE.1711
NW_009271075.1:3282533-3282956	424	NC_006090.5:1716042-1716464	aUCE.1712
NW_009271075.1:3312657-3312867	211	NC_006090.5:1745226-1745434	aUCE.1713
NW_009271075.1:3313138-3313360	223	NC_006090.5:1745706-1745927	aUCE.1714
NW_009270291.1:1367888-1368130	243	NC_006090.5:17464004-17464242	aUCE.1715
NW_009270291.1:1665845-1666077	233	NC_006090.5:17638329-17638554	aUCE.1716
NW_009271075.1:3335840-3336196	357	NC_006090.5:1765125-1765480	aUCE.1717
NW_009271075.1:3350322-3350568	247	NC_006090.5:1776672-1776915	aUCE.1718
NW_009271075.1:3392817-3393336	520	NC_006090.5:1806901-1807419	aUCE.1719
NW_009271075.1:3404631-3404893	263	NC_006090.5:1814965-1815221	aUCE.1720
NW_009271075.1:3426709-3427139	431	NC_006090.5:1830539-1830965	aUCE.1721
NW_009270713.1:8049219-8049529	311	NC_006090.5:18533771-18534080	aUCE.1722
NW_009270713.1:8011737-8012062	326	NC_006090.5:18568677-18569019	aUCE.1723
NW_009270713.1:7902436-7902656	221	NC_006090.5:18670753-18670969	aUCE.1724
NW_009270713.1:7854619-7854852	234	NC_006090.5:18705300-18705531	aUCE.1725
NW_009270713.1:7787520-7787794	275	NC_006090.5:18751350-18751623	aUCE.1726
NW_009271075.1:3506151-3506466	316	NC_006090.5:1875547-1875857	aUCE.1727
NW_009271075.1:3506470-3506719	250	NC_006090.5:1875899-1876146	aUCE.1728
NW_009270713.1:7255832-7256090	259	NC_006090.5:19193137-19193394	aUCE.1729
NW_009271075.1:3587535-3587887	353	NC_006090.5:1933940-1934290	aUCE.1730
NW_009270713.1:6990587-6990806	220	NC_006090.5:19421594-19421794	aUCE.1731
NW_009270713.1:6957233-6957610	378	NC_006090.5:19451168-19451546	aUCE.1732
NW_009270713.1:6822450-6823064	615	NC_006090.5:19569506-19570113	aUCE.1733
NW_009270713.1:6771928-6772185	258	NC_006090.5:19610052-19610301	aUCE.1734
NW_009270713.1:6725630-6725852	223	NC_006090.5:19651724-19651945	aUCE.1735
NW_009270713.1:6718614-6719272	659	NC_006090.5:19657135-19657791	aUCE.1736
NW_009270713.1:6695672-6695933	262	NC_006090.5:19674994-19675254	aUCE.1737
NW_009270713.1:6673902-6674140	239	NC_006090.5:19694331-19694568	aUCE.1738
NW_009270713.1:6648788-6649081	294	NC_006090.5:19714591-19714884	aUCE.1739
NW_009270713.1:6636122-6636407	286	NC_006090.5:19725915-19726199	aUCE.1740
NW_009270713.1:6635882-6636117	236	NC_006090.5:19726205-19726439	aUCE.1741
NW_009270713.1:6603394-6603631	238	NC_006090.5:19754430-19754661	aUCE.1742
NW_009270713.1:6589514-6589750	237	NC_006090.5:19768928-19769160	aUCE.1743
NW_009270713.1:6576733-6577036	304	NC_006090.5:19782444-19782740	aUCE.1744
NW_009270713.1:6566260-6566533	274	NC_006090.5:19791008-19791277	aUCE.1745
NW_009270713.1:6552732-6552944	213	NC_006090.5:19802199-19802407	aUCE.1746
NW_009270713.1:6550253-6550518	266	NC_006090.5:19804472-19804733	aUCE.1747
NW_009270713.1:6526447-6526718	272	NC_006090.5:19824501-19824771	aUCE.1748
NW_009270713.1:6523135-6523396	262	NC_006090.5:19827703-19827963	aUCE.1749
NW_009270713.1:6462429-6462704	276	NC_006090.5:19876119-19876392	aUCE.1750
NW_009270713.1:6454077-6454415	339	NC_006090.5:19881694-19882029	aUCE.1751
NW_009270713.1:6441439-6441652	214	NC_006090.5:19893003-19893215	aUCE.1752
NW_009270713.1:6406175-6406400	226	NC_006090.5:19918008-19918232	aUCE.1753
NW_009270713.1:6371391-6371809	419	NC_006090.5:19948573-19948990	aUCE.1754
NW_009270713.1:6304938-6305315	378	NC_006090.5:20011291-20011667	aUCE.1755
NW_009270713.1:6300225-6300455	231	NC_006090.5:20016069-20016287	aUCE.1756
NW_009270713.1:6234350-6234603	254	NC_006090.5:20072690-20072942	aUCE.1757
NW_009270713.1:6204653-6204947	295	NC_006090.5:20100801-20101093	aUCE.1758
NW_009270713.1:6198577-6198885	309	NC_006090.5:20106636-20106943	aUCE.1759
NW_009270713.1:6185948-6186216	269	NC_006090.5:20118497-20118761	aUCE.1760
NW_009270713.1:6123280-6123496	217	NC_006090.5:20175536-20175751	aUCE.1761
NW_009270713.1:6103687-6103964	278	NC_006090.5:20194306-20194572	aUCE.1762
NW_009270713.1:6065340-6065570	231	NC_006090.5:20230209-20230438	aUCE.1763
NW_009270713.1:6034746-6035065	320	NC_006090.5:20258213-20258526	aUCE.1764
NW_009270713.1:5990793-5991007	215	NC_006090.5:20299435-20299648	aUCE.1765
NW_009270713.1:5985941-5986179	239	NC_006090.5:20303435-20303672	aUCE.1766
NW_009270713.1:5885568-5885785	218	NC_006090.5:20395437-20395653	aUCE.1767
NW_009270713.1:5879149-5879706	558	NC_006090.5:20401275-20401831	aUCE.1768
NW_009270713.1:5869291-5869643	353	NC_006090.5:20409482-20409833	aUCE.1769
NW_009270713.1:5867588-5868138	551	NC_006090.5:20410890-20411439	aUCE.1770
NW_009270713.1:5856400-5856891	492	NC_006090.5:20420583-20421073	aUCE.1771
NW_009270713.1:5856172-5856398	227	NC_006090.5:20421076-20421301	aUCE.1772
NW_009270713.1:5843678-5843905	228	NC_006090.5:20431364-20431590	aUCE.1773
NW_009270713.1:5781833-5782040	208	NC_006090.5:20487455-20487661	aUCE.1774
NW_009270713.1:5744516-5744827	312	NC_006090.5:20522708-20523018	aUCE.1775
NW_009270713.1:5680111-5680449	339	NC_006090.5:20579581-20579918	aUCE.1776
NW_009270713.1:5668732-5669088	357	NC_006090.5:20589902-20590256	aUCE.1777
NW_009270713.1:5652438-5652653	216	NC_006090.5:20605098-20605312	aUCE.1778
NW_009270713.1:5637939-5638207	269	NC_006090.5:20616959-20617226	aUCE.1779
NW_009270713.1:5591973-5592460	488	NC_006090.5:20658019-20658505	aUCE.1780
NW_009270713.1:5579076-5579347	272	NC_006090.5:20669341-20669611	aUCE.1781
NW_009270713.1:5562897-5563163	267	NC_006090.5:20682154-20682419	aUCE.1782
NW_009270713.1:5545700-5546045	346	NC_006090.5:20699202-20699546	aUCE.1783
NW_009270713.1:5541536-5541759	224	NC_006090.5:20703383-20703605	aUCE.1784
NW_009270713.1:5528358-5528559	202	NC_006090.5:20717014-20717214	aUCE.1785
NW_009270713.1:5521630-5521831	202	NC_006090.5:20723548-20723748	aUCE.1786
NW_009270713.1:5518048-5518257	210	NC_006090.5:20727031-20727238	aUCE.1787
NW_009270713.1:5498149-5498385	237	NC_006090.5:20743834-20744069	aUCE.1788
NW_009270713.1:5495772-5496178	407	NC_006090.5:20746028-20746432	aUCE.1789
NW_009270713.1:5494017-5494223	207	NC_006090.5:20748012-20748214	aUCE.1790
NW_009270713.1:5486342-5486544	203	NC_006090.5:20755803-20756001	aUCE.1791
NW_009270713.1:5474608-5474872	265	NC_006090.5:20765919-20766182	aUCE.1792
NW_009270713.1:5468655-5469107	453	NC_006090.5:20771004-20771454	aUCE.1793
NW_009270713.1:5458535-5458825	291	NC_006090.5:20781346-20781635	aUCE.1794
NW_009270713.1:4871315-4871532	218	NC_006090.5:21314010-21314226	aUCE.1795
NW_009270713.1:4855044-4855536	493	NC_006090.5:21331182-21331673	aUCE.1796
NW_009270713.1:4835273-4835557	285	NC_006090.5:21349079-21349362	aUCE.1797
NW_009270713.1:4816455-4816675	221	NC_006090.5:21366630-21366849	aUCE.1798
NW_009270713.1:4806411-4806724	314	NC_006090.5:21375415-21375727	aUCE.1799
NW_009270713.1:4800723-4800944	222	NC_006090.5:21380494-21380710	aUCE.1800
NW_009270713.1:4794966-4795369	404	NC_006090.5:21386126-21386528	aUCE.1801
NW_009270713.1:4790009-4790392	384	NC_006090.5:21391060-21391443	aUCE.1802
NW_009270713.1:4777237-4777478	242	NC_006090.5:21402764-21403004	aUCE.1803
NW_009270713.1:4764545-4764777	233	NC_006090.5:21414961-21415192	aUCE.1804
NW_009270713.1:4757150-4757745	596	NC_006090.5:21421674-21422268	aUCE.1805
NW_009270713.1:4698877-4699118	242	NC_006090.5:21467965-21468204	aUCE.1806
NW_009270713.1:4666999-4667572	574	NC_006090.5:21496516-21497078	aUCE.1807
NW_009270713.1:4639603-4639980	378	NC_006090.5:21520515-21520891	aUCE.1808
NW_009270713.1:4591672-4591978	307	NC_006090.5:21561354-21561662	aUCE.1809
NW_009270713.1:4553476-4553817	342	NC_006090.5:21593134-21593474	aUCE.1810
NW_009270713.1:4511459-4511668	210	NC_006090.5:21636116-21636324	aUCE.1811
NW_009270713.1:4451122-4451520	399	NC_006090.5:21691693-21692087	aUCE.1812
NW_009270713.1:4435538-4435866	329	NC_006090.5:21706900-21707227	aUCE.1813
NW_009270713.1:4422253-4422502	250	NC_006090.5:21718633-21718878	aUCE.1814
NW_009270713.1:4383026-4383607	582	NC_006090.5:21754915-21755495	aUCE.1815
NW_009270713.1:4347714-4348158	445	NC_006090.5:21791173-21791616	aUCE.1816
NW_009270713.1:4222630-4222846	217	NC_006090.5:21877307-21877522	aUCE.1817
NW_009270713.1:3579621-3579840	220	NC_006090.5:22398580-22398798	aUCE.1818
NW_009270713.1:3060355-3060598	244	NC_006090.5:22831922-22832161	aUCE.1819
NW_009270713.1:2685921-2686258	338	NC_006090.5:23173947-23174277	aUCE.1820
NW_009270713.1:2584419-2584751	333	NC_006090.5:23262143-23262474	aUCE.1821
NW_009270713.1:1072819-1073039	221	NC_006090.5:24578387-24578606	aUCE.1822
NW_009270713.1:1055633-1055904	272	NC_006090.5:24595712-24595982	aUCE.1823
NW_009270713.1:185047-186070	1024	NC_006090.5:25386360-25387382	aUCE.1824
NW_009270713.1:154512-154909	398	NC_006090.5:25412711-25413107	aUCE.1825
NW_009270713.1:148946-149153	208	NC_006090.5:25417823-25418029	aUCE.1826
NW_009270713.1:143082-143282	201	NC_006090.5:25423559-25423758	aUCE.1827
NW_009270713.1:84364-84591	228	NC_006090.5:25471546-25471772	aUCE.1828
NW_009271283.1:2652385-2652636	252	NC_006090.5:25579569-25579818	aUCE.1829
NW_009271283.1:2528723-2528924	202	NC_006090.5:25676861-25677061	aUCE.1830
NW_009271283.1:2490455-2490694	240	NC_006090.5:25707216-25707454	aUCE.1831
NW_009271283.1:2470008-2470327	320	NC_006090.5:25724248-25724565	aUCE.1832
NW_009271283.1:2455699-2456031	333	NC_006090.5:25738688-25739019	aUCE.1833
NW_009271283.1:2425779-2426032	254	NC_006090.5:25762035-25762288	aUCE.1834
NW_009271283.1:2424603-2424968	366	NC_006090.5:25763105-25763469	aUCE.1835
NW_009271283.1:2421398-2421619	222	NC_006090.5:25766923-25767140	aUCE.1836
NW_009271283.1:2420313-2420713	401	NC_006090.5:25767795-25768194	aUCE.1837
NW_009271283.1:2412566-2412779	214	NC_006090.5:25775398-25775610	aUCE.1838
NW_009271283.1:2388760-2389050	291	NC_006090.5:25798964-25799253	aUCE.1839
NW_009271283.1:2387326-2387737	412	NC_006090.5:25800243-25800653	aUCE.1840
NW_009271283.1:2374623-2374839	217	NC_006090.5:25811412-25811627	aUCE.1841
NW_009271283.1:2368008-2368248	241	NC_006090.5:25817974-25818205	aUCE.1842
NW_009271283.1:2363426-2363871	446	NC_006090.5:25822219-25822664	aUCE.1843
NW_009271283.1:2362437-2363051	615	NC_006090.5:25823040-25823653	aUCE.1844
NW_009271283.1:2362220-2362435	216	NC_006090.5:25823656-25823870	aUCE.1845
NW_009271283.1:2317897-2318315	419	NC_006090.5:25863781-25864195	aUCE.1846
NW_009271283.1:2281538-2281757	220	NC_006090.5:25899032-25899250	aUCE.1847
NW_009271283.1:2120667-2120964	298	NC_006090.5:26044579-26044875	aUCE.1848
NW_009271283.1:2095470-2095673	204	NC_006090.5:26065069-26065271	aUCE.1849
NW_009271283.1:2084729-2085074	346	NC_006090.5:26074486-26074827	aUCE.1850
NW_009271283.1:2056261-2056670	410	NC_006090.5:26102461-26102869	aUCE.1851
NW_009271283.1:1908164-1908453	290	NC_006090.5:26231863-26232151	aUCE.1852
NW_009271283.1:1887969-1888263	295	NC_006090.5:26250841-26251134	aUCE.1853
NW_009271283.1:1536408-1536632	225	NC_006090.5:26569870-26570092	aUCE.1854
NW_009271283.1:732906-733151	246	NC_006090.5:27251958-27252201	aUCE.1855
NW_009271283.1:472307-472616	310	NC_006090.5:27489059-27489365	aUCE.1856
NW_009271283.1:126843-127049	207	NC_006090.5:27799607-27799809	aUCE.1857
NW_009270713.1:8496692-8496950	259	NC_006090.5:294431-294685	aUCE.1858
NW_009272089.1:6286140-6286363	224	NC_006090.5:29788679-29788900	aUCE.1859
NW_009272089.1:5873878-5874084	207	NC_006090.5:30148643-30148845	aUCE.1860
NW_009272089.1:4537422-4537634	213	NC_006090.5:31154215-31154426	aUCE.1861
NW_009272089.1:3225564-3225794	231	NC_006090.5:32229096-32229325	aUCE.1862
NW_009272089.1:2988267-2988472	206	NC_006090.5:32393722-32393928	aUCE.1863
NW_009272089.1:2987269-2987486	218	NC_006090.5:32394714-32394930	aUCE.1864
NW_009271018.1:1682419-1682657	239	NC_006090.5:3392213-3392450	aUCE.1865
NW_009271018.1:1558105-1558314	210	NC_006090.5:3431148-3431354	aUCE.1866
NW_009272089.1:581251-581520	270	NC_006090.5:34439212-34439479	aUCE.1867
NW_009272089.1:191655-191974	320	NC_006090.5:34786258-34786574	aUCE.1868
NW_009272089.1:187046-187308	263	NC_006090.5:34790579-34790837	aUCE.1869
NW_009271898.1:645931-646233	303	NC_006090.5:34968620-34968915	aUCE.1870
NW_009271898.1:640678-640879	202	NC_006090.5:34972881-34973079	aUCE.1871
NW_009271898.1:627179-627469	291	NC_006090.5:34985814-34986103	aUCE.1872
NW_009271898.1:617417-617775	359	NC_006090.5:34994853-34995224	aUCE.1873
NW_009271898.1:616209-616519	311	NC_006090.5:34996141-34996450	aUCE.1874
NW_009271898.1:614016-614286	271	NC_006090.5:34998417-34998680	aUCE.1875
NW_009271898.1:587615-587828	214	NC_006090.5:35021377-35021589	aUCE.1876
NW_009271898.1:489651-489870	220	NC_006090.5:35111546-35111763	aUCE.1877
NW_009271898.1:458192-458620	429	NC_006090.5:35139756-35140183	aUCE.1878
NW_009271898.1:457745-458189	445	NC_006090.5:35140194-35140635	aUCE.1879
NW_009271898.1:397165-397407	243	NC_006090.5:35191242-35191483	aUCE.1880
NW_009271898.1:389700-389984	285	NC_006090.5:35200171-35200445	aUCE.1881
NW_009271898.1:368927-369166	240	NC_006090.5:35216270-35216505	aUCE.1882
NW_009271898.1:331569-331980	412	NC_006090.5:35248691-35249101	aUCE.1883
NW_009271898.1:315379-315579	201	NC_006090.5:35261935-35262134	aUCE.1884
NW_009271898.1:300351-300741	391	NC_006090.5:35276075-35276464	aUCE.1885
NW_009271898.1:295595-295880	286	NC_006090.5:35280849-35281131	aUCE.1886
NW_009271681.1:812844-813115	272	NC_006090.5:36203237-36203507	aUCE.1887
NW_009271018.1:1178669-1178917	249	NC_006090.5:3623024-3623271	aUCE.1888
NW_009271018.1:1128611-1128912	302	NC_006090.5:3648756-3649051	aUCE.1889
NW_009271018.1:1116386-1116669	284	NC_006090.5:3653650-3653918	aUCE.1890
NW_009270713.1:8409187-8409412	226	NC_006090.5:366680-366901	aUCE.1891
NW_009271018.1:1068902-1069218	317	NC_006090.5:3667005-3667318	aUCE.1892
NW_009270256.1:3952522-3952927	406	NC_006090.5:38260433-38260835	aUCE.1893
NW_009270256.1:3931374-3931611	238	NC_006090.5:38276671-38276906	aUCE.1894
NW_009271018.1:661593-661955	363	NC_006090.5:3884822-3885183	aUCE.1895
NW_009270256.1:877039-877331	293	NC_006090.5:40841477-40841768	aUCE.1896
NW_009270095.1:435846-436048	203	NC_006090.5:42206659-42206860	aUCE.1897
NW_009270095.1:427861-428128	268	NC_006090.5:42214313-42214576	aUCE.1898
NW_009270095.1:372456-372669	214	NC_006090.5:42257326-42257538	aUCE.1899
NW_009270256.1:5377774-5378021	248	NC_006090.5:43411302-43411545	aUCE.1900
NW_009270256.1:5729283-5729483	201	NC_006090.5:43726196-43726395	aUCE.1901
NW_009270256.1:6192732-6192936	205	NC_006090.5:44163186-44163388	aUCE.1902
NW_009276902.1:1066852-1067090	239	NC_006090.5:45728761-45728998	aUCE.1903
NW_009270571.1:263555-263798	244	NC_006090.5:47500255-47500481	aUCE.1904
NW_009271347.1:471178-471523	346	NC_006090.5:50720485-50720829	aUCE.1905
NW_009271347.1:366046-366248	203	NC_006090.5:50813892-50814093	aUCE.1906
NW_009271347.1:314595-314804	210	NC_006090.5:50863791-50863993	aUCE.1907
NW_009271347.1:248071-248306	236	NC_006090.5:50924635-50924869	aUCE.1908
NW_009271347.1:215494-215720	227	NC_006090.5:50955911-50956136	aUCE.1909
NW_009271347.1:198376-198621	246	NC_006090.5:50972211-50972455	aUCE.1910
NW_009271347.1:173112-173328	217	NC_006090.5:50996139-50996354	aUCE.1911
NW_009271347.1:33027-33305	279	NC_006090.5:51123561-51123838	aUCE.1912
NW_009272129.1:1156649-1156866	218	NC_006090.5:51266921-51267137	aUCE.1913
NW_009272129.1:972473-972798	326	NC_006090.5:51441280-51441604	aUCE.1914
NW_009272129.1:959277-959504	228	NC_006090.5:51453613-51453839	aUCE.1915
NW_009272129.1:924880-925120	241	NC_006090.5:51485777-51486015	aUCE.1916
NW_009272129.1:885003-885258	256	NC_006090.5:51525552-51525805	aUCE.1917
NW_009271030.1:24874-25083	210	NC_006090.5:53025863-53026071	aUCE.1918
NW_009276907.1:6448442-6448649	208	NC_006090.5:53562052-53562253	aUCE.1919
NW_009276907.1:6288333-6288593	261	NC_006090.5:53723698-53723957	aUCE.1920
NW_009276907.1:5989291-5989548	258	NC_006090.5:54015317-54015573	aUCE.1921
NW_009276907.1:5718417-5718713	297	NC_006090.5:54264289-54264584	aUCE.1922
NW_009276907.1:5123111-5123401	291	NC_006090.5:54748667-54748956	aUCE.1923
NW_009276907.1:5087977-5088196	220	NC_006090.5:54775453-54775669	aUCE.1924
NW_009276907.1:5075209-5075420	212	NC_006090.5:54784663-54784873	aUCE.1925
NW_009276907.1:5064480-5064749	270	NC_006090.5:54793150-54793392	aUCE.1926
NW_009276907.1:5048894-5049158	265	NC_006090.5:54805509-54805771	aUCE.1927
NW_009276907.1:5017722-5017981	260	NC_006090.5:54832642-54832900	aUCE.1928
NW_009276907.1:4984457-4984715	259	NC_006090.5:54859446-54859703	aUCE.1929
NW_009276907.1:4444030-4444253	224	NC_006090.5:55308664-55308886	aUCE.1930
NW_009276907.1:3961970-3962297	328	NC_006090.5:55734287-55734613	aUCE.1931
NW_009276907.1:3215736-3215953	218	NC_006090.5:56397522-56397736	aUCE.1932
NW_009276907.1:3195630-3195854	225	NC_006090.5:56417279-56417501	aUCE.1933
NW_009276907.1:3195271-3195628	358	NC_006090.5:56417504-56417860	aUCE.1934
NW_009276907.1:3158738-3158983	246	NC_006090.5:56452601-56452845	aUCE.1935
NW_009276907.1:3118938-3119190	253	NC_006090.5:56488946-56489198	aUCE.1936
NW_009276907.1:2973414-2973620	207	NC_006090.5:56617746-56617951	aUCE.1937
NW_009276907.1:2770860-2771070	211	NC_006090.5:56809601-56809808	aUCE.1938
NW_009276907.1:2766849-2767064	216	NC_006090.5:56813306-56813520	aUCE.1939
NW_009276907.1:228167-228380	214	NC_006090.5:59003090-59003300	aUCE.1940
NW_009276907.1:5643-5870	228	NC_006090.5:59202495-59202720	aUCE.1941
NW_009271686.1:2562796-2563020	225	NC_006090.5:64897577-64897795	aUCE.1942
NW_009271744.1:865011-865266	256	NC_006090.5:65996754-65997008	aUCE.1943
NW_009271744.1:891261-891607	347	NC_006090.5:66020938-66021283	aUCE.1944
NW_009271744.1:1057422-1057711	290	NC_006090.5:66169609-66169897	aUCE.1945
NW_009271346.1:4543487-4543712	226	NC_006090.5:66494850-66495074	aUCE.1946
NW_009271346.1:3519381-3519588	208	NC_006090.5:67345750-67345956	aUCE.1947
NW_009271346.1:3426145-3426486	342	NC_006090.5:67416578-67416914	aUCE.1948
NW_009271346.1:3405630-3405947	318	NC_006090.5:67436232-67436545	aUCE.1949
NW_009271346.1:3345736-3345985	250	NC_006090.5:67494877-67495125	aUCE.1950
NW_009271346.1:3293880-3294277	398	NC_006090.5:67531000-67531396	aUCE.1951
NW_009271346.1:3290042-3290336	295	NC_006090.5:67534050-67534327 (Blat hit)	aUCE.1952
NW_009271346.1:3287957-3288192	236	NC_006090.5:67535301-67535524	aUCE.1953
NW_009271346.1:2298232-2298509	278	NC_006090.5:68387066-68387342	aUCE.1954
NW_009271775.1:2313500-2313737	238	NC_006090.5:70243533-70243767	aUCE.1955
NW_009271775.1:2310991-2311214	224	NC_006090.5:70245873-70246094	aUCE.1956
NW_009271775.1:2263791-2264026	236	NC_006090.5:70288316-70288550	aUCE.1957
NW_009271775.1:1613916-1614285	370	NC_006090.5:70878507-70878875	aUCE.1958
NW_009271775.1:1597495-1597993	499	NC_006090.5:70895011-70895508	aUCE.1959
NW_009271775.1:1578386-1578618	233	NC_006090.5:70915015-70915242	aUCE.1960
NW_009271775.1:1570183-1570518	336	NC_006090.5:70923017-70923350	aUCE.1961
NW_009271775.1:1343616-1343857	242	NC_006090.5:71141728-71141968	aUCE.1962
NW_009271775.1:1047532-1047847	316	NC_006090.5:71392789-71393100	aUCE.1963
NW_009271775.1:1045071-1045566	496	NC_006090.5:71395632-71396124	aUCE.1964
NW_009271775.1:1017667-1017875	209	NC_006090.5:71411319-71411526	aUCE.1965
NW_009271775.1:970419-970808	390	NC_006090.5:71448450-71448837	aUCE.1966
NW_009271775.1:903985-904199	215	NC_006090.5:71505748-71505972	aUCE.1967
NW_009271775.1:811327-811551	225	NC_006090.5:71574399-71574621	aUCE.1968
NW_009271775.1:802953-803262	310	NC_006090.5:71581645-71581953	aUCE.1969
NW_009271775.1:771381-771698	318	NC_006090.5:71607488-71607804	aUCE.1970
NW_009271775.1:694441-694645	205	NC_006090.5:71669853-71670056	aUCE.1971
NW_009271775.1:545605-545809	205	NC_006090.5:71784964-71785167	aUCE.1972
NW_009271775.1:536878-537095	218	NC_006090.5:71792060-71792276	aUCE.1973
NW_009271775.1:498734-499002	269	NC_006090.5:71827461-71827732	aUCE.1974
NW_009271775.1:490698-491002	305	NC_006090.5:71835062-71835365	aUCE.1975
NW_009271775.1:486273-486634	362	NC_006090.5:71839459-71839819	aUCE.1976
NW_009271775.1:476820-477036	217	NC_006090.5:71848778-71848994	aUCE.1977
NW_009271775.1:459870-460149	280	NC_006090.5:71864032-71864309	aUCE.1978
NW_009271775.1:436900-437213	314	NC_006090.5:71882530-71882842	aUCE.1979
NW_009271775.1:386831-387036	206	NC_006090.5:71928808-71929009	aUCE.1980
NW_009271775.1:377799-378004	206	NC_006090.5:71936992-71937196	aUCE.1981
NW_009271775.1:353610-353880	271	NC_006090.5:71959461-71959730	aUCE.1982
NW_009271775.1:351272-351497	226	NC_006090.5:71961707-71961931	aUCE.1983
NW_009271775.1:342544-342838	295	NC_006090.5:71969385-71969671	aUCE.1984
NW_009271775.1:312703-312999	297	NC_006090.5:71984843-71985135	aUCE.1985
NW_009271775.1:272013-272456	444	NC_006090.5:72023228-72023657	aUCE.1986
NW_009271775.1:268257-268619	363	NC_006090.5:72026643-72027004	aUCE.1987
NW_009271775.1:189989-190709	721	NC_006090.5:72098115-72098833	aUCE.1988
NW_009271775.1:151788-151996	209	NC_006090.5:72136097-72136304	aUCE.1989
NW_009271775.1:129414-129796	383	NC_006090.5:72156390-72156771	aUCE.1990
NW_009271775.1:129207-129412	206	NC_006090.5:72156774-72156979	aUCE.1991
NW_009271775.1:102917-103344	428	NC_006090.5:72180194-72180615	aUCE.1992
NW_009271775.1:102365-102715	351	NC_006090.5:72180840-72181189	aUCE.1993
NW_009271775.1:10944-11145	202	NC_006090.5:72276443-72276643	aUCE.1994
NW_009271775.1:10301-10564	264	NC_006090.5:72277028-72277290	aUCE.1995
NW_009271724.1:354207-354460	254	NC_006090.5:72313861-72314113	aUCE.1996
NW_009271724.1:407886-408108	223	NC_006090.5:72357758-72357979	aUCE.1997
NW_009271724.1:648881-649380	500	NC_006090.5:72585096-72585585	aUCE.1998
[truncated: 3,940 more rows]

## Sheet: S5
Supplemental Table S5: Additional assemblies analyzed in this study.
Common name	Scientific name	Assembly ID	Contig N50	Scaffold N50
Platypus	Ornithorhynchus anatinus	GCF_004115215.2	15146802	83338043
Chinese Alligator	Chinese Alligator	GCF_000455745.1	23412	2188296
Green sea turtle	Chelonia mydas	GCF_000344595.1	29240	3864108
African clawed frog	Xenopus laevis	GCF_001663975.1	19713	136570856
Axolotl	Ambystoma mexicanum	GCA_002915635.2	216366	1412624359
Coelacanth	Latimeria chalumnae	GCF_000225785.1	12671	924513
Japanese eel	Anguilla japonica	GCA_002723815	11014	36264158
Common carp	Cyprinus carpio	GCF_000951615	75080	7828959
Little skate	Leucoraja erinacea	GCA_000238235	665	NA
Elephant shark	Callorhinchus milii	GCF_000165045.1	46577	4521921
Sea lamprey	Petromyzon marinus	GCA_002833325	170712	11932523
Inshore hagfish	Eptatretus burgeri	GCA_900186335	7991	2692996

## Sheet: S6
Supplemental Table S6: Human and chicken transcriptomes used in gene expression analyses.
Species	BioSample	Run	MBases	MBytes	Tissue
Human	SAMN09976190	SRR7821515	7923	3455	Lung
Human	SAMN09976185	SRR7821512	7880	3477	Lung
Human	SAMN09976187	SRR7821510	7903	3425	Lung
Human	SAMN09976193	SRR7821507	7832	3201	Lung
Human	SAMN09976182	SRR7821478	8610	3099	Lung
Human	SAMN09976268	SRR7821286	9828	3563	Liver
Human	SAMN09976150	SRR7821347	7059	3020	Liver
Human	SAMN09976271	SRR7821315	8877	4063	Liver
Human	SAMN09976208	SRR7821427	9167	4219	Liver
Human	SAMN09976203	SRR7821394	9521	3625	Liver
Human	SAMN08578616	SRR6757208	4917	1710	Pancreas
Human	SAMN08578615	SRR6757209	4942	1710	Pancreas
Human	SAMN08578614	SRR6757210	4876	1698	Pancreas
Human	SAMN08578613	SRR6757211	4628	1596	Pancreas
Human	SAMN08578612	SRR6757212	4809	1650	Pancreas
Human	SAMN03279806	SRR1747143	11568	7612	Brain
Human	SAMN03279803	SRR1747146	14511	8985	Brain
Human	SAMN03279827	SRR1747147	6126	3614	Brain
Human	SAMN03279834	SRR1747149	6673	4030	Brain
Human	SAMN03279801	SRR1747151	9025	5515	Brain
Human	SAMN09433022	SRR7349903	8758	5822	Skin
Human	SAMN09433021	SRR7349904	9328	6205	Skin
Human	SAMN09433020	SRR7349905	10340	6887	Skin
Human	SAMN09433018	SRR7349907	7143	4955	Skin
Human	SAMN09433019	SRR7349906	11122	7431	Skin
Human	SAMN02678287	SRR1186056	5242	3585	Spleen
Human	SAMN02339933	SRR628229	593	322	Spleen
Human	SAMEA2155751	ERR315405	2344	1234	Spleen
Human	SAMEA2155751	ERR315416	2299	1210	Spleen
Human	SAMEA2159764	ERR315473	4714	2369	Spleen
Human	SAMN06470854	SRR5310365	4232.66	2580.28	Adipose
Human	SAMN06470791	SRR5310394	3918.73	2469.29	Adipose
Human	SAMN06470551	SRR5310525	7935.16	5731.6	Adipose
Human	SAMN06470464	SRR5310564	3099.98	1895.63	Adipose
Human	SAMN06470246	SRR5310694	4026.26	2723.89	Adipose
Human	SAMN07190259	SRR5643181	18409.1	7804.81	Testis
Human	SAMN07190258	SRR5643182	14103	5814.71	Testis
Human	SAMN07190257	SRR5643183	18200.6	7468.14	Testis
Human	SAMEA104105623	ERR1994745	2745.83	1247.92	Testis
Human	SAMEA104105624	ERR1994746	2211.04	1017.67	Testis
Human	SAMEA2161836	ERR315423	1961.47	983.608	Small intestine
Human	SAMEA2153733	ERR315381	2413.25	1230.7	Small intestine
Human	SAMEA2153733	ERR315388	2396.31	1210.43	Small intestine
Human	SAMEA2161836	ERR315409	1978.55	1002.43	Small intestine
Human	SAMEA2152474	ERR315419	1870.27	939.246	Small intestine
Human	SAMN10181169	SRR7968970	7502.9	3208.72	Kidney
Human	SAMN10181169	SRR7968971	7680.7	3236.84	Kidney
Human	SAMN10181168	SRR7968972	7498.97	3193.01	Kidney
Human	SAMN10181168	SRR7968973	7643.58	3204	Kidney
Human	SAMN10181166	SRR7968974	7786.57	3316.42	Kidney
Human	SAMN09302743	SRR7275247	13854	5994	Facet joint cartilage
Human	SAMN09302742	SRR7275248	12920	5673	Facet joint cartilage
Human	SAMN09302738	SRR7275252	23141	8622	Facet joint cartilage
Human	SAMN09302740	SRR7275250	14692	5470	Facet joint cartilage
Human	SAMN09302739	SRR7275251	18178	7180	Facet joint cartilage
Chicken	SAMEA4504221	ERR1682087	13907	9801	Spleen
Chicken	SAMEA4504222	ERR1682088	14445	10161	Spleen
Chicken	SAMEA4504223	ERR1682089	12944	9098	Spleen
Chicken	SAMEA104468959	ERR2244895	2439	899	Caecal tonsil
Chicken	SAMEA104468961	ERR2244901	2331	858	Caecal tonsil
Chicken	SAMEA104468970	ERR2244902	2192	813	Caecal tonsil
Chicken	SAMEA2201379	ERR348569	12173	7887	Heart
Chicken	SAMEA2201382	ERR348583	11473	7154	Heart
Chicken	SAMN02199159	SRR924549	11473	7374	Heart
Chicken	SAMN02199160	SRR924550	12173	8148	Heart
Chicken	SAMEA2201357	ERR348579	9894	6437	Lung
Chicken	SAMEA2201362	ERR348582	8688	5510	Lung
Chicken	SAMN02199167	SRR924557	9894	6526	Lung
Chicken	SAMN02199168	SRR924558	8688	5601	Lung
Chicken	SAMN05952475	SRR4478740	1740	919	Pituitary
Chicken	SAMN05952474	SRR4478741	1987	1063	Pituitary
Chicken	SAMN05952473	SRR4478742	1982	1061	Pituitary
Chicken	SAMN05981701	SRR4933181	2257	1449	Kidney
Chicken	SAMN05981696	SRR4933182	2141	1365	Kidney
Chicken	SAMN05981697	SRR4933183	2388	1546	Kidney
Chicken	SAMN06007239	SRR5007733	2575	1136	Bone
Chicken	SAMN06007240	SRR5007738	4159	1881	Bone
Chicken	SAMN06007241	SRR5007740	2403	1067	Bone
Chicken	SAMN06007242	SRR5007759	3441	1535	Bone
Chicken	SAMN01103462	SRR536788	15910	10416	Gonad
Chicken	SAMN01103463	SRR536790	16793	10968	Gonad
Chicken	SAMN01103464	SRR538806	21661	14147	Gonad
Chicken	SAMN01103465	SRR538807	20094	13143	Gonad
Chicken	SAMN07349302	SRR5823222	5995	2873	Trachea
Chicken	SAMN07349301	SRR5823223	1310	675	Trachea
Chicken	SAMN07349300	SRR5823224	1493	761	Trachea
Chicken	SAMN07349299	SRR5823225	1403	730	Trachea
Chicken	SAMN07349298	SRR5823226	1727	879	Trachea
Chicken	SAMN07488270	SRR5922818	3708	1376	Skin
Chicken	SAMN07488271	SRR5922819	3701	1369	Skin
Chicken	SAMN07488268	SRR5922822	3401	1251	Skin
Chicken	SAMN07488269	SRR5922823	3571	1308	Skin
Chicken	SAMN07568765	SRR5985788	14697	5735	Skin
Chicken	SAMN07781831	SRR6169229	9581	3478	Breast muscle
Chicken	SAMN07781830	SRR6169230	8639	3123	Breast muscle
Chicken	SAMN07781829	SRR6169231	7778	2847	Breast muscle
Chicken	SAMN08141988	SRR6356479	11433	4445	Intestine
Chicken	SAMN08141990	SRR6356481	9898	3815	Intestine
Chicken	SAMN08141991	SRR6356484	10752	4195	Intestine
Chicken	SAMN08141986	SRR6356485	10436	4005	Intestine
Chicken	SAMN08141994	SRR6356489	9921	3807	Intestine
Chicken	SAMN08144201	SRR6357662	8963	3742	Comb
Chicken	SAMN08144200	SRR6357663	7831	3337	Comb
Chicken	SAMN08144199	SRR6357664	8665	3573	Comb
Chicken	SAMN08536171	SRR6726367	11662	4850	Feather
Chicken	SAMN08536170	SRR6726368	10180	4413	Feather
Chicken	SAMN08536169	SRR6726369	11514	4958	Feather
Chicken	SAMN08536168	SRR6726370	9977	4303	Feather
Chicken	SAMN08719879	SRR6844895	3948	1552	Liver
Chicken	SAMN08719878	SRR6844896	3402	1363	Liver
Chicken	SAMN08719877	SRR6844897	3650	1444	Liver
Chicken	SAMN02199161	SRR924551	18268	11977	Hypothalamus
Chicken	SAMN02199162	SRR924552	17981	11753	Hypothalamus
Chicken	SAMN02261961	SRR942372	2989	2334	Adipose
Chicken	SAMN02261963	SRR942373	4147	3240	Adipose
Chicken	SAMN02261965	SRR942374	4393	3439	Adipose
Chicken	SAMN02261964	SRR942375	4057	3176	Adipose

## Sheet: S7
Supplemental Table S7: GO enrichment of mammalian UCEs.
ONTOLOGY	ID	Description	GeneRatio	BgRatio	pvalue	p.adjust	qvalue	Count	geneID
BP	GO:0035107	appendage morphogenesis	36/712	142/18903	3.335e-20	7.4554e-17	6.18555e-17	36	100131390/1499/2019/2131/221833/23322/25836/2737/3227/3236/340419/4089/4154/494470/5087/51057/51776/5396/546/5469/55636/5727/5915/6299/6474/6664/7020/7021/7473/7547/7704/80856/860/8626/8854/9241
BP	GO:0035108	limb morphogenesis	36/712	142/18903	3.335e-20	7.4554e-17	6.18555e-17	36	100131390/1499/2019/2131/221833/23322/25836/2737/3227/3236/340419/4089/4154/494470/5087/51057/51776/5396/546/5469/55636/5727/5915/6299/6474/6664/7020/7021/7473/7547/7704/80856/860/8626/8854/9241
BP	GO:0007389	pattern specification process	63/712	472/18903	1.58223e-18	2.33496e-15	1.93726e-15	63	10159/10194/10370/10468/10660/120237/1499/170825/1745/1746/2018/2019/204851/2066/2131/2138/221833/23322/23648/2637/27023/2737/3199/3217/3222/3223/3227/3236/324/3280/340260/4089/4208/4211/4212/4762/497189/5076/5087/5090/5100/5308/54880/55079/55182/5649/5727/5991/6092/6422/64399/6781/7080/7473/7547/7704/80319/8313/8626/8854/9096/92/9241
BP	GO:0030900	forebrain development	56/712	383/18903	2.08898e-18	2.33496e-15	1.93726e-15	56	1000/1385/1398/1499/170302/170825/1745/1746/1996/2018/2044/2066/2131/23322/23440/2534/2637/266727/27023/27086/2737/317762/3280/3400/340260/3746/4009/431707/474/4781/4929/50674/5079/5308/5453/5454/5455/546/55079/55636/5629/5649/57178/5915/6092/6299/7080/7101/7155/7547/84623/8854/91584/9241/93986/9760
BP	GO:0048736	appendage development	37/712	178/18903	1.30255e-17	9.70618e-15	8.05297e-15	37	100131390/1499/2019/2131/221833/23322/25836/2737/3227/3236/340419/4089/4154/494470/5087/51057/51776/5308/5396/546/5469/55636/5727/5915/6299/6474/6664/7020/7021/7473/7547/7704/80856/860/8626/8854/9241
BP	GO:0060173	limb development	37/712	178/18903	1.30255e-17	9.70618e-15	8.05297e-15	37	100131390/1499/2019/2131/221833/23322/25836/2737/3227/3236/340419/4089/4154/494470/5087/51057/51776/5308/5396/546/5469/55636/5727/5915/6299/6474/6664/7020/7021/7473/7547/7704/80856/860/8626/8854/9241
BP	GO:0030326	embryonic limb morphogenesis	30/712	118/18903	4.33527e-17	2.42288e-14	2.0102e-14	30	100131390/1499/2019/221833/23322/25836/2737/3227/3236/340419/4089/4154/5087/51057/51776/5396/5469/55636/5727/5915/6299/6474/7020/7473/7704/80856/860/8626/8854/9241
BP	GO:0035113	embryonic appendage morphogenesis	30/712	118/18903	4.33527e-17	2.42288e-14	2.0102e-14	30	100131390/1499/2019/221833/23322/25836/2737/3227/3236/340419/4089/4154/5087/51057/51776/5396/5469/55636/5727/5915/6299/6474/7020/7473/7704/80856/860/8626/8854/9241
BP	GO:0003002	regionalization	52/712	360/18903	6.12282e-17	3.04168e-14	2.5236e-14	52	10159/10194/10370/120237/1499/170825/1745/1746/2018/2019/204851/2131/221833/23322/23648/2637/27023/2737/3199/3217/3222/3223/3227/3236/3280/4089/4208/4762/497189/5076/5087/5090/5100/5308/55079/55182/5649/5727/6092/6422/64399/7080/7473/7547/7704/80319/8313/8626/8854/9096/92/9241
BP	GO:0045165	cell fate commitment	45/712	282/18903	1.80522e-16	8.07113e-14	6.69641e-14	45	10660/1107/11281/120237/1499/170302/170825/1745/1746/2066/2131/2138/25925/2619/2737/3175/3199/3236/324/3280/343472/4089/4208/474/4762/5076/5396/5454/54845/55079/55553/5629/5727/6422/64641/6660/6774/6934/7080/7101/7473/8543/860/9096/9760
BP	GO:0007409	axonogenesis	57/712	438/18903	2.35283e-16	9.56318e-14	7.93432e-14	57	1000/1009/10154/1385/1496/152330/1630/170302/1826/1946/1948/2044/2128/2131/22854/23077/2534/26053/2637/27023/2737/288/3199/343472/4009/4089/4133/474/4781/4825/4929/494470/5063/5076/5454/5458/5459/55079/5532/5649/56956/5727/57698/6092/644168/6474/7080/7101/7155/7422/7473/8609/91584/9241/9369/9378/9423
BP	GO:0021953	central nervous system neuron differentiation	34/712	174/18903	1.96345e-15	7.31549e-13	6.06947e-13	34	1009/10660/120237/1630/170302/170825/1745/1746/1996/23077/23440/2637/266727/2737/2895/3236/3280/3400/4009/4133/431707/4781/4825/4929/55079/5629/57178/5727/6095/7080/7101/8543/91584/9760
BP	GO:0045664	regulation of neuron differentiation	36/712	196/18903	2.23687e-15	7.69312e-13	6.38279e-13	36	10660/152330/1745/1746/1840/2138/2737/3199/3280/339479/3400/4009/4208/4211/463/474/4761/4762/4825/50674/5087/53335/5458/5469/54845/54897/55079/5629/5649/6422/6664/6925/6938/7101/9315/9745
BP	GO:0061564	axon development	59/712	490/18903	2.50328e-15	7.9944e-13	6.63275e-13	59	1000/1009/10154/1385/1496/152330/1630/170302/1826/1946/1948/2044/2128/2131/22854/23077/2534/26053/2637/27023/2737/288/3199/343472/349667/4009/4089/4133/474/4781/4825/4929/494470/5063/5076/5454/5458/5459/55079/5532/5649/56956/5727/57698/6092/644168/6474/7080/7101/7155/7422/7473/8609/91584/9241/9315/9369/9378/9423
BP	GO:0035136	forelimb morphogenesis	17/712	39/18903	1.20411e-14	3.58904e-12	2.97773e-12	17	1499/2019/23322/25836/3236/340419/494470/546/6474/7020/7021/7473/7704/80856/860/8626/8854
BP	GO:0021537	telencephalon development	40/712	255/18903	1.60434e-14	4.48312e-12	3.71953e-12	40	1000/1398/1499/170302/170825/1745/1746/2018/2044/2066/2131/23322/266727/27023/27086/2737/317762/3280/3400/340260/4009/474/4781/5079/5454/5455/55079/55636/5629/5649/57178/5915/6092/6299/7080/7101/7547/84623/91584/93986
BP	GO:1903311	regulation of mRNA metabolic process	44/712	309/18903	2.73866e-14	7.20266e-12	5.97586e-12	44	10140/10150/10181/10250/10492/10659/10768/11052/1996/221662/23019/23112/2332/23369/246175/3181/3182/3183/3184/3190/3191/3192/4154/4670/4848/4857/54715/56853/58517/6431/6625/6651/6732/7072/7812/79068/8087/8313/83989/8761/91746/9444/9584/9698
BP	GO:0043484	regulation of RNA splicing	33/712	180/18903	3.51581e-14	8.73288e-12	7.24544e-12	33	10137/10150/10181/10250/10659/1195/221662/2332/2334/284695/3181/3189/3190/3191/3192/4154/4857/54715/54845/56853/58517/6314/6426/6431/6625/6651/6732/7072/8087/83989/91746/9444/9584
BP	GO:0048568	embryonic organ development	54/712	449/18903	4.22117e-14	9.93309e-12	8.24123e-12	54	10194/10370/10660/1301/1499/1746/2019/204851/2138/23414/25836/2637/2737/3199/3217/3227/3236/3280/340784/3491/4208/474/4762/497189/5076/5079/5087/5090/51057/5308/5396/5459/5469/55084/55636/56034/5629/5727/5915/5930/6299/64072/6474/6664/7003/7020/7422/7547/860/8854/9096/91584/9241/9423
BP	GO:0007411	axon guidance	37/712	236/18903	1.60442e-13	3.58669e-11	2.97578e-11	37	10154/152330/1630/170302/1826/1946/1948/2044/2128/2131/23077/2534/2637/2737/3199/4009/4089/474/4781/494470/5458/5459/55079/5649/56956/5727/6092/644168/7080/7422/7473/8609/91584/9241/9369/9378/9423
BP	GO:0097485	neuron projection guidance	37/712	237/18903	1.83473e-13	3.90623e-11	3.2409e-11	37	10154/152330/1630/170302/1826/1946/1948/2044/2128/2131/23077/2534/2637/2737/3199/4009/4089/474/4781/494470/5458/5459/55079/5649/56956/5727/6092/644168/7080/7422/7473/8609/91584/9241/9369/9378/9423
BP	GO:0048024	regulation of mRNA splicing, via spliceosome	25/712	109/18903	2.34415e-13	4.76395e-11	3.95253e-11	25	10150/10181/10250/10659/221662/2332/3181/3190/3191/3192/4154/4857/54715/56853/58517/6431/6625/6651/6732/7072/8087/83989/91746/9444/9584
BP	GO:0001764	neuron migration	31/712	177/18903	7.56045e-13	1.46969e-10	1.21936e-10	31	10806/1398/1496/1499/1630/170302/2018/2128/22854/23060/23284/2534/25836/26053/266727/343472/4208/474/4825/4929/55079/5649/57178/57698/644168/6774/7080/7155/7422/84623/9423
BP	GO:0008380	RNA splicing	53/712	469/18903	8.9536e-13	1.66798e-10	1.38388e-10	53	100128988/10137/10150/10180/10181/10250/10432/10492/10659/10891/1195/1665/1996/221662/2332/2334/23524/25862/284695/3181/3183/3189/3190/3191/3192/4154/4670/4857/51319/54715/54845/55692/56853/58517/6314/64121/6426/6431/6625/6651/6732/7072/8087/83989/8621/91746/9295/9406/94104/9444/9541/9584/9879
BP	GO:0048705	skeletal system morphogenesis	35/712	227/18903	1.20897e-12	2.16213e-10	1.79386e-10	35	10370/1301/1386/1499/158326/1746/2131/2138/25836/2737/3199/3217/3227/3236/340260/4208/4762/497189/5079/51741/5396/55553/5915/6422/64399/6474/6660/6664/6781/7020/7763/8313/84159/860/9241
BP	GO:0000380	alternative mRNA splicing, via spliceosome	21/712	81/18903	1.51145e-12	2.59911e-10	2.15642e-10	21	10150/10181/10659/221662/2332/3191/3192/4154/4670/4857/51319/54715/56853/58517/6426/6431/7072/8087/83989/8621/91746
BP	GO:0050684	regulation of mRNA processing	27/712	139/18903	1.81895e-12	3.01205e-10	2.49902e-10	27	10150/10181/10250/10659/10768/11052/221662/2332/3181/3190/3191/3192/4154/4857/54715/56853/58517/6431/6625/6651/6732/7072/8087/83989/91746/9444/9584
BP	GO:0048562	embryonic organ morphogenesis	39/712	294/18903	7.85873e-12	1.25487e-09	1.04113e-09	39	10194/10370/10660/1301/1499/1746/204851/2138/25836/2637/2737/3199/3217/3227/3236/3280/340784/4208/474/4762/497189/5076/5079/51057/5396/5459/55084/55636/5629/5915/64072/6474/6664/7020/7547/860/9096/9241/9423
BP	GO:0009952	anterior/posterior pattern specification	33/712	218/18903	8.97491e-12	1.38368e-09	1.14801e-09	33	10159/10194/1499/2018/2019/204851/23648/2637/27023/2737/3199/3217/3222/3223/3227/3236/3280/4089/4762/497189/5087/5090/5100/55079/6422/7473/7547/7704/8313/8854/9096/92/9241
BP	GO:0090596	sensory organ morphogenesis	37/712	272/18903	1.28681e-11	1.91778e-09	1.59113e-09	37	10194/10370/1301/1499/1826/204851/2138/23322/25836/2637/2737/3199/340784/4211/474/4762/497189/5076/51057/5308/5396/5459/55084/55636/55714/5629/5915/64072/6664/6774/7020/7021/7422/7547/9096/9241/9423
BP	GO:0048863	stem cell differentiation	35/712	248/18903	1.61911e-11	2.33518e-09	1.93744e-09	35	1000/10370/1106/1107/124540/1499/2066/2103/2131/221662/23528/2637/3192/3280/4089/4208/5076/5308/5469/55553/6422/64839/6660/6664/6774/7473/7547/8091/83989/860/8621/8626/8854/9241/9698
BP	GO:0001655	urogenital system development	43/712	360/18903	2.23487e-11	3.12253e-09	2.59068e-09	43	11174/1499/170690/1948/2018/2066/2131/2138/23322/25836/27023/2737/3217/3227/3280/3400/4089/4208/4774/5076/5087/51057/5455/5629/5727/5915/6092/6299/6422/6664/7020/7021/7337/7422/7704/84159/84623/8626/8854/9096/9241/9420/9863
BP	GO:0007517	muscle organ development	42/712	348/18903	2.74846e-11	3.72374e-09	3.08949e-09	42	10370/10472/10660/1106/1301/1385/1499/1756/221662/23060/23414/3236/406/4089/4208/463/4762/497189/5079/5081/5463/5469/54715/5532/55553/55636/55692/5629/59269/607/6474/6664/6938/8087/8110/84159/905/9241/9318/94104/9734/9975
BP	GO:0030522	intracellular receptor signaling pathway	36/712	266/18903	2.83463e-11	3.72754e-09	3.09265e-09	36	10370/10499/1488/167465/2103/2104/23019/23369/26057/2649/27086/29966/3174/406/4330/4848/4929/5458/5469/55885/57178/5915/6095/6422/6774/7101/7337/8289/8626/8854/9063/9420/9611/9698/9745/9975
BP	GO:0048663	neuron fate commitment	18/712	68/18903	4.10351e-11	5.24195e-09	4.34911e-09	18	10660/120237/1499/170825/1745/1746/2138/25925/2737/3236/4089/474/5396/5454/54845/55079/5629/7080
BP	GO:0010975	regulation of neuron projection development	48/712	446/18903	6.20724e-11	7.70905e-09	6.396e-09	48	1000/10154/1398/1496/1523/1630/1826/1946/1948/1996/22854/23043/23077/23316/2534/257194/2895/3082/3280/349667/4133/5063/50674/53335/5396/5454/5458/55079/55704/55714/5587/5649/57554/57698/577/5789/6092/6422/6474/7101/7337/7422/7473/81545/91584/9423/9760/9863
BP	GO:0000377	RNA splicing, via transesterification reactions with bulged adenosine as nucleophile	40/712	329/18903	6.5608e-11	7.71929e-09	6.4045e-09	40	100128988/10150/10180/10181/10250/10432/10492/10659/221662/2332/23524/25862/3181/3183/3189/3190/3191/3192/4154/4670/4857/51319/54715/55692/56853/58517/6426/6431/6625/6651/6732/7072/8087/83989/8621/91746/94104/9444/9584/9879
BP	GO:0000398	mRNA splicing, via spliceosome	40/712	329/18903	6.5608e-11	7.71929e-09	6.4045e-09	40	100128988/10150/10180/10181/10250/10432/10492/10659/221662/2332/23524/25862/3181/3183/3189/3190/3191/3192/4154/4670/4857/51319/54715/55692/56853/58517/6426/6431/6625/6651/6732/7072/8087/83989/8621/91746/94104/9444/9584/9879
BP	GO:0000381	regulation of alternative mRNA splicing, via spliceosome	17/712	62/18903	7.75183e-11	8.88678e-09	7.37313e-09	17	10150/10181/10659/221662/2332/3191/3192/4154/4857/54715/56853/58517/6431/7072/8087/83989/91746
BP	GO:0000375	RNA splicing, via transesterification reactions	40/712	333/18903	9.51626e-11	1.06368e-08	8.82508e-09	40	100128988/10150/10180/10181/10250/10432/10492/10659/221662/2332/23524/25862/3181/3183/3189/3190/3191/3192/4154/4670/4857/51319/54715/55692/56853/58517/6426/6431/6625/6651/6732/7072/8087/83989/8621/91746/94104/9444/9584/9879
BP	GO:0042471	ear morphogenesis	23/712	124/18903	2.12669e-10	2.31913e-08	1.92412e-08	23	10194/1301/2138/25836/2637/3199/340784/474/4762/497189/5076/51057/5396/5459/55084/55636/5629/64072/7020/7547/9096/9241/9423
BP	GO:0061448	connective tissue development	35/712	274/18903	2.69734e-10	2.86676e-08	2.37848e-08	35	10499/10891/1301/1386/1499/1746/2131/23369/2737/3400/340260/340419/3491/4094/4208/4781/51320/5396/5458/55553/5915/64641/6474/6660/6781/7227/7704/79068/80856/8091/8313/84159/860/8609/9241
BP	GO:0043583	ear development	31/712	221/18903	2.75712e-10	2.86676e-08	2.37848e-08	31	10194/1301/2103/2138/23322/25836/2637/2737/3199/3280/340784/4094/474/4762/497189/50508/5076/51057/5396/5459/54845/55084/55636/5629/64072/7020/7399/7547/9096/9241/9423
[truncated: 618 more rows]

## Sheet: S8
Supplemental Table S8: GO enrichment of avian UCEs.
ONTOLOGY	ID	Description	GeneRatio	BgRatio	pvalue	p.adjust	qvalue	Count	geneID
[truncated: 1,291 more rows]

## Sheet: S9
Supplemental Table S9: Counts and percentages of fast-evolving UCEs and gBGC-induced fast-evolving UCEs in each lineage.
[truncated: 21 more rows]

[truncated: 12 more sheets: S10, S11, S12, S13, S14, S15, S16, S17, S18, S19, S20, S21]
